# Supplementary material for: Knockout of cyclin dependent kinases 8 and 19 leads to depletion of cyclin C and suppresses spermatogenesis and male fertility in mice
Source: bioRxiv preprint, doi:10.1101/2023.11.04.564913, version 5 (2025-01-23)
Supplement: Suplemental Table S2 [file 564913_file11.xlsx]

## Sheet: Leydig BP
	ID	Description	GeneRatio	BgRatio	pvalue	p.adjust	qvalue	geneID	Count
GO:0004857	GO:0004857	enzyme inhibitor activity	18/177	409/28275	1.20581563258014e-10	5.19706537642042e-08	3.89668841265373e-08	Oaz3/Apoc1/Serpina3g/Rack1/Cst8/Serpinb6a/Serpina5/Cst3/Serpinb1a/Rarres1/Agt/Npm1/Txnip/Ptn/Serpinb6b/Oaz1/Spink4/Timp3	18
GO:0033293	GO:0033293	monocarboxylic acid binding	9/177	93/28275	7.3711656611157e-09	1.58848619997043e-06	1.19102518840133e-06	Apoc1/Gsta2/Serpina5/Ptgds/Nr2f2/Rbp1/Cd36/Nme2/Fabp3	9
GO:0031406	GO:0031406	carboxylic acid binding	11/177	184/28275	2.50934396220066e-08	3.60509082569495e-06	2.70304770665124e-06	Apoc1/Gsta2/Folr1/Serpina5/Ptgds/Nr2f2/Rbp1/Cd36/Glul/Nme2/Fabp3	11
GO:0005504	GO:0005504	fatty acid binding	7/177	62/28275	1.23053433837681e-07	9.26648298764014e-06	6.94788198120777e-06	Apoc1/Gsta2/Ptgds/Rbp1/Cd36/Nme2/Fabp3	7
GO:0061134	GO:0061134	peptidase regulator activity	12/177	266/28275	1.28012909454912e-07	9.26648298764014e-06	6.94788198120777e-06	Serpina3g/Rack1/Cst8/Serpinb6a/Serpina5/Cst3/Serpinb1a/Rarres1/Agt/Serpinb6b/Spink4/Timp3	12
GO:0004866	GO:0004866	endopeptidase inhibitor activity	11/177	216/28275	1.28999763169004e-07	9.26648298764014e-06	6.94788198120777e-06	Serpina3g/Cst8/Serpinb6a/Serpina5/Cst3/Serpinb1a/Rarres1/Agt/Serpinb6b/Spink4/Timp3	11
GO:0030414	GO:0030414	peptidase inhibitor activity	11/177	224/28275	1.86073353511596e-07	1.14568021947854e-05	8.59015331249021e-06	Serpina3g/Cst8/Serpinb6a/Serpina5/Cst3/Serpinb1a/Rarres1/Agt/Serpinb6b/Spink4/Timp3	11
GO:0061135	GO:0061135	endopeptidase regulator activity	11/177	232/28275	2.64483310603321e-07	1.42490383587539e-05	1.06837337309499e-05	Serpina3g/Cst8/Serpinb6a/Serpina5/Cst3/Serpinb1a/Rarres1/Agt/Serpinb6b/Spink4/Timp3	11
GO:0008035	GO:0008035	high-density lipoprotein particle binding	4/177	10/28275	3.0268581837413e-07	1.44952875243611e-05	1.08683679813869e-05	Scarb1/Hspd1/Abca1/Cd36	4
GO:0042277	GO:0042277	peptide binding	13/177	374/28275	7.49114005004937e-07	3.22868136157128e-05	2.4208210477528e-05	Apoe/Mgst1/Gsta2/Scarb1/Gstm1/Cst3/Prlr/Hsp90ab1/Ppia/Crip1/Lhcgr/Cd36/Ctsb	13
GO:0033218	GO:0033218	amide binding	14/177	452/28275	1.09456457341585e-06	4.2887030103839e-05	3.21561075635086e-05	Apoe/Mgst1/Gsta2/Scarb1/Folr1/Gstm1/Cst3/Prlr/Hsp90ab1/Ppia/Crip1/Lhcgr/Cd36/Ctsb	14
GO:0071813	GO:0071813	lipoprotein particle binding	5/177	31/28275	1.3525994030551e-06	4.4843872516673e-05	3.36233211933535e-05	Apoe/Scarb1/Hspd1/Abca1/Cd36	5
GO:0071814	GO:0071814	protein-lipid complex binding	5/177	31/28275	1.3525994030551e-06	4.4843872516673e-05	3.36233211933535e-05	Apoe/Scarb1/Hspd1/Abca1/Cd36	5
GO:0043177	GO:0043177	organic acid binding	8/177	156/28275	6.63770832446471e-06	0.000204346591988878	0.000153216274857945	Ass1/Folr1/Serpina5/Hmgcs1/Nr2f2/Cd36/Glul/Fabp3	8
GO:0016811	GO:0016811	hydrolase activity, acting on carbon-nitrogen (but not peptide) bonds, in linear amides	6/177	78/28275	9.77376201823421e-06	0.000280832761990596	0.000210564557164765	Klk1b27/Klk1b21/Klk1/Klk1b24/Klk1b1/Klk1b8	6
GO:0004867	GO:0004867	serine-type endopeptidase inhibitor activity	7/177	130/28275	1.84969406478262e-05	0.000498261338700818	0.00037358952492649	Serpina3g/Serpinb6a/Serpina5/Serpinb1a/Agt/Serpinb6b/Spink4	7
GO:0002020	GO:0002020	protease binding	8/177	185/28275	2.29255611920704e-05	0.000581230404340137	0.000435798593558242	Lcn2/Serpinb6a/Serpina5/Cst3/Kit/Serpinb6b/Insl3/Timp3	8
GO:0005501	GO:0005501	retinoid binding	4/177	34/28275	5.94394152734169e-05	0.00141941103579612	0.00106425494685409	Serpina5/Ptgds/Nr2f2/Rbp1	4
GO:0072341	GO:0072341	modified amino acid binding	6/177	109/28275	6.56644488959023e-05	0.00141941103579612	0.00106425494685409	Mgst1/Marcks/Gsta2/Scarb1/Folr1/Gstm1	6
GO:0004769	GO:0004769	steroid delta-isomerase activity	3/177	13/28275	6.58659413362468e-05	0.00141941103579612	0.00106425494685409	Hsd3b6/Gsta2/Hsd3b1	3
GO:0019840	GO:0019840	isoprenoid binding	4/177	37/28275	8.34186012355255e-05	0.00163473455544958	0.00122570157167669	Serpina5/Ptgds/Nr2f2/Rbp1	4
GO:0016717	GO:0016717	oxidoreductase activity, acting on paired donors, with oxidation of a pair of donors resulting in the reduction of molecular oxygen to two molecules of water	3/177	14/28275	8.34435271923217e-05	0.00163473455544958	0.00122570157167669	Sc5d/Fads2/Fads1	3
GO:0016853	GO:0016853	isomerase activity	7/177	167/28275	9.12977723460611e-05	0.00171084086439793	0.00128276503937029	Hsd3b6/Gsta2/Ppia/Ptgds/Hmgcs1/Hsd3b1/Hspd1	7
GO:0043295	GO:0043295	glutathione binding	3/177	18/28275	0.000183642317996467	0.00324177445637266	0.00243063807084237	Mgst1/Gsta2/Gstm1	3
GO:0016209	GO:0016209	antioxidant activity	5/177	84/28275	0.000188037961506535	0.00324177445637266	0.00243063807084237	Apoe/Mgst1/Gsta2/Prxl2a/Gpx1	5
GO:0016810	GO:0016810	hydrolase activity, acting on carbon-nitrogen (but not peptide) bonds	6/177	133/28275	0.000196495349698574	0.00325728829692635	0.00244227013592964	Klk1b27/Klk1b21/Klk1/Klk1b24/Klk1b1/Klk1b8	6
GO:1900750	GO:1900750	oligopeptide binding	3/177	19/28275	0.000217072924054232	0.00343759767588525	0.00257746363779893	Mgst1/Gsta2/Gstm1	3
GO:0004252	GO:0004252	serine-type endopeptidase activity	7/177	193/28275	0.000223324210962383	0.00343759767588525	0.00257746363779893	Klk1b27/Klk1b21/Klk1/Klk1b24/Klk1b1/Klk1b8/Htra1	7
GO:0051082	GO:0051082	unfolded protein binding	5/177	88/28275	0.000233859394354059	0.00347563444712412	0.00260598308772037	Hspe1/Hsp90ab1/Npm1/Naca/Dnajb8	5
GO:0034185	GO:0034185	apolipoprotein binding	3/177	20/28275	0.000254206458018843	0.00365209944687071	0.00273829412672929	Scarb1/Hspd1/Abca1	3
GO:0120020	GO:0120020	cholesterol transfer activity	3/177	21/28275	0.00029521185597241	0.00410439709432609	0.00307742070572258	Star/Apoe/Abca1	3
GO:0120015	GO:0120015	sterol transfer activity	3/177	22/28275	0.000340254501196858	0.00458280281299518	0.00343612275879722	Star/Apoe/Abca1	3
GO:0008236	GO:0008236	serine-type peptidase activity	7/177	210/28275	0.000372386725061667	0.00486359631822965	0.0036466578817841	Klk1b27/Klk1b21/Klk1/Klk1b24/Klk1b1/Klk1b8/Htra1	7
GO:0017171	GO:0017171	serine hydrolase activity	7/177	215/28275	0.000428794589104181	0.00543560199717359	0.00407553990263107	Klk1b27/Klk1b21/Klk1/Klk1b24/Klk1b1/Klk1b8/Htra1	7
GO:0016863	GO:0016863	intramolecular oxidoreductase activity, transposing C=C bonds	3/177	24/28275	0.000443095573842458	0.00545640549503141	0.00409113808028976	Hsd3b6/Gsta2/Hsd3b1	3
GO:0016860	GO:0016860	intramolecular oxidoreductase activity	4/177	60/28275	0.000550667289264406	0.00656964441735585	0.0049258293714208	Hsd3b6/Gsta2/Ptgds/Hsd3b1	4
GO:0004602	GO:0004602	glutathione peroxidase activity	3/177	26/28275	0.000563983395457463	0.00656964441735585	0.0049258293714208	Mgst1/Gsta2/Gpx1	3
GO:0016765	GO:0016765	transferase activity, transferring alkyl or aryl (other than methyl) groups	4/177	63/28275	0.000662932438195748	0.00751904949637809	0.00563768029158157	Mgst1/Gsta2/Gstm1/Fdps	4
GO:0005506	GO:0005506	iron ion binding	6/177	170/28275	0.000726755830836533	0.00803158366898835	0.00602197139181688	Cyp17a1/Lcn2/Sc5d/Cyp11a1/Ftl1/Fth1	6
GO:0005520	GO:0005520	insulin-like growth factor binding	3/177	29/28275	0.00078176275681206	0.00842349370464995	0.00631582016687638	Igfbp6/Igfbp2/Htra1	3
GO:0001540	GO:0001540	amyloid-beta binding	4/177	67/28275	0.000836637652831192	0.00879489825293278	0.00659429420845125	Apoe/Scarb1/Cst3/Cd36	4
GO:0004364	GO:0004364	glutathione transferase activity	3/177	31/28275	0.000952901529264904	0.00977858474078985	0.00733184885925628	Mgst1/Gsta2/Gstm1	3
GO:0005496	GO:0005496	steroid binding	5/177	122/28275	0.00104323892900705	0.0102525388277956	0.00768721313990295	Sult1e1/Star/Cyp11a1/Gstm1/Pgrmc1	5
GO:0015248	GO:0015248	sterol transporter activity	3/177	32/28275	0.00104666289657311	0.0102525388277956	0.00768721313990295	Star/Apoe/Abca1	3
GO:0001530	GO:0001530	lipopolysaccharide binding	3/177	34/28275	0.00125121558609499	0.0119838648357098	0.00898533765920847	Defb19/Scarb1/Hspd1	3
GO:0005516	GO:0005516	calmodulin binding	6/177	192/28275	0.00136172246637323	0.0127587474566709	0.00956633403150069	Marcks/Akap12/Eef1a1/Iqcf3/Cdk5rap2/Cnn3	6
GO:0038024	GO:0038024	cargo receptor activity	4/177	78/28275	0.00147616578556252	0.013536754331435	0.0101496729264881	Scarb1/Folr1/Abca1/Cd36	4
GO:0003854	GO:0003854	3-beta-hydroxy-delta5-steroid dehydrogenase activity	2/177	11/28275	0.00206504020981112	0.0181639251107876	0.013619062178561	Hsd3b6/Hsd3b1	2
GO:0015250	GO:0015250	water channel activity	2/177	11/28275	0.00206504020981112	0.0181639251107876	0.013619062178561	Aqp5/Aqp2	2
GO:0043178	GO:0043178	alcohol binding	4/177	89/28275	0.00239588010829585	0.0206524865335102	0.0154849514367753	Star/Cyp11a1/Adh1/Rbp1	4
GO:0033764	GO:0033764	steroid dehydrogenase activity, acting on the CH-OH group of donors, NAD or NADP as acceptor	3/177	44/28275	0.00264528300784556	0.0222593100952137	0.0166897257277582	Hsd3b6/Hsd3b1/Hsd17b3	3
GO:0061629	GO:0061629	RNA polymerase II-specific DNA-binding transcription factor binding	8/177	377/28275	0.00268557801612787	0.0222593100952137	0.0166897257277582	Actb/Npm1/Smarca1/Cebpb/Cited2/Tbx3/Nrip1/Id2	8
GO:0019838	GO:0019838	growth factor binding	5/177	153/28275	0.00281925137603169	0.0223550143761675	0.0167614834863437	Igfbp6/Ptn/Igfbp2/Cd36/Htra1	5
GO:0016616	GO:0016616	oxidoreductase activity, acting on the CH-OH group of donors, NAD or NADP as acceptor	5/177	154/28275	0.00289936413105486	0.0223550143761675	0.0167614834863437	Hsd3b6/Adh1/Ptgr1/Hsd3b1/Hsd17b3	5
GO:0031994	GO:0031994	insulin-like growth factor I binding	2/177	13/28275	0.00290459583541851	0.0223550143761675	0.0167614834863437	Igfbp6/Igfbp2	2
GO:1990226	GO:1990226	histone methyltransferase binding	2/177	13/28275	0.00290459583541851	0.0223550143761675	0.0167614834863437	Hsp90ab1/Resf1	2
GO:0120013	GO:0120013	lipid transfer activity	3/177	46/28275	0.00300437637380951	0.0227173020545947	0.0170331218238139	Star/Apoe/Abca1	3
GO:0005372	GO:0005372	water transmembrane transporter activity	2/177	14/28275	0.00337478788678954	0.0243661124631566	0.0182693772772966	Aqp5/Aqp2	2
GO:0008191	GO:0008191	metalloendopeptidase inhibitor activity	2/177	14/28275	0.00337478788678954	0.0243661124631566	0.0182693772772966	Rarres1/Timp3	2
GO:0016229	GO:0016229	steroid dehydrogenase activity	3/177	48/28275	0.00339203421760881	0.0243661124631566	0.0182693772772966	Hsd3b6/Hsd3b1/Hsd17b3	3
GO:0051117	GO:0051117	ATPase binding	4/177	100/28275	0.0036488694241972	0.0257813560955573	0.0193305075621836	Lhcgr/Abca1/Atox1/Fxyd1	4
GO:0016614	GO:0016614	oxidoreductase activity, acting on CH-OH group of donors	5/177	164/28275	0.0037934434194047	0.0260580379688395	0.0195379598398675	Hsd3b6/Adh1/Ptgr1/Hsd3b1/Hsd17b3	5
GO:0001046	GO:0001046	core promoter sequence-specific DNA binding	3/177	50/28275	0.00380894754532921	0.0260580379688395	0.0195379598398675	Npm1/Cebpb/H3f3a	3
GO:0005319	GO:0005319	lipid transporter activity	5/177	165/28275	0.00389256225750266	0.0262139739528695	0.0196548785041664	Star/Apoe/Abca1/Cd36/Fabp3	5
GO:0015078	GO:0015078	proton transmembrane transporter activity	4/177	105/28275	0.00434235553174104	0.0279759819511145	0.0209760079594386	Uqcrq/Atp5k/Atp5g2/Slc25a4	4
GO:0001972	GO:0001972	retinoic acid binding	2/177	16/28275	0.00441384402012943	0.0279759819511145	0.0209760079594386	Serpina5/Nr2f2	2
GO:0008320	GO:0008320	protein transmembrane transporter activity	2/177	16/28275	0.00441384402012943	0.0279759819511145	0.0209760079594386	Sec61g/Abca1	2
GO:0030228	GO:0030228	lipoprotein particle receptor activity	2/177	16/28275	0.00441384402012943	0.0279759819511145	0.0209760079594386	Scarb1/Cd36	2
GO:0003746	GO:0003746	translation elongation factor activity	2/177	17/28275	0.00498185760878632	0.0302513904245536	0.0226820780567541	Eef1a1/Eef1b2	2
GO:0004601	GO:0004601	peroxidase activity	3/177	55/28275	0.00498340770334874	0.0302513904245536	0.0226820780567541	Mgst1/Gsta2/Gpx1	3
GO:0043394	GO:0043394	proteoglycan binding	3/177	55/28275	0.00498340770334874	0.0302513904245536	0.0226820780567541	Apoe/Ptn/Ctsb	3
GO:0008199	GO:0008199	ferric iron binding	2/177	18/28275	0.00558163452013506	0.0334122844191418	0.0250520730655185	Ftl1/Fth1	2
GO:0003713	GO:0003713	transcription coactivator activity	6/177	258/28275	0.00584554694549021	0.0345127497740586	0.0258771869108218	Npm1/Cited2/Naca/Nrip1/Nme2/Rbm39	6
GO:0016684	GO:0016684	oxidoreductase activity, acting on peroxide as acceptor	3/177	59/28275	0.00606368947199269	0.0352328856229499	0.0264171349035184	Mgst1/Gsta2/Gpx1	3
GO:0005324	GO:0005324	long-chain fatty acid transporter activity	2/177	19/28275	0.00621275941379163	0.0352328856229499	0.0264171349035184	Cd36/Fabp3	2
GO:0035259	GO:0035259	nuclear glucocorticoid receptor binding	2/177	19/28275	0.00621275941379163	0.0352328856229499	0.0264171349035184	Cebpb/Nrip1	2
GO:0070064	GO:0070064	proline-rich region binding	2/177	20/28275	0.00687482085332194	0.0384811401010618	0.0288526316058761	Rabac1/Pfn1	2
GO:0003697	GO:0003697	single-stranded DNA binding	4/177	123/28275	0.00756363179440139	0.0397411724973628	0.0297973866325323	Smarca1/Hnrnpa2b1/Ncl/Cnbp	4
GO:0022884	GO:0022884	macromolecule transmembrane transporter activity	2/177	21/28275	0.00756741127409557	0.0397411724973628	0.0297973866325323	Sec61g/Abca1	2
GO:0030169	GO:0030169	low-density lipoprotein particle binding	2/177	21/28275	0.00756741127409557	0.0397411724973628	0.0297973866325323	Scarb1/Cd36	2
GO:0140318	GO:0140318	protein transporter activity	2/177	21/28275	0.00756741127409557	0.0397411724973628	0.0297973866325323	Sec61g/Abca1	2
GO:0051287	GO:0051287	NAD binding	3/177	64/28275	0.00759657674412159	0.0397411724973628	0.0297973866325323	Aldh1a1/Adh1/Gapdhs	3
GO:0004175	GO:0004175	endopeptidase activity	8/177	450/28275	0.00765317242988656	0.0397411724973628	0.0297973866325323	Klk1b27/Klk1b21/Klk1/Klk1b24/Klk1b1/Klk1b8/Htra1/Ctsb	8
GO:0048156	GO:0048156	tau protein binding	2/177	22/28275	0.00829012695138544	0.0420358201887897	0.0315178820318926	Apoe/Hsp90ab1	2
GO:0070182	GO:0070182	DNA polymerase binding	2/177	22/28275	0.00829012695138544	0.0420358201887897	0.0315178820318926	Hsp90ab1/Hnrnpa2b1	2
GO:0000979	GO:0000979	RNA polymerase II core promoter sequence-specific DNA binding	2/177	23/28275	0.00904256796871152	0.0453179859827287	0.0339788049742281	Cebpb/H3f3a	2
GO:1901681	GO:1901681	sulfur compound binding	6/177	284/28275	0.00916522349666803	0.0454047278972864	0.034043842873286	Apoe/Mgst1/Gsta2/Gstm1/Ptn/Ppia	6
GO:0042826	GO:0042826	histone deacetylase binding	4/177	133/28275	0.00989304699347789	0.0484534460703292	0.0363297299880109	Hsp90ab1/Cebpb/Bex4/Nrip1	4

## Sheet: Sertoli BP
	ID	Description	GeneRatio	BgRatio	pvalue	p.adjust	qvalue	geneID	Count
GO:0045454	GO:0045454	cell redox homeostasis	8/293	31/28814	6.69151730550168e-10	1.12094400233342e-06	8.37679054952651e-07	Prdx1/Txn1/Nfe2l1/Selenos/Prdx6/Prdx2/Egln2/Prdx6b	8
GO:0043254	GO:0043254	regulation of protein-containing complex assembly	22/293	429/28814	6.83085924639501e-10	1.12094400233342e-06	8.37679054952651e-07	Clu/Tmsb4x/Tpm1/Ppp1r9a/Pfn1/Eif4g1/Arpc1b/Cdc42/Rack1/Cdc42ep5/Map1b/Cfl1/Sh3glb1/Tmsb15b2/Stmn1/Hdac6/H3f3b/Arpc1a/Thra/Svip/Tppp3/Tppp2	22
GO:0006457	GO:0006457	protein folding	14/293	167/28814	1.98314378165035e-09	2.16955929712549e-06	1.62130702148959e-06	Clu/Mesd/Hsp90b1/Hspa5/Hspb1/Hsp90ab1/Tcp1/Pdcd5/Ppia/Pdia3/Fkbp1a/Calr/Sh3glb1/Pdcl2	14
GO:0098754	GO:0098754	detoxification	9/293	57/28814	6.03353205792843e-09	4.95051305353028e-06	3.69950781446665e-06	Mt3/Aldh1a1/Prdx1/Mt2/Mt1/Prdx6/Akr1a1/Prdx2/Prdx6b	9
GO:0006979	GO:0006979	response to oxidative stress	20/293	409/28814	9.28981783477762e-09	5.68351356242754e-06	4.24727752668661e-06	Cst3/Mt3/Aldh1a1/Hspb1/Prdx1/Txn1/Nfe2l1/Ppia/Psap/Selenos/Rack1/Cfl1/Akr1b3/Hdac6/Prdx6/Prdx2/App/Chchd2/Ndufb4/Prdx6b	20
GO:0034976	GO:0034976	response to endoplasmic reticulum stress	16/293	257/28814	1.03903355803063e-08	5.68351356242754e-06	4.24727752668661e-06	Clu/Hsp90b1/Hspa5/Nfe2l1/Eif4g1/Pdia3/Selenos/Tmco1/Calr/Ube2k/Erp29/App/Manf/Serinc3/Svip/Ube2j1	16
GO:1902903	GO:1902903	regulation of supramolecular fiber organization	19/293	388/28814	2.15063689417151e-08	1.00834146952442e-05	7.5353142307062e-06	Clu/Tmsb4x/S100a10/Actg1/Tpm1/Ppp1r9a/Pfn1/Arpc1b/Cdc42/Cdc42ep5/Map1b/Cfl1/Tmsb15b2/Stmn1/Hdac6/Lima1/App/Arpc1a/Sdc4	19
GO:0051017	GO:0051017	actin filament bundle assembly	13/293	173/28814	2.80974576858776e-08	1.02850365929146e-05	7.68598584351357e-06	Espn/S100a10/Hsp90b1/Actg1/Tpm1/Ppp1r9a/Pfn1/Cdc42/Cfl1/Tmsb15b2/Stmn1/Lima1/Sdc4	13
GO:0051098	GO:0051098	regulation of binding	19/293	397/28814	3.09523603716137e-08	1.02850365929146e-05	7.68598584351357e-06	S100a10/Actb/Calm1/Anxa2/Map1lc3b/Aplp2/1810037I17Rik/Txn1/Hsp90ab1/Ppp3ca/Eif4g1/Cdc42/Rack1/Hmgb2/Tle5/Stmn1/Cycs/App/Ybx2	19
GO:0097237	GO:0097237	cellular response to toxic substance	8/293	49/28814	3.26437703145819e-08	1.02850365929146e-05	7.68598584351357e-06	Mt3/Aldh1a1/Prdx1/Ppp1r9a/Prdx6/Akr1a1/Prdx2/Prdx6b	8
GO:0061572	GO:0061572	actin filament bundle organization	13/293	176/28814	3.44714815728398e-08	1.02850365929146e-05	7.68598584351357e-06	Espn/S100a10/Hsp90b1/Actg1/Tpm1/Ppp1r9a/Pfn1/Cdc42/Cfl1/Tmsb15b2/Stmn1/Lima1/Sdc4	13
GO:0032970	GO:0032970	regulation of actin filament-based process	19/293	414/28814	5.98983383298104e-08	1.63821955332031e-05	1.22423796761805e-05	Tmsb4x/S100a10/Ctsl/Actg1/Tpm1/Atp1a1/Acta2/Ppp1r9a/Pfn1/Arpc1b/Cdc42/Cdc42ep5/Cfl1/Tmsb15b2/Stmn1/Lima1/Arpc1a/Sdc4/Atp1a2	19
GO:0062197	GO:0062197	cellular response to chemical stress	17/293	336/28814	7.55085179578893e-08	1.90629966105994e-05	1.42457365863872e-05	Mt3/Hspb1/Prdx1/Ybx3/Txn1/Nfe2l1/Serpinb6a/Ppia/Psap/Selenos/Rack1/Cfl1/Akr1b3/Hdac6/Prdx2/App/Chchd2	17
GO:0051651	GO:0051651	maintenance of location in cell	14/293	225/28814	8.823764438198e-08	2.06854249186899e-05	1.54581737902266e-05	Ftl1/Tmsb4x/Dbi/Chchd10/Calm1/Hspa5/Fth1/Hk2/Txn1/Pfn1/Gja1/Fkbp1a/Tmsb15b2/Itpr2	14
GO:0051235	GO:0051235	maintenance of location	17/293	342/28814	9.73126661872099e-08	2.12920113617615e-05	1.59114745414877e-05	Ftl1/Tmsb4x/Dbi/Chchd10/Soat1/Calm1/Hspa5/Gm2a/Fth1/Hk2/Txn1/Pfn1/Gja1/Fkbp1a/Tmsb15b2/Thra/Itpr2	17
GO:0034599	GO:0034599	cellular response to oxidative stress	15/293	274/28814	1.62522847904738e-07	3.33374991764594e-05	2.49130418169763e-05	Mt3/Hspb1/Prdx1/Txn1/Nfe2l1/Ppia/Psap/Selenos/Rack1/Cfl1/Akr1b3/Hdac6/Prdx2/App/Chchd2	15
GO:0110053	GO:0110053	regulation of actin filament organization	15/293	276/28814	1.7851063924521e-07	3.44630540001636e-05	2.57541665288756e-05	Tmsb4x/S100a10/Actg1/Tpm1/Ppp1r9a/Pfn1/Arpc1b/Cdc42/Cdc42ep5/Cfl1/Tmsb15b2/Stmn1/Lima1/Arpc1a/Sdc4	15
GO:1990748	GO:1990748	cellular detoxification	7/293	42/28814	2.08184092609759e-07	3.79588995525128e-05	2.83666044316222e-05	Mt3/Aldh1a1/Prdx1/Prdx6/Akr1a1/Prdx2/Prdx6b	7
GO:0032271	GO:0032271	regulation of protein polymerization	13/293	209/28814	2.57025691634327e-07	4.43978063128349e-05	3.31783856791126e-05	Tmsb4x/Tpm1/Ppp1r9a/Pfn1/Arpc1b/Cdc42ep5/Map1b/Cfl1/Tmsb15b2/Stmn1/Arpc1a/Tppp3/Tppp2	13
GO:0032231	GO:0032231	regulation of actin filament bundle assembly	10/293	115/28814	2.95225027099815e-07	4.84464269470797e-05	3.620391121803e-05	S100a10/Actg1/Tpm1/Ppp1r9a/Pfn1/Cdc42/Cfl1/Tmsb15b2/Stmn1/Sdc4	10
GO:0031333	GO:0031333	negative regulation of protein-containing complex assembly	11/293	152/28814	4.85029259628379e-07	7.31745437276728e-05	5.46831799882862e-05	Clu/Tmsb4x/Tpm1/Pfn1/Cdc42/Cfl1/Tmsb15b2/Stmn1/Hdac6/Thra/Svip	11
GO:0032507	GO:0032507	maintenance of protein location in cell	8/293	69/28814	5.07608201845402e-07	7.31745437276728e-05	5.46831799882862e-05	Tmsb4x/Chchd10/Hspa5/Hk2/Txn1/Pfn1/Gja1/Tmsb15b2	8
GO:0009636	GO:0009636	response to toxic substance	10/293	122/28814	5.12801494739937e-07	7.31745437276728e-05	5.46831799882862e-05	Mt3/Aldh1a1/Prdx1/Mt2/Ppp1r9a/Mt1/Prdx6/Akr1a1/Prdx2/Prdx6b	10
GO:0051492	GO:0051492	regulation of stress fiber assembly	9/293	99/28814	7.9972413312162e-07	0.000109362275204382	8.17261943058498e-05	S100a10/Actg1/Tpm1/Ppp1r9a/Pfn1/Cdc42/Tmsb15b2/Stmn1/Sdc4	9
GO:1905897	GO:1905897	regulation of response to endoplasmic reticulum stress	8/293	75/28814	9.71620370650322e-07	0.000121292699749077	9.06417750458159e-05	Clu/Nfe2l1/Selenos/Erp29/App/Manf/Serinc3/Svip	8
GO:0045185	GO:0045185	maintenance of protein location	9/293	102/28814	1.03040067114402e-06	0.000121292699749077	9.06417750458159e-05	Tmsb4x/Chchd10/Hspa5/Hk2/Txn1/Pfn1/Gja1/Tmsb15b2/Thra	9
GO:0051258	GO:0051258	protein polymerization	14/293	276/28814	1.04958820449443e-06	0.000121292699749077	9.06417750458159e-05	Tmsb4x/Tpm1/Ppp1r9a/Pfn1/Arpc1b/Cdc42ep5/Map1b/Cfl1/Ube2k/Tmsb15b2/Stmn1/Arpc1a/Tppp3/Tppp2	14
GO:0001667	GO:0001667	ameboidal-type cell migration	18/293	452/28814	1.05785399286917e-06	0.000121292699749077	9.06417750458159e-05	Sparc/Akap12/Hspb1/Macf1/Acta2/Syne2/Pfn1/Map4k4/Cdc42/Itgb1/Cfl1/Calr/Bsg/Hdac6/Pkn2/Sdc4/Csnk2b/Sema5b	18
GO:2001233	GO:2001233	regulation of apoptotic signaling pathway	17/293	406/28814	1.07175146030568e-06	0.000121292699749077	9.06417750458159e-05	Clu/Mif/Hspb1/Tpt1/Ybx3/Ppia/Pdia3/Selenos/Rack1/Hmgb2/Sh3glb1/Higd1a/Erp29/Prdx2/Acaa2/Serinc3/Bcl2l14	17
GO:0007015	GO:0007015	actin filament organization	18/293	458/28814	1.27582959054594e-06	0.000135142413342239	0.000100991636385842	Tmsb4x/Espn/S100a10/Hsp90b1/Actg1/Tpm1/Ppp1r9a/Pfn1/Arpc1b/Cdc42/Cdc42ep5/Tpm4/Cfl1/Tmsb15b2/Stmn1/Lima1/Arpc1a/Sdc4	18
GO:0032956	GO:0032956	regulation of actin cytoskeleton organization	16/293	366/28814	1.2764822710571e-06	0.000135142413342239	0.000100991636385842	Tmsb4x/S100a10/Ctsl/Actg1/Tpm1/Ppp1r9a/Pfn1/Arpc1b/Cdc42/Cdc42ep5/Cfl1/Tmsb15b2/Stmn1/Lima1/Arpc1a/Sdc4	16
GO:0051494	GO:0051494	negative regulation of cytoskeleton organization	11/293	176/28814	2.06588590375672e-06	0.000204565259624651	0.000152871180899143	Tmsb4x/Espn/Tpm1/Ppp1r9a/Pfn1/Map1b/Cfl1/Tmsb15b2/Stmn1/Hdac6/Lima1	11
GO:0110020	GO:0110020	regulation of actomyosin structure organization	9/293	111/28814	2.09908099452355e-06	0.000204565259624651	0.000152871180899143	S100a10/Actg1/Tpm1/Ppp1r9a/Pfn1/Cdc42/Tmsb15b2/Stmn1/Sdc4	9
GO:2001242	GO:2001242	regulation of intrinsic apoptotic signaling pathway	11/293	177/28814	2.18313911793848e-06	0.000204565259624651	0.000152871180899143	Clu/Mif/Hspb1/Tpt1/Ybx3/Ppia/Selenos/Rack1/Sh3glb1/Erp29/Serinc3	11
GO:0032386	GO:0032386	regulation of intracellular transport	15/293	337/28814	2.20398979835827e-06	0.000204565259624651	0.000152871180899143	Reep1/Anxa2/Oaz1/Txn1/Hsp90ab1/Ifi27/Pdcd5/Cdc42/Map1b/Sh3glb1/Reep2/Gcc2/Chp2/Svip/Ube2j1	15
GO:0010038	GO:0010038	response to metal ion	14/293	295/28814	2.29450694696067e-06	0.000204565259624651	0.000152871180899143	Calm1/Mt3/Mt2/Stim1/Anxa5/Mt1/Ppp3ca/Nfe2l1/Jund/App/Chp2/Wnk1/Pgam2/Sord	14
GO:1902904	GO:1902904	negative regulation of supramolecular fiber organization	11/293	178/28814	2.30618970326389e-06	0.000204565259624651	0.000152871180899143	Clu/Tmsb4x/Tpm1/Ppp1r9a/Pfn1/Map1b/Cfl1/Tmsb15b2/Stmn1/Hdac6/Lima1	11
GO:0030038	GO:0030038	contractile actin filament bundle assembly	9/293	116/28814	3.02981563976345e-06	0.000254970639223171	0.000190539013242884	S100a10/Actg1/Tpm1/Ppp1r9a/Pfn1/Cdc42/Tmsb15b2/Stmn1/Sdc4	9
GO:0043149	GO:0043149	stress fiber assembly	9/293	116/28814	3.02981563976345e-06	0.000254970639223171	0.000190539013242884	S100a10/Actg1/Tpm1/Ppp1r9a/Pfn1/Cdc42/Tmsb15b2/Stmn1/Sdc4	9
GO:0098869	GO:0098869	cellular oxidant detoxification	5/293	24/28814	3.81158051963589e-06	0.000312740181636125	0.00023371006870399	Mt3/Prdx1/Prdx6/Prdx2/Prdx6b	5
GO:0043462	GO:0043462	regulation of ATP-dependent activity	7/293	70/28814	7.25538532006738e-06	0.000580784746840516	0.000434019198864108	Tnni3/Tpm1/1810037I17Rik/Atp1b1/Pfn1/Atp1b3/Cnn3	7
GO:0010639	GO:0010639	negative regulation of organelle organization	15/293	373/28814	7.51992572890247e-06	0.000587628481958522	0.000439133507477262	Tmsb4x/Espn/Tpm1/H3f3a/Ppp1r9a/Pfn1/Map1b/Cfl1/Higd1a/Tmsb15b2/Stmn1/Hdac6/H3f3b/Lima1/Acaa2	15
GO:0022898	GO:0022898	regulation of transmembrane transporter activity	13/293	284/28814	7.79252363680051e-06	0.00059047130486373	0.000441257942952786	Actb/Calm1/1810037I17Rik/Stim1/Atp1b1/Atp1b3/Gja1/Itgb1/Fkbp1a/Cfl1/App/Wnk1/Atp1a2	13
GO:0008064	GO:0008064	regulation of actin polymerization or depolymerization	10/293	165/28814	7.9161296203547e-06	0.00059047130486373	0.000441257942952786	Tmsb4x/Tpm1/Ppp1r9a/Pfn1/Arpc1b/Cdc42ep5/Cfl1/Tmsb15b2/Lima1/Arpc1a	10
GO:0046688	GO:0046688	response to copper ion	5/293	28/28814	8.52456209739781e-06	0.000621724728970214	0.000464613559928349	Mt3/Mt2/Mt1/Nfe2l1/Sord	5
GO:2001234	GO:2001234	negative regulation of apoptotic signaling pathway	12/293	246/28814	9.22894131336506e-06	0.000634262254191441	0.000473982825705141	Clu/Mif/Hspb1/Tpt1/Ybx3/Ppia/Selenos/Hmgb2/Sh3glb1/Higd1a/Prdx2/Acaa2	12
GO:2001243	GO:2001243	negative regulation of intrinsic apoptotic signaling pathway	8/293	101/28814	9.26530280061932e-06	0.000634262254191441	0.000473982825705141	Clu/Mif/Hspb1/Tpt1/Ybx3/Ppia/Selenos/Sh3glb1	8
GO:0030832	GO:0030832	regulation of actin filament length	10/293	168/28814	9.27623040864997e-06	0.000634262254191441	0.000473982825705141	Tmsb4x/Tpm1/Ppp1r9a/Pfn1/Arpc1b/Cdc42ep5/Cfl1/Tmsb15b2/Lima1/Arpc1a	10
GO:0042744	GO:0042744	hydrogen peroxide catabolic process	5/293	30/28814	1.2156560342097e-05	0.000810552242568253	0.000605723956888941	Mt3/Prdx1/Prdx6/Prdx2/Prdx6b	5
GO:0031032	GO:0031032	actomyosin structure organization	11/293	213/28814	1.28027656413295e-05	0.000810552242568253	0.000605723956888941	S100a10/Actg1/Tpm1/Ppp1r9a/Pfn1/Cdc42/Itgb1/Tmsb15b2/Stmn1/Cnn3/Sdc4	11
GO:0032409	GO:0032409	regulation of transporter activity	13/293	298/28814	1.30118782385822e-05	0.000810552242568253	0.000605723956888941	Actb/Calm1/1810037I17Rik/Stim1/Atp1b1/Atp1b3/Gja1/Itgb1/Fkbp1a/Cfl1/App/Wnk1/Atp1a2	13
GO:0030007	GO:0030007	cellular potassium ion homeostasis	4/293	15/28814	1.30893567507975e-05	0.000810552242568253	0.000605723956888941	Atp1a1/Atp1b1/Atp1b3/Atp1a2	4
GO:0036376	GO:0036376	sodium ion export across plasma membrane	4/293	15/28814	1.30893567507975e-05	0.000810552242568253	0.000605723956888941	Atp1a1/Atp1b1/Atp1b3/Atp1a2	4
GO:0034329	GO:0034329	cell junction assembly	16/293	441/28814	1.35123574287022e-05	0.000816902129561613	0.000610469213855017	S100a10/Actb/Actg1/Macf1/Ppp1r9a/Cadm1/Map4k4/Eif4g1/Gja1/Cdc42/Itgb1/Cfl1/App/Pkn2/Sdc4/Dnm3	16
GO:0006066	GO:0006066	alcohol metabolic process	14/293	345/28814	1.36897066197102e-05	0.000816902129561613	0.000610469213855017	Soat1/Mt3/Pgp/Aldh1a1/Aplp2/Dhrs7/Nfe2l1/Rbp1/Akr1b3/Nudt4/Akr1a1/Lima1/App/Sord	14
GO:0032535	GO:0032535	regulation of cellular component size	15/293	393/28814	1.39388778160176e-05	0.000816917803431604	0.000610480926904531	Tmsb4x/Mt3/Tpm1/Macf1/Ppp1r9a/Hsp90ab1/Pfn1/Arpc1b/Cdc42ep5/Map1b/Cfl1/Tmsb15b2/Lima1/Arpc1a/Sema5b	15
GO:0034614	GO:0034614	cellular response to reactive oxygen species	9/293	143/28814	1.66835054138068e-05	0.000960618680142351	0.000717868284656878	Mt3/Prdx1/Txn1/Psap/Rack1/Cfl1/Akr1b3/Hdac6/Prdx2	9
GO:1903201	GO:1903201	regulation of oxidative stress-induced cell death	7/293	80/28814	1.76322372190986e-05	0.000997741423328995	0.000745610031225042	Hspb1/Txn1/Ppia/Psap/Rack1/Hdac6/App	7
GO:0046916	GO:0046916	cellular transition metal ion homeostasis	8/293	111/28814	1.85451598267461e-05	0.00103161380595561	0.000770922790300062	Ftl1/Mt3/Aplp2/Fth1/Mt2/Mt1/App/Bola2	8
GO:0030833	GO:0030833	regulation of actin filament polymerization	9/293	146/28814	1.96912229892081e-05	0.00107710989750968	0.000804921922190436	Tmsb4x/Tpm1/Ppp1r9a/Pfn1/Arpc1b/Cdc42ep5/Cfl1/Tmsb15b2/Arpc1a	9
GO:0031647	GO:0031647	regulation of protein stability	13/293	313/28814	2.1804275857753e-05	0.00117314153057615	0.000876686156144339	Clu/Mt3/Serf2/Gapdh/Hsp90ab1/Tcp1/Atp1b1/Pfn1/Atp1b3/Calr/Ncor2/Hdac6/Dad1	13
GO:0033157	GO:0033157	regulation of intracellular protein transport	11/293	227/28814	2.31320675101593e-05	0.00122450718658618	0.000915071600996116	Oaz1/Txn1/Hsp90ab1/Ifi27/Pdcd5/Cdc42/Sh3glb1/Gcc2/Chp2/Svip/Ube2j1	11
GO:0018209	GO:0018209	peptidyl-serine modification	14/293	364/28814	2.4773181122654e-05	0.00129056476896112	0.000964436290990539	Mif/H3f3a/Txn1/Hsp90ab1/Eif4g1/Srpk2/Rack1/Csnk1g2/Hdac6/Spock2/App/Pkn2/Wnk1/Tssk2	14
GO:0005996	GO:0005996	monosaccharide metabolic process	12/293	273/28814	2.59720260615326e-05	0.00133187796146797	0.000995309551371234	Pgp/Hk2/Gapdh/Ncoa2/Nfe2l1/Fuca1/Akr1b3/Akr1a1/Fabp5/Man2a1/Pgam2/Sord	12
GO:0042743	GO:0042743	hydrogen peroxide metabolic process	6/293	58/28814	2.72721608214726e-05	0.00135617017903141	0.00101346307358901	Mt3/Prdx1/Cycs/Prdx6/Prdx2/Prdx6b	6
GO:0043666	GO:0043666	regulation of phosphoprotein phosphatase activity	6/293	58/28814	2.72721608214726e-05	0.00135617017903141	0.00101346307358901	Hsp90b1/Calm1/Ppp1r11/Hsp90ab1/Bod1l/Csnk2b	6
GO:0000302	GO:0000302	response to reactive oxygen species	10/293	191/28814	2.82049184045693e-05	0.00136250524974989	0.00101819725838457	Mt3/Prdx1/Txn1/Psap/Rack1/Cfl1/Akr1b3/Hdac6/Prdx6/Prdx2	10
GO:0010921	GO:0010921	regulation of phosphatase activity	7/293	86/28814	2.83157863208399e-05	0.00136250524974989	0.00101819725838457	Hsp90b1/Calm1/Ppp1r11/Hsp90ab1/Bod1l/Chp2/Csnk2b	7
GO:0071280	GO:0071280	cellular response to copper ion	4/293	18/28814	2.86449915395316e-05	0.00136250524974989	0.00101819725838457	Mt3/Mt2/Mt1/Nfe2l1	4
GO:0051099	GO:0051099	positive regulation of binding	10/293	193/28814	3.0827929561598e-05	0.00144538949744521	0.00108013647937629	S100a10/Calm1/Anxa2/Map1lc3b/Txn1/Hsp90ab1/Eif4g1/Hmgb2/Stmn1/App	10
GO:0050821	GO:0050821	protein stabilization	10/293	195/28814	3.36570171588249e-05	0.00155580746922906	0.00116265159347757	Clu/Mt3/Gapdh/Hsp90ab1/Tcp1/Atp1b1/Pfn1/Atp1b3/Calr/Ncor2	10
GO:0008154	GO:0008154	actin polymerization or depolymerization	10/293	198/28814	3.8315928982187e-05	0.00174656776277136	0.00130520635275579	Tmsb4x/Tpm1/Ppp1r9a/Pfn1/Arpc1b/Cdc42ep5/Cfl1/Tmsb15b2/Lima1/Arpc1a	10
GO:1900407	GO:1900407	regulation of cellular response to oxidative stress	7/293	91/28814	4.085015392049e-05	0.00183657815297326	0.001372470924798	Hspb1/Txn1/Ppia/Psap/Rack1/Hdac6/App	7
GO:0051893	GO:0051893	regulation of focal adhesion assembly	6/293	64/28814	4.80051277447888e-05	0.00207306354287364	0.00154919595076673	S100a10/Actg1/Macf1/Map4k4/Cfl1/Sdc4	6
GO:0061077	GO:0061077	chaperone-mediated protein folding	6/293	64/28814	4.80051277447888e-05	0.00207306354287364	0.00154919595076673	Clu/Hspa5/Hspb1/Tcp1/Pdcd5/Fkbp1a	6
GO:0090109	GO:0090109	regulation of cell-substrate junction assembly	6/293	64/28814	4.80051277447888e-05	0.00207306354287364	0.00154919595076673	S100a10/Actg1/Macf1/Map4k4/Cfl1/Sdc4	6
GO:0018105	GO:0018105	peptidyl-serine phosphorylation	13/293	339/28814	4.96559268512367e-05	0.0021165032717631	0.00158165836723693	Mif/H3f3a/Txn1/Hsp90ab1/Eif4g1/Srpk2/Rack1/Csnk1g2/Hdac6/App/Pkn2/Wnk1/Tssk2	13
GO:0035304	GO:0035304	regulation of protein dephosphorylation	7/293	94/28814	5.03387995195705e-05	0.00211810179516962	0.00158285294035897	Hsp90b1/Calm1/Ppp1r11/Hsp90ab1/Bod1l/Ppia/Csnk2b	7
GO:0032232	GO:0032232	negative regulation of actin filament bundle assembly	5/293	40/28814	5.16547811567839e-05	0.00214596192096918	0.00160367275276891	Ppp1r9a/Pfn1/Cfl1/Tmsb15b2/Stmn1	5
GO:0031346	GO:0031346	positive regulation of cell projection organization	15/293	443/28814	5.51317482764099e-05	0.00225847404059075	0.00168775281906939	Espn/Hspa5/Hspb1/Macf1/Ppp1r9a/Pfn1/Cdc42/Cdc42ep5/Map1b/Itgb1/Cfl1/Sh3glb1/Nme2/Dnm3/Lrp8	15
GO:0099173	GO:0099173	postsynapse organization	10/293	207/28814	5.57393044752744e-05	0.00225847404059075	0.00168775281906939	Mesd/Actb/Ppp1r9a/Cadm1/Cdc42/Cfl1/Hdac6/App/Dnm3/Lrp8	10
GO:0042176	GO:0042176	regulation of protein catabolic process	14/293	393/28814	5.68376788174303e-05	0.00227489343754642	0.00170002299928899	Clu/Timp2/Anxa2/Oaz1/Hsp90ab1/Laptm4b/Nfe2l1/Gja1/Rack1/Psme1/Ube2k/App/Egln2/Svip	14
GO:0051592	GO:0051592	response to calcium ion	8/293	131/28814	6.09996822735453e-05	0.00241205972556356	0.0018025270728898	Calm1/Stim1/Anxa5/Ppp3ca/Jund/App/Chp2/Wnk1	8
GO:0030041	GO:0030041	actin filament polymerization	9/293	169/28814	6.20999673137228e-05	0.00242633443718617	0.00181319453434805	Tmsb4x/Tpm1/Ppp1r9a/Pfn1/Arpc1b/Cdc42ep5/Cfl1/Tmsb15b2/Arpc1a	9
GO:0072595	GO:0072595	maintenance of protein localization in organelle	5/293	42/28814	6.56794684396328e-05	0.00253600018139853	0.00189514751039436	Chchd10/Hspa5/Hk2/Txn1/Gja1	5
GO:0035303	GO:0035303	regulation of dephosphorylation	8/293	134/28814	7.15776591691534e-05	0.00273160322550188	0.00204132124680695	Hsp90b1/Calm1/Ppp1r11/Hsp90ab1/Bod1l/Ppia/Chp2/Csnk2b	8
GO:0150116	GO:0150116	regulation of cell-substrate junction organization	6/293	69/28814	7.35644419129497e-05	0.00277515515354369	0.00207386750946368	S100a10/Actg1/Macf1/Map4k4/Cfl1/Sdc4	6
GO:1902882	GO:1902882	regulation of response to oxidative stress	7/293	100/28814	7.47499652235579e-05	0.00278783393026951	0.00208334233218768	Hspb1/Txn1/Ppia/Psap/Rack1/Hdac6/App	7
GO:0097061	GO:0097061	dendritic spine organization	7/293	101/28814	7.96264826380318e-05	0.00293633838222495	0.00219431939144428	Ppp1r9a/Cdc42/Cfl1/Hdac6/App/Dnm3/Lrp8	7
GO:0097193	GO:0097193	intrinsic apoptotic signaling pathway	12/293	308/28814	8.30171359421778e-05	0.00302735822402475	0.00226233832450613	Clu/Mif/Hspb1/Tpt1/Ybx3/Ppia/Selenos/Rack1/Sh3glb1/Ube2k/Erp29/Serinc3	12
GO:0036473	GO:0036473	cell death in response to oxidative stress	7/293	102/28814	8.47593495824625e-05	0.00305692511351255	0.00228443359776909	Hspb1/Txn1/Ppia/Psap/Rack1/Hdac6/App	7
GO:0043393	GO:0043393	regulation of protein binding	10/293	218/28814	8.58127746188002e-05	0.00306127745977068	0.00228768609681699	Actb/Anxa2/Map1lc3b/Aplp2/Hsp90ab1/Cdc42/Rack1/Tle5/Cycs/App	10
GO:0046034	GO:0046034	ATP metabolic process	11/293	263/28814	8.76446718151522e-05	0.00307290016421465	0.00229637171898397	Chchd10/Hk2/Gapdh/Atp1b1/Pgam1/Atp5j/Cycs/App/Chchd2/Atp1a2/Pgam2	11
GO:0055076	GO:0055076	transition metal ion homeostasis	8/293	138/28814	8.80111564400296e-05	0.00307290016421465	0.00229637171898397	Ftl1/Mt3/Aplp2/Fth1/Mt2/Mt1/App/Bola2	8
GO:1901888	GO:1901888	regulation of cell junction assembly	10/293	220/28814	9.25445477846917e-05	0.00319717058767745	0.00238923874059093	S100a10/Actg1/Macf1/Ppp1r9a/Map4k4/Eif4g1/Gja1/Cfl1/App/Sdc4	10
GO:0010811	GO:0010811	positive regulation of cell-substrate adhesion	8/293	140/28814	9.73318734144794e-05	0.00332753342235752	0.00248665860806729	S100a10/Map4k4/Cdc42/Itgb1/Cfl1/Calr/Spock2/Sdc4	8
GO:0006936	GO:0006936	muscle contraction	12/293	314/28814	9.95871421894184e-05	0.00336953608933682	0.00251804711124628	Tnni3/Myl6/Calm1/Tpm1/Atp1a1/Acta2/Atp1b1/Tpm4/Fkbp1a/Grcc10/Atp1a2/Pgam2	12
GO:0060997	GO:0060997	dendritic spine morphogenesis	6/293	73/28814	0.00010097723359559	0.00338170694551763	0.00252714236603357	Ppp1r9a/Cdc42/Cfl1/Hdac6/Dnm3/Lrp8	6
GO:1902905	GO:1902905	positive regulation of supramolecular fiber organization	9/293	183/28814	0.000114271149192739	0.00378826173384413	0.00283095988962341	S100a10/Tpm1/Pfn1/Cdc42/Cdc42ep5/Map1b/Cfl1/App/Sdc4	9
GO:0061687	GO:0061687	detoxification of inorganic compound	3/293	10/28814	0.000118455583885289	0.00384922006249027	0.00287651391821493	Mt3/Mt2/Mt1	3
GO:0097501	GO:0097501	stress response to metal ion	3/293	10/28814	0.000118455583885289	0.00384922006249027	0.00287651391821493	Mt3/Mt2/Mt1	3
GO:0010810	GO:0010810	regulation of cell-substrate adhesion	10/293	227/28814	0.000119743681789459	0.00385292905522552	0.00287928564055148	S100a10/Actg1/Macf1/Map4k4/Cdc42/Itgb1/Cfl1/Calr/Spock2/Sdc4	10
GO:0032412	GO:0032412	regulation of ion transmembrane transporter activity	11/293	274/28814	0.000125785249579221	0.00400803096232043	0.00299519296392014	Calm1/1810037I17Rik/Stim1/Atp1b1/Atp1b3/Itgb1/Fkbp1a/Cfl1/App/Wnk1/Atp1a2	11
GO:0106027	GO:0106027	neuron projection organization	7/293	109/28814	0.000128750908365661	0.0040630815505394	0.00303633215072864	Ppp1r9a/Cdc42/Cfl1/Hdac6/App/Dnm3/Lrp8	7
GO:0006883	GO:0006883	cellular sodium ion homeostasis	4/293	26/28814	0.000131258831961452	0.00410277606188082	0.00306599577413718	Atp1a1/Atp1b1/Atp1b3/Atp1a2	4
GO:0048813	GO:0048813	dendrite morphogenesis	9/293	187/28814	0.000134601235112613	0.00416755899659995	0.00311440792266522	Ppp1r9a/Ppp3ca/Cdc42/Itgb1/Cfl1/Sh3glb1/Hdac6/Dnm3/Lrp8	9
GO:1990573	GO:1990573	potassium ion import across plasma membrane	5/293	49/28814	0.000138926649346767	0.00426128283323447	0.0031844475452825	Atp1a1/Atp1b1/Atp1b3/Wnk1/Atp1a2	5
GO:0030004	GO:0030004	cellular monovalent inorganic cation homeostasis	7/293	111/28814	0.000144248405726181	0.00438354877401228	0.00327581662126708	Ppt1/Atp1a1/Slc4a7/Atp1b1/Atp1b3/Atp6v0c/Atp1a2	7
GO:0060560	GO:0060560	developmental growth involved in morphogenesis	11/293	281/28814	0.000156778801767258	0.00472062410458846	0.00352771229471475	Mt3/Macf1/Hsp90ab1/Cadm1/Map1b/Itgb1/Cfl1/Sh3glb1/Hdac6/App/Sema5b	11
GO:0031055	GO:0031055	chromatin remodeling at centromere	3/293	11/28814	0.000161650991288459	0.0048230777582611	0.00360427569092927	H3f3a/H3f3b/Nasp	3
GO:1903829	GO:1903829	positive regulation of protein localization	15/293	491/28814	0.000171214212154129	0.00506238778639505	0.0037831115630073	Mesd/Oaz1/Hsp90ab1/Tcp1/Pdcd5/Ppia/Gja1/Cdc42/Rack1/Itgb1/Cfl1/Sh3glb1/Bsg/App/Chp2	15
GO:0060047	GO:0060047	heart contraction	10/293	238/28814	0.00017600812322939	0.00513833787376845	0.00383986890082443	Tnni3/Calm1/Tpm1/Atp1a1/Atp1b1/Gja1/Cdc42/Atp5j/Thra/Atp1a2	10
GO:0051894	GO:0051894	positive regulation of focal adhesion assembly	4/293	28/28814	0.000176914131546568	0.00513833787376845	0.00383986890082443	S100a10/Map4k4/Cfl1/Sdc4	4
GO:0007409	GO:0007409	axonogenesis	15/293	493/28814	0.00017888136385113	0.00514990031718779	0.00384850949005663	Actb/Vim/Mt3/Aplp2/Macf1/Hsp90ab1/Map1b/Itgb1/Bsg/Stmn1/Hdac6/App/Grcc10/Sema5b/Chl1	15
GO:0050808	GO:0050808	synapse organization	15/293	494/28814	0.000182825377163459	0.00521767728565629	0.00389915907360055	Malat1/Sparc/Mesd/Chchd10/Actb/Ppp1r9a/Pfn1/Cadm1/Eif4g1/Cdc42/Cfl1/Hdac6/App/Dnm3/Lrp8	15
GO:1904951	GO:1904951	positive regulation of establishment of protein localization	12/293	337/28814	0.000192132248439205	0.00543601758084027	0.00406232430910479	Oaz1/Hsp90ab1/Tcp1/Pdcd5/Ppia/Gja1/Cdc42/Rack1/Sh3glb1/Bsg/App/Chp2	12
GO:0022604	GO:0022604	regulation of cell morphogenesis	12/293	338/28814	0.00019743098806176	0.00553484310969989	0.00413617641540804	Sparc/S100a10/Tpm1/Macf1/Myl12a/Cdc42/Cdc42ep5/Cfl1/Calr/Sh3glb1/Myl12b/Lrp8	12
GO:0008016	GO:0008016	regulation of heart contraction	9/293	197/28814	0.000198998015522421	0.00553484310969989	0.00413617641540804	Tnni3/Calm1/Tpm1/Atp1a1/Atp1b1/Gja1/Atp5j/Thra/Atp1a2	9
GO:0042989	GO:0042989	sequestering of actin monomers	3/293	12/28814	0.00021391382333972	0.0058997072958064	0.00440883864114594	Tmsb4x/Pfn1/Tmsb15b2	3
GO:0030433	GO:0030433	ubiquitin-dependent ERAD pathway	6/293	84/28814	0.000219651219405397	0.0059256577767986	0.00442823138007657	Hsp90b1/Hspa5/Selenos/Calr/Svip/Ube2j1	6
GO:0032272	GO:0032272	negative regulation of protein polymerization	6/293	84/28814	0.000219651219405397	0.0059256577767986	0.00442823138007657	Tmsb4x/Tpm1/Pfn1/Cfl1/Tmsb15b2/Stmn1	6
GO:1903202	GO:1903202	negative regulation of oxidative stress-induced cell death	5/293	54/28814	0.000221061146020116	0.0059256577767986	0.00442823138007657	Hspb1/Txn1/Ppia/Psap/Rack1	5
GO:0006090	GO:0006090	pyruvate metabolic process	7/293	119/28814	0.000222076753975085	0.0059256577767986	0.00442823138007657	Ldhb/Hk2/Gapdh/Pgam1/Me1/App/Pgam2	7
GO:0001662	GO:0001662	behavioral fear response	5/293	55/28814	0.000241163445726114	0.00638305184575085	0.00477004098931957	Dbi/Eif4e/Eif4g1/Gja1/Atp1a2	5
GO:0048041	GO:0048041	focal adhesion assembly	6/293	86/28814	0.000249792803554256	0.00655855985012055	0.00490119774552772	S100a10/Actg1/Macf1/Map4k4/Cfl1/Sdc4	6
GO:0006470	GO:0006470	protein dephosphorylation	10/293	249/28814	0.00025304261417127	0.0065911576167469	0.00492555798679248	Hsp90b1/Calm1/Ppp1r11/Pgp/Hsp90ab1/Ppp3ca/Bod1l/Ppia/Csnk2b/Ppm1g	10
GO:0003015	GO:0003015	heart process	10/293	250/28814	0.000261264145492835	0.00673387677688708	0.00503221170985179	Tnni3/Calm1/Tpm1/Atp1a1/Atp1b1/Gja1/Cdc42/Atp5j/Thra/Atp1a2	10
GO:0002209	GO:0002209	behavioral defense response	5/293	56/28814	0.000262625297818875	0.00673387677688708	0.00503221170985179	Dbi/Eif4e/Eif4g1/Gja1/Atp1a2	5
GO:0006983	GO:0006983	ER overload response	3/293	13/28814	0.000275997756432377	0.00699639455970752	0.00522839068735961	Hspa5/Selenos/Tmco1	3
GO:0031334	GO:0031334	positive regulation of protein-containing complex assembly	9/293	206/28814	0.00027712714587507	0.00699639455970752	0.00522839068735961	Clu/Pfn1/Eif4g1/Rack1/Cdc42ep5/Map1b/Sh3glb1/Tppp3/Tppp2	9
GO:0006942	GO:0006942	regulation of striated muscle contraction	6/293	88/28814	0.000283094613692844	0.00704341777983634	0.00526353103916696	Tnni3/Calm1/Atp1a1/Atp1b1/Grcc10/Atp1a2	6
GO:0071496	GO:0071496	cellular response to external stimulus	11/293	301/28814	0.000283281885112248	0.00704341777983634	0.00526353103916696	Nupr1l/Hspa5/Map1lc3b/Atp1a1/Eif4g1/Pdia3/Sh3glb1/Tle5/Higd1a/Gabarapl1/Atp1a2	11
GO:0007338	GO:0007338	single fertilization	8/293	164/28814	0.000288599046104361	0.00712166969409407	0.00532200852729055	H3f3a/Tcp1/H3f3b/Kmt2c/Mfge8/Dkkl1/Ppp3r2/Ccdc136	8
GO:0072659	GO:0072659	protein localization to plasma membrane	11/293	302/28814	0.000291386457953794	0.00713679369406234	0.00533331066011265	S100a10/Actb/Anxa2/Macf1/Myl12a/Atp1b1/Sys1/Atp1b3/Rack1/Itgb1/Bsg	11
GO:1901019	GO:1901019	regulation of calcium ion transmembrane transporter activity	6/293	89/28814	0.000301001613563358	0.00731645955056309	0.00546757457032362	Calm1/1810037I17Rik/Stim1/Atp1b1/Fkbp1a/Atp1a2	6
GO:0016032	GO:0016032	viral process	12/293	355/28814	0.000308539258292257	0.00731645955056309	0.00546757457032362	Ctsl/Hsp90ab1/Ifi27/Pfn1/Ppia/Srpk2/Cdc42/Cfl1/Bsg/Slc3a2/Pkn2/4930486L24Rik	12
GO:0010761	GO:0010761	fibroblast migration	5/293	58/28814	0.000309868335627139	0.00731645955056309	0.00546757457032362	Akap12/Acta2/Syne2/Itgb1/Sdc4	5
GO:0048524	GO:0048524	positive regulation of viral process	5/293	58/28814	0.000309868335627139	0.00731645955056309	0.00546757457032362	Pfn1/Ppia/Srpk2/Bsg/Pkn2	5
GO:0051496	GO:0051496	positive regulation of stress fiber assembly	5/293	58/28814	0.000309868335627139	0.00731645955056309	0.00546757457032362	S100a10/Tpm1/Pfn1/Cdc42/Sdc4	5
GO:0019318	GO:0019318	hexose metabolic process	10/293	257/28814	0.000325315483536573	0.00762632440690737	0.00569913591458808	Pgp/Hk2/Gapdh/Ncoa2/Nfe2l1/Fuca1/Fabp5/Man2a1/Pgam2/Sord	10
GO:0055067	GO:0055067	monovalent inorganic cation homeostasis	8/293	168/28814	0.000339408879041061	0.00779695183855863	0.00582664542924456	Ppt1/Atp1a1/Slc4a7/Atp1b1/Atp1b3/Atp6v0c/Chp2/Atp1a2	8
GO:0033032	GO:0033032	regulation of myeloid cell apoptotic process	4/293	33/28814	0.000339720936293078	0.00779695183855863	0.00582664542924456	Mif/Tcp1/Selenos/Thra	4
GO:0150117	GO:0150117	positive regulation of cell-substrate junction organization	4/293	33/28814	0.000339720936293078	0.00779695183855863	0.00582664542924456	S100a10/Map4k4/Cfl1/Sdc4	4
GO:0045807	GO:0045807	positive regulation of endocytosis	7/293	128/28814	0.0003468271585729	0.00789107983557501	0.0058969870800506	Clu/Anxa2/Ppt1/Ppp3ca/Cdc42/Itgb1/App	7
GO:0071294	GO:0071294	cellular response to zinc ion	3/293	14/28814	0.000348630888530888	0.00789107983557501	0.0058969870800506	Mt3/Mt2/Mt1	3
GO:0019058	GO:0019058	viral life cycle	10/293	261/28814	0.000367463259708491	0.00826037272851553	0.0061729588689314	Ctsl/Hsp90ab1/Ifi27/Ppia/Srpk2/Cdc42/Bsg/Slc3a2/Pkn2/4930486L24Rik	10
GO:0009566	GO:0009566	fertilization	9/293	215/28814	0.000379111621743143	0.00835719114505064	0.00624531106448828	H3f3a/Ybx3/Tcp1/H3f3b/Kmt2c/Mfge8/Dkkl1/Ppp3r2/Ccdc136	9
GO:0070301	GO:0070301	cellular response to hydrogen peroxide	6/293	93/28814	0.00038169407195892	0.00835719114505064	0.00624531106448828	Txn1/Psap/Rack1/Cfl1/Akr1b3/Hdac6	6
GO:0051497	GO:0051497	negative regulation of stress fiber assembly	4/293	34/28814	0.000381955719609262	0.00835719114505064	0.00624531106448828	Ppp1r9a/Pfn1/Tmsb15b2/Stmn1	4
GO:0055075	GO:0055075	potassium ion homeostasis	4/293	34/28814	0.000381955719609262	0.00835719114505064	0.00624531106448828	Atp1a1/Atp1b1/Atp1b3/Atp1a2	4
GO:0042596	GO:0042596	fear response	5/293	61/28814	0.000392462110741292	0.00845651395743798	0.00631953478970798	Dbi/Eif4e/Eif4g1/Gja1/Atp1a2	5
GO:0140115	GO:0140115	export across plasma membrane	5/293	61/28814	0.000392462110741292	0.00845651395743798	0.00631953478970798	Atp1a1/Atp1b1/Atp1b3/Gja1/Atp1a2	5
GO:0010631	GO:0010631	epithelial cell migration	11/293	313/28814	0.000394225056516761	0.00845651395743798	0.00631953478970798	Sparc/Hspb1/Macf1/Pfn1/Map4k4/Itgb1/Calr/Bsg/Hdac6/Pkn2/Csnk2b	11
GO:0090132	GO:0090132	epithelium migration	11/293	315/28814	0.000415860444654888	0.00886268817764509	0.00662306791555632	Sparc/Hspb1/Macf1/Pfn1/Map4k4/Itgb1/Calr/Bsg/Hdac6/Pkn2/Csnk2b	11
GO:1903522	GO:1903522	regulation of blood circulation	10/293	266/28814	0.000426456679546517	0.0088833476730007	0.00663850671223953	Tnni3/Calm1/Tpm1/Atp1a1/Atp1b1/Gja1/Atp5j/App/Thra/Atp1a2	10
GO:1903205	GO:1903205	regulation of hydrogen peroxide-induced cell death	4/293	35/28814	0.000427812588390993	0.0088833476730007	0.00663850671223953	Txn1/Psap/Rack1/Hdac6	4
GO:0006941	GO:0006941	striated muscle contraction	8/293	174/28814	0.000429095335938807	0.0088833476730007	0.00663850671223953	Tnni3/Calm1/Tpm1/Atp1a1/Atp1b1/Grcc10/Atp1a2/Pgam2	8
GO:0048102	GO:0048102	autophagic cell death	3/293	15/28814	0.000432516271475911	0.0088833476730007	0.00663850671223953	Calm1/Atp6v0c/Sh3glb1	3
GO:0110096	GO:0110096	cellular response to aldehyde	3/293	15/28814	0.000432516271475911	0.0088833476730007	0.00663850671223953	Aldh1a1/Akr1b3/Akr1a1	3
GO:0061041	GO:0061041	regulation of wound healing	7/293	133/28814	0.000437238321016721	0.0088833476730007	0.00663850671223953	Anxa2/Actg1/Acta2/Anxa5/Gja1/Itgb1/Prdx2	7
GO:0016358	GO:0016358	dendrite development	11/293	317/28814	0.000438483340349212	0.0088833476730007	0.00663850671223953	Ppp1r9a/Ppp3ca/Cdc42/Map1b/Itgb1/Cfl1/Sh3glb1/Hdac6/App/Dnm3/Lrp8	11
GO:0090130	GO:0090130	tissue migration	11/293	317/28814	0.000438483340349212	0.0088833476730007	0.00663850671223953	Sparc/Hspb1/Macf1/Pfn1/Map4k4/Itgb1/Calr/Bsg/Hdac6/Pkn2/Csnk2b	11
GO:0008217	GO:0008217	regulation of blood pressure	9/293	220/28814	0.000447990487369422	0.00899209018107711	0.00671976975589649	Tnni3/Tpm1/Atp1a1/Acta2/Gja1/Atp5j/Manf/Wnk1/Atp1a2	9
GO:0051402	GO:0051402	neuron apoptotic process	11/293	318/28814	0.000450176087885383	0.00899209018107711	0.00671976975589649	Mt3/Ppt1/Gapdh/Mt1/Hsp90ab1/Srpk2/Cdc42/Prdx2/App/Egln2/Chl1	11
GO:0007044	GO:0007044	cell-substrate junction assembly	6/293	96/28814	0.000452596067313862	0.00899209018107711	0.00671976975589649	S100a10/Actg1/Macf1/Map4k4/Cfl1/Sdc4	6
GO:2000112	GO:2000112	regulation of cellular macromolecule biosynthetic process	14/293	481/28814	0.00045481016759866	0.00899209018107711	0.00671976975589649	Dbi/Soat1/Vim/Mt3/Gapdh/Eif4e/Eif4g1/Rack1/Calr/App/Rbm3/Mex3d/Svip/Ybx2	14
GO:0090559	GO:0090559	regulation of membrane permeability	6/293	97/28814	0.000478378597660353	0.00940142848815136	0.00702566739709185	Chchd10/Mt3/Hk2/Laptm4b/Sh3glb1/Acaa2	6
GO:0051222	GO:0051222	positive regulation of protein transport	11/293	321/28814	0.000486833537193552	0.00951064088731689	0.00710728158935449	Oaz1/Hsp90ab1/Pdcd5/Ppia/Gja1/Cdc42/Rack1/Sh3glb1/Bsg/App/Chp2	11
GO:0003012	GO:0003012	muscle system process	13/293	430/28814	0.000507330363045335	0.00985241568943662	0.00736268916783326	Tnni3/Myl6/Calm1/Tpm1/Atp1a1/Acta2/Ppp3ca/Atp1b1/Tpm4/Fkbp1a/Grcc10/Atp1a2/Pgam2	13
GO:0046686	GO:0046686	response to cadmium ion	4/293	37/28814	0.000531087038542185	0.0102531038852674	0.00766212259940119	Mt3/Mt2/Mt1/Sord	4
GO:0033674	GO:0033674	positive regulation of kinase activity	13/293	435/28814	0.000564978131631835	0.0108436153685128	0.00810341056757264	Clu/Mif/Mt3/Ppp1r9a/Hsp90ab1/Ppia/Cdc42/Sh3glb1/Higd1a/Erp29/App/Sdc4/Lrp8	13
GO:1904062	GO:1904062	regulation of cation transmembrane transport	12/293	381/28814	0.000578730096774294	0.0110429777768211	0.00825239366881338	Dbi/Calm1/1810037I17Rik/Stim1/Atp1b1/Atp1b3/Itgb1/Fkbp1a/Cfl1/App/Wnk1/Atp1a2	12
GO:0016052	GO:0016052	carbohydrate catabolic process	7/293	140/28814	0.000594423997804547	0.0112762728468671	0.0084267345755798	Gm2a/Hk2/Gapdh/Pgam1/App/Pgam2/Sord	7
GO:0007163	GO:0007163	establishment or maintenance of cell polarity	9/293	229/28814	0.000597827993709588	0.0112762728468671	0.0084267345755798	Actb/Macf1/Syne2/Hsp90ab1/Gja1/Cdc42/Map1b/Itgb1/Cfl1	9
GO:0070997	GO:0070997	neuron death	13/293	438/28814	0.000602155926920376	0.0112930042980153	0.00843923795322993	Clu/Mt3/Ppt1/Gapdh/Mt1/Hsp90ab1/Srpk2/Cdc42/Rack1/Prdx2/App/Egln2/Chl1	13
GO:0150115	GO:0150115	cell-substrate junction organization	6/293	102/28814	0.000624919821699321	0.0116533344023703	0.00870851186937451	S100a10/Actg1/Macf1/Map4k4/Cfl1/Sdc4	6
GO:0019430	GO:0019430	removal of superoxide radicals	3/293	17/28814	0.000636733897400086	0.0117384455482027	0.0087721152465802	Mt3/Prdx1/Prdx2	3
GO:0098814	GO:0098814	spontaneous synaptic transmission	3/293	17/28814	0.000636733897400086	0.0117384455482027	0.0087721152465802	Ppp1r9a/Itgb1/App	3
GO:0030837	GO:0030837	negative regulation of actin filament polymerization	5/293	68/28814	0.000649063787251841	0.0117384455482027	0.0087721152465802	Tmsb4x/Tpm1/Pfn1/Cfl1/Tmsb15b2	5
GO:0032233	GO:0032233	positive regulation of actin filament bundle assembly	5/293	68/28814	0.000649063787251841	0.0117384455482027	0.0087721152465802	S100a10/Tpm1/Pfn1/Cdc42/Sdc4	5
GO:0033028	GO:0033028	myeloid cell apoptotic process	4/293	39/28814	0.000650943659284857	0.0117384455482027	0.0087721152465802	Mif/Tcp1/Selenos/Thra	4
GO:0036474	GO:0036474	cell death in response to hydrogen peroxide	4/293	39/28814	0.000650943659284857	0.0117384455482027	0.0087721152465802	Txn1/Psap/Rack1/Hdac6	4
GO:0043523	GO:0043523	regulation of neuron apoptotic process	10/293	283/28814	0.000689037298566979	0.0122838335370197	0.00917968252389615	Mt3/Ppt1/Mt1/Hsp90ab1/Srpk2/Cdc42/Prdx2/App/Egln2/Chl1	10
GO:0007033	GO:0007033	vacuole organization	8/293	187/28814	0.000689995302070649	0.0122838335370197	0.00917968252389615	Mt3/Map1lc3b/Ppt1/Laptm4b/Atp6v0c/Sh3glb1/Gabarapl1/Man2a1	8
GO:0006165	GO:0006165	nucleoside diphosphate phosphorylation	6/293	104/28814	0.000692415967199463	0.0122838335370197	0.00917968252389615	Hk2/Gapdh/Pgam1/App/Nme2/Pgam2	6
GO:1901214	GO:1901214	regulation of neuron death	12/293	392/28814	0.000741911274462091	0.0130911441009924	0.00978298398130545	Clu/Mt3/Ppt1/Mt1/Hsp90ab1/Srpk2/Cdc42/Rack1/Prdx2/App/Egln2/Chl1	12
GO:0016137	GO:0016137	glycoside metabolic process	3/293	18/28814	0.000758351678572196	0.0133096802624275	0.00994629558724018	Fuca1/Akr1b3/Akr1a1	3
GO:0031668	GO:0031668	cellular response to extracellular stimulus	9/293	237/28814	0.000763332808025886	0.013325841893303	0.00995837313941945	Nupr1l/Hspa5/Map1lc3b/Eif4g1/Pdia3/Sh3glb1/Tle5/Higd1a/Gabarapl1	9
GO:0010762	GO:0010762	regulation of fibroblast migration	4/293	41/28814	0.000788794945655503	0.0136615014146451	0.0102092107816553	Akap12/Acta2/Itgb1/Sdc4	4
GO:0055117	GO:0055117	regulation of cardiac muscle contraction	5/293	71/28814	0.00079088521291364	0.0136615014146451	0.0102092107816553	Tnni3/Calm1/Atp1a1/Atp1b1/Atp1a2	5
GO:0036503	GO:0036503	ERAD pathway	6/293	107/28814	0.000804080603235295	0.0137447528115533	0.0102714243724684	Hsp90b1/Hspa5/Selenos/Calr/Svip/Ube2j1	6
GO:0046939	GO:0046939	nucleotide phosphorylation	6/293	107/28814	0.000804080603235295	0.0137447528115533	0.0102714243724684	Hk2/Gapdh/Pgam1/App/Nme2/Pgam2	6
GO:0033555	GO:0033555	multicellular organismal response to stress	6/293	108/28814	0.000844230911457812	0.0143342377192854	0.0107119451829549	Dbi/Eif4e/Ppp3ca/Eif4g1/Gja1/Atp1a2	6
GO:0034767	GO:0034767	positive regulation of ion transmembrane transport	8/293	193/28814	0.000847301071767632	0.0143342377192854	0.0107119451829549	Dbi/Calm1/Stim1/Atp1b1/Atp1b3/Itgb1/Cfl1/Wnk1	8
GO:0010632	GO:0010632	regulation of epithelial cell migration	9/293	241/28814	0.00085909765791194	0.0144093521810395	0.0107680780595343	Sparc/Hspb1/Macf1/Pfn1/Map4k4/Calr/Bsg/Hdac6/Csnk2b	9
GO:0032527	GO:0032527	protein exit from endoplasmic reticulum	4/293	42/28814	0.000864912364309805	0.0144093521810395	0.0107680780595343	Selenos/Gcc2/Svip/Ube2j1	4
GO:1901031	GO:1901031	regulation of response to reactive oxygen species	4/293	42/28814	0.000864912364309805	0.0144093521810395	0.0107680780595343	Txn1/Psap/Rack1/Hdac6	4
GO:0071450	GO:0071450	cellular response to oxygen radical	3/293	19/28814	0.000893793789589481	0.0147408603891089	0.0110158134342422	Mt3/Prdx1/Prdx2	3
GO:0071451	GO:0071451	cellular response to superoxide	3/293	19/28814	0.000893793789589481	0.0147408603891089	0.0110158134342422	Mt3/Prdx1/Prdx2	3
GO:0016311	GO:0016311	dephosphorylation	11/293	347/28814	0.000922381368573081	0.0151362782582843	0.0113113083619752	Hsp90b1/Calm1/Ppp1r11/Pgp/Hsp90ab1/Ppp3ca/Bod1l/Ppia/Chp2/Csnk2b/Ppm1g	11
GO:0032781	GO:0032781	positive regulation of ATP-dependent activity	4/293	43/28814	0.000946061596195042	0.0154476326304086	0.0115439828181956	Tpm1/Atp1b1/Pfn1/Atp1b3	4
GO:0001558	GO:0001558	regulation of cell growth	13/293	461/28814	0.000962009893334761	0.0156302795540826	0.0116804744735278	Mt3/Macf1/Ppt1/H3f3a/Eif4g1/Gja1/Cdc42/Rack1/Map1b/Cfl1/Sh3glb1/H3f3b/Sema5b	13
GO:0006336	GO:0006336	DNA replication-independent chromatin assembly	3/293	20/28814	0.00104364572490588	0.0167085135080053	0.0124862364006711	H3f3a/H3f3b/Nasp	3
GO:0010310	GO:0010310	regulation of hydrogen peroxide metabolic process	3/293	20/28814	0.00104364572490588	0.0167085135080053	0.0124862364006711	Mt3/Cycs/Prdx2	3
GO:0010763	GO:0010763	positive regulation of fibroblast migration	3/293	20/28814	0.00104364572490588	0.0167085135080053	0.0124862364006711	Akap12/Acta2/Itgb1	3
GO:0031330	GO:0031330	negative regulation of cellular catabolic process	9/293	249/28814	0.00107997234022946	0.0172061612652092	0.0128581275050314	Dbi/Timp2/Anxa2/Mt3/Hsp90ab1/Laptm4b/Eif4g1/Svip/Ybx2	9
GO:1903362	GO:1903362	regulation of cellular protein catabolic process	9/293	250/28814	0.00111054650517813	0.0176077953139837	0.0131582677704808	Clu/Anxa2/Hsp90ab1/Laptm4b/Nfe2l1/Rack1/Psme1/Ube2k/Svip	9
GO:0010634	GO:0010634	positive regulation of epithelial cell migration	7/293	156/28814	0.00112306198870286	0.0176532013020206	0.0131921995682055	Sparc/Hspb1/Pfn1/Map4k4/Calr/Bsg/Hdac6	7
GO:0086009	GO:0086009	membrane repolarization	4/293	45/28814	0.00112416790741082	0.0176532013020206	0.0131921995682055	Atp1a1/Atp1b1/Atp1b3/Gja1	4
GO:0051048	GO:0051048	negative regulation of secretion	8/293	202/28814	0.00113601876048646	0.0177543503424598	0.0132677880297416	Anxa5/Inha/Ppp1r9a/Ppp3ca/Atp5j/Erp29/Wnk1/Tcp11	8
GO:0120034	GO:0120034	positive regulation of plasma membrane bounded cell projection assembly	6/293	115/28814	0.00117027697216128	0.0181504298154417	0.0135637773725839	Espn/Pfn1/Cdc42/Cdc42ep5/Cfl1/Dnm3	6
GO:0006575	GO:0006575	cellular modified amino acid metabolic process	8/293	203/28814	0.00117242264499502	0.0181504298154417	0.0135637773725839	Gstm1/Ctsl/Gsta4/Gstm2/Gamt/Nfe2l1/Clic1/Serinc3	8
GO:0045860	GO:0045860	positive regulation of protein kinase activity	11/293	358/28814	0.00118523642163257	0.0181773174570004	0.013583870449601	Clu/Mif/Mt3/Ppp1r9a/Hsp90ab1/Ppia/Higd1a/Erp29/App/Sdc4/Lrp8	11
GO:0045861	GO:0045861	negative regulation of proteolysis	11/293	358/28814	0.00118523642163257	0.0181773174570004	0.013583870449601	Timp2/Cst3/Mt3/Gapdh/Hsp90ab1/Cstdc1/Cst9/Serpinb6a/Hdac6/App/Svip	11
GO:0034724	GO:0034724	DNA replication-independent chromatin organization	3/293	21/28814	0.00120847094174343	0.0184474494455905	0.0137857395067917	H3f3a/H3f3b/Nasp	3
GO:0031669	GO:0031669	cellular response to nutrient levels	8/293	205/28814	0.00124802086586975	0.0187890113843327	0.0140409880129238	Nupr1l/Hspa5/Map1lc3b/Eif4g1/Pdia3/Sh3glb1/Higd1a/Gabarapl1	8
GO:0051495	GO:0051495	positive regulation of cytoskeleton organization	8/293	205/28814	0.00124802086586975	0.0187890113843327	0.0140409880129238	S100a10/Tpm1/Pfn1/Cdc42/Cdc42ep5/Map1b/Cfl1/Sdc4	8
GO:0120032	GO:0120032	regulation of plasma membrane bounded cell projection assembly	8/293	205/28814	0.00124802086586975	0.0187890113843327	0.0140409880129238	Espn/Syne2/Ppp1r9a/Pfn1/Cdc42/Cdc42ep5/Cfl1/Dnm3	8
GO:0000422	GO:0000422	autophagy of mitochondrion	5/293	79/28814	0.0012817535283019	0.0191214321813038	0.0142894053633657	Map1lc3b/Hk2/Hdac6/Gabarapl1/Spata18	5
GO:0061726	GO:0061726	mitochondrion disassembly	5/293	79/28814	0.0012817535283019	0.0191214321813038	0.0142894053633657	Map1lc3b/Hk2/Hdac6/Gabarapl1/Spata18	5
GO:0070839	GO:0070839	metal ion export	4/293	47/28814	0.00132453746783808	0.0196702804047266	0.0146995584666002	Atp1a1/Atp1b1/Atp1b3/Atp1a2	4
GO:0090150	GO:0090150	establishment of protein localization to membrane	9/293	257/28814	0.00134473287695972	0.0198802400999181	0.0148564608976584	Reep1/Hspa5/Macf1/Sys1/Pdcd5/Rack1/Emc7/Sh3glb1/Reep2	9
GO:0060491	GO:0060491	regulation of cell projection assembly	8/293	208/28814	0.00136864819110905	0.0201430644090579	0.0150528689416289	Espn/Syne2/Ppp1r9a/Pfn1/Cdc42/Cdc42ep5/Cfl1/Dnm3	8
GO:0000303	GO:0000303	response to superoxide	3/293	22/28814	0.00138881133198072	0.0203485660337532	0.0152064398661423	Mt3/Prdx1/Prdx2	3
GO:0030307	GO:0030307	positive regulation of cell growth	8/293	209/28814	0.00141085408156409	0.0205172859444367	0.0153325238944602	Macf1/H3f3a/Eif4g1/Cdc42/Map1b/Cfl1/Sh3glb1/H3f3b	8
GO:0051346	GO:0051346	negative regulation of hydrolase activity	11/293	366/28814	0.00141282956229211	0.0205172859444367	0.0153325238944602	Timp2/Cst3/Mt3/Ppp1r11/Gapdh/Bod1l/Cstdc1/Cst9/Serpinb6a/App/Wnk1	11
GO:0006749	GO:0006749	glutathione metabolic process	5/293	81/28814	0.00143338147316722	0.0205430480128158	0.0153517758330481	Gstm1/Gsta4/Gstm2/Nfe2l1/Clic1	5
GO:0034308	GO:0034308	primary alcohol metabolic process	5/293	81/28814	0.00143338147316722	0.0205430480128158	0.0153517758330481	Aldh1a1/Dhrs7/Rbp1/Akr1b3/Akr1a1	5
GO:1901880	GO:1901880	negative regulation of protein depolymerization	5/293	81/28814	0.00143338147316722	0.0205430480128158	0.0153517758330481	Tpm1/Map1b/Cfl1/Hdac6/Lima1	5
GO:0008637	GO:0008637	apoptotic mitochondrial changes	6/293	120/28814	0.00145663508674764	0.0206955686350899	0.0154657541677922	Chchd10/Hk2/Pdcd5/Sh3glb1/Higd1a/Acaa2	6
GO:0018107	GO:0018107	peptidyl-threonine phosphorylation	6/293	120/28814	0.00145663508674764	0.0206955686350899	0.0154657541677922	H3f3a/Eif4g1/Ube2k/App/Wnk1/Csnk2b	6
GO:0072594	GO:0072594	establishment of protein localization to organelle	12/293	426/28814	0.00150747303938203	0.0213255453243613	0.0159365344000006	Clu/Hspa5/Macf1/Hk2/Hsp90ab1/Ppp3ca/Tcp1/Pdcd5/Cfl1/Sh3glb1/Gcc2/Chp2	12
GO:1990778	GO:1990778	protein localization to cell periphery	11/293	370/28814	0.00153940257088932	0.021587493714563	0.0161322878716225	S100a10/Actb/Anxa2/Macf1/Myl12a/Atp1b1/Sys1/Atp1b3/Rack1/Itgb1/Bsg	11
GO:0050807	GO:0050807	regulation of synapse organization	9/293	263/28814	0.00157575879932503	0.021587493714563	0.0161322878716225	Malat1/Sparc/Ppp1r9a/Eif4g1/Cdc42/Cfl1/App/Dnm3/Lrp8	9
GO:0000305	GO:0000305	response to oxygen radical	3/293	23/28814	0.00158518768592616	0.021587493714563	0.0161322878716225	Mt3/Prdx1/Prdx2	3
GO:0019400	GO:0019400	alditol metabolic process	3/293	23/28814	0.00158518768592616	0.021587493714563	0.0161322878716225	Pgp/Akr1b3/Sord	3
GO:0043968	GO:0043968	histone H2A acetylation	3/293	23/28814	0.00158518768592616	0.021587493714563	0.0161322878716225	Actb/Morf4l2/Trrap	3
GO:0070861	GO:0070861	regulation of protein exit from endoplasmic reticulum	3/293	23/28814	0.00158518768592616	0.021587493714563	0.0161322878716225	Gcc2/Svip/Ube2j1	3
GO:0099170	GO:0099170	postsynaptic modulation of chemical synaptic transmission	3/293	23/28814	0.00158518768592616	0.021587493714563	0.0161322878716225	Eif4e/Ppp3ca/Csnk2b	3
GO:1901028	GO:1901028	regulation of mitochondrial outer membrane permeabilization involved in apoptotic signaling pathway	3/293	23/28814	0.00158518768592616	0.021587493714563	0.0161322878716225	Chchd10/Sh3glb1/Acaa2	3
GO:1902307	GO:1902307	positive regulation of sodium ion transmembrane transport	3/293	23/28814	0.00158518768592616	0.021587493714563	0.0161322878716225	Atp1b1/Atp1b3/Wnk1	3
GO:0033135	GO:0033135	regulation of peptidyl-serine phosphorylation	7/293	166/28814	0.00160605223795698	0.0217812539048546	0.0162770844473239	Mif/Txn1/Hsp90ab1/Eif4g1/Rack1/Hdac6/App	7
GO:0042542	GO:0042542	response to hydrogen peroxide	6/293	123/28814	0.00165235296205121	0.0223169646973336	0.0166774199765186	Txn1/Psap/Rack1/Cfl1/Akr1b3/Hdac6	6
GO:0042060	GO:0042060	wound healing	11/293	374/28814	0.00167511740839292	0.0225317021899408	0.0168378928453646	Anxa2/Actg1/Tpm1/Macf1/Acta2/Anxa5/Ppia/Gja1/Itgb1/Prdx2/Sdc4	11
GO:0031345	GO:0031345	negative regulation of cell projection organization	8/293	215/28814	0.00168629134297866	0.022589421174106	0.0168810261187553	Vim/Mt3/Ppp3ca/Itgb1/Cfl1/App/Sema5b/Dnm3	8
GO:0006898	GO:0006898	receptor-mediated endocytosis	9/293	266/28814	0.00170266338226403	0.0227160212219128	0.0169756340636508	Clu/Ctsl/Anxa2/Ppt1/Itgb1/App/Dnm3/4930486L24Rik/Mrc1	9
GO:0071248	GO:0071248	cellular response to metal ion	7/293	169/28814	0.00177859826826848	0.0236330344795836	0.017660916109378	Mt3/Mt2/Mt1/Nfe2l1/Jund/Chp2/Wnk1	7
GO:0051261	GO:0051261	protein depolymerization	6/293	125/28814	0.00179351374215403	0.0237002597833903	0.0177111534351003	Tpm1/Map1b/Cfl1/Stmn1/Hdac6/Lima1	6
GO:0032780	GO:0032780	negative regulation of ATP-dependent activity	3/293	24/28814	0.00179810014809999	0.0237002597833903	0.0177111534351003	Tnni3/1810037I17Rik/Cnn3	3
GO:0016570	GO:0016570	histone modification	13/293	495/28814	0.00181173132640228	0.0237844088530092	0.0177740378548098	Actb/Mt3/Ube2n/H3f3a/Sin3b/Ncor2/Gatad2a/Hdac6/Morf4l2/Kmt2c/Kansl3/Trrap/App	13
GO:1904064	GO:1904064	positive regulation of cation transmembrane transport	7/293	170/28814	0.00183920101976708	0.0240488356449225	0.0179716434307289	Dbi/Calm1/Stim1/Atp1b1/Atp1b3/Cfl1/Wnk1	7
GO:0032414	GO:0032414	positive regulation of ion transmembrane transporter activity	6/293	126/28814	0.0018674313680125	0.0243210704357819	0.0181750839075569	Calm1/Stim1/Atp1b1/Atp1b3/Cfl1/Wnk1	6
GO:0034765	GO:0034765	regulation of ion transmembrane transport	13/293	498/28814	0.00190982394973995	0.0247748703677728	0.0185142076259375	Dbi/Calm1/1810037I17Rik/Stim1/Atp1b1/Atp1b3/Itgb1/Fkbp1a/Cfl1/Clic1/App/Wnk1/Atp1a2	13
GO:0050803	GO:0050803	regulation of synapse structure or activity	9/293	271/28814	0.00193227208738741	0.0249673897275806	0.0186580769316729	Malat1/Sparc/Ppp1r9a/Eif4g1/Cdc42/Cfl1/App/Dnm3/Lrp8	9
GO:0044403	GO:0044403	biological process involved in symbiotic interaction	9/293	272/28814	0.00198103053621713	0.0254970283131946	0.0190538747136674	Ctsl/Gapdh/Hsp90ab1/Tcp1/Ifi27/Cfl1/Bsg/Slc3a2/4930486L24Rik	9
GO:0018210	GO:0018210	peptidyl-threonine modification	6/293	128/28814	0.00202216485294293	0.0258319001705158	0.0193041237362654	H3f3a/Eif4g1/Ube2k/App/Wnk1/Csnk2b	6
GO:0060547	GO:0060547	negative regulation of necrotic cell death	3/293	25/28814	0.00202802866514647	0.0258319001705158	0.0193041237362654	Mt3/Fth1/Ybx3	3
GO:1903531	GO:1903531	negative regulation of secretion by cell	7/293	173/28814	0.00203066125654877	0.0258319001705158	0.0193041237362654	Anxa5/Inha/Ppp1r9a/Ppp3ca/Atp5j/Erp29/Tcp11	7
GO:0052547	GO:0052547	regulation of peptidase activity	12/293	443/28814	0.00208518485120219	0.0262444070046942	0.0196123892109873	Timp2/Cst3/Mt3/Gapdh/Cstdc1/Cst9/Serpinb6a/Pdcd5/Rack1/Psme1/Cycs/App	12
GO:1903034	GO:1903034	regulation of response to wounding	7/293	174/28814	0.00209779276220309	0.0262444070046942	0.0196123892109873	Anxa2/Actg1/Acta2/Anxa5/Gja1/Itgb1/Prdx2	7
GO:1903169	GO:1903169	regulation of calcium ion transmembrane transport	7/293	174/28814	0.00209779276220309	0.0262444070046942	0.0196123892109873	Dbi/Calm1/1810037I17Rik/Stim1/Atp1b1/Fkbp1a/Atp1a2	7
GO:0001952	GO:0001952	regulation of cell-matrix adhesion	6/293	129/28814	0.00210307100616532	0.0262444070046942	0.0196123892109873	S100a10/Actg1/Macf1/Map4k4/Cfl1/Sdc4	6
GO:0030048	GO:0030048	actin filament-based movement	6/293	129/28814	0.00210307100616532	0.0262444070046942	0.0196123892109873	Myl6/Tpm1/Atp1a1/Acta2/Syne2/Atp1a2	6
GO:0009132	GO:0009132	nucleoside diphosphate metabolic process	6/293	130/28814	0.00218639737915952	0.0269589211345474	0.0201463440916949	Hk2/Gapdh/Pgam1/App/Nme2/Pgam2	6
GO:0033138	GO:0033138	positive regulation of peptidyl-serine phosphorylation	6/293	130/28814	0.00218639737915952	0.0269589211345474	0.0201463440916949	Mif/Txn1/Hsp90ab1/Eif4g1/Hdac6/App	6
GO:0060996	GO:0060996	dendritic spine development	6/293	130/28814	0.00218639737915952	0.0269589211345474	0.0201463440916949	Ppp1r9a/Cdc42/Cfl1/Hdac6/Dnm3/Lrp8	6
GO:0010959	GO:0010959	regulation of metal ion transport	12/293	446/28814	0.00220384400282802	0.0269589211345474	0.0201463440916949	Dbi/Calm1/1810037I17Rik/Atp1a1/Stim1/Atp1b1/Atp1b3/Gja1/Itgb1/Fkbp1a/Wnk1/Atp1a2	12
GO:0007617	GO:0007617	mating behavior	4/293	54/28814	0.00222155297835407	0.0269589211345474	0.0201463440916949	Aplp2/Ncoa2/App/Thra	4
GO:0048588	GO:0048588	developmental cell growth	9/293	277/28814	0.00223976836290755	0.0269589211345474	0.0201463440916949	Mt3/Macf1/Hsp90ab1/Map1b/Itgb1/Sh3glb1/Hdac6/App/Sema5b	9
GO:0030970	GO:0030970	retrograde protein transport, ER to cytosol	3/293	26/28814	0.00227543342599669	0.0269589211345474	0.0201463440916949	Selenos/Svip/Ube2j1	3
GO:0071276	GO:0071276	cellular response to cadmium ion	3/293	26/28814	0.00227543342599669	0.0269589211345474	0.0201463440916949	Mt3/Mt2/Mt1	3
GO:0099010	GO:0099010	modification of postsynaptic structure	3/293	26/28814	0.00227543342599669	0.0269589211345474	0.0201463440916949	Pfn1/Cdc42/Cfl1	3
GO:1901032	GO:1901032	negative regulation of response to reactive oxygen species	3/293	26/28814	0.00227543342599669	0.0269589211345474	0.0201463440916949	Txn1/Psap/Rack1	3
GO:1902230	GO:1902230	negative regulation of intrinsic apoptotic signaling pathway in response to DNA damage	3/293	26/28814	0.00227543342599669	0.0269589211345474	0.0201463440916949	Clu/Mif/Tpt1	3
GO:1903206	GO:1903206	negative regulation of hydrogen peroxide-induced cell death	3/293	26/28814	0.00227543342599669	0.0269589211345474	0.0201463440916949	Txn1/Psap/Rack1	3
GO:1903513	GO:1903513	endoplasmic reticulum to cytosol transport	3/293	26/28814	0.00227543342599669	0.0269589211345474	0.0201463440916949	Selenos/Svip/Ube2j1	3
GO:0006096	GO:0006096	glycolytic process	5/293	90/28814	0.00228354054704576	0.0269589211345474	0.0201463440916949	Hk2/Gapdh/Pgam1/App/Pgam2	5
GO:0046364	GO:0046364	monosaccharide biosynthetic process	5/293	90/28814	0.00228354054704576	0.0269589211345474	0.0201463440916949	Pgp/Gapdh/Akr1a1/Pgam2/Sord	5
GO:0060048	GO:0060048	cardiac muscle contraction	6/293	132/28814	0.0023604940412533	0.0277612542325868	0.0207459258994603	Tnni3/Calm1/Tpm1/Atp1a1/Atp1b1/Atp1a2	6
GO:0045777	GO:0045777	positive regulation of blood pressure	4/293	55/28814	0.00237687764757979	0.0277612542325868	0.0207459258994603	Tpm1/Atp5j/Manf/Wnk1	4
GO:0051205	GO:0051205	protein insertion into membrane	4/293	55/28814	0.00237687764757979	0.0277612542325868	0.0207459258994603	Reep1/Pdcd5/Emc7/Sh3glb1	4
GO:0006757	GO:0006757	ATP generation from ADP	5/293	91/28814	0.0023965676453061	0.0277934099360233	0.020769955787849	Hk2/Gapdh/Pgam1/App/Pgam2	5
GO:0043242	GO:0043242	negative regulation of protein-containing complex disassembly	5/293	91/28814	0.0023965676453061	0.0277934099360233	0.020769955787849	Tpm1/Map1b/Cfl1/Hdac6/Lima1	5
GO:0061001	GO:0061001	regulation of dendritic spine morphogenesis	4/293	56/28814	0.00253951244371525	0.02920318508633	0.021823477741797	Ppp1r9a/Cfl1/Dnm3/Lrp8	4
GO:0070841	GO:0070841	inclusion body assembly	3/293	27/28814	0.00254075529440026	0.02920318508633	0.021823477741797	Clu/Psap/Hdac6	3
GO:0032411	GO:0032411	positive regulation of transporter activity	6/293	134/28814	0.00254482356328165	0.02920318508633	0.021823477741797	Calm1/Stim1/Atp1b1/Atp1b3/Cfl1/Wnk1	6
GO:0050767	GO:0050767	regulation of neurogenesis	12/293	455/28814	0.00259337720453855	0.029656668938312	0.0221623652542631	S100a10/Anxa2/Vim/Mt3/Macf1/Ppp3ca/Map1b/Hmgb2/Sh3glb1/Sema5b/Lrp8/Man2a1	12
GO:0035601	GO:0035601	protein deacylation	6/293	135/28814	0.0026409417890361	0.0299915949882923	0.0224126547749194	Ppt1/Sin3b/Ncor2/Gatad2a/Hdac6/Morf4l2	6
GO:0098732	GO:0098732	macromolecule deacylation	6/293	135/28814	0.0026409417890361	0.0299915949882923	0.0224126547749194	Ppt1/Sin3b/Ncor2/Gatad2a/Hdac6/Morf4l2	6
GO:0000910	GO:0000910	cytokinesis	7/293	182/28814	0.00269860135131864	0.0305407228794062	0.0228230168732212	Calm1/Son/Cdc42/Cfl1/Sh3glb1/Stmn1/Pkn2	7
GO:0051489	GO:0051489	regulation of filopodium assembly	4/293	57/28814	0.00270962609256774	0.0305601128378259	0.0228375069476681	Espn/Ppp1r9a/Cdc42/Dnm3	4
GO:0032273	GO:0032273	positive regulation of protein polymerization	5/293	94/28814	0.00276004357214609	0.0310221335746009	0.0231827740558774	Pfn1/Cdc42ep5/Map1b/Tppp3/Tppp2	5
GO:0006882	GO:0006882	cellular zinc ion homeostasis	3/293	28/28814	0.00282441623394271	0.0315297077544217	0.0235620831546241	Mt3/Mt2/Mt1	3
GO:0045070	GO:0045070	positive regulation of viral genome replication	3/293	28/28814	0.00282441623394271	0.0315297077544217	0.0235620831546241	Ppia/Srpk2/Pkn2	3
GO:0061136	GO:0061136	regulation of proteasomal protein catabolic process	7/293	184/28814	0.00286759263908177	0.0318244589004628	0.0237823500555112	Clu/Hsp90ab1/Nfe2l1/Rack1/Psme1/Ube2k/Svip	7
GO:0001523	GO:0001523	retinoid metabolic process	4/293	58/28814	0.00288738592641519	0.0318244589004628	0.0237823500555112	Aldh1a1/Dhrs7/Rbp1/Akr1b3	4
GO:1904591	GO:1904591	positive regulation of protein import	4/293	58/28814	0.00288738592641519	0.0318244589004628	0.0237823500555112	Hsp90ab1/Pdcd5/App/Chp2	4
GO:1901879	GO:1901879	regulation of protein depolymerization	5/293	95/28814	0.00288960656683057	0.0318244589004628	0.0237823500555112	Tpm1/Map1b/Cfl1/Hdac6/Lima1	5
GO:0032680	GO:0032680	regulation of tumor necrosis factor production	7/293	185/28814	0.00295507114401821	0.0324366003166146	0.0242398020262715	Clu/Mif/Akap12/Hspb1/Selenos/App/Ube2j1	7
GO:0046902	GO:0046902	regulation of mitochondrial membrane permeability	4/293	59/28814	0.00307295780581924	0.0336181583956625	0.0251227778510836	Chchd10/Hk2/Sh3glb1/Acaa2	4
GO:0042572	GO:0042572	retinol metabolic process	3/293	29/28814	0.00312681972566363	0.0338136273711844	0.0252688513983321	Aldh1a1/Dhrs7/Rbp1	3
GO:0055069	GO:0055069	zinc ion homeostasis	3/293	29/28814	0.00312681972566363	0.0338136273711844	0.0252688513983321	Mt3/Mt2/Mt1	3
GO:1902235	GO:1902235	regulation of endoplasmic reticulum stress-induced intrinsic apoptotic signaling pathway	3/293	29/28814	0.00312681972566363	0.0338136273711844	0.0252688513983321	Selenos/Erp29/Serinc3	3
GO:0032388	GO:0032388	positive regulation of intracellular transport	7/293	187/28814	0.00313614582976679	0.0338136273711844	0.0252688513983321	Anxa2/Oaz1/Hsp90ab1/Pdcd5/Cdc42/Sh3glb1/Chp2	7
GO:0009991	GO:0009991	response to extracellular stimulus	11/293	406/28814	0.00315139116422276	0.0338136273711844	0.0252688513983321	Nupr1l/Hspa5/Mt3/Map1lc3b/Eif4g1/Pdia3/Rbp1/Sh3glb1/Tle5/Higd1a/Gabarapl1	11
GO:0002028	GO:0002028	regulation of sodium ion transport	5/293	97/28814	0.00316183050594166	0.0338136273711844	0.0252688513983321	Atp1a1/Atp1b1/Atp1b3/Wnk1/Atp1a2	5
GO:0035966	GO:0035966	response to topologically incorrect protein	6/293	140/28814	0.00316294442503157	0.0338136273711844	0.0252688513983321	Clu/Hspa5/Hspb1/Selenos/Hdac6/Manf	6
GO:1903555	GO:1903555	regulation of tumor necrosis factor superfamily cytokine production	7/293	188/28814	0.00322980320355505	0.0344162795911288	0.0257192121130665	Clu/Mif/Akap12/Hspb1/Selenos/App/Ube2j1	7
GO:0016101	GO:0016101	diterpenoid metabolic process	4/293	60/28814	0.00326650604465213	0.034571366892556	0.0258351085216509	Aldh1a1/Dhrs7/Rbp1/Akr1b3	4
GO:0055078	GO:0055078	sodium ion homeostasis	4/293	60/28814	0.00326650604465213	0.034571366892556	0.0258351085216509	Atp1a1/Atp1b1/Atp1b3/Atp1a2	4
GO:0051224	GO:0051224	negative regulation of protein transport	6/293	141/28814	0.00327595828872179	0.034571366892556	0.0258351085216509	Anxa5/Txn1/Ppp3ca/Erp29/Svip/Ube2j1	6
GO:0070252	GO:0070252	actin-mediated cell contraction	5/293	98/28814	0.0033046552279892	0.0347624309559634	0.0259778902874995	Myl6/Tpm1/Atp1a1/Acta2/Atp1a2	5
GO:0098657	GO:0098657	import into cell	8/293	240/28814	0.0033217465352091	0.0348305818803714	0.0260288193275171	Actb/Atp1a1/Atp1b1/Atp1b3/Itgb1/Slc3a2/Wnk1/Atp1a2	8
GO:0048675	GO:0048675	axon extension	6/293	142/28814	0.00339195428269699	0.0354534839357055	0.0264943127009185	Mt3/Macf1/Hsp90ab1/Map1b/Itgb1/Sema5b	6
GO:0034508	GO:0034508	centromere complex assembly	3/293	30/28814	0.00344835117838919	0.0356279080653284	0.0266246594798471	H3f3a/H3f3b/Nasp	3
GO:0071353	GO:0071353	cellular response to interleukin-4	3/293	30/28814	0.00344835117838919	0.0356279080653284	0.0266246594798471	Hspa5/Hsp90ab1/Mrc1	3
GO:1903523	GO:1903523	negative regulation of blood circulation	3/293	30/28814	0.00344835117838919	0.0356279080653284	0.0266246594798471	Atp1a1/App/Atp1a2	3
GO:0046031	GO:0046031	ADP metabolic process	5/293	99/28814	0.00345206421839562	0.0356279080653284	0.0266246594798471	Hk2/Gapdh/Pgam1/App/Pgam2	5
GO:0032640	GO:0032640	tumor necrosis factor production	7/293	191/28814	0.00352362532614937	0.0361391822513194	0.0270067335852895	Clu/Mif/Akap12/Hspb1/Selenos/App/Ube2j1	7
GO:0098739	GO:0098739	import across plasma membrane	7/293	191/28814	0.00352362532614937	0.0361391822513194	0.0270067335852895	Atp1a1/Atp1b1/Atp1b3/Itgb1/Slc3a2/Wnk1/Atp1a2	7
GO:0016575	GO:0016575	histone deacetylation	5/293	100/28814	0.0036041391990707	0.0368497970447042	0.0275377745001959	Sin3b/Ncor2/Gatad2a/Hdac6/Morf4l2	5
GO:0051054	GO:0051054	positive regulation of DNA metabolic process	9/293	299/28814	0.00371470386924196	0.0378622922324599	0.0282944099880149	Actb/Cst3/Ube2n/Hsp90ab1/Tcp1/Pfn1/Cdc42/Morf4l2/Trrap	9
GO:0008203	GO:0008203	cholesterol metabolic process	6/293	145/28814	0.00375831389588515	0.0379837930290589	0.0283852072733914	Soat1/Mt3/Aplp2/Nfe2l1/Lima1/App	6
GO:0090316	GO:0090316	positive regulation of intracellular protein transport	6/293	145/28814	0.00375831389588515	0.0379837930290589	0.0283852072733914	Oaz1/Hsp90ab1/Pdcd5/Cdc42/Sh3glb1/Chp2	6
GO:0072593	GO:0072593	reactive oxygen species metabolic process	8/293	245/28814	0.00376134452603417	0.0379837930290589	0.0283852072733914	Mt3/Hk2/Prdx1/Cycs/Prdx6/Prdx2/App/Prdx6b	8
GO:0043552	GO:0043552	positive regulation of phosphatidylinositol 3-kinase activity	3/293	31/28814	0.00378937833189073	0.0381034678915928	0.0284746400421474	Cdc42/Sh3glb1/App	3
GO:0070588	GO:0070588	calcium ion transmembrane transport	9/293	300/28814	0.00379641499102707	0.0381034678915928	0.0284746400421474	Dbi/Calm1/1810037I17Rik/Stim1/Atp1b1/Fkbp1a/Tmco1/Itpr2/Atp1a2	9
GO:0071706	GO:0071706	tumor necrosis factor superfamily cytokine production	7/293	194/28814	0.00383737544816522	0.0383971531124337	0.0286941103794126	Clu/Mif/Akap12/Hspb1/Selenos/App/Ube2j1	7
GO:1904950	GO:1904950	negative regulation of establishment of protein localization	6/293	146/28814	0.00388671776219332	0.0386366496213406	0.0288730856081733	Anxa5/Txn1/Ppp3ca/Erp29/Svip/Ube2j1	6
GO:0035306	GO:0035306	positive regulation of dephosphorylation	4/293	63/28814	0.00389662736887987	0.0386366496213406	0.0288730856081733	Calm1/Hsp90ab1/Ppia/Chp2	4
GO:0048260	GO:0048260	positive regulation of receptor-mediated endocytosis	4/293	63/28814	0.00389662736887987	0.0386366496213406	0.0288730856081733	Clu/Anxa2/Ppt1/App	4
GO:1901136	GO:1901136	carbohydrate derivative catabolic process	6/293	147/28814	0.00401834390104065	0.0397235080819741	0.0296852926107315	Ctsl/Aldh1a1/Gm2a/Psap/Fuca1/Nudt4	6
GO:0007286	GO:0007286	spermatid development	8/293	248/28814	0.00404590760752834	0.03987588218591	0.0297991614526349	Rsph1/Hmgb2/H3f3b/Ube2j1/Tssk2/Ybx2/Tcp11/Ccdc136	8
GO:0009135	GO:0009135	purine nucleoside diphosphate metabolic process	5/293	103/28814	0.00408917544584896	0.0400617128754516	0.0299380323293891	Hk2/Gapdh/Pgam1/App/Pgam2	5
GO:0009179	GO:0009179	purine ribonucleoside diphosphate metabolic process	5/293	103/28814	0.00408917544584896	0.0400617128754516	0.0299380323293891	Hk2/Gapdh/Pgam1/App/Pgam2	5
GO:0070059	GO:0070059	intrinsic apoptotic signaling pathway in response to endoplasmic reticulum stress	4/293	64/28814	0.00412369079981982	0.0402796226339543	0.0301008758257524	Selenos/Ube2k/Erp29/Serinc3	4
GO:0070670	GO:0070670	response to interleukin-4	3/293	32/28814	0.00415025165297979	0.0402991891274546	0.0301154978244874	Hspa5/Hsp90ab1/Mrc1	3
GO:1902883	GO:1902883	negative regulation of response to oxidative stress	3/293	32/28814	0.00415025165297979	0.0402991891274546	0.0301154978244874	Txn1/Psap/Rack1	3
GO:0010770	GO:0010770	positive regulation of cell morphogenesis involved in differentiation	5/293	104/28814	0.00426072895487167	0.0410863269065755	0.0307037242029317	S100a10/Cdc42/Calr/Sh3glb1/Lrp8	5
GO:0001954	GO:0001954	positive regulation of cell-matrix adhesion	4/293	65/28814	0.00435952655047461	0.0410863269065755	0.0307037242029317	S100a10/Map4k4/Cfl1/Sdc4	4
GO:2000781	GO:2000781	positive regulation of double-strand break repair	4/293	65/28814	0.00435952655047461	0.0410863269065755	0.0307037242029317	Actb/Ube2n/Morf4l2/Trrap	4
GO:0030049	GO:0030049	muscle filament sliding	2/293	10/28814	0.00439405872766849	0.0410863269065755	0.0307037242029317	Myl6/Tpm1	2
GO:0032594	GO:0032594	protein transport within lipid bilayer	2/293	10/28814	0.00439405872766849	0.0410863269065755	0.0307037242029317	Itgb1/Reep2	2
GO:0051823	GO:0051823	regulation of synapse structural plasticity	2/293	10/28814	0.00439405872766849	0.0410863269065755	0.0307037242029317	Ppp1r9a/Cdc42	2
GO:0070862	GO:0070862	negative regulation of protein exit from endoplasmic reticulum	2/293	10/28814	0.00439405872766849	0.0410863269065755	0.0307037242029317	Svip/Ube2j1	2
GO:0071895	GO:0071895	odontoblast differentiation	2/293	10/28814	0.00439405872766849	0.0410863269065755	0.0307037242029317	Nfe2l1/Map1b	2
GO:0090237	GO:0090237	regulation of arachidonic acid secretion	2/293	10/28814	0.00439405872766849	0.0410863269065755	0.0307037242029317	Mif/Atp5j	2
GO:0110095	GO:0110095	cellular detoxification of aldehyde	2/293	10/28814	0.00439405872766849	0.0410863269065755	0.0307037242029317	Aldh1a1/Akr1a1	2
GO:1903749	GO:1903749	positive regulation of establishment of protein localization to mitochondrion	2/293	10/28814	0.00439405872766849	0.0410863269065755	0.0307037242029317	Pdcd5/Sh3glb1	2
GO:1903799	GO:1903799	negative regulation of production of miRNAs involved in gene silencing by miRNA	2/293	10/28814	0.00439405872766849	0.0410863269065755	0.0307037242029317	Ppp3ca/Ncor2	2
GO:2000109	GO:2000109	regulation of macrophage apoptotic process	2/293	10/28814	0.00439405872766849	0.0410863269065755	0.0307037242029317	Tcp1/Selenos	2
GO:0050684	GO:0050684	regulation of mRNA processing	6/293	150/28814	0.00443303896947619	0.041333050846082	0.0308881004751182	Malat1/Son/Srpk2/Prdx6/Rbm3/Prdx6b	6
GO:1903311	GO:1903311	regulation of mRNA metabolic process	9/293	308/28814	0.00450197668915949	0.0417745564783603	0.0312180366896243	Malat1/Vim/Son/Srpk2/Prdx6/Rbm3/Mex3d/Ybx2/Prdx6b	9
GO:0007018	GO:0007018	microtubule-based movement	11/293	426/28814	0.00451226969028519	0.0417745564783603	0.0312180366896243	Hspb1/Syne2/Anxa5/Cdc42/Map1b/Hdac6/Dynlrb1/Kif21a/App/Tppp2/Sord	11
GO:0048026	GO:0048026	positive regulation of mRNA splicing, via spliceosome	3/293	33/28814	0.00453130472464847	0.0417745564783603	0.0312180366896243	Prdx6/Rbm3/Prdx6b	3
GO:0097345	GO:0097345	mitochondrial outer membrane permeabilization	3/293	33/28814	0.00453130472464847	0.0417745564783603	0.0312180366896243	Chchd10/Sh3glb1/Acaa2	3
GO:0034764	GO:0034764	positive regulation of transmembrane transport	8/293	253/28814	0.00455677500959977	0.0418916963067407	0.0313055750327804	Dbi/Calm1/Stim1/Atp1b1/Atp1b3/Itgb1/Cfl1/Wnk1	8
GO:0022411	GO:0022411	cellular component disassembly	11/293	427/28814	0.0045909341721435	0.0420251853678922	0.031405331122611	Map1lc3b/Tpm1/Hk2/Map4k4/Map1b/Cfl1/Stmn1/Hdac6/Gabarapl1/Lima1/Spata18	11
GO:0019932	GO:0019932	second-messenger-mediated signaling	9/293	309/28814	0.00459690479801137	0.0420251853678922	0.031405331122611	Tnni3/Mt2/Gapdh/Ppp1r9a/Mt1/Ppp3ca/Atp1b1/App/Chp2	9
GO:0007006	GO:0007006	mitochondrial membrane organization	5/293	107/28814	0.00480614622179025	0.0438032269021549	0.0327340577574716	Chchd10/Hk2/Pdcd5/Sh3glb1/Acaa2	5
GO:0043161	GO:0043161	proteasome-mediated ubiquitin-dependent protein catabolic process	11/293	430/28814	0.00483348683471955	0.0438032269021549	0.0327340577574716	Clu/Hsp90b1/Hspa5/Hsp90ab1/Ifi27/Selenos/Rack1/Calr/Ube2k/Svip/Ube2j1	11
GO:0006721	GO:0006721	terpenoid metabolic process	4/293	67/28814	0.00485812754185995	0.0438032269021549	0.0327340577574716	Aldh1a1/Dhrs7/Rbp1/Akr1b3	4
GO:0032387	GO:0032387	negative regulation of intracellular transport	4/293	67/28814	0.00485812754185995	0.0438032269021549	0.0327340577574716	Txn1/Map1b/Svip/Ube2j1	4
GO:1902305	GO:1902305	regulation of sodium ion transmembrane transport	4/293	67/28814	0.00485812754185995	0.0438032269021549	0.0327340577574716	Atp1b1/Atp1b3/Wnk1/Atp1a2	4
GO:0030010	GO:0030010	establishment of cell polarity	6/293	153/28814	0.0048784753010013	0.0438661806517432	0.0327811029598646	Hsp90ab1/Gja1/Cdc42/Map1b/Itgb1/Cfl1	6
GO:0099563	GO:0099563	modification of synaptic structure	3/293	34/28814	0.00493285462836194	0.0441134302187572	0.0329658720323629	Pfn1/Cdc42/Cfl1	3
GO:1901020	GO:1901020	negative regulation of calcium ion transmembrane transporter activity	3/293	34/28814	0.00493285462836194	0.0441134302187572	0.0329658720323629	Calm1/1810037I17Rik/Atp1a2	3
GO:0048515	GO:0048515	spermatid differentiation	8/293	257/28814	0.00500002621421434	0.0445926250952485	0.0333239733384423	Rsph1/Hmgb2/H3f3b/Ube2j1/Tssk2/Ybx2/Tcp11/Ccdc136	8
GO:0016125	GO:0016125	sterol metabolic process	6/293	154/28814	0.00503401157770129	0.0446890133030779	0.0333960040399536	Soat1/Mt3/Aplp2/Nfe2l1/Lima1/App	6
GO:1990138	GO:1990138	neuron projection extension	7/293	204/28814	0.00503806670388142	0.0446890133030779	0.0333960040399536	Mt3/Macf1/Hsp90ab1/Map1b/Itgb1/Sh3glb1/Sema5b	7
GO:0006801	GO:0006801	superoxide metabolic process	4/293	68/28814	0.00512119402652297	0.044855703012828	0.0335205709034572	Mt3/Prdx1/Prdx2/App	4
GO:0019098	GO:0019098	reproductive behavior	4/293	68/28814	0.00512119402652297	0.044855703012828	0.0335205709034572	Aplp2/Ncoa2/App/Thra	4
GO:1905710	GO:1905710	positive regulation of membrane permeability	4/293	68/28814	0.00512119402652297	0.044855703012828	0.0335205709034572	Chchd10/Mt3/Sh3glb1/Acaa2	4
GO:0031589	GO:0031589	cell-substrate adhesion	10/293	373/28814	0.00513886177112228	0.044855703012828	0.0335205709034572	S100a10/Actg1/Macf1/Map4k4/Cdc42/Itgb1/Cfl1/Calr/Spock2/Sdc4	10
GO:0031667	GO:0031667	response to nutrient levels	10/293	373/28814	0.00513886177112228	0.044855703012828	0.0335205709034572	Nupr1l/Hspa5/Mt3/Map1lc3b/Eif4g1/Pdia3/Rbp1/Sh3glb1/Higd1a/Gabarapl1	10
GO:0050878	GO:0050878	regulation of body fluid levels	10/293	373/28814	0.00513886177112228	0.044855703012828	0.0335205709034572	Anxa2/Map1lc3b/Anxa5/Ppia/Gja1/Ncor2/Akr1b3/Stmn1/Prdx2/Wnk1	10
GO:0009895	GO:0009895	negative regulation of catabolic process	9/293	315/28814	0.00519966201239772	0.045266023142412	0.0338272022585137	Dbi/Timp2/Anxa2/Mt3/Hsp90ab1/Laptm4b/Eif4g1/Svip/Ybx2	9
GO:0071805	GO:0071805	potassium ion transmembrane transport	7/293	206/28814	0.0053087098078248	0.0452983866313336	0.0338513874245509	Calm1/Atp1a1/Atp1b1/Atp1b3/Itgb1/Wnk1/Atp1a2	7
GO:0005513	GO:0005513	detection of calcium ion	2/293	11/28814	0.00533459378019738	0.0452983866313336	0.0338513874245509	Calm1/Stim1	2
GO:0045924	GO:0045924	regulation of female receptivity	2/293	11/28814	0.00533459378019738	0.0452983866313336	0.0338513874245509	Ncoa2/Thra	2
GO:0071888	GO:0071888	macrophage apoptotic process	2/293	11/28814	0.00533459378019738	0.0452983866313336	0.0338513874245509	Tcp1/Selenos	2
GO:0140719	GO:0140719	constitutive heterochromatin assembly	2/293	11/28814	0.00533459378019738	0.0452983866313336	0.0338513874245509	H3f3a/H3f3b	2
GO:1900454	GO:1900454	positive regulation of long-term synaptic depression	2/293	11/28814	0.00533459378019738	0.0452983866313336	0.0338513874245509	Ppp1r9a/App	2
GO:1901030	GO:1901030	positive regulation of mitochondrial outer membrane permeabilization involved in apoptotic signaling pathway	2/293	11/28814	0.00533459378019738	0.0452983866313336	0.0338513874245509	Chchd10/Sh3glb1	2
GO:1903059	GO:1903059	regulation of protein lipidation	2/293	11/28814	0.00533459378019738	0.0452983866313336	0.0338513874245509	Dbi/Svip	2
GO:1903332	GO:1903332	regulation of protein folding	2/293	11/28814	0.00533459378019738	0.0452983866313336	0.0338513874245509	Pdcd5/Pdia3	2
GO:0014002	GO:0014002	astrocyte development	3/293	35/28814	0.00535520231960921	0.0452983866313336	0.0338513874245509	Vim/Mt3/App	3
GO:0090218	GO:0090218	positive regulation of lipid kinase activity	3/293	35/28814	0.00535520231960921	0.0452983866313336	0.0338513874245509	Cdc42/Sh3glb1/App	3
GO:0032760	GO:0032760	positive regulation of tumor necrosis factor production	5/293	110/28814	0.00539938380144903	0.0455546982939736	0.0340429285817244	Clu/Mif/Akap12/Hspb1/App	5
GO:1901215	GO:1901215	negative regulation of neuron death	8/293	261/28814	0.00547557587770071	0.0460790770015737	0.0344347956681313	Mt3/Ppt1/Mt1/Hsp90ab1/Rack1/Prdx2/App/Chl1	8
GO:2001235	GO:2001235	positive regulation of apoptotic signaling pathway	6/293	157/28814	0.0055224714682365	0.0463548628101079	0.0346408898128713	Clu/Pdia3/Rack1/Sh3glb1/Serinc3/Bcl2l14	6
GO:0072330	GO:0072330	monocarboxylic acid biosynthetic process	7/293	208/28814	0.00559012267487392	0.0467154216287025	0.0349103346466778	Ldhb/Mif/Aldh1a1/Scd2/Gamt/Rbp1/Fabp5	7
GO:0010466	GO:0010466	negative regulation of peptidase activity	8/293	262/28814	0.00559968258640422	0.0467154216287025	0.0349103346466778	Timp2/Cst3/Mt3/Gapdh/Cstdc1/Cst9/Serpinb6a/App	8
GO:0099175	GO:0099175	regulation of postsynapse organization	5/293	111/28814	0.00560812800783326	0.0467154216287025	0.0349103346466778	Ppp1r9a/Cfl1/App/Dnm3/Lrp8	5
GO:0050885	GO:0050885	neuromuscular process controlling balance	4/293	70/28814	0.00567559649165633	0.0468368986543294	0.0350011141680578	Aplp2/Gm2a/Psap/App	4
GO:0000724	GO:0000724	double-strand break repair via homologous recombination	6/293	158/28814	0.00569273658230919	0.0468368986543294	0.0350011141680578	Actb/Ube2n/Rnf138/Sfr1/Morf4l2/Trrap	6
GO:1902652	GO:1902652	secondary alcohol metabolic process	6/293	158/28814	0.00569273658230919	0.0468368986543294	0.0350011141680578	Soat1/Mt3/Aplp2/Nfe2l1/Lima1/App	6
GO:0006816	GO:0006816	calcium ion transport	11/293	440/28814	0.00571626007372356	0.0468368986543294	0.0350011141680578	Dbi/Calm1/1810037I17Rik/Stim1/Ppp3ca/Atp1b1/Gja1/Fkbp1a/Tmco1/Itpr2/Atp1a2	11
GO:0034504	GO:0034504	protein localization to nucleus	9/293	320/28814	0.0057473054858398	0.0468368986543294	0.0350011141680578	Chchd10/Syne2/Txn1/Hsp90ab1/Ppp3ca/Cfl1/Calr/App/Chp2	9
GO:0010043	GO:0010043	response to zinc ion	3/293	36/28814	0.005798632996816	0.0468368986543294	0.0350011141680578	Mt3/Mt2/Mt1	3
GO:0010922	GO:0010922	positive regulation of phosphatase activity	3/293	36/28814	0.005798632996816	0.0468368986543294	0.0350011141680578	Calm1/Hsp90ab1/Chp2	3
GO:0051491	GO:0051491	positive regulation of filopodium assembly	3/293	36/28814	0.005798632996816	0.0468368986543294	0.0350011141680578	Espn/Cdc42/Dnm3	3
GO:1902110	GO:1902110	positive regulation of mitochondrial membrane permeability involved in apoptotic process	3/293	36/28814	0.005798632996816	0.0468368986543294	0.0350011141680578	Chchd10/Sh3glb1/Acaa2	3
GO:0048024	GO:0048024	regulation of mRNA splicing, via spliceosome	5/293	112/28814	0.00582250294057476	0.0468368986543294	0.0350011141680578	Malat1/Son/Prdx6/Rbm3/Prdx6b	5
GO:0071346	GO:0071346	cellular response to interferon-gamma	5/293	112/28814	0.00582250294057476	0.0468368986543294	0.0350011141680578	Vim/Actg1/Gapdh/Cdc42/Mrc1	5
GO:1903008	GO:1903008	organelle disassembly	5/293	112/28814	0.00582250294057476	0.0468368986543294	0.0350011141680578	Map1lc3b/Hk2/Hdac6/Gabarapl1/Spata18	5
GO:1903557	GO:1903557	positive regulation of tumor necrosis factor superfamily cytokine production	5/293	112/28814	0.00582250294057476	0.0468368986543294	0.0350011141680578	Clu/Mif/Akap12/Hspb1/App	5
GO:1905477	GO:1905477	positive regulation of protein localization to membrane	5/293	112/28814	0.00582250294057476	0.0468368986543294	0.0350011141680578	Mesd/Pdcd5/Rack1/Itgb1/Sh3glb1	5
GO:2001244	GO:2001244	positive regulation of intrinsic apoptotic signaling pathway	4/293	71/28814	0.00596722104561112	0.047791829009575	0.0357147315796882	Clu/Rack1/Sh3glb1/Serinc3	4
GO:0045927	GO:0045927	positive regulation of growth	9/293	322/28814	0.0059784306755348	0.047791829009575	0.0357147315796882	Macf1/H3f3a/Ybx3/Eif4g1/Cdc42/Map1b/Cfl1/Sh3glb1/H3f3b	9
GO:0007626	GO:0007626	locomotory behavior	8/293	265/28814	0.00598489997651899	0.047791829009575	0.0357147315796882	Espn/Aplp2/Ppt1/Ncoa2/Psap/App/Atp1a2/Chl1	8
GO:0000725	GO:0000725	recombinational repair	6/293	160/28814	0.00604472481111301	0.04804558314752	0.0359043615041283	Actb/Ube2n/Rnf138/Sfr1/Morf4l2/Trrap	6
GO:0019216	GO:0019216	regulation of lipid metabolic process	10/293	382/28814	0.00604595546615654	0.04804558314752	0.0359043615041283	Dbi/Atp1a1/Nfe2l1/Psap/Cdc42/Sh3glb1/App/Thra/Fabp5/Dkkl1	10
GO:0018208	GO:0018208	peptidyl-proline modification	3/293	37/28814	0.00626341646372252	0.0487601661455355	0.0364383678498661	Ppia/Fkbp1a/Egln2	3
GO:0009185	GO:0009185	ribonucleoside diphosphate metabolic process	5/293	114/28814	0.00626845795679697	0.0487601661455355	0.0364383678498661	Hk2/Gapdh/Pgam1/App/Pgam2	5
GO:0043967	GO:0043967	histone H4 acetylation	4/293	72/28814	0.00626864985340999	0.0487601661455355	0.0364383678498661	Actb/Morf4l2/Kansl3/Trrap	4
GO:0006880	GO:0006880	intracellular sequestering of iron ion	2/293	12/28814	0.00635872977156892	0.0487601661455355	0.0364383678498661	Ftl1/Fth1	2
GO:0007042	GO:0007042	lysosomal lumen acidification	2/293	12/28814	0.00635872977156892	0.0487601661455355	0.0364383678498661	Ppt1/Atp6v0c	2
GO:0007341	GO:0007341	penetration of zona pellucida	2/293	12/28814	0.00635872977156892	0.0487601661455355	0.0364383678498661	Dkkl1/Ppp3r2	2
GO:0031272	GO:0031272	regulation of pseudopodium assembly	2/293	12/28814	0.00635872977156892	0.0487601661455355	0.0364383678498661	Cdc42/Cdc42ep5	2
GO:0031274	GO:0031274	positive regulation of pseudopodium assembly	2/293	12/28814	0.00635872977156892	0.0487601661455355	0.0364383678498661	Cdc42/Cdc42ep5	2
GO:0033275	GO:0033275	actin-myosin filament sliding	2/293	12/28814	0.00635872977156892	0.0487601661455355	0.0364383678498661	Myl6/Tpm1	2
GO:0035437	GO:0035437	maintenance of protein localization in endoplasmic reticulum	2/293	12/28814	0.00635872977156892	0.0487601661455355	0.0364383678498661	Hspa5/Gja1	2
GO:0039654	GO:0039654	fusion of virus membrane with host endosome membrane	2/293	12/28814	0.00635872977156892	0.0487601661455355	0.0364383678498661	Ctsl/4930486L24Rik	2
GO:0060623	GO:0060623	regulation of chromosome condensation	2/293	12/28814	0.00635872977156892	0.0487601661455355	0.0364383678498661	H3f3a/H3f3b	2
GO:1900272	GO:1900272	negative regulation of long-term synaptic potentiation	2/293	12/28814	0.00635872977156892	0.0487601661455355	0.0364383678498661	Ppp1r9a/App	2
GO:1902947	GO:1902947	regulation of tau-protein kinase activity	2/293	12/28814	0.00635872977156892	0.0487601661455355	0.0364383678498661	Clu/App	2
GO:1904152	GO:1904152	regulation of retrograde protein transport, ER to cytosol	2/293	12/28814	0.00635872977156892	0.0487601661455355	0.0364383678498661	Svip/Ube2j1	2

## Sheet: Sertoli CC
	ID	Description	GeneRatio	BgRatio	pvalue	p.adjust	qvalue	geneID	Count
GO:0043209	GO:0043209	myelin sheath	26/293	215/28739	2.19174614449678e-20	8.83273696232201e-18	5.69853997569162e-18	Gstm1/Ldhb/Mif/Actb/Calm1/Anxa2/Hspa5/Actg1/Prdx1/Atp1a1/Gapdh/Tcp1/Atp1b1/Ppia/Pdia3/Cdc42/Pgam1/Itgb1/Tubb4b/Akr1b3/Cycs/Prdx2/Nme2/Gnb2/Itpr2/Atp1a2	26
GO:0005874	GO:0005874	microtubule	24/293	438/28739	3.01321403410715e-11	6.0716262787259e-09	3.91717824433929e-09	Reep1/Calm1/Mt3/Map1lc3b/Macf1/Tpt1/Stim1/Ncoa2/Tcp1/Bod1l/Dynll2/Selenos/Map1b/Tubb4b/Stmn1/Hdac6/Gabarapl1/Reep2/Dynlrb1/Kif21a/Dnm3/Tppp3/Tppp2/Tuba3a	24
GO:0043292	GO:0043292	contractile fiber	16/293	237/28739	3.39288588759081e-09	4.55777670899698e-07	2.9405011025787e-07	Tnni3/Dbi/Calm1/Cst3/Actg1/Hspb1/Tpm1/Acta2/Syne2/Anxa5/Myl12a/Ppp3ca/Gja1/Fkbp1a/Myl12b/Sdc4	16
GO:0032432	GO:0032432	actin filament bundle	10/293	97/28739	5.99191597382223e-08	6.0368553436259e-06	3.89474538298445e-06	Actb/Anxa2/Tpm1/Acta2/Myl12a/Tpm4/Cfl1/Tmsb15b2/Myl12b/Lima1	10
GO:0045121	GO:0045121	membrane raft	18/293	393/28739	1.43829902920784e-07	1.00311417121106e-05	6.47170433039393e-06	S100a10/Ldhb/Actb/Anxa2/Ppt1/Atp1a1/Stim1/Atp1b1/Atp1b3/Gja1/Itgb1/Bsg/Hdac6/App/Sdc4/Lrp8/Atp1a2/Lypd4	18
GO:0098857	GO:0098857	membrane microdomain	18/293	394/28739	1.49347023009091e-07	1.00311417121106e-05	6.47170433039393e-06	S100a10/Ldhb/Actb/Anxa2/Ppt1/Atp1a1/Stim1/Atp1b1/Atp1b3/Gja1/Itgb1/Bsg/Hdac6/App/Sdc4/Lrp8/Atp1a2/Lypd4	18
GO:0001725	GO:0001725	stress fiber	9/293	88/28739	2.97355449596081e-07	1.49792807734026e-05	9.66405211187262e-06	Actb/Anxa2/Tpm1/Acta2/Myl12a/Tpm4/Tmsb15b2/Myl12b/Lima1	9
GO:0097517	GO:0097517	contractile actin filament bundle	9/293	88/28739	2.97355449596081e-07	1.49792807734026e-05	9.66405211187262e-06	Actb/Anxa2/Tpm1/Acta2/Myl12a/Tpm4/Tmsb15b2/Myl12b/Lima1	9
GO:0042641	GO:0042641	actomyosin	9/293	97/28739	6.86608015395421e-07	3.07447811338172e-05	1.98353426669788e-05	Actb/Anxa2/Tpm1/Acta2/Myl12a/Tpm4/Tmsb15b2/Myl12b/Lima1	9
GO:0016529	GO:0016529	sarcoplasmic reticulum	8/293	76/28739	1.09739604262813e-06	4.42250605179138e-05	2.85322971083315e-05	Hsp90b1/Hk2/Stim1/Syne2/Fkbp1a/Calr/Manf/Itpr2	8
GO:0031252	GO:0031252	cell leading edge	17/293	412/28739	1.35538779620367e-06	4.96564801700071e-05	3.20364388193594e-05	S100a11/Actb/Anxa2/Vim/Tpm1/Macf1/Syne2/Ppp1r9a/Cdc42/Itgb1/Cfl1/Hdac6/Gabarapl1/Lima1/App/Nme2/Pkn2	17
GO:0016528	GO:0016528	sarcoplasm	8/293	85/28739	2.5875095995213e-06	8.68971973839236e-05	5.60627079896281e-05	Hsp90b1/Hk2/Stim1/Syne2/Fkbp1a/Calr/Manf/Itpr2	8
GO:0005890	GO:0005890	sodium:potassium-exchanging ATPase complex	4/293	11/28739	3.30159140643856e-06	0.000102349333599595	6.60318281287712e-05	Atp1a1/Atp1b1/Atp1b3/Atp1a2	4
GO:0030016	GO:0030016	myofibril	12/293	224/28739	3.65038730674674e-06	0.00010507900604421	6.77929071252966e-05	Tnni3/Calm1/Actg1/Hspb1/Tpm1/Syne2/Anxa5/Myl12a/Ppp3ca/Fkbp1a/Myl12b/Sdc4	12
GO:0098858	GO:0098858	actin-based cell projection	12/293	229/28739	4.57838311784741e-06	0.000117146459628625	7.55783610507261e-05	Espn/Ctsl/Cd302/Syne2/Ppp1r9a/Slc4a7/Cdc42/Itgb1/Cfl1/Akr1b3/Ube2k/App	12
GO:0030176	GO:0030176	integral component of endoplasmic reticulum membrane	10/293	155/28739	4.65097606466007e-06	0.000117146459628625	7.55783610507261e-05	Hspa5/Scd2/Stim1/Nfe2l1/Rrbp1/Pdia3/Selenos/Emc7/Tmco1/Calr	10
GO:0031227	GO:0031227	intrinsic component of endoplasmic reticulum membrane	10/293	163/28739	7.27005822568838e-06	0.000172343144997201	0.000111189125804646	Hspa5/Scd2/Stim1/Nfe2l1/Rrbp1/Pdia3/Selenos/Emc7/Tmco1/Calr	10
GO:0030175	GO:0030175	filopodium	8/293	99/28739	8.13893966381456e-06	0.000182221815806515	0.000117562461810655	Cd302/Syne2/Ppp1r9a/Cdc42/Itgb1/Cfl1/Ube2k/App	8
GO:0036126	GO:0036126	sperm flagellum	10/293	168/28739	9.48617778247232e-06	0.00019697881095446	0.000127083103841587	Atp1a1/Atp1b1/Atp1b3/Rsph1/Pgam1/Spata6/Spata18/Tppp2/Ppp3r2/Tcp11	10
GO:0090533	GO:0090533	cation-transporting ATPase complex	4/293	14/28739	9.77562337242979e-06	0.00019697881095446	0.000127083103841587	Atp1a1/Atp1b1/Atp1b3/Atp1a2	4
GO:0098533	GO:0098533	ATPase dependent transmembrane transport complex	4/293	16/28739	1.74899262019669e-05	0.000335640012352031	0.000216541943452923	Atp1a1/Atp1b1/Atp1b3/Atp1a2	4
GO:0097729	GO:0097729	9+2 motile cilium	10/293	184/28739	2.09274061731763e-05	0.000383352031263184	0.000247323891137538	Atp1a1/Atp1b1/Atp1b3/Rsph1/Pgam1/Spata6/Spata18/Tppp2/Ppp3r2/Tcp11	10
GO:0005788	GO:0005788	endoplasmic reticulum lumen	7/293	84/28739	2.46892678344744e-05	0.000432598910317094	0.000279096071172319	Clu/Hsp90b1/Hspa5/Pdia3/Calr/Erp29/Manf	7
GO:0005790	GO:0005790	smooth endoplasmic reticulum	5/293	35/28739	2.68958711723812e-05	0.000451626503436234	0.000291371937700796	Hsp90b1/Hspa5/Pdia3/Calr/Erp29	5
GO:0001669	GO:0001669	acrosomal vesicle	9/293	153/28739	2.91287135614664e-05	0.000469554862610838	0.00030293862103925	Tcp1/Pdia3/Itgb1/Calr/Bsg/Tssk2/Dkkl1/Tcp11/Ccdc136	9
GO:0014069	GO:0014069	postsynaptic density	13/293	330/28739	3.8716123654218e-05	0.000584440254393264	0.000377058228640816	Actb/Mt3/Hspb1/Macf1/Atp1a1/Ppp1r9a/Ncoa2/Cadm1/Map1b/Cnn3/Fabp5/Dnm3/Pdzd2	13
GO:0043197	GO:0043197	dendritic spine	10/293	198/28739	3.91560468203924e-05	0.000584440254393264	0.000377058228640816	Mt3/Ppp1r9a/Ncoa2/Ppp3ca/Cdc42/Itgb1/Cfl1/Cnn3/Dnm3/Atp1a2	10
GO:0030017	GO:0030017	sarcomere	10/293	199/28739	4.08623677577797e-05	0.000588126221656615	0.000379436272036526	Tnni3/Calm1/Hspb1/Tpm1/Syne2/Anxa5/Myl12a/Ppp3ca/Fkbp1a/Myl12b	10
GO:0045177	GO:0045177	apical part of cell	16/293	487/28739	4.61128729788105e-05	0.000640809924498643	0.00041342575774106	Ctsl/Actg1/Atp1a1/Slc4a7/Hsp90ab1/Atp1b1/Atp1b3/Pdia3/Gja1/Cdc42/Myl12b/Slc3a2/Akr1a1/App/Pdzd2/Chl1	16
GO:0044309	GO:0044309	neuron spine	10/293	203/28739	4.8337898979647e-05	0.000649339109626591	0.000418928457823607	Mt3/Ppp1r9a/Ncoa2/Ppp3ca/Cdc42/Itgb1/Cfl1/Cnn3/Dnm3/Atp1a2	10
GO:0032279	GO:0032279	asymmetric synapse	13/293	339/28739	5.09740645131037e-05	0.000662662838670348	0.000427524412045386	Actb/Mt3/Hspb1/Macf1/Atp1a1/Ppp1r9a/Ncoa2/Cadm1/Map1b/Cnn3/Fabp5/Dnm3/Pdzd2	13
GO:0005771	GO:0005771	multivesicular body	6/293	66/28739	5.80194608731089e-05	0.000730682585370716	0.00047140811959401	Ctsl/Cst3/Tpt1/Laptm4b/Gja1/4930486L24Rik	6
GO:0014704	GO:0014704	intercalated disc	6/293	67/28739	6.31859029128355e-05	0.000751029335278758	0.000484535055018553	Atp1a1/Anxa5/Atp1b1/Gja1/Itgb1/Atp1a2	6
GO:0062023	GO:0062023	collagen-containing extracellular matrix	14/293	396/28739	6.33622764255031e-05	0.000751029335278758	0.000484535055018553	Sparc/S100a11/S100a10/Ctsl/Timp2/Anxa2/Cst3/Anxa5/Serpinb6a/Itgb1/Calr/Mgp/Spock2/Mfge8	14
GO:0031301	GO:0031301	integral component of organelle membrane	13/293	350/28739	7.04346645723503e-05	0.000811004852075919	0.000523228936823174	Chchd10/Hspa5/Scd2/Stim1/Sys1/Nfe2l1/Rrbp1/Pdia3/Selenos/Emc7/Tmco1/Calr/Pet100	13
GO:0099572	GO:0099572	postsynaptic specialization	13/293	352/28739	7.45917708730815e-05	0.000823440974872281	0.000531252241853085	Actb/Mt3/Hspb1/Macf1/Atp1a1/Ppp1r9a/Ncoa2/Cadm1/Map1b/Cnn3/Fabp5/Dnm3/Pdzd2	13
GO:0031514	GO:0031514	motile cilium	11/293	258/28739	7.56012805714005e-05	0.000823440974872281	0.000531252241853085	Atp1a1/Atp1b1/Atp1b3/Rsph1/Pgam1/Spata6/Spata18/Tppp2/Sord/Ppp3r2/Tcp11	11
GO:0044853	GO:0044853	plasma membrane raft	8/293	136/28739	8.08792112003417e-05	0.000857745318782571	0.000553384076633917	Atp1a1/Stim1/Atp1b1/Atp1b3/Hdac6/Lrp8/Atp1a2/Lypd4	8
GO:0098984	GO:0098984	neuron to neuron synapse	13/293	361/28739	9.60426961274498e-05	0.000992441193316981	0.000640284640849665	Actb/Mt3/Hspb1/Macf1/Atp1a1/Ppp1r9a/Ncoa2/Cadm1/Map1b/Cnn3/Fabp5/Dnm3/Pdzd2	13
GO:0031300	GO:0031300	intrinsic component of organelle membrane	13/293	370/28739	0.000122636418729631	0.00123556191870103	0.000797136721742599	Chchd10/Hspa5/Scd2/Stim1/Sys1/Nfe2l1/Rrbp1/Pdia3/Selenos/Emc7/Tmco1/Calr/Pet100	13
GO:0150034	GO:0150034	distal axon	13/293	375/28739	0.000139989998826173	0.00137599925675482	0.000887741455970851	Clu/Actb/Calm1/Timp2/Actg1/Stim1/Anxa5/Ppp1r9a/Hsp90ab1/Map1b/Fkbp1a/Cfl1/App	13
GO:0016234	GO:0016234	inclusion body	6/293	79/28739	0.000158914401969188	0.00152482152365674	0.000983755821714023	Clu/Mt3/Hsp90ab1/Pabpn1/Psap/Hdac6	6
GO:0098793	GO:0098793	presynapse	15/293	493/28739	0.000183921825915086	0.00172373246148324	0.00111208545902145	Dbi/Actb/Calm1/Mt3/Actg1/Ppt1/Anxa5/Ncoa2/Cadm1/Atp6v0c/Fkbp1a/Sh3glb1/App/Dnm3/Kctd16	15
GO:0098685	GO:0098685	Schaffer collateral - CA1 synapse	6/293	83/28739	0.000208581800419428	0.0019104196720234	0.00123252882066026	Actb/Akap12/Actg1/Ppp3ca/Cadm1/Itgb1	6
GO:0030426	GO:0030426	growth cone	9/293	203/28739	0.000253441680284569	0.00226971104788181	0.00146432970831084	Clu/Calm1/Timp2/Stim1/Ppp1r9a/Hsp90ab1/Map1b/Cfl1/App	9
GO:0008021	GO:0008021	synaptic vesicle	9/293	205/28739	0.000272471363102869	0.00238463938834215	0.00153847702473687	Dbi/Calm1/Mt3/Ppt1/Anxa5/Cadm1/Atp6v0c/Sh3glb1/App	9
GO:0044754	GO:0044754	autolysosome	3/293	13/28739	0.000278109308317819	0.00238463938834215	0.00153847702473687	Ftl1/Map1lc3b/Fth1	3
GO:0005938	GO:0005938	cell cortex	11/293	305/28739	0.000323872558343516	0.00262175250802067	0.00169145323098107	Actb/Anxa2/Macf1/Cd302/Stim1/Ppp1r9a/Pfn1/Tpm4/Cfl1/Myl12b/Itpr2	11
GO:0044291	GO:0044291	cell-cell contact zone	6/293	90/28739	0.000324220915541369	0.00262175250802067	0.00169145323098107	Atp1a1/Anxa5/Atp1b1/Gja1/Itgb1/Atp1a2	6
GO:0030427	GO:0030427	site of polarized growth	9/293	210/28739	0.00032527946749636	0.00262175250802067	0.00169145323098107	Clu/Calm1/Timp2/Stim1/Ppp1r9a/Hsp90ab1/Map1b/Cfl1/App	9
GO:0140534	GO:0140534	endoplasmic reticulum protein-containing complex	7/293	130/28739	0.000386934378354036	0.0030575402838564	0.00197260663474606	Hsp90b1/Hspa5/Pdia3/Selenos/Emc7/Calr/Dad1	7
GO:0030018	GO:0030018	Z disc	7/293	132/28739	0.00042429616764777	0.00328829529927022	0.00212148083823885	Hspb1/Syne2/Anxa5/Myl12a/Ppp3ca/Fkbp1a/Myl12b	7
GO:0005901	GO:0005901	caveola	6/293	96/28739	0.000458814312785102	0.003488720151932	0.00225078719479484	Atp1a1/Atp1b1/Atp1b3/Hdac6/Lrp8/Atp1a2	6
GO:0030141	GO:0030141	secretory granule	13/293	432/28739	0.000542653314858862	0.00404980159052077	0.00261277521969082	Sparc/Ctsl/Tcp1/Pdia3/Cdc42/Itgb1/Calr/Bsg/Itpr2/Tssk2/Dkkl1/Tcp11/Ccdc136	13
GO:0070382	GO:0070382	exocytic vesicle	9/293	228/28739	0.00059016396685607	0.00427902085734718	0.00276065861764334	Dbi/Calm1/Mt3/Ppt1/Anxa5/Cadm1/Atp6v0c/Sh3glb1/App	9
GO:0097386	GO:0097386	glial cell projection	4/293	38/28739	0.000594603394569335	0.00427902085734718	0.00276065861764334	Mt3/Itgb1/Akr1b3/App	4
GO:0005767	GO:0005767	secondary lysosome	3/293	17/28739	0.000641554927607511	0.00453590589168118	0.00292639089785882	Ftl1/Map1lc3b/Fth1	3
GO:0031970	GO:0031970	organelle envelope lumen	6/293	104/28739	0.000701806991457962	0.0048763485785786	0.00314603134101845	Chchd10/Pdia3/Cycs/App/Chchd2/Ggnbp1	6
GO:0031674	GO:0031674	I band	7/293	145/28739	0.000743095702627515	0.00507572149421845	0.00327465902852803	Hspb1/Syne2/Anxa5/Myl12a/Ppp3ca/Fkbp1a/Myl12b	7
GO:0016460	GO:0016460	myosin II complex	3/293	18/28739	0.00076407857749617	0.00513206111218261	0.00331100716915007	Myl6/Myl12a/Myl12b	3
GO:1902562	GO:1902562	H4 histone acetyltransferase complex	4/293	41/28739	0.000796446471017607	0.00526176930852616	0.00339468987646849	Actb/Morf4l2/Kansl3/Trrap	4
GO:0005770	GO:0005770	late endosome	9/293	246/28739	0.00101036118523972	0.00646173619602307	0.00416886206195037	Ctsl/Anxa2/Cst3/Tpt1/Gapdh/Laptm4b/Psap/Gja1/4930486L24Rik	9
GO:0001726	GO:0001726	ruffle	7/293	153/28739	0.00101823485914304	0.00646173619602307	0.00416886206195037	S100a11/Anxa2/Tpm1/Macf1/Itgb1/Lima1/Nme2	7
GO:0000118	GO:0000118	histone deacetylase complex	5/293	75/28739	0.00102618143063394	0.00646173619602307	0.00416886206195037	Sin3b/Ncor2/Gatad2a/Hdac6/Trrap	5
GO:0005875	GO:0005875	microtubule associated complex	7/293	154/28739	0.0010576032754875	0.00655714030802252	0.00423041310195001	Map1lc3b/Acta2/Dynll2/Map1b/Hdac6/Dynlrb1/Kif21a	7
GO:0019867	GO:0019867	outer membrane	8/293	209/28739	0.00143402626352187	0.00862556095819873	0.00556487803754757	Mt3/Hk2/Syne2/Agpat4/Gja1/Tomm6/Sh3glb1/Spata18	8
GO:0031968	GO:0031968	organelle outer membrane	8/293	209/28739	0.00143402626352187	0.00862556095819873	0.00556487803754757	Mt3/Hk2/Syne2/Agpat4/Gja1/Tomm6/Sh3glb1/Spata18	8
GO:0042383	GO:0042383	sarcolemma	7/293	165/28739	0.0015745168250143	0.00926351852291117	0.0059764635631685	Anxa2/Atp1a1/Anxa5/Atp1b1/Itgb1/Bsg/Atp1a2	7
GO:0033017	GO:0033017	sarcoplasmic reticulum membrane	3/293	23/28739	0.00159700279432497	0.00926351852291117	0.0059764635631685	Stim1/Fkbp1a/Itpr2	3
GO:0030133	GO:0030133	transport vesicle	10/293	316/28739	0.00160904788239152	0.00926351852291117	0.0059764635631685	Dbi/Calm1/Mt3/Ppt1/Anxa5/Cadm1/Atp6v0c/Sh3glb1/Erp29/App	10
GO:0032994	GO:0032994	protein-lipid complex	4/293	50/28739	0.00168582407194138	0.00956883240834335	0.00617344026344732	Clu/Dbi/Selenos/App	4
GO:0005776	GO:0005776	autophagosome	5/293	87/28739	0.00199000809488291	0.0111385175310808	0.00718614034263275	Ftl1/Map1lc3b/Fth1/Sh3glb1/Gabarapl1	5
GO:0045277	GO:0045277	respiratory chain complex IV	3/293	25/28739	0.00204306499430611	0.0112788382562379	0.00727666984273411	Cox6b1/Cox6b2/Cox8c	3
GO:0000786	GO:0000786	nucleosome	5/293	89/28739	0.00219899052787763	0.0118433410963469	0.0076408652234496	Actb/H3f3a/H3f3b/Morf4l2/Trrap	5
GO:0097731	GO:0097731	9+0 non-motile cilium	6/293	130/28739	0.00221480706256087	0.0118433410963469	0.0076408652234496	Inha/Dynll2/Map1b/Bsg/Lyar/Cetn1	6
GO:0016459	GO:0016459	myosin complex	4/293	54/28739	0.00224250456962802	0.0118433410963469	0.0076408652234496	Myl6/Myl12a/Dynll2/Myl12b	4
GO:0030027	GO:0030027	lamellipodium	7/293	176/28739	0.00226979057467856	0.0118433410963469	0.0076408652234496	Actb/Syne2/Ppp1r9a/Cfl1/App/Nme2/Pkn2	7
GO:0071782	GO:0071782	endoplasmic reticulum tubular network	3/293	26/28739	0.00229225956703488	0.0118433410963469	0.0076408652234496	Reep1/Stim1/Reep2	3
GO:0005758	GO:0005758	mitochondrial intermembrane space	5/293	91/28739	0.00242352080552705	0.012363023856043	0.00797614442325357	Chchd10/Pdia3/Cycs/Chchd2/Ggnbp1	5
GO:0005884	GO:0005884	actin filament	6/293	133/28739	0.00248304921675515	0.0125083604294041	0.00806990995445423	Espn/Actb/Actg1/Tpm1/Tpm4/Tmsb15b2	6
GO:0035267	GO:0035267	NuA4 histone acetyltransferase complex	3/293	27/28739	0.00255949376243043	0.0125789754421886	0.00811546802721843	Actb/Morf4l2/Trrap	3
GO:0043189	GO:0043189	H4/H2A histone acetyltransferase complex	3/293	27/28739	0.00255949376243043	0.0125789754421886	0.00811546802721843	Actb/Morf4l2/Trrap	3
GO:0005743	GO:0005743	mitochondrial inner membrane	12/293	460/28739	0.00289261697838175	0.0138530507077497	0.00893745206951591	Clu/Ldhb/Chchd10/Atp5j/Pet100/Higd1a/Tmem256/Acaa2/Cox6b1/Ndufb4/Cox6b2/Cox8c	12
GO:0001917	GO:0001917	photoreceptor inner segment	4/293	58/28739	0.00291437938180319	0.0138530507077497	0.00893745206951591	Inha/Bsg/Dnm3/Asrgl1	4
GO:0070469	GO:0070469	respirasome	5/293	95/28739	0.00292185933041866	0.0138530507077497	0.00893745206951591	Higd1a/Cox6b1/Ndufb4/Cox6b2/Cox8c	5
GO:0005741	GO:0005741	mitochondrial outer membrane	7/293	188/28739	0.00327600781528038	0.0153515249948604	0.00990420967410348	Mt3/Hk2/Agpat4/Gja1/Tomm6/Sh3glb1/Spata18	7
GO:0030496	GO:0030496	midbody	7/293	190/28739	0.00347233725619496	0.0160845047614548	0.0103770998460999	Hsp90b1/Anxa2/Hspa5/Cdc42/Rack1/Sh3glb1/Pkn2	7
GO:0016323	GO:0016323	basolateral plasma membrane	8/293	246/28739	0.00391453951547714	0.0179268116447419	0.0115656849320916	Anxa2/Atp1a1/Slc4a7/Hsp90ab1/Atp1b1/Cadm1/Atp1b3/Slc3a2	8
GO:0000805	GO:0000805	X chromosome	2/293	10/28739	0.00441640185560247	0.0199978645821101	0.0129018481174904	H3f3a/Sin3b	2
GO:0042824	GO:0042824	MHC class I peptide loading complex	2/293	11/28739	0.0053616257936409	0.0240081688315254	0.0154891411816293	Pdia3/Calr	2
GO:0031256	GO:0031256	leading edge membrane	6/293	158/28739	0.0057632642746055	0.0255230275018244	0.0164664693560157	Tpm1/Macf1/Syne2/Cdc42/Itgb1/Gabarapl1	6
GO:0000421	GO:0000421	autophagosome membrane	3/293	36/28739	0.00584038456665295	0.0255834236995776	0.0165054346448888	Map1lc3b/Sh3glb1/Gabarapl1	3
GO:0070069	GO:0070069	cytochrome complex	3/293	37/28739	0.00630839352869094	0.0271106161060695	0.0174907200684319	Cox6b1/Cox6b2/Cox8c	3
GO:0034663	GO:0034663	endoplasmic reticulum chaperone complex	2/293	12/28739	0.00639084002500397	0.0271106161060695	0.0174907200684319	Hsp90b1/Hspa5	2
GO:0097441	GO:0097441	basal dendrite	2/293	12/28739	0.00639084002500397	0.0271106161060695	0.0174907200684319	Malat1/Map1b	2
GO:0016235	GO:0016235	aggresome	3/293	38/28739	0.00679814696875851	0.0282438477155637	0.0182218372358476	Clu/Psap/Hdac6	3
GO:0031941	GO:0031941	filamentous actin	3/293	38/28739	0.00679814696875851	0.0282438477155637	0.0182218372358476	Espn/Actg1/Tmsb15b2	3
GO:0097733	GO:0097733	photoreceptor cell cilium	5/293	117/28739	0.00705625620994188	0.0290170535980263	0.0187206797406621	Inha/Map1b/Bsg/Lyar/Cetn1	5
GO:0097730	GO:0097730	non-motile cilium	6/293	167/28739	0.00749233067503675	0.0304954202435048	0.0196744646732289	Inha/Dynll2/Map1b/Bsg/Lyar/Cetn1	6
GO:0005604	GO:0005604	basement membrane	5/293	119/28739	0.00756710179739573	0.0304954202435048	0.0196744646732289	Sparc/Timp2/Anxa2/Cst3/Itgb1	5
GO:0009925	GO:0009925	basal plasma membrane	8/293	276/28739	0.00768496875464058	0.0306637862190114	0.0197830878832332	Anxa2/Atp1a1/Slc4a7/Hsp90ab1/Atp1b1/Cadm1/Atp1b3/Slc3a2	8
GO:0005925	GO:0005925	focal adhesion	6/293	169/28739	0.00792239086949788	0.0312957809974923	0.020190826449995	Syne2/Map4k4/Itgb1/Cfl1/Lima1/Sdc4	6
GO:0005844	GO:0005844	polysome	4/293	77/28739	0.00799867355519034	0.0312957809974923	0.020190826449995	Vim/Eif4g1/Calr/Ybx2	4
GO:0034362	GO:0034362	low-density lipoprotein particle	2/293	14/28739	0.0086940713410997	0.0336895264467613	0.0217351783527493	Selenos/App	2
GO:0005881	GO:0005881	cytoplasmic microtubule	4/293	81/28739	0.00952868876937423	0.0365720149910268	0.0235948483813076	Reep1/Tpt1/Selenos/Reep2	4
GO:0043220	GO:0043220	Schmidt-Lanterman incisure	2/293	15/28739	0.00996457336905863	0.0378841798842512	0.0244414063769363	Anxa2/Akr1b3	2
GO:0045111	GO:0045111	intermediate filament cytoskeleton	6/293	180/28739	0.0106105089157798	0.0399629447949465	0.0257825450289977	Vim/Macf1/Syne2/Gja1/Nme2/Pkn2	6
GO:0001750	GO:0001750	photoreceptor outer segment	4/293	84/28739	0.0107930154035401	0.0402739371076544	0.0259831852307448	Inha/Map1b/Bsg/Lyar	4
GO:0030055	GO:0030055	cell-substrate junction	6/293	182/28739	0.0111609683561986	0.0412648646564041	0.0266224933267123	Syne2/Map4k4/Itgb1/Cfl1/Lima1/Sdc4	6
GO:0043196	GO:0043196	varicosity	2/293	16/28739	0.0113120348308883	0.0414431821531636	0.0267375368730088	Cadm1/Map1b	2
GO:0005774	GO:0005774	vacuolar membrane	7/293	239/28739	0.0116751822804903	0.0420747381049809	0.0271449923257941	Anxa2/Map1lc3b/Hsp90ab1/Laptm4b/Atp6v0c/Sh3glb1/Gabarapl1	7
GO:0000123	GO:0000123	histone acetyltransferase complex	4/293	86/28739	0.011693227463419	0.0420747381049809	0.0271449923257941	Actb/Morf4l2/Kansl3/Trrap	4
GO:0098803	GO:0098803	respiratory chain complex	4/293	87/28739	0.012160852493228	0.0428213973852197	0.0276267079904644	Cox6b1/Ndufb4/Cox6b2/Cox8c	4
GO:0034358	GO:0034358	plasma lipoprotein particle	3/293	47/28739	0.0122195054573208	0.0428213973852197	0.0276267079904644	Clu/Selenos/App	3
GO:1990777	GO:1990777	lipoprotein particle	3/293	47/28739	0.0122195054573208	0.0428213973852197	0.0276267079904644	Clu/Selenos/App	3
GO:0045178	GO:0045178	basal part of cell	8/293	301/28739	0.0125141447691965	0.0434758650171224	0.028048945172337	Anxa2/Atp1a1/Slc4a7/Hsp90ab1/Atp1b1/Cadm1/Atp1b3/Slc3a2	8
GO:0030667	GO:0030667	secretory granule membrane	4/293	90/28739	0.0136350150563881	0.0469650518608923	0.0303000334586402	Sparc/Bsg/Itpr2/Ccdc136	4
GO:0016324	GO:0016324	apical plasma membrane	9/293	369/28739	0.0139770656238351	0.0477352325966572	0.0307969242559079	Atp1a1/Slc4a7/Hsp90ab1/Atp1b1/Atp1b3/Pdia3/Gja1/Slc3a2/Akr1a1	9
GO:0044305	GO:0044305	calyx of Held	2/293	18/28739	0.0142311013480545	0.0481944020442517	0.0310931626091947	Actb/Actg1	2
GO:0032993	GO:0032993	protein-DNA complex	6/293	194/28739	0.014893889243705	0.0498774743631536	0.0321790157181636	Actb/H3f3a/Jund/H3f3b/Morf4l2/Trrap	6
GO:0043204	GO:0043204	perikaryon	5/293	141/28739	0.0149756188534531	0.0498774743631536	0.0321790157181636	Ctsl/Hspb1/Anxa5/Map1b/Hdac6	5

## Sheet: Primary spermatocytes BP
	ID	Description	GeneRatio	BgRatio	pvalue	p.adjust	qvalue	geneID	Count
GO:0006397	GO:0006397	mRNA processing	165/1569	472/28814	2.0955432752e-88	1.105399077668e-84	7.99174030110484e-85	Npm1/Snrpf/Snu13/Ddx5/Ncl/Snrpe/Snrpg/Hspa8/Snrpd1/Snrpd2/Hnrnpa2b1/Rbm27/Fmr1/Srsf2/Rbm39/Hnrnpf/Srsf3/Hnrnpu/Ybx1/Cirbp/Srrm2/Pabpc1/Srrm1/Luc7l2/Psip1/Ubl5/Ythdc1/Alyref/Srsf7/Srsf9/Cwc15/Hnrnpa3/Srsf10/Rbm25/Tra2a/Zcrb1/Sfpq/Papola/Snrnp70/Qk/Hnrnph1/Cdk12/Nudt21/Pnn/Lsm2/Luc7l3/Hnrnpk/Iws1/Prpf40a/Zranb2/Snrpb/Zc3h14/Rbm8a/Dhx36/Thrap3/Lsm4/Strap/Snrpd3/Ppp4r2/Srsf6/Hnrnpc/Slbp/Son/Acin1/Sf3…	165
GO:0008380	GO:0008380	RNA splicing	144/1569	404/28814	2.28482767855785e-78	6.02623300219632e-75	4.35680562074478e-75	Npm1/Snrpf/Snu13/Ddx5/Ncl/Snrpe/Snrpg/Hspa8/Snrpd1/Snrpd2/Hnrnpa2b1/Fmr1/Srsf2/Rbm39/Hnrnpf/Taf15/Srsf3/Hnrnpu/Ybx1/Cirbp/Srrm2/Pabpc1/Srrm1/Polr2a/Luc7l2/Psip1/Ubl5/Ythdc1/Alyref/Srsf7/Rtraf/Srsf9/Cwc15/Hnrnpa3/Srsf10/Rbm25/Fus/Tra2a/Zcrb1/Sfpq/Snrnp70/Qk/Hnrnph1/Cdk12/Pnn/Lsm2/Luc7l3/Zfp638/Hnrnpk/Iws1/Prpf40a/Zranb2/Snrpb/Rbm8a/Thrap3/Lsm4/Strap/Snrpd3/Ppp4r2/Srsf6/Hnrnpc/Son/Acin1/Sf3b1/Lsm5/…	144
GO:0000375	GO:0000375	RNA splicing, via transesterification reactions	104/1569	281/28814	1.69559132888961e-58	1.78884885197854e-55	1.29328997569833e-55	Npm1/Snrpf/Snu13/Ddx5/Ncl/Snrpe/Snrpg/Hspa8/Snrpd1/Snrpd2/Hnrnpa2b1/Fmr1/Srsf2/Rbm39/Srsf3/Hnrnpu/Cirbp/Srrm2/Srrm1/Luc7l2/Psip1/Ubl5/Ythdc1/Srsf7/Srsf9/Cwc15/Srsf10/Rbm25/Tra2a/Zcrb1/Sfpq/Snrnp70/Qk/Lsm2/Luc7l3/Hnrnpk/Prpf40a/Snrpb/Rbm8a/Thrap3/Lsm4/Strap/Snrpd3/Srsf6/Son/Acin1/Sf3b1/Lsm5/Bcas2/Khdrbs1/Magoh/Srsf5/Scaf11/Cdc5l/Lsm8/Fxr1/Rbm6/Rbm17/Rbmxl2/Snrpb2/Nsrp1/Lsm6/Lsm3/Hnrnpa1/Rbmx2/Srsf…	104
GO:0000377	GO:0000377	RNA splicing, via transesterification reactions with bulged adenosine as nucleophile	104/1569	281/28814	1.69559132888961e-58	1.78884885197854e-55	1.29328997569833e-55	Npm1/Snrpf/Snu13/Ddx5/Ncl/Snrpe/Snrpg/Hspa8/Snrpd1/Snrpd2/Hnrnpa2b1/Fmr1/Srsf2/Rbm39/Srsf3/Hnrnpu/Cirbp/Srrm2/Srrm1/Luc7l2/Psip1/Ubl5/Ythdc1/Srsf7/Srsf9/Cwc15/Srsf10/Rbm25/Tra2a/Zcrb1/Sfpq/Snrnp70/Qk/Lsm2/Luc7l3/Hnrnpk/Prpf40a/Snrpb/Rbm8a/Thrap3/Lsm4/Strap/Snrpd3/Srsf6/Son/Acin1/Sf3b1/Lsm5/Bcas2/Khdrbs1/Magoh/Srsf5/Scaf11/Cdc5l/Lsm8/Fxr1/Rbm6/Rbm17/Rbmxl2/Snrpb2/Nsrp1/Lsm6/Lsm3/Hnrnpa1/Rbmx2/Srsf…	104
GO:0000398	GO:0000398	mRNA splicing, via spliceosome	104/1569	281/28814	1.69559132888961e-58	1.78884885197854e-55	1.29328997569833e-55	Npm1/Snrpf/Snu13/Ddx5/Ncl/Snrpe/Snrpg/Hspa8/Snrpd1/Snrpd2/Hnrnpa2b1/Fmr1/Srsf2/Rbm39/Srsf3/Hnrnpu/Cirbp/Srrm2/Srrm1/Luc7l2/Psip1/Ubl5/Ythdc1/Srsf7/Srsf9/Cwc15/Srsf10/Rbm25/Tra2a/Zcrb1/Sfpq/Snrnp70/Qk/Lsm2/Luc7l3/Hnrnpk/Prpf40a/Snrpb/Rbm8a/Thrap3/Lsm4/Strap/Snrpd3/Srsf6/Son/Acin1/Sf3b1/Lsm5/Bcas2/Khdrbs1/Magoh/Srsf5/Scaf11/Cdc5l/Lsm8/Fxr1/Rbm6/Rbm17/Rbmxl2/Snrpb2/Nsrp1/Lsm6/Lsm3/Hnrnpa1/Rbmx2/Srsf…	104
GO:1903311	GO:1903311	regulation of mRNA metabolic process	92/1569	308/28814	8.73102392995152e-43	7.67602520508237e-40	5.54956135056392e-40	Npm1/Dazl/Ddx5/Ncl/Hspa8/Hnrnpa2b1/Fmr1/Rock1/Srsf2/Rbm39/Taf15/Srsf3/Hnrnpu/Ybx1/Cirbp/Rock2/Tut4/Meioc/Pabpc1/Srrm1/Hnrnpab/Ythdc1/Srsf7/Srsf9/Srsf10/Rbm25/Fus/Tra2a/Papola/Snrnp70/Qk/Nudt21/Hnrnpk/Iws1/Zc3h14/Rbm8a/Dhx36/Thrap3/Srsf6/Hnrnpc/Tnrc6c/Son/Acin1/Alkbh5/Hnrnpr/Rbm46/Khdrbs1/Csde1/Magoh/Hnrnpa0/Fxr1/Rbmxl2/Nsrp1/Syncrip/Eif4enif1/Srsf1/Sltm/Adarb1/Ythdf2/Gigyf2/Sap18/Rnf20/Ddx17/Hnrn…	92
GO:0007059	GO:0007059	chromosome segregation	94/1569	340/28814	1.47408309887469e-40	1.110826906652e-37	8.03098205597442e-38	Tex15/Smc1b/Smc3/Syce3/Syce2/Cenpf/4930447C04Rik/Smarca5/Hormad1/Sycp1/Tpr/Smc4/Mki67/Bub1/Brca2/Zcwpw1/Ube2i/Esco2/Smc6/Hnrnpu/Top2a/Ran/Meioc/Sycp3/Tex12/Stag1/Ube2b/Nipbl/Cdc42/Dmc1/Nudc/Cenpw/Sfpq/Cul3/Top1/Wapl/Banf1/Stag3/Usp9x/Anapc5/Top2b/Cdca8/Kif23/Knl1/Naa50/Ncapg2/Csnk2a1/Csnk2a2/Smc5/Tex11/Cenpe/Mael/Ankrd31/Esco1/Vps4b/M1ap/Prdm9/Ncapg/Akap8l/Fbxw7/Ciao2b/Ctnnb1/Ik/Prc1/Meiob/Rad18/…	94
GO:0022613	GO:0022613	ribonucleoprotein complex biogenesis	100/1569	406/28814	2.69309865922918e-38	1.77576192842924e-35	1.28382847926149e-35	Npm1/Snrpf/Snu13/Ncl/Snrpe/Snrpg/Eif2s2/Hsp90ab1/Hsp90aa1/Snrpd1/Snrpd2/Esf1/Ran/Nol8/Ckap5/Mrpl20/Luc7l2/Psip1/Eif2s3y/Ptges3/Ythdc1/Srsf10/Atr/Nop10/Nudt21/Lsm2/Luc7l3/Rsl1d1/Eif5/Ddx10/Snrpb/Eif3a/Lsm4/Strap/Snrpd3/Srsf6/Gtf2h5/Sf3b1/Utp18/Denr/Ebna1bp2/Scaf11/Mphosph10/Ramac/Nup88/Pak1ip1/Malsu1/Npm3/Gnl2/Lsm6/Nop58/Trmt112/Srsf1/Nmd3/Luc7l/Snrpc/Ythdf2/Ddx17/Ddx39b/Cul4b/Eif3d/Prpf8/Brix1/Ce…	100
GO:0098813	GO:0098813	nuclear chromosome segregation	80/1569	277/28814	3.67953426399302e-36	2.15661591584035e-33	1.55917574718675e-33	Tex15/Smc1b/Smc3/Syce3/Syce2/Cenpf/4930447C04Rik/Smarca5/Hormad1/Sycp1/Tpr/Smc4/Bub1/Brca2/Zcwpw1/Esco2/Hnrnpu/Top2a/Ran/Meioc/Sycp3/Tex12/Stag1/Ube2b/Nipbl/Cdc42/Dmc1/Nudc/Sfpq/Cul3/Wapl/Stag3/Anapc5/Top2b/Cdca8/Kif23/Knl1/Naa50/Ncapg2/Smc5/Tex11/Cenpe/Mael/Ankrd31/Esco1/Vps4b/M1ap/Prdm9/Ncapg/Akap8l/Fbxw7/Ctnnb1/Ik/Prc1/Meiob/Baz1b/Smc2/Cdc20/Chmp4b/Dync1h1/Slf1/Ccne2/Pds5a/Eml4/Psmc3ip/Hfm1/Ph…	80
GO:0016570	GO:0016570	histone modification	107/1569	495/28814	2.06727887562999e-35	1.09048960689482e-32	7.88394880674468e-33	H3f3a/Smarca5/Actb/Brca2/Fmr1/Hat1/Rif1/Kdm5b/Scml2/Kdm5a/Ube2b/Nipbl/Kdm1a/Arid4b/Sfpq/Setdb1/Park7/Chd4/Sin3b/Iws1/Suz12/Nsd1/Usp3/Slk/Eny2/Huwe1/Pcgf5/Nsd2/Ppp4r2/Usp16/Trip12/Morf4l1/Ash1l/Naa50/Hdac1/Ube2n/Jarid2/Kmt2a/Hpf1/Mrgbp/Baz2a/Trim37/Ezh2/Rbbp7/Usp15/Ep400/Smarca4/Prdm9/Ppp4r3b/Taf7/Brd7/Mbtd1/Kdm7a/Trmt112/Rbbp4/Akap8l/Rnf20/Atf2/Zfp451/Parg/Taf10/Rybp/Gatad2a/Pcgf6/Cul4b/Auts2/Taf…	107
GO:0006119	GO:0006119	oxidative phosphorylation	52/1569	116/28814	9.2232356361695e-35	4.42296072552674e-32	3.19768255596575e-32	Cox7c/Cox5b/Uqcrh/Cox5a/Atp5j/Cox4i1/Atp5e/Uqcrb/Atp5b/Atp5h/Ndufa7/Cox7a2/Atp5j2/Ndufv2/Uqcc2/Park7/Atp5d/Cox7a2l/Ndufc2/Chchd2/Ndufs6/Ndufb6/Cyc1/Cox6a1/Vcp/Cycs/Uqcr10/Atp5a1/Atp5o/Ndufb9/Ndufa12/Dnajc15/Ndufb8/Atp5c1/Uqcrq/Rhoa/Cdk1/Slc25a33/Cyct/Mtch2/Ndufv1/Ndufa10/Ndufa8/Ndufs7/Ndufs3/Chchd10/Dld/Sdhc/Atp5k/Uqcrfs1/Ndufs1/Sdha	52
GO:0000280	GO:0000280	nuclear division	100/1569	445/28814	1.1944593789436e-34	5.25064435327291e-32	3.79607572799357e-32	Tex15/Smc1b/Stra8/Dazl/Calr/Smc3/Syce3/Syce2/4930447C04Rik/Smarca5/Hormad1/Sycp1/Tpr/Smc4/Mki67/Bub1/Ube2s/Brca2/Zcwpw1/Slc25a31/Cks2/Hnrnpu/Top2a/Ran/Meioc/Sycp3/Tex12/Stag1/Ube2b/Nipbl/Cdc42/Dmc1/Nudc/Ddx4/Cul3/Cdk11b/Sycp2/Topbp1/Banf1/Stag3/Anapc5/Spdya/Top2b/Cdca8/Ranbp1/Kif23/Naa50/Ncapg2/Brdt/Tdrkh/Smc5/Tpx2/Kif2a/Tex11/Cenpe/Mael/Ankrd31/Vps4b/M1ap/Prdm9/Ncapg/Rhoa/Hspa2/Mov10l1/Akap8l/Mn…	100
GO:0050684	GO:0050684	regulation of mRNA processing	57/1569	150/28814	2.96032531897162e-33	1.20120892750579e-30	8.68441994383335e-31	Npm1/Ddx5/Ncl/Hspa8/Hnrnpa2b1/Fmr1/Srsf2/Rbm39/Srsf3/Hnrnpu/Cirbp/Srrm1/Ythdc1/Srsf7/Srsf9/Srsf10/Rbm25/Tra2a/Papola/Snrnp70/Qk/Nudt21/Hnrnpk/Iws1/Zc3h14/Rbm8a/Dhx36/Thrap3/Srsf6/Son/Acin1/Khdrbs1/Magoh/Fxr1/Rbmxl2/Nsrp1/Sltm/Adarb1/Sap18/Rnf20/Ddx17/Larp7/Celf1/Safb/Srpk1/Hnrnpl/Rbm5/Fxr2/Ctr9/Nelfe/Puf60/Celf2/Ahcyl1/Tra2b/Dazap1/Rnps1/Cdc73	57
GO:0048285	GO:0048285	organelle fission	104/1569	498/28814	4.46891754722051e-33	1.68382429011344e-30	1.21736002056992e-30	Tex15/Smc1b/Stra8/Dazl/Calr/Smc3/Syce3/Syce2/4930447C04Rik/Smarca5/Hormad1/Sycp1/Tpr/Smc4/Mki67/Bub1/Ube2s/Brca2/Zcwpw1/Slc25a31/Cks2/Hnrnpu/Top2a/Ran/Meioc/Sycp3/Tex12/Stag1/Ube2b/Nipbl/Cdc42/Dmc1/Nudc/Ddx4/Cul3/Cdk11b/Sycp2/Topbp1/Banf1/Stag3/Anapc5/Spdya/Top2b/Cdca8/Ranbp1/Kif23/Naa50/Ncapg2/Brdt/Rala/Tdrkh/Smc5/Tpx2/Kif2a/Tex11/Cenpe/Mael/Ankrd31/Vps35/Vps4b/M1ap/Prdm9/Ncapg/Rhoa/Hspa2/Mov10l…	104
GO:0043484	GO:0043484	regulation of RNA splicing	57/1569	163/28814	5.25232984000085e-31	1.84706932706697e-28	1.33538182528583e-28	Npm1/Ddx5/Ncl/Hspa8/Hnrnpa2b1/Fmr1/Srsf2/Rbm39/Hnrnpf/Srsf3/Hnrnpu/Cirbp/Srrm1/Polr2a/Ythdc1/Srsf7/Srsf9/Srsf10/Rbm25/Fus/Tra2a/Snrnp70/Qk/Hnrnph1/Cdk12/Hnrnpk/Rbm8a/Thrap3/Srsf6/Son/Acin1/Khdrbs1/Magoh/Srsf5/Fxr1/Brdt/Rbm17/Rbmxl2/Hnrnph3/Nsrp1/Srsf1/Sap18/Ddx17/Larp7/Celf1/Rrp1b/Hnrnpl/Rbm5/Fxr2/Tmbim6/Puf60/Grsf1/Setx/Celf2/Tra2b/Dazap1/Rnps1	57
GO:0009060	GO:0009060	aerobic respiration	57/1569	165/28814	1.10587942423293e-30	3.64594622676793e-28	2.6359218118394e-28	Cox7c/Cox5b/Uqcrh/Cox5a/Atp5j/Cox4i1/Atp5e/Uqcrb/Atp5b/Atp5h/Ndufa7/Cox7a2/Atp5j2/Ndufv2/Uqcc2/Park7/Atp5d/Cox7a2l/Ndufc2/Chchd2/Ndufs6/Ndufb6/Cyc1/Cox6a1/Vcp/Cycs/Uqcr10/Atp5a1/Atp5o/Ndufb9/Ndufa12/Dnajc15/Ndufb8/Atp5c1/Uqcrq/Rhoa/Cdk1/Slc25a33/Sdhb/Cyct/Mtch2/Ndufs4/Ndufv1/Ndufa10/Ndufa8/Ndufs7/Ndufs3/Chchd10/Dld/Hif1a/Sdhc/Atp5k/Mrps36/Uqcrfs1/Suclg1/Ndufs1/Sdha	57
GO:0006403	GO:0006403	RNA localization	58/1569	173/28814	2.13452334236748e-30	6.62330037116967e-28	4.78846939281571e-28	Npm1/Sem1/Ssb/Tpr/Hnrnpa2b1/Fmr1/Eif5a/Tomm20/Srsf3/Hnrnpu/Ran/Ybx1/Ckap5/Ythdc1/Alyref/Srsf7/Cct2/Hnrnpa3/Cct4/Atr/Fyttd1/Qk/Tcp1/Iws1/Nxf2/Dhx36/Eny2/Sarnp/Slbp/Alkbh5/Rae1/Khdrbs1/Magoh/Ranbp2/Pabpn1/Nup88/Senp2/Thoc2/Nup153/Nop58/Hnrnpa1/Srsf1/Akap8l/Thoc7/Ddx39b/Yy1/Xpo1/Mrpl18/Thoc1/Chtop/Cetn3/Casc3/Thoc3/Fbl/G3bp2/Nup54/Setd2/Nxt1	58
GO:0072594	GO:0072594	establishment of protein localization to organelle	91/1569	426/28814	7.70628891157132e-30	2.25837077825215e-27	1.63274179687853e-27	Ddx5/Tpr/Hspa8/Hsp90ab1/Hsp90aa1/Cct3/Tomm7/Brca2/Sec62/Tomm20/Ran/Dnaja1/Srp9/Cct8/Cfl1/Pdcd5/Hspa5/Dnajc19/Cct2/Nipbl/Cct4/Cct6a/Sumo1/Tcp1/Immp1l/Tomm70a/Hspd1/Sec61b/Spcs2/Hspa4/Srp19/Tomm22/Srp14/Ranbp2/Sec61g/Rala/Nup88/Dnajc15/Cct7/Timm13/Cct5/Pmpcb/Romo1/Sh3glb1/Sec63/Macf1/Nup153/Zfand6/Eif4enif1/Tsg101/Rab10/Pex13/Cdk1/Vps13a/Hikeshi/Ywhaz/Atf2/Fbxw7/Timm23/Pttg1ip/Mtch2/Pkig/Ssr3/Timm1…	91
GO:0046034	GO:0046034	ATP metabolic process	68/1569	263/28814	9.7775753300816e-28	2.71456367716739e-25	1.96255708702968e-25	Cox7c/Cox5b/Uqcrh/Cox5a/Atp5g2/Hspa8/Atp5j/Cox4i1/Atp5e/Uqcrb/Atp5l/Atp5b/Atp5h/Ndufa7/Cox7a2/Atp5j2/Ndufv2/Uqcc2/Park7/Atp5g1/Atp5d/Cox7a2l/Ndufc2/Chchd2/Ndufs6/Ndufb6/Cyc1/Cox6a1/Vcp/Cycs/Uqcr10/Atp5a1/Atp5o/Ndufb9/Ndufa12/Dnajc15/Ndufb8/Atp5g3/Atp5c1/Ola1/Uqcrq/Rhoa/Cdk1/Slc25a33/Parg/Cyct/Mtch2/Parp1/Ndufv1/Ndufa10/Ndufa8/Ndufs7/Ndufs3/Chchd10/Dld/Pkm/Hif1a/Sdhc/Ncor1/Atp5k/Zbtb20/Ep300/Uqcrf…	68
GO:0071826	GO:0071826	ribonucleoprotein complex subunit organization	54/1569	170/28814	4.52040165999236e-27	1.19225593782299e-24	8.61969221797492e-25	Snrpf/Snu13/Snrpe/Snrpg/Eif2s2/Hsp90ab1/Hsp90aa1/Snrpd1/Snrpd2/Ckap5/Mrpl20/Luc7l2/Psip1/Eif2s3y/Ptges3/Ythdc1/Srsf10/Atr/Nudt21/Lsm2/Luc7l3/Eif5/Snrpb/Eif3a/Lsm4/Strap/Snrpd3/Srsf6/Sf3b1/Denr/Vcp/Scaf11/Ramac/Kif5b/Srsf1/Luc7l/Snrpc/Ddx39b/Eif3d/Prpf8/Brix1/Celf1/Srpk1/Rbm5/Snrnp200/Sf3a3/Puf60/Setx/Celf2/Mdn1/Mrto4/Eif4b/Ruvbl1/Cdc73	54
GO:0006457	GO:0006457	protein folding	53/1569	167/28814	1.42149117850195e-26	3.57065046028467e-24	2.58148498231207e-24	Calr/Ppia/Prdx4/Hspa8/Hsp90ab1/Hsp90aa1/Cct3/Tbca/Hsp90b1/Dnaja1/Ppig/Fkbp6/Dnajc3/Cct8/Pdcd5/Hspa5/Ptges3/Cct2/Dnaja2/Nudc/Cct4/Pfdn2/Cct6a/Pfdn5/Nktr/Tcp1/Hspe1/Hspd1/Pdia3/Dnajc2/Hspa4/Hspa9/Ranbp2/Fkbp1a/Cct7/Cct5/Sh3glb1/Pfdn4/Selenof/Hspa4l/Hspa2/St13/Ppib/Dnajb11/Pfdn6/Dnajc10/Erp44/P4hb/Canx/Dnajc1/Chordc1/Clgn/Stub1	53
GO:0045333	GO:0045333	cellular respiration	61/1569	223/28814	1.90927946353832e-26	4.39800979429847e-24	3.17964369862676e-24	Cox7c/Cox5b/Uqcrh/Cox5a/Atp5j/Cox4i1/Atp5e/Uqcrb/Atp5b/Atp5h/Ndufa7/Cox7a2/Atp5j2/Ndufv2/Uqcc2/Park7/Ndufa5/Atp5d/Cox7a2l/Ndufc2/Chchd2/Etfa/Ndufs6/Ndufb6/Cyc1/Sod2/Cox6a1/Cisd1/Vcp/Cycs/Uqcr10/Atp5a1/Atp5o/Ndufb9/Ndufa12/Dnajc15/Ndufb8/Atp5c1/Uqcrq/Rhoa/Cdk1/Slc25a33/Sdhb/Cyct/Mtch2/Ndufs4/Ndufv1/Ndufa10/Ndufa8/Ndufs7/Ndufs3/Chchd10/Dld/Hif1a/Sdhc/Atp5k/Mrps36/Uqcrfs1/Suclg1/Ndufs1/Sdha	61
GO:0042775	GO:0042775	mitochondrial ATP synthesis coupled electron transport	35/1569	68/28814	1.91761564490739e-26	4.39800979429847e-24	3.17964369862676e-24	Cox7c/Cox5b/Uqcrh/Cox5a/Cox4i1/Uqcrb/Ndufa7/Ndufv2/Park7/Ndufc2/Chchd2/Ndufs6/Ndufb6/Cyc1/Cox6a1/Cycs/Uqcr10/Ndufb9/Ndufa12/Dnajc15/Ndufb8/Uqcrq/Cdk1/Cyct/Mtch2/Ndufv1/Ndufa10/Ndufa8/Ndufs7/Ndufs3/Dld/Sdhc/Uqcrfs1/Ndufs1/Sdha	35
GO:0022618	GO:0022618	ribonucleoprotein complex assembly	52/1569	162/28814	2.31138033203144e-26	5.08022135477744e-24	3.67286444866224e-24	Snrpf/Snu13/Snrpe/Snrpg/Eif2s2/Hsp90ab1/Hsp90aa1/Snrpd1/Snrpd2/Ckap5/Mrpl20/Luc7l2/Psip1/Eif2s3y/Ptges3/Ythdc1/Srsf10/Atr/Nudt21/Lsm2/Luc7l3/Eif5/Snrpb/Eif3a/Lsm4/Strap/Snrpd3/Srsf6/Sf3b1/Denr/Scaf11/Ramac/Srsf1/Luc7l/Snrpc/Ddx39b/Eif3d/Prpf8/Brix1/Celf1/Srpk1/Rbm5/Snrnp200/Sf3a3/Puf60/Setx/Celf2/Mdn1/Mrto4/Eif4b/Ruvbl1/Cdc73	52
GO:0022900	GO:0022900	electron transport chain	42/1569	104/28814	4.160593183394e-26	8.77885161696135e-24	6.34687541197325e-24	Cox7c/Cox5b/Uqcrh/Cox5a/Cox4i1/Uqcrb/Ndufa7/Ndufv2/Park7/Ndufa5/Ndufc2/Chchd2/Etfa/Ndufs6/Ndufb6/Cyc1/Sod2/Cox6a1/Cycs/Uqcr10/Ndufb9/Ndufa12/Dnajc15/Ndufb8/Ndufb3/Uqcrq/Cdk1/Sdhb/Cyct/Mtch2/Ndufs4/Ndufv1/Ndufa10/Ndufa8/Ndufs7/Ndufs3/Dld/Sdhc/Fdx1/Uqcrfs1/Ndufs1/Sdha	42
GO:0022904	GO:0022904	respiratory electron transport chain	40/1569	94/28814	5.59467034818291e-26	1.1350725417948e-23	8.20627152690959e-24	Cox7c/Cox5b/Uqcrh/Cox5a/Cox4i1/Uqcrb/Ndufa7/Ndufv2/Park7/Ndufa5/Ndufc2/Chchd2/Etfa/Ndufs6/Ndufb6/Cyc1/Sod2/Cox6a1/Cycs/Uqcr10/Ndufb9/Ndufa12/Dnajc15/Ndufb8/Uqcrq/Cdk1/Sdhb/Cyct/Mtch2/Ndufs4/Ndufv1/Ndufa10/Ndufa8/Ndufs7/Ndufs3/Dld/Sdhc/Uqcrfs1/Ndufs1/Sdha	40
GO:0042773	GO:0042773	ATP synthesis coupled electron transport	35/1569	70/28814	6.99774569719316e-26	1.36715216861829e-23	9.8841452869126e-24	Cox7c/Cox5b/Uqcrh/Cox5a/Cox4i1/Uqcrb/Ndufa7/Ndufv2/Park7/Ndufc2/Chchd2/Ndufs6/Ndufb6/Cyc1/Cox6a1/Cycs/Uqcr10/Ndufb9/Ndufa12/Dnajc15/Ndufb8/Uqcrq/Cdk1/Cyct/Mtch2/Ndufv1/Ndufa10/Ndufa8/Ndufs7/Ndufs3/Dld/Sdhc/Uqcrfs1/Ndufs1/Sdha	35
GO:0048024	GO:0048024	regulation of mRNA splicing, via spliceosome	43/1569	112/28814	1.24742437677163e-25	2.35005842409655e-23	1.69902951768557e-23	Npm1/Ddx5/Ncl/Hspa8/Hnrnpa2b1/Fmr1/Srsf2/Rbm39/Srsf3/Hnrnpu/Cirbp/Srrm1/Ythdc1/Srsf7/Srsf9/Srsf10/Rbm25/Tra2a/Snrnp70/Qk/Hnrnpk/Rbm8a/Thrap3/Srsf6/Son/Acin1/Khdrbs1/Magoh/Fxr1/Rbmxl2/Nsrp1/Sap18/Ddx17/Larp7/Celf1/Hnrnpl/Rbm5/Fxr2/Puf60/Celf2/Tra2b/Dazap1/Rnps1	43
GO:0019646	GO:0019646	aerobic electron transport chain	31/1569	54/28814	1.58146643792655e-25	2.87663291726295e-23	2.07972882199924e-23	Cox7c/Cox5b/Uqcrh/Cox5a/Cox4i1/Uqcrb/Ndufa7/Ndufv2/Park7/Ndufc2/Ndufs6/Ndufb6/Cyc1/Cox6a1/Cycs/Uqcr10/Ndufb9/Dnajc15/Ndufb8/Uqcrq/Cyct/Ndufv1/Ndufa10/Ndufa8/Ndufs7/Ndufs3/Dld/Sdhc/Uqcrfs1/Ndufs1/Sdha	31
GO:0051236	GO:0051236	establishment of RNA localization	49/1569	152/28814	5.14876383388356e-25	9.05324307457859e-23	6.54525311233689e-23	Npm1/Sem1/Ssb/Tpr/Hnrnpa2b1/Fmr1/Eif5a/Tomm20/Srsf3/Ran/Ybx1/Ythdc1/Alyref/Srsf7/Hnrnpa3/Atr/Fyttd1/Qk/Iws1/Nxf2/Eny2/Sarnp/Slbp/Alkbh5/Rae1/Khdrbs1/Magoh/Ranbp2/Pabpn1/Nup88/Senp2/Thoc2/Nup153/Hnrnpa1/Srsf1/Akap8l/Thoc7/Ddx39b/Xpo1/Mrpl18/Thoc1/Chtop/Cetn3/Casc3/Thoc3/G3bp2/Nup54/Setd2/Nxt1	49
GO:0006417	GO:0006417	regulation of translation	80/1569	395/28814	9.16836197815836e-25	1.56010030434791e-22	1.12791088104814e-22	Npm1/Dazl/Calr/Ncl/Rack1/Eif5b/Tpr/Fmr1/Rock1/Eif5a/Cnbp/Hnrnpu/Ybx1/Cirbp/Srp9/Eif4g2/Paip2/Rock2/Dnajc3/Tut4/Pabpc1/Eif2s3y/Etf1/Eif2s1/Bzw1/Uqcc2/Qk/Eif3e/Zfp706/Tmed2/Gspt1/Eif5/Caprin2/Dhx36/Sarnp/Eprs/Larp4/Tnrc6c/Usp16/Hnrnpr/Caprin1/Khdrbs1/Csde1/Larp1b/Eif4e/Magoh/Fxr1/Ddx6/Malsu1/Syncrip/Eif4enif1/Eef2/Ythdf2/Gigyf2/Ddx39b/Hnrnpd/Eif3d/Ilf3/Celf1/Eif3k/Mettl16/Polr2g/Hnrnpl/Ppp1ca/Pa2g4…	80
GO:0050657	GO:0050657	nucleic acid transport	48/1569	149/28814	1.61821483772927e-24	2.58669189970361e-22	1.8701092048144e-22	Npm1/Sem1/Ssb/Tpr/Hnrnpa2b1/Fmr1/Eif5a/Tomm20/Srsf3/Ran/Ybx1/Ythdc1/Alyref/Srsf7/Hnrnpa3/Fyttd1/Qk/Iws1/Nxf2/Eny2/Sarnp/Slbp/Alkbh5/Rae1/Khdrbs1/Magoh/Ranbp2/Pabpn1/Nup88/Senp2/Thoc2/Nup153/Hnrnpa1/Srsf1/Akap8l/Thoc7/Ddx39b/Xpo1/Mrpl18/Thoc1/Chtop/Cetn3/Casc3/Thoc3/G3bp2/Nup54/Setd2/Nxt1	48
GO:0050658	GO:0050658	RNA transport	48/1569	149/28814	1.61821483772927e-24	2.58669189970361e-22	1.8701092048144e-22	Npm1/Sem1/Ssb/Tpr/Hnrnpa2b1/Fmr1/Eif5a/Tomm20/Srsf3/Ran/Ybx1/Ythdc1/Alyref/Srsf7/Hnrnpa3/Fyttd1/Qk/Iws1/Nxf2/Eny2/Sarnp/Slbp/Alkbh5/Rae1/Khdrbs1/Magoh/Ranbp2/Pabpn1/Nup88/Senp2/Thoc2/Nup153/Hnrnpa1/Srsf1/Akap8l/Thoc7/Ddx39b/Xpo1/Mrpl18/Thoc1/Chtop/Cetn3/Casc3/Thoc3/G3bp2/Nup54/Setd2/Nxt1	48
GO:0006310	GO:0006310	DNA recombination	71/1569	321/28814	1.75567945788166e-24	2.72388504127227e-22	1.96929618449079e-22	Tex15/Sem1/Syce3/4930447C04Rik/Sycp1/Actb/Hmgb1/Brca2/Zcwpw1/Sfr1/Smc6/Top2a/Swi5/Rif1/Sycp3/Alyref/Ube2b/Hmgb2/Nipbl/Kdm1a/Dmc1/Fus/Sfpq/Rnf138/Topbp1/Hspd1/Rbbp8/Top2b/Nsd2/Ppp4r2/Nabp1/Atad5/Morf4l1/Xrn2/Smchd1/Ube2n/Rad50/Mrgbp/Smc5/Ezh2/Tex11/Lig1/Ankrd31/Ep400/Hdgfl2/Prdm9/Nucks1/Mbtd1/Psmd14/Lig3/Mnd1/Rev3l/Yy1/Meiob/Ndfip1/Parp1/Rad18/Mcm5/Fignl1/Thoc1/Psmc3ip/Hfm1/Mcm8/Morf4l2/Setx/Kmt5b…	71
GO:0000819	GO:0000819	sister chromatid segregation	54/1569	190/28814	1.92949675006507e-24	2.90802724474093e-22	2.10242608285286e-22	Smc1b/Smc3/Smarca5/Hormad1/Tpr/Smc4/Bub1/Esco2/Hnrnpu/Top2a/Ran/Sycp3/Stag1/Nipbl/Nudc/Sfpq/Cul3/Wapl/Stag3/Anapc5/Top2b/Cdca8/Kif23/Naa50/Ncapg2/Smc5/Cenpe/Esco1/Vps4b/Ncapg/Akap8l/Fbxw7/Ctnnb1/Ik/Prc1/Baz1b/Smc2/Cdc20/Chmp4b/Slf1/Pds5a/Eml4/Phb2/Cenpk/Tex14/Rab11a/Ncapd3/Pds5b/Sgo2a/Apc/Anapc11/Slf2/Zfp207/Becn1	54
GO:0006402	GO:0006402	mRNA catabolic process	61/1569	243/28814	2.82768478608239e-24	4.14334367960683e-22	2.99552689472997e-22	Npm1/Dazl/Ddx5/Ssb/Fmr1/Rock1/Taf15/Hnrnpu/Ybx1/Cirbp/Rock2/Tut4/Meioc/Pabpc1/Hnrnpab/Etf1/Fus/Qk/Eif3e/Lsm2/Gspt1/Zc3h14/Rbm8a/Dhx36/Thrap3/Lsm4/Tnrc6c/Alkbh5/Hnrnpr/Lsm5/Rbm46/Csde1/Xrn2/Magoh/Hnrnpa0/Fxr1/Syncrip/Lsm6/Eif4enif1/Lsm3/Srsf1/Ythdf2/Gigyf2/Hnrnpd/Celf1/Mettl16/Polr2g/Lsm7/Fxr2/Paip1/Cnot6l/Tnrc6b/Casc3/Tardbp/Angel2/Exosc8/Rc3h2/Samd4b/Mrto4/Hnrnpm/Rnps1	61
GO:1903312	GO:1903312	negative regulation of mRNA metabolic process	39/1569	97/28814	2.95582677309693e-24	4.21405033191522e-22	3.04664591719208e-22	Npm1/Dazl/Hnrnpa2b1/Fmr1/Taf15/Hnrnpu/Ybx1/Cirbp/Meioc/Hnrnpab/Srsf7/Srsf9/Srsf10/Fus/Qk/Hnrnpk/Zc3h14/Thrap3/Srsf6/Hnrnpc/Acin1/Rbm46/Csde1/Hnrnpa0/Syncrip/Eif4enif1/Srsf1/Sap18/Rnf20/Hnrnpd/Mettl16/Hnrnpl/Paip1/Ctr9/Tardbp/Angel2/Nelfe/Tra2b/Rnps1	39
GO:0006401	GO:0006401	RNA catabolic process	66/1569	285/28814	4.99218866051943e-24	6.92994610111578e-22	5.01016607120828e-22	Npm1/Dazl/Ddx5/Ssb/Fmr1/Rock1/Taf15/Hnrnpu/Ybx1/Cirbp/Rock2/Tut4/Meioc/Pabpc1/Hnrnpab/Etf1/Fus/Qk/Eif3e/Lsm2/Gspt1/Zc3h14/Rbm8a/Dhx36/Thrap3/Lsm4/Tnrc6c/Alkbh5/Hnrnpr/Lsm5/Rbm46/Csde1/Xrn2/Magoh/Hnrnpa0/Fxr1/Trir/Syncrip/Lsm6/Slirp/Eif4enif1/Lsm3/Srsf1/Ythdf2/Gigyf2/Hnrnpd/Celf1/Mettl16/Polr2g/Lsm7/Fxr2/Paip1/Cnot6l/Tnrc6b/Casc3/Tardbp/Angel2/Exosc8/Grsf1/Rc3h2/Samd4b/Mtrex/Mrto4/Hnrnpm/Zc3h18/Rn…	66
GO:2000112	GO:2000112	regulation of cellular macromolecule biosynthetic process	88/1569	481/28814	6.96670880499237e-24	9.41859105582881e-22	6.80938995166232e-22	Npm1/Dazl/Calr/Ncl/Rack1/Eif5b/Tpr/Fmr1/Rock1/Eif5a/Dbi/Cnbp/Hnrnpu/Ybx1/Cirbp/Srp9/Eif4g2/Paip2/Rock2/Dnajc3/Tut4/Pabpc1/Eif2s3y/Etf1/Eif2s1/Bzw1/Uqcc2/Qk/Eif3e/Zfp706/Tmed2/Gspt1/Eif5/Caprin2/Dhx36/Rb1cc1/Sarnp/Eprs/Larp4/Tnrc6c/Usp16/Hnrnpr/Caprin1/Khdrbs1/Csde1/Larp1b/Eif4e/Magoh/Fxr1/Ddx6/Malsu1/Tmem59/Syncrip/Eif4enif1/Eef2/Ythdf2/Gigyf2/Ddx39b/Hnrnpd/Eif3d/Ctnnb1/Ilf3/Celf1/Eif3k/Mettl16/P…	88
GO:0034248	GO:0034248	regulation of cellular amide metabolic process	85/1569	453/28814	7.142059568401e-24	9.41859105582881e-22	6.80938995166232e-22	Npm1/Dazl/Calr/Ncl/Rack1/Eif5b/Tpr/Fmr1/Rock1/Eif5a/Cnbp/Hnrnpu/Ybx1/Cirbp/Srp9/Eif4g2/Paip2/Rock2/Dnajc3/Tut4/Pabpc1/Eif2s3y/Etf1/Eif2s1/Bzw1/Uqcc2/Qk/Eif3e/Zfp706/Tmed2/Gspt1/Eif5/Caprin2/Dhx36/Sarnp/Eprs/Larp4/Tnrc6c/Rtn3/Tmed10/Usp16/Hnrnpr/Rtn4/Caprin1/Khdrbs1/Csde1/Larp1b/Eif4e/Magoh/Fxr1/Ddx6/Malsu1/Pin1/Syncrip/Eif4enif1/Eef2/Ythdf2/Gigyf2/Ddx39b/Hnrnpd/Eif3d/Ilf3/Celf1/Eif3k/Mettl16/Polr…	85
GO:0015980	GO:0015980	energy derivation by oxidation of organic compounds	68/1569	312/28814	4.0805465994993e-23	5.24997153959971e-21	3.79558930166521e-21	Cox7c/Cox5b/Uqcrh/Cox5a/Hmgb1/Atp5j/Cox4i1/Atp5e/Uqcrb/Atp5b/Atp5h/Ndufa7/Cox7a2/Ppp1r2/Atp5j2/Ptges3/Ndufv2/Uqcc2/Park7/Ndufa5/Atp5d/Cox7a2l/Ndufc2/Gnas/Chchd2/Etfa/Ndufs6/Ndufb6/Cyc1/Sod2/Rb1cc1/Cox6a1/Cisd1/Vcp/Cycs/Uqcr10/Atp5a1/Atp5o/Ndufb9/Ndufa12/Dnajc15/Ndufb8/Atp5c1/Uqcrq/Rhoa/Cdk1/Slc25a33/Sdhb/Cyct/Mtch2/Ndufs4/Ndufv1/Ndufa10/Ndufa8/Ndufs7/Ndufs3/Chchd10/Ppp1cb/Dld/Ppp1ca/Hif1a/Sdhc/At…	68
GO:0006302	GO:0006302	double-strand break repair	62/1569	267/28814	1.02145508924417e-22	1.28289895137215e-20	9.27501701336251e-21	Tex15/Sem1/4930447C04Rik/Actb/Brca2/Zcwpw1/Sfr1/Esco2/Smc6/Swi5/Rif1/Meioc/Dek/Nipbl/Kdm1a/Dmc1/Fus/Sfpq/Rnf138/Rbbp8/Nsd2/Ppp4r2/Nabp1/Vcp/Trip12/Morf4l1/Smchd1/Ube2n/Rad50/Hpf1/Mrgbp/Smc5/Lig1/Ep400/Hdgfl2/Prdm9/Nucks1/Ppp4r3b/Mbtd1/Psmd14/Tdp2/Ube2v2/Lig3/Rev3l/Yy1/Meiob/Parp1/Mcm5/Ubr5/Kdm2a/Fignl1/Slf1/Mcm8/Morf4l2/Setx/Kmt5b/Slf2/Brip1/Setd2/Ppp4c/Smarcad1/Ruvbl1	62
GO:0043161	GO:0043161	proteasome-mediated ubiquitin-dependent protein catabolic process	80/1569	430/28814	2.70619130254467e-22	3.31980444672631e-20	2.40013000957633e-20	Calr/Rack1/Sumo2/Hsp90ab1/Ube2s/Pcbp2/Hsp90b1/Rbx1/Cd2ap/Cul1/Ubxn1/Hspa5/Ube2b/Ube2d3/Psmd1/Park7/Sumo1/Cul3/Ubxn4/Rnf34/Sec61b/Anapc5/Huwe1/Erlec1/Rnf216/Ube2k/Vcp/Trip12/Smarcc1/Psmd2/Fbxl5/Rnf4/Psmd4/Psmc6/Appbp2/Hectd1/Eif3h/Ube2j2/Psmd14/Ube2v2/Psmb5/Ascc3/Psma5/Fbxw7/Rybp/Cul4b/Anapc10/Dtl/Ctnnb1/Cul5/Dnajc10/Xpo1/Cdc20/Canx/Usp7/Nsfl1c/Nedd4/Usp19/Psmc3/Ubxn2a/Faf2/Gclc/Anapc11/Peli1/Psmd…	80
GO:0051028	GO:0051028	mRNA transport	40/1569	118/28814	1.36952314230984e-21	1.64187149447373e-19	1.18702926904032e-19	Sem1/Tpr/Hnrnpa2b1/Fmr1/Eif5a/Srsf3/Ythdc1/Alyref/Srsf7/Hnrnpa3/Fyttd1/Qk/Iws1/Nxf2/Eny2/Sarnp/Slbp/Alkbh5/Rae1/Magoh/Ranbp2/Pabpn1/Nup88/Senp2/Thoc2/Hnrnpa1/Srsf1/Akap8l/Thoc7/Ddx39b/Xpo1/Thoc1/Chtop/Cetn3/Casc3/Thoc3/G3bp2/Nup54/Setd2/Nxt1	40
GO:0051054	GO:0051054	positive regulation of DNA metabolic process	64/1569	299/28814	2.1640659366574e-21	2.53676618130396e-19	1.83401424292626e-19	Npm1/Smarca5/Actb/Hsp90ab1/Hsp90aa1/Cacybp/Hmgb1/Cct3/Hnrnpa2b1/Zcwpw1/Rif1/Cct8/Ptges3/Ube2b/Cct2/Cdc42/Cct4/Fus/Atr/Cct6a/Cst3/Tcp1/Rfc4/Pcna/Rbbp8/Dhx36/Usp9x/Nsd2/Atad5/Morf4l1/Smchd1/Ube2n/Rad50/Mrgbp/Cct7/Cct5/Ep400/Hdgfl2/Prdm9/Pfn1/Mbtd1/Ube2v2/Cdk1/Rac1/Otud4/Ddx39b/Hnrnpd/Parg/Yy1/Ctnnb1/Parp1/Atf1/Dbf4/Slf1/Usp7/Gnl3/Trim28/Faf1/Morf4l2/Sirt1/Kmt5b/Slf2/Oga/Ruvbl1	64
GO:0006913	GO:0006913	nucleocytoplasmic transport	68/1569	334/28814	2.2858241447811e-21	2.56547284334474e-19	1.85476839340245e-19	Npm1/Calr/Ddx5/Sem1/Ssb/Tpr/Hspa8/Hsp90ab1/Hnrnpa2b1/Anp32b/Srsf3/Ran/Cfl1/Ythdc1/Alyref/Fyttd1/Park7/Sumo1/Iws1/Ywhae/Nxf2/Eny2/Sarnp/Cited1/Alkbh5/Rae1/Khdrbs1/Hspa9/Ppp1r12a/Ranbp2/Pabpn1/Nup88/Thoc2/Nup153/Eif4enif1/Nmd3/Cdk1/Hikeshi/Akap8l/Atf2/Thoc7/Ddx39b/Rab18/Pttg1ip/Pkig/Appl1/Ubr5/Xpo1/Ltv1/Thoc1/Chtop/Nedd4/Phb2/Kpna4/Tardbp/Thoc3/Ppp2ca/Sdad1/Trim28/Mdm2/Nup54/Ctdspl2/Ahcyl1/Kpna3/Se…	68
GO:0051169	GO:0051169	nuclear transport	68/1569	334/28814	2.2858241447811e-21	2.56547284334474e-19	1.85476839340245e-19	Npm1/Calr/Ddx5/Sem1/Ssb/Tpr/Hspa8/Hsp90ab1/Hnrnpa2b1/Anp32b/Srsf3/Ran/Cfl1/Ythdc1/Alyref/Fyttd1/Park7/Sumo1/Iws1/Ywhae/Nxf2/Eny2/Sarnp/Cited1/Alkbh5/Rae1/Khdrbs1/Hspa9/Ppp1r12a/Ranbp2/Pabpn1/Nup88/Thoc2/Nup153/Eif4enif1/Nmd3/Cdk1/Hikeshi/Akap8l/Atf2/Thoc7/Ddx39b/Rab18/Pttg1ip/Pkig/Appl1/Ubr5/Xpo1/Ltv1/Thoc1/Chtop/Nedd4/Phb2/Kpna4/Tardbp/Thoc3/Ppp2ca/Sdad1/Trim28/Mdm2/Nup54/Ctdspl2/Ahcyl1/Kpna3/Se…	68
GO:0006260	GO:0006260	DNA replication	61/1569	277/28814	4.10406805215979e-21	4.51019978648811e-19	3.26075406863485e-19	Npm1/Stra8/Smc3/Nasp/Smarca5/Cacybp/Brca2/Tipin/Esco2/Alyref/Supt16/Cdc42/Atr/Cst3/Top1/Topbp1/Rfc4/Wapl/Pcna/Bod1l/Dnajc2/Atad5/Ccdc88a/Rad17/Orc6/Pole4/Senp2/Rbbp6/Rbbp7/Ankrd17/Lig1/Esco1/Nucks1/Orc2/Cdk1/Gmnn/Rac1/Rbbp4/Usp37/Lig3/Rev3l/Dtl/Pura/Yy1/Mcm5/Atf1/Dbf4/Pole3/Ddx21/Ccne2/Thoc1/Gtpbp4/Pds5a/Cinp/Prim1/Mcm8/Faf1/Pole/Jade3/Orc4/Ruvbl1	61
GO:1903046	GO:1903046	meiotic cell cycle process	54/1569	221/28814	4.70380768306803e-21	5.06379296493548e-19	3.66098716127937e-19	Tex15/Stra8/Dazl/Calr/Syce3/Syce2/4930447C04Rik/Hormad1/Sycp1/Smc4/Bub1/Brca2/Zcwpw1/Slc25a31/Cks2/Top2a/Meioc/Sycp3/Tex12/Ube2b/Dmc1/Ddx4/Sycp2/Topbp1/Stag3/Spdya/Top2b/Rad50/Brdt/Tdrkh/Tex11/Cenpe/Mael/Ankrd31/M1ap/Prdm9/Hspa2/Ythdf2/Mov10l1/Mnd1/Psma8/Meiob/Smc2/Cdc20/Fignl1/Ccne2/Topaz1/Mybl1/Psmc3ip/Hfm1/Tex14/Ncapd3/Sgo2a/Brip1	54
GO:0006338	GO:0006338	chromatin remodeling	55/1569	229/28814	4.86497188569006e-21	5.13254533940301e-19	3.71069329302212e-19	Npm1/H3f3b/Ptma/Nasp/H3f3a/Hells/Smarca5/Anp32b/1700013H16Rik/Nap1l1/Kdm5b/Sycp3/Kdm5a/Supt16/Top1/Chd4/Pbrm1/Set/Morf4l1/Smarcc1/Hdac1/Brd2/Jarid2/Smarce1/Brdt/Baz2a/Rbbp7/Npm3/Bptf/Smarca4/Chd6/Rbbp4/Cenpp/Gatad2a/Nap1l4/Dnajc9/Pak1/Yy1/Asf1b/Baz1b/Pole3/Mier1/Smarcd1/Xlr/Cecr2/Hdac2/Dr1/Chd8/Gatad1/Cfdp1/Setd2/Smarcad1/Chd3/Shprh/Ruvbl1	55
GO:0006091	GO:0006091	generation of precursor metabolites and energy	78/1569	436/28814	1.08898660119802e-20	1.12635378849403e-18	8.14323726757568e-19	Cox7c/Cox5b/Uqcrh/Cox5a/Ndufa4/Hmgb1/Atp5j/Cox4i1/Atp5e/Uqcrb/Atp5b/Atp5h/Ndufa7/Cox7a2/Ppp1r2/Atp5j2/Ptges3/Ndufv2/Uqcc2/Park7/Ndufa5/Atp5d/Cox7a2l/Ndufc2/Gnas/Chchd2/Etfa/Ndufs6/Ndufb6/Cyc1/Sod2/Rb1cc1/Cox6a1/Cox17/Cisd1/Vcp/Cycs/Uqcr10/Atp5a1/Atp5o/Ndufb9/Ndufa12/Dnajc15/Ndufb8/Atp5c1/Ndufb3/Uqcrq/Rhoa/Cdk1/Slc25a33/Sdhb/Cyct/Mtch2/Ndufs4/Ndufv1/Ndufa10/Ndufa8/Ndufs7/Ndufs3/Chchd10/Ppp1cb/Dld/…	78
GO:0140013	GO:0140013	meiotic nuclear division	51/1569	202/28814	1.22985246825059e-20	1.2475907250042e-18	9.01974796046938e-19	Tex15/Stra8/Dazl/Calr/Syce3/Syce2/4930447C04Rik/Hormad1/Sycp1/Smc4/Bub1/Brca2/Zcwpw1/Slc25a31/Cks2/Top2a/Meioc/Sycp3/Tex12/Ube2b/Dmc1/Ddx4/Sycp2/Topbp1/Stag3/Spdya/Top2b/Brdt/Tdrkh/Tex11/Cenpe/Mael/Ankrd31/M1ap/Prdm9/Hspa2/Mov10l1/Mnd1/Psma8/Meiob/Smc2/Cdc20/Fignl1/Ccne2/Mybl1/Psmc3ip/Hfm1/Tex14/Ncapd3/Sgo2a/Brip1	51
GO:0090068	GO:0090068	positive regulation of cell cycle process	59/1569	267/28814	1.52600359168094e-20	1.5188054615315e-18	1.09805581184906e-18	Npm1/Stra8/Dazl/Tpr/Smc4/Anp32b/Hnrnpu/Rock2/Ube2b/Cdc42/Sfpq/Cul3/Pkn2/Anapc5/Atad5/Ranbp1/Kif23/Ncapg2/Smc5/Ezh2/Ankrd17/Cenpe/Ankrd31/Vps4b/Prdm9/Ncapg/Rhoa/Cdk1/Hspa2/Ddx39b/Spast/Cul4b/Kmt2e/Dtl/Larp7/Kif20b/Smc2/Dbf4/Dync1h1/Slf1/Cep295/Thoc1/Topaz1/Nsfl1c/Phb2/Usp19/Rab11a/Ncapd3/Cspp1/Sgo2a/Anapc11/Plk4/Mdm2/Rdx/App/Slf2/Eif4g1/Becn1/Cdc73	59
GO:0045787	GO:0045787	positive regulation of cell cycle	69/1569	355/28814	1.73685227359498e-20	1.69664735985435e-18	1.22663075774554e-18	Npm1/Stra8/Dazl/Calr/Tpr/Smc4/Pafah1b1/Hmgb1/Brca2/Anp32b/Hnrnpu/Rock2/Meioc/Ube2b/Cdc42/Sfpq/Cul3/Pkn2/Ythdc2/Anapc5/Spdya/Atad5/Ranbp1/Kif23/Eif4e/Ncapg2/Smc5/Ezh2/Ankrd17/Cenpe/Ankrd31/Vps4b/Prdm9/Ncapg/Rhoa/Cdk1/Hspa2/Ddx39b/Spast/Cul4b/Kmt2e/Dtl/Larp7/Kif20b/Smc2/Dbf4/Dync1h1/Slf1/Cep295/Thoc1/Topaz1/Nsfl1c/Phb2/Usp19/Rab11a/Ncapd3/Cspp1/Sgo2a/Anapc11/Plk4/Mdm2/Rdx/BC004004/Lrp6/App/Slf2/Eif…	69
GO:0010257	GO:0010257	NADH dehydrogenase complex assembly	28/1569	58/28814	1.91101384169103e-20	1.8001067883786e-18	1.30142916324184e-18	Ndufab1/Ndufs5/Ndufb7/Ndufa1/Ndufa5/Ndufa6/Ndufb4/Ndufc2/Ndufa2/Ndufs6/Ndufb6/Ndufa11/Ndufb5/Ndufb9/Ndufa12/Ndufb8/Ndufc1/Ndufaf8/Ndufb3/Ndufa3/Ndufb10/Ndufs4/Ndufa10/Ndufa8/Ndufs7/Ndufs3/Ndufb2/Ndufs1	28
GO:0032981	GO:0032981	mitochondrial respiratory chain complex I assembly	28/1569	58/28814	1.91101384169103e-20	1.8001067883786e-18	1.30142916324184e-18	Ndufab1/Ndufs5/Ndufb7/Ndufa1/Ndufa5/Ndufa6/Ndufb4/Ndufc2/Ndufa2/Ndufs6/Ndufb6/Ndufa11/Ndufb5/Ndufb9/Ndufa12/Ndufb8/Ndufc1/Ndufaf8/Ndufb3/Ndufa3/Ndufb10/Ndufs4/Ndufa10/Ndufa8/Ndufs7/Ndufs3/Ndufb2/Ndufs1	28
GO:0015931	GO:0015931	nucleobase-containing compound transport	50/1569	197/28814	2.29096766923061e-20	2.12014990441955e-18	1.53281179420545e-18	Npm1/Sem1/Ssb/Tpr/Hnrnpa2b1/Fmr1/Slc25a31/Eif5a/Tomm20/Srsf3/Ran/Ybx1/Ythdc1/Alyref/Srsf7/Hnrnpa3/Fyttd1/Qk/Iws1/Nxf2/Eny2/Sarnp/Slbp/Alkbh5/Rae1/Khdrbs1/Magoh/Ranbp2/Pabpn1/Nup88/Senp2/Thoc2/Nup153/Hnrnpa1/Srsf1/Slc25a33/Akap8l/Thoc7/Ddx39b/Xpo1/Mrpl18/Thoc1/Chtop/Cetn3/Casc3/Thoc3/G3bp2/Nup54/Setd2/Nxt1	50
GO:0051321	GO:0051321	meiotic cell cycle	66/1569	334/28814	4.74208422829033e-20	4.31284384555715e-18	3.1180709907615e-18	Tex15/Smc1b/Stra8/Dazl/Calr/Smc3/Syce3/Syce2/4930447C04Rik/Hormad1/Sycp1/Smc4/Mki67/Bub1/Brca2/Zcwpw1/Slc25a31/1700013H16Rik/Cks2/Top2a/Fkbp6/Meioc/Sycp3/Tex12/Ube2b/Dmc1/Ddx4/Sycp2/Topbp1/Ythdc2/Rbbp8/Stag3/Spdya/Top2b/Zfp318/Rad50/Brdt/Tdrkh/Tex11/Cenpe/Mael/Ankrd31/M1ap/Prdm9/Hspa2/Ythdf2/Mov10l1/Mnd1/Psma8/Meiob/Smc2/Cdc20/Fignl1/Rsph1/Ccne2/Topaz1/Mybl1/Psmc3ip/Hfm1/Tex14/Xlr/Ppp2ca/Ncapd3/S…	66
GO:0033044	GO:0033044	regulation of chromosome organization	51/1569	208/28814	4.94889306257616e-20	4.42464591611682e-18	3.19890090378473e-18	H3f3b/H3f3a/Smarca5/Mphosph8/Tpr/Smc4/Bub1/Cct3/Hnrnpa2b1/Hnrnpu/Top2a/Cct8/Cct2/Cct4/Sfpq/Atr/Setdb1/Cct6a/Cul3/Senp6/Tcp1/Wapl/Dhx36/Anapc5/Pphln1/Rad50/Cct7/Rnf4/Smc5/Cct5/Cenpe/Ncapg/Hnrnpd/Yy1/Ctnnb1/Ik/Parp1/Baz1b/Smc2/Atf7ip2/Slf1/Gnl3/Tex14/Trim28/Sgo2a/Apc/Anapc11/Slf2/Zfp207/Becn1/Ruvbl1	51
GO:0061013	GO:0061013	regulation of mRNA catabolic process	47/1569	178/28814	5.41010237336053e-20	4.7563816699128e-18	3.43873699976934e-18	Npm1/Dazl/Fmr1/Rock1/Taf15/Hnrnpu/Ybx1/Cirbp/Rock2/Tut4/Meioc/Pabpc1/Hnrnpab/Fus/Qk/Zc3h14/Rbm8a/Dhx36/Thrap3/Tnrc6c/Alkbh5/Hnrnpr/Rbm46/Csde1/Magoh/Hnrnpa0/Fxr1/Syncrip/Eif4enif1/Srsf1/Ythdf2/Gigyf2/Hnrnpd/Celf1/Mettl16/Polr2g/Fxr2/Paip1/Cnot6l/Tnrc6b/Casc3/Tardbp/Angel2/Exosc8/Rc3h2/Samd4b/Hnrnpm	47
GO:0000380	GO:0000380	alternative mRNA splicing, via spliceosome	31/1569	76/28814	8.67771270784051e-20	7.50408762850143e-18	5.42525507170081e-18	Ddx5/Fmr1/Srsf2/Hnrnpu/Ythdc1/Srsf9/Rbm25/Sfpq/Rbm8a/Thrap3/Strap/Srsf6/Khdrbs1/Magoh/Fxr1/Rbm17/Nsrp1/Hnrnpa1/Srsf1/Sap18/Ddx17/Cdk13/Celf1/Hnrnpl/Rbm5/Fxr2/Puf60/Celf2/Hnrnpm/Tra2b/Rnps1	31
GO:1903829	GO:1903829	positive regulation of protein localization	82/1569	491/28814	9.40863289064246e-20	8.00492556421596e-18	5.78734753188415e-18	Npm1/Ppia/Dynll1/Rack1/Tpr/Hsp90ab1/Cct3/Tomm7/Anp32b/Ier3ip1/Ran/Oaz1/Rock2/Cd2ap/Cct8/Cfl1/Pdcd5/Bsg/Mpc2/Cct2/Cdc42/Cct4/Park7/Cct6a/Cep290/Tcp1/Tomm70a/Hnrnpk/Ywhae/Tmed10/Ccdc88a/Arpc2/Rtn4/Pdcd10/Pcm1/Sar1a/Cct7/Arf1/Cct5/Cyld/Lamtor5/Epb41l2/Sh3glb1/Vps35/Unc13b/Kif5b/Tsg101/Nmd3/Cdk1/Rac1/Fbxw7/Larp7/Pak1/Kif3a/Parp1/Kif20b/Ubr5/Pgrmc1/Oaz2/Cep295/Hif1a/Gnl3/Snx27/Tardbp/Ppp3cb/Rab11a/Tri…	82
GO:0006413	GO:0006413	translational initiation	38/1569	121/28814	2.87289740502641e-19	2.40548155738322e-17	1.73909896381131e-17	Npm1/Dazl/Eif3c/Eif5b/Eif2s2/Tpr/Fmr1/Eif4g2/Paip2/Dnajc3/Eif2s3y/Eif4a1/Eif2s1/Bzw1/Eif3e/Tmed2/Eif5/Eif3a/Slbp/Eif3m/Denr/Eif4a2/Khdrbs1/Eif3g/Eif4e/Eif3h/Eif3i/Eif1ax/Ythdf2/Eif2b3/Eif3d/Eif1ad/Eif3k/Polr2g/Paip1/Eif1a/Eif4b/Eif4g1	38
GO:2001020	GO:2001020	regulation of response to DNA damage stimulus	56/1569	262/28814	7.43938342517306e-19	6.13167930746686e-17	4.43304048509901e-17	Tex15/Tpt1/Npm1/Ddx5/Actb/Hmgb1/Zcwpw1/Fmr1/Rif1/Dek/Kdm1a/Fus/Atr/Mif/Hnrnpk/Pcna/Rbbp8/Nsd2/Ppp4r2/Bclaf1/Atad5/Trip12/Morf4l1/Usp47/Nek1/Smchd1/Ube2n/Fxr1/Mrgbp/Senp2/Ep400/Hdgfl2/Ppp4r3b/Mbtd1/Ube2v2/Ddx39b/Parg/Pttg1ip/Mtch2/Yy1/Parp1/Cops3/Ubr5/Fignl1/Slf1/Thoc1/Fxr2/Trim28/Mdm2/Morf4l2/Sirt1/Kmt5b/Slf2/Setd2/Ppp4c/Ruvbl1	56
GO:0034655	GO:0034655	nucleobase-containing compound catabolic process	71/1569	399/28814	8.18050317259322e-19	6.6387929592968e-17	4.79967012053526e-17	Npm1/Dazl/Ddx5/Ssb/Hint1/Fmr1/Rock1/Taf15/Hnrnpu/Ybx1/Cirbp/Rock2/Tut4/Meioc/Pabpc1/Hnrnpab/Etf1/Fus/Qk/Eif3e/Lsm2/Gspt1/Zc3h14/Rbm8a/Dhx36/Thrap3/Lsm4/Tnrc6c/Alkbh5/Dctpp1/Vcp/Hnrnpr/Lsm5/Rbm46/Csde1/Xrn2/Magoh/Hnrnpa0/Fxr1/Trir/Syncrip/Lsm6/Slirp/Eif4enif1/Lsm3/Srsf1/Ythdf2/Gigyf2/Dut/Hnrnpd/Celf1/Mettl16/Polr2g/Lsm7/Fxr2/Paip1/Cnot6l/Tnrc6b/Casc3/Tardbp/Angel2/Exosc8/Grsf1/Rc3h2/Samd4b/Mtrex/M…	71
GO:0033108	GO:0033108	mitochondrial respiratory chain complex assembly	33/1569	93/28814	9.30134102408383e-19	7.43402634879427e-17	5.37460263640442e-17	Ndufab1/Ndufs5/Ndufb7/Ndufa1/Uqcc2/Ndufa5/Ndufa6/Ndufb4/Ndufc2/Ndufa2/Ndufs6/Ndufb6/Ndufa11/Cox17/Ndufb5/Ndufb9/Ndufa12/Ndufb8/Ndufc1/Ndufaf8/Cox14/Ndufb3/Ndufa3/Slc25a33/Ndufb10/Ndufs4/Ndufa10/Ndufa8/Ndufs7/Ndufs3/Ndufb2/Ndufs1/Tfam	33
GO:0043488	GO:0043488	regulation of mRNA stability	43/1569	160/28814	9.97164254321231e-19	7.8508081217082e-17	5.6759247343375e-17	Npm1/Dazl/Fmr1/Rock1/Taf15/Hnrnpu/Ybx1/Cirbp/Rock2/Tut4/Meioc/Pabpc1/Fus/Qk/Zc3h14/Dhx36/Thrap3/Tnrc6c/Alkbh5/Hnrnpr/Rbm46/Csde1/Hnrnpa0/Fxr1/Syncrip/Eif4enif1/Srsf1/Ythdf2/Gigyf2/Hnrnpd/Celf1/Mettl16/Polr2g/Fxr2/Paip1/Cnot6l/Tnrc6b/Tardbp/Angel2/Exosc8/Rc3h2/Samd4b/Hnrnpm	43
GO:0016032	GO:0016032	viral process	66/1569	355/28814	1.34405812146933e-18	1.04263332216923e-16	7.53796064099598e-17	Ppia/Ddx5/Ssb/Mphosph8/Hspa8/Hsp90ab1/Pcbp2/Fmr1/Ube2i/Top2a/Rock2/Fkbp6/Cul1/Cfl1/Vapa/Bsg/Etf1/Cdc42/Setdb1/Pkn2/Ythdc2/Banf1/Eif3a/Top2b/Gtf2h5/Snx3/Denr/Vcp/Csde1/Eif3g/Hdac1/Rad50/Ddx6/Ctsl/Vps4b/Smarca4/Nucks1/Tsg101/Pfn1/Adarb1/Eea1/Eps15/Larp7/Pikfyve/Eif3d/Ppib/Ilf3/Srpk1/Pcbp1/Rrp1b/Chmp4b/Dynlt1b/P4hb/Spcs1/Taf11/Nedd4/Tardbp/Psmc3/Rab5a/Trim28/Gtf2b/Ddb1/Snf8/Ep300/Kpna2/Rab1a	66
GO:0048193	GO:0048193	Golgi vesicle transport	57/1569	276/28814	1.97952336842326e-18	1.51333127078735e-16	1.09409811804691e-16	Rack1/Ier3ip1/Arf4/Vapa/Cul3/Chic2/Tmed2/Cnih4/Copb2/Golga4/Rab14/Vps29/Snx3/Tmed10/Vcp/Bet1/Sar1a/Vamp3/Arf1/Yipf4/Rab6a/Copb1/Macf1/Lman2/Trappc6b/Gbf1/Rab10/Arf5/Eps15/Spast/Arcn1/Trappc4/Rabep1/Kdelr2/Trip11/Ergic2/Gabarapl2/Nrbp1/Cux1/Vti1b/Mia2/Gcc2/Bcap29/Copa/Ap3s1/Lamp1/Ap1g1/Ergic3/Trappc8/Commd1/Dop1a/Copg2/Mia3/Rab1a/Bcap31/Sec22b/Arl1	57
GO:0031647	GO:0031647	regulation of protein stability	61/1569	313/28814	2.5249375728894e-18	1.90272081385594e-16	1.37561636489899e-16	Npm1/Serf2/Calr/Hspa8/Hsp90ab1/Hsp90aa1/Cct3/Tomm7/Cct8/Ptges3/Dad1/Kras/Ube2b/Cct2/Cct4/Park7/Cct6a/Sumo1/Cul3/Tcp1/Hspd1/Usp3/Usp9x/Rtn4/Pdcd10/Usp47/Naa15/Ddost/Cct7/Senp2/Cct5/Cenpe/Pin1/Vps35/Pfn1/Atp1b3/Fbxw7/Ppib/Ubr5/Usp8/Usp7/Gtpbp4/Phb2/Tardbp/Usp19/Lamp1/Ncor1/Mdm2/Ccnh/Mcm8/Commd1/Stx12/Ep300/Sirt1/Mapk8ip3/Zfp207/Trim44/Lamp2/Stub1/Bag4/Cdc73	61
GO:0044270	GO:0044270	cellular nitrogen compound catabolic process	73/1569	428/28814	3.0462541926213e-18	2.26323815015174e-16	1.63626077685204e-16	Npm1/Dazl/Ddx5/Ssb/Hint1/Fmr1/Rock1/Taf15/Hnrnpu/Ybx1/Cirbp/Rock2/Tut4/Meioc/Pabpc1/Hnrnpab/Etf1/Fus/Qk/Eif3e/Lsm2/Gspt1/Zc3h14/Rbm8a/Dhx36/Thrap3/Lsm4/Tnrc6c/Alkbh5/Dctpp1/Vcp/Hnrnpr/Lsm5/Rbm46/Csde1/Xrn2/Magoh/Hnrnpa0/Fxr1/Hmox2/Trir/Syncrip/Lsm6/Slirp/Eif4enif1/Lsm3/Srsf1/Ythdf2/Gigyf2/Dut/Aasdhppt/Hnrnpd/Celf1/Mettl16/Polr2g/Lsm7/Fxr2/Paip1/Cnot6l/Tnrc6b/Casc3/Tardbp/Angel2/Exosc8/Grsf1/Rc3h2…	73
GO:0046700	GO:0046700	heterocycle catabolic process	73/1569	429/28814	3.48100550584726e-18	2.55032000602004e-16	1.84381329644512e-16	Npm1/Dazl/Ddx5/Ssb/Hint1/Fmr1/Rock1/Taf15/Hnrnpu/Ybx1/Cirbp/Rock2/Tut4/Meioc/Pabpc1/Hnrnpab/Etf1/Fus/Qk/Eif3e/Lsm2/Gspt1/Zc3h14/Rbm8a/Dhx36/Thrap3/Lsm4/Tnrc6c/Alkbh5/Dctpp1/Vcp/Hnrnpr/Lsm5/Rbm46/Csde1/Xrn2/Magoh/Hnrnpa0/Fxr1/Hmox2/Trir/Syncrip/Lsm6/Slirp/Eif4enif1/Lsm3/Srsf1/Ythdf2/Gigyf2/Dut/Aasdhppt/Hnrnpd/Celf1/Mettl16/Polr2g/Lsm7/Fxr2/Paip1/Cnot6l/Tnrc6b/Casc3/Tardbp/Angel2/Exosc8/Grsf1/Rc3h2…	73
GO:0140014	GO:0140014	mitotic nuclear division	57/1569	281/28814	4.75625342764391e-18	3.4368817576468e-16	2.48477378058455e-16	Smc1b/Smc3/Smarca5/Tpr/Smc4/Mki67/Bub1/Ube2s/Hnrnpu/Ran/Stag1/Nipbl/Cdc42/Nudc/Cul3/Cdk11b/Banf1/Anapc5/Cdca8/Ranbp1/Kif23/Naa50/Ncapg2/Smc5/Tpx2/Kif2a/Cenpe/Vps4b/Ncapg/Rhoa/Akap8l/Cltc/Spast/Ik/Prc1/Kif20b/Baz1b/Smc2/Cdc20/Chmp4b/Slf1/Pds5a/Nsfl1c/Eml4/Phb2/Cenpk/Tex14/Rab11a/Ncapd3/Pds5b/Sgo2a/Apc/Anapc11/Cep85/Slf2/Zfp207/Becn1	57
GO:0043487	GO:0043487	regulation of RNA stability	44/1569	174/28814	5.03433802495776e-18	3.5886666326557e-16	2.59451019408563e-16	Npm1/Dazl/Fmr1/Rock1/Taf15/Hnrnpu/Ybx1/Cirbp/Rock2/Tut4/Meioc/Pabpc1/Fus/Qk/Zc3h14/Dhx36/Thrap3/Tnrc6c/Alkbh5/Hnrnpr/Rbm46/Csde1/Hnrnpa0/Fxr1/Syncrip/Eif4enif1/Srsf1/Ythdf2/Gigyf2/Hnrnpd/Celf1/Mettl16/Polr2g/Fxr2/Paip1/Cnot6l/Tnrc6b/Tardbp/Angel2/Exosc8/Rc3h2/Samd4b/Hnrnpm/Zc3h18	44
GO:0043414	GO:0043414	macromolecule methylation	62/1569	329/28814	7.50392212298968e-18	5.27775855983608e-16	3.81567857566198e-16	Tex15/Hells/Smarca5/Mphosph8/Fkbp6/Rif1/Etf1/Kcnq1ot1/Kdm1a/Arid4b/Ddx4/Setdb1/Gspt1/Iws1/Suz12/Snrpb/Zdbf2/Nsd1/Gnas/Snrpd3/Nsd2/Zc3h13/Ash1l/Jarid2/Kmt2a/Baz2a/Tdrkh/Ramac/Ezh2/Mael/Rab6a/Smarca4/Prdm9/Trmt112/Mov10l1/Rnf20/Auts2/Kmt2e/Larp7/Ctnnb1/Ilf3/Parp1/Emg1/Kmt2c/Setd3/Cbll1/Mettl16/Kdm3a/Prmt1/Trmt10a/Ctr9/Chtop/Bmi1/Nelfe/Hdac2/Trim28/Fbl/Phf20/Sirt1/Kmt5b/Setd2/Pcmt1	62
GO:0007127	GO:0007127	meiosis I	38/1569	132/28814	8.02170374099742e-18	5.56769568865282e-16	4.0252953813897e-16	Tex15/Syce3/Syce2/4930447C04Rik/Hormad1/Sycp1/Brca2/Zcwpw1/Slc25a31/Cks2/Top2a/Meioc/Sycp3/Tex12/Ube2b/Dmc1/Ddx4/Topbp1/Stag3/Top2b/Brdt/Tex11/Cenpe/Mael/Ankrd31/M1ap/Prdm9/Hspa2/Mov10l1/Mnd1/Psma8/Meiob/Ccne2/Mybl1/Psmc3ip/Hfm1/Sgo2a/Brip1	38
GO:0061982	GO:0061982	meiosis I cell cycle process	38/1569	136/28814	2.44735596810859e-17	1.67659775737309e-15	1.21213543027442e-15	Tex15/Syce3/Syce2/4930447C04Rik/Hormad1/Sycp1/Brca2/Zcwpw1/Slc25a31/Cks2/Top2a/Meioc/Sycp3/Tex12/Ube2b/Dmc1/Ddx4/Topbp1/Stag3/Top2b/Brdt/Tex11/Cenpe/Mael/Ankrd31/M1ap/Prdm9/Hspa2/Mov10l1/Mnd1/Psma8/Meiob/Ccne2/Mybl1/Psmc3ip/Hfm1/Sgo2a/Brip1	38
GO:0051168	GO:0051168	nuclear export	41/1569	159/28814	3.21010440430965e-17	2.15753027919751e-15	1.55983680748966e-15	Npm1/Calr/Sem1/Ssb/Tpr/Hnrnpa2b1/Anp32b/Srsf3/Ran/Ythdc1/Alyref/Fyttd1/Park7/Iws1/Ywhae/Nxf2/Eny2/Sarnp/Alkbh5/Rae1/Khdrbs1/Hspa9/Pabpn1/Nup88/Thoc2/Nup153/Nmd3/Akap8l/Thoc7/Ddx39b/Xpo1/Ltv1/Thoc1/Chtop/Thoc3/Sdad1/Mdm2/Ctdspl2/Ahcyl1/Setd2/Nxt1	41
GO:0071824	GO:0071824	protein-DNA complex subunit organization	45/1569	190/28814	3.2311827878029e-17	2.15753027919751e-15	1.55983680748966e-15	Npm1/H3f3b/Taf7l/Ptma/Nasp/H3f3a/Hells/Smarca5/Hmgb1/Anp32b/1700013H16Rik/Nap1l1/Sycp3/Supt16/Gtf2a2/Dmc1/Cenpw/Senp6/Gtf2h5/Set/Smarcc1/Brd2/Smarce1/Rnf4/Psmc6/Cenpe/Smarca4/Taf7/Cenpp/Taf10/Nap1l4/Taf1/Dnajc9/Asf1b/Pole3/Taf11/Smarcd1/Cenpk/Xlr/Dr1/Gtf2b/Setd2/Taf1b/Bdp1/Shprh	45
GO:0000070	GO:0000070	mitotic sister chromatid segregation	41/1569	161/28814	5.20611098047653e-17	3.43277942775171e-15	2.48180790556138e-15	Smc1b/Smc3/Smarca5/Tpr/Smc4/Bub1/Hnrnpu/Ran/Nipbl/Nudc/Cul3/Anapc5/Cdca8/Kif23/Naa50/Ncapg2/Smc5/Cenpe/Vps4b/Ncapg/Akap8l/Ik/Prc1/Baz1b/Smc2/Cdc20/Chmp4b/Slf1/Pds5a/Eml4/Cenpk/Tex14/Rab11a/Ncapd3/Pds5b/Sgo2a/Apc/Anapc11/Slf2/Zfp207/Becn1	41
GO:2000113	GO:2000113	negative regulation of cellular macromolecule biosynthetic process	48/1569	217/28814	5.46164732094615e-17	3.5568135330853e-15	2.57148125325379e-15	Calr/Ncl/Rack1/Tpr/Fmr1/Rock1/Dbi/Hnrnpu/Ybx1/Srp9/Paip2/Rock2/Tut4/Pabpc1/Eif2s1/Qk/Caprin2/Dhx36/Eprs/Tnrc6c/Hnrnpr/Caprin1/Csde1/Eif4e/Fxr1/Ddx6/Malsu1/Tmem59/Syncrip/Eif4enif1/Ythdf2/Gigyf2/Hnrnpd/Ilf3/Celf1/Mettl16/Polr2g/Itm2b/Fxr2/Paip1/Cnot6l/Tnrc6b/Tardbp/Exosc8/Rc3h2/Samd4b/Mrpl13/Oga	48
GO:0019439	GO:0019439	aromatic compound catabolic process	73/1569	451/28814	5.83012838171748e-17	3.75047892848289e-15	2.71149616520699e-15	Npm1/Dazl/Ddx5/Ssb/Hint1/Fmr1/Rock1/Taf15/Hnrnpu/Ybx1/Cirbp/Rock2/Tut4/Meioc/Pabpc1/Hnrnpab/Etf1/Fus/Qk/Eif3e/Lsm2/Gspt1/Zc3h14/Rbm8a/Dhx36/Thrap3/Lsm4/Tnrc6c/Alkbh5/Dctpp1/Vcp/Hnrnpr/Lsm5/Rbm46/Csde1/Xrn2/Magoh/Hnrnpa0/Fxr1/Hmox2/Trir/Syncrip/Lsm6/Slirp/Eif4enif1/Lsm3/Srsf1/Ythdf2/Gigyf2/Dut/Aasdhppt/Hnrnpd/Celf1/Mettl16/Polr2g/Lsm7/Fxr2/Paip1/Cnot6l/Tnrc6b/Casc3/Tardbp/Angel2/Exosc8/Grsf1/Rc3h2…	73
GO:0006605	GO:0006605	protein targeting	55/1569	280/28814	8.17464555176972e-17	5.19533196211871e-15	3.7560863454739e-15	Hspa8/Hsp90aa1/Tomm7/Sec62/Tomm20/Ywhaq/Srp9/Arl6ip1/Pdcd5/Hspa5/Dnajc19/Immp1l/Tomm70a/Naca/Ywhae/Hspd1/Sec61b/Spcs2/Hspa4/Srp19/Arpc2/Tomm22/Srp14/Sec61g/Dnajc15/Timm13/Pmpcb/Romo1/Sec63/Macf1/Zfand6/Pex13/Vps13a/Ywhaz/Fbxw7/Timm23/Pikfyve/Pak1/Ssr3/Timm17b/Zfyve16/Chmp4b/Vps37a/Spcs1/Bnip3l/Gcc2/Nedd4/Pex7/Nup54/Synj2bp/Lamp2/Atpif1/Bcap31/Bag4/Oga	55
GO:0018205	GO:0018205	peptidyl-lysine modification	67/1569	395/28814	1.00357898201072e-16	6.30223705965068e-15	4.55634918775045e-15	Actb/Sumo2/Ndufab1/Hint1/Brca2/Ube2i/Hat1/Rif1/Kdm1a/Arid4b/Setdb1/Park7/Sumo1/Senp6/Iws1/Nsd1/Eny2/Nsd2/Uba2/Morf4l1/Ash1l/Naa50/Jarid2/Kmt2a/Mrgbp/Baz2a/Smc5/Senp2/Ezh2/Ep400/Esco1/Smarca4/Prdm9/Taf7/Brd7/Mbtd1/Trmt112/Atf2/Zfp451/Taf10/Auts2/Taf1/Sae1/Kmt2e/Sgf29/Ctnnb1/Kmt2c/Setd3/Pole3/Kdm3a/Ctr9/Bmi1/Gnl3/Nelfe/Hdac2/Trim28/Dr1/Phf20/Morf4l2/Ep300/Sirt1/Topors/Kmt5b/App/Setd2/Jade3/Ruvbl1	67
GO:1904951	GO:1904951	positive regulation of establishment of protein localization	61/1569	337/28814	1.02775310611876e-16	6.37811486444288e-15	4.61120681544057e-15	Ppia/Dynll1/Rack1/Tpr/Hsp90ab1/Cct3/Tomm7/Anp32b/Ier3ip1/Ran/Oaz1/Cd2ap/Cct8/Pdcd5/Bsg/Mpc2/Cct2/Cdc42/Cct4/Cct6a/Cep290/Tcp1/Tomm70a/Ywhae/Tmed10/Arpc2/Pdcd10/Pcm1/Sar1a/Cct7/Arf1/Cct5/Sh3glb1/Vps35/Unc13b/Kif5b/Tsg101/Cdk1/Rac1/Fbxw7/Pak1/Kif3a/Kif20b/Ubr5/Oaz2/Cep295/Hif1a/Tardbp/Ppp3cb/Trim28/Tmem30a/Mdm2/Ergic3/Commd1/Ctdspl2/Sirt1/App/Hnrnpm/Rbp4/Bcap31/Oga	61
GO:1903313	GO:1903313	positive regulation of mRNA metabolic process	38/1569	143/28814	1.54870549381061e-16	9.49932730215228e-15	6.867760102908e-15	Ncl/Hspa8/Rock1/Hnrnpu/Ybx1/Cirbp/Rock2/Tut4/Pabpc1/Tra2a/Snrnp70/Qk/Nudt21/Dhx36/Thrap3/Tnrc6c/Hnrnpr/Csde1/Rbmxl2/Syncrip/Eif4enif1/Adarb1/Ythdf2/Gigyf2/Hnrnpd/Celf1/Mettl16/Polr2g/Paip1/Cnot6l/Tnrc6b/Tardbp/Exosc8/Rc3h2/Samd4b/Tra2b/Dazap1/Cdc73	38
GO:0016574	GO:0016574	histone ubiquitination	23/1569	50/28814	1.89028579883317e-16	1.1461215619362e-14	8.28615299355423e-15	Scml2/Ube2b/Kdm1a/Park7/Suz12/Huwe1/Pcgf5/Trip12/Ube2n/Trim37/Rnf20/Rybp/Pcgf6/Cul4b/Ubr5/Kdm2a/Ctr9/Bmi1/Ddb1/Kdm2b/Ube2e1/Cdc73/Rnf2	23
GO:0031497	GO:0031497	chromatin assembly	41/1569	168/28814	2.65061365176369e-16	1.58886216057425e-14	1.14870493544735e-14	Npm1/H3f3b/Nasp/H3f3a/Hells/Smarca5/Mphosph8/Tpr/Hmgb1/Anp32b/Hat1/Nap1l1/Rif1/Kcnq1ot1/Kdm1a/Setdb1/Zdbf2/Gnas/Set/Pphln1/Hdac1/Brd2/Smchd1/Ubn1/Baz2a/Ezh2/M1ap/Smarca4/Rbbp4/Cenpp/Nap1l4/Dnajc9/Asf1b/Cbx3/Atf7ip2/Pole3/Ctr9/Trim28/Sirt1/Ubn2/Shprh	41
GO:0034249	GO:0034249	negative regulation of cellular amide metabolic process	47/1569	219/28814	4.02951236746506e-16	2.38827839757058e-14	1.7266615384182e-14	Calr/Ncl/Rack1/Tpr/Fmr1/Rock1/Hnrnpu/Ybx1/Srp9/Paip2/Rock2/Tut4/Pabpc1/Eif2s1/Qk/Caprin2/Dhx36/Eprs/Tnrc6c/Rtn3/Hnrnpr/Rtn4/Caprin1/Csde1/Eif4e/Fxr1/Ddx6/Malsu1/Pin1/Syncrip/Eif4enif1/Ythdf2/Gigyf2/Hnrnpd/Ilf3/Celf1/Mettl16/Polr2g/Fxr2/Paip1/Cnot6l/Tnrc6b/Tardbp/Exosc8/Rc3h2/Samd4b/Mrpl13	47
GO:0017148	GO:0017148	negative regulation of translation	44/1569	196/28814	6.0853751450029e-16	3.56670598776559e-14	2.57863323395854e-14	Calr/Ncl/Rack1/Tpr/Fmr1/Rock1/Hnrnpu/Ybx1/Srp9/Paip2/Rock2/Tut4/Pabpc1/Eif2s1/Qk/Caprin2/Dhx36/Eprs/Tnrc6c/Hnrnpr/Caprin1/Csde1/Eif4e/Fxr1/Ddx6/Malsu1/Syncrip/Eif4enif1/Ythdf2/Gigyf2/Hnrnpd/Ilf3/Celf1/Mettl16/Polr2g/Fxr2/Paip1/Cnot6l/Tnrc6b/Tardbp/Exosc8/Rc3h2/Samd4b/Mrpl13	44
GO:0006405	GO:0006405	RNA export from nucleus	28/1569	81/28814	8.64456743495975e-16	5.01099925488051e-14	3.62281871797099e-14	Npm1/Sem1/Ssb/Tpr/Hnrnpa2b1/Srsf3/Ythdc1/Alyref/Fyttd1/Iws1/Nxf2/Eny2/Sarnp/Alkbh5/Rae1/Khdrbs1/Pabpn1/Nup88/Thoc2/Nup153/Akap8l/Thoc7/Ddx39b/Thoc1/Chtop/Thoc3/Setd2/Nxt1	28
GO:1901361	GO:1901361	organic cyclic compound catabolic process	73/1569	477/28814	1.24954693175396e-15	7.16452180978495e-14	5.17975804776271e-14	Npm1/Dazl/Ddx5/Ssb/Hint1/Fmr1/Rock1/Taf15/Hnrnpu/Ybx1/Cirbp/Rock2/Tut4/Meioc/Pabpc1/Hnrnpab/Etf1/Fus/Qk/Eif3e/Lsm2/Gspt1/Zc3h14/Rbm8a/Dhx36/Thrap3/Lsm4/Tnrc6c/Alkbh5/Dctpp1/Vcp/Hnrnpr/Lsm5/Rbm46/Csde1/Xrn2/Magoh/Hnrnpa0/Fxr1/Hmox2/Trir/Syncrip/Lsm6/Slirp/Eif4enif1/Lsm3/Srsf1/Ythdf2/Gigyf2/Dut/Aasdhppt/Hnrnpd/Celf1/Mettl16/Polr2g/Lsm7/Fxr2/Paip1/Cnot6l/Tnrc6b/Casc3/Tardbp/Angel2/Exosc8/Grsf1/Rc3h2…	73
GO:0032259	GO:0032259	methylation	63/1569	376/28814	1.51689445173032e-15	8.60389057298649e-14	6.22038324688053e-14	Tex15/Hells/Smarca5/Mphosph8/Fkbp6/Rif1/Etf1/Kcnq1ot1/Kdm1a/Arid4b/Ddx4/Setdb1/Gspt1/Iws1/Suz12/Snrpb/Zdbf2/Nsd1/Gnas/Snrpd3/Nsd2/Zc3h13/Ash1l/Jarid2/Kmt2a/Baz2a/Tdrkh/Ramac/Ezh2/Mael/Rab6a/Smarca4/Prdm9/Trmt112/Mov10l1/Rnf20/Auts2/Kmt2e/Larp7/Ctnnb1/Ilf3/Parp1/Emg1/Kmt2c/Setd3/Cbll1/Mettl16/Carnmt1/Kdm3a/Prmt1/Trmt10a/Ctr9/Chtop/Bmi1/Nelfe/Hdac2/Trim28/Fbl/Phf20/Sirt1/Kmt5b/Setd2/Pcmt1	63
GO:0045132	GO:0045132	meiotic chromosome segregation	31/1569	103/28814	2.12438907734234e-15	1.19214387052988e-13	8.61888200135645e-14	Tex15/Syce3/Syce2/4930447C04Rik/Hormad1/Sycp1/Smc4/Bub1/Brca2/Zcwpw1/Top2a/Meioc/Sycp3/Tex12/Ube2b/Dmc1/Stag3/Top2b/Tex11/Mael/Ankrd31/M1ap/Prdm9/Meiob/Smc2/Ccne2/Psmc3ip/Hfm1/Ncapd3/Sgo2a/Brip1	31
GO:0007062	GO:0007062	sister chromatid cohesion	23/1569	55/28814	2.50871428479224e-15	1.39299661602937e-13	1.00709937438252e-13	Smc1b/Smc3/Hormad1/Bub1/Esco2/Sycp3/Stag1/Nipbl/Sfpq/Wapl/Stag3/Naa50/Smc5/Esco1/Fbxw7/Ctnnb1/Cdc20/Slf1/Pds5a/Phb2/Pds5b/Sgo2a/Slf2	23
GO:2001252	GO:2001252	positive regulation of chromosome organization	31/1569	104/28814	2.87016067559605e-15	1.57709349622595e-13	1.14019650522856e-13	Mphosph8/Tpr/Smc4/Cct3/Hnrnpa2b1/Cct8/Cct2/Cct4/Sfpq/Atr/Setdb1/Cct6a/Tcp1/Dhx36/Pphln1/Rad50/Cct7/Smc5/Cct5/Ncapg/Hnrnpd/Yy1/Ctnnb1/Smc2/Atf7ip2/Slf1/Gnl3/Trim28/Sgo2a/Slf2/Ruvbl1	31
GO:0042176	GO:0042176	regulation of protein catabolic process	64/1569	393/28814	3.66826452870139e-15	1.99485519473194e-13	1.44222706321054e-13	Rack1/Sumo2/Hsp90ab1/Hsp90aa1/Fmr1/Rbx1/Oaz1/Ubxn1/Psmd1/Park7/Sumo1/Mycbp2/Huwe1/Ube2k/Snx3/Vcp/Smarcc1/Psmd2/Ube3a/Csnk2a1/Fbxl5/Csnk2a2/Tiparp/Pin1/Vps35/Eif3h/Ptk2/Nrd1/Psmd14/Ube2v2/Tmf1/Fbxw7/Pttg1ip/Rybp/Cul4b/Dtl/Odc1/Ndfip1/Xpo1/Cdc20/Usp8/Gabarapl2/Oaz2/Usp7/Nedd4/Ppp2ca/Usp19/Ubxn2a/Gclc/Apc/Mdm2/Ddb1/Snf8/Rdx/Faf1/Commd1/App/Cop1/Arih1/Atpif1/Stub1/Bcap31/Sec22b/Rad23b	64
GO:0031056	GO:0031056	regulation of histone modification	43/1569	197/28814	3.79497490152022e-15	2.04270332709379e-13	1.47681998584401e-13	Smarca5/Fmr1/Rif1/Kdm5a/Ube2b/Nipbl/Kdm1a/Park7/Iws1/Nsd1/Slk/Ppp4r2/Trip12/Ube2n/Jarid2/Kmt2a/Hpf1/Baz2a/Prdm9/Ppp4r3b/Taf7/Brd7/Akap8l/Rnf20/Zfp451/Parg/Auts2/Kmt2e/Sgf29/Ctnnb1/Ubr5/Kdm2a/Kdm3a/Ctr9/Chtop/Nelfe/Ncor1/Dr1/Phf20/Sirt1/BC004004/App/Ppp4c	43
GO:0070192	GO:0070192	chromosome organization involved in meiotic cell cycle	27/1569	79/28814	3.90563643950597e-15	2.08103355741353e-13	1.50453171933335e-13	Tex15/Syce3/Syce2/4930447C04Rik/Hormad1/Sycp1/Smc4/Bub1/Zcwpw1/Meioc/Sycp3/Tex12/Ube2b/Dmc1/Stag3/Rad50/Tex11/Mael/Ankrd31/Prdm9/Meiob/Smc2/Ccne2/Psmc3ip/Ncapd3/Sgo2a/Brip1	27
GO:0000724	GO:0000724	double-strand break repair via homologous recombination	38/1569	158/28814	5.42138496729349e-15	2.85978057024732e-13	2.06754502489519e-13	Tex15/Sem1/Actb/Brca2/Sfr1/Smc6/Swi5/Rif1/Nipbl/Kdm1a/Dmc1/Fus/Sfpq/Rnf138/Rbbp8/Ppp4r2/Nabp1/Morf4l1/Smchd1/Ube2n/Mrgbp/Smc5/Ep400/Hdgfl2/Nucks1/Mbtd1/Psmd14/Rev3l/Yy1/Meiob/Parp1/Mcm5/Fignl1/Mcm8/Morf4l2/Setd2/Ppp4c/Ruvbl1	38
GO:0032386	GO:0032386	regulation of intracellular transport	58/1569	337/28814	6.0101458534687e-15	3.13896231455915e-13	2.26938597468651e-13	Tpr/Hsp90ab1/Tomm7/Anp32b/Ran/Oaz1/Pdcd5/Cdc42/Park7/Sumo1/Cep290/Iws1/Ywhae/Erlec1/Snx3/Arpc2/Pdcd10/Pcm1/Khdrbs1/Sar1a/Ppp1r12a/Arf1/Thoc2/Sh3glb1/Vps35/Nup153/Kif5b/Cdk1/Akap8l/Fbxw7/Pak1/Pkig/Kif3a/Kif20b/Ubr5/Xpo1/Oaz2/Dync1h1/Usp7/Bnip3l/Gcc2/Nedd4/Tardbp/Ppp2ca/Lamp1/Trim28/Tmem30a/Mdm2/Ergic3/Rdx/Commd1/Nup54/Ctdspl2/Setd2/Ufm1/Atpif1/Bcap31/Bag4	58
GO:0006406	GO:0006406	mRNA export from nucleus	24/1569	63/28814	7.79735574864063e-15	4.03245603667444e-13	2.91535808847523e-13	Sem1/Tpr/Hnrnpa2b1/Srsf3/Ythdc1/Alyref/Fyttd1/Iws1/Nxf2/Eny2/Sarnp/Alkbh5/Rae1/Pabpn1/Nup88/Thoc2/Akap8l/Thoc7/Ddx39b/Thoc1/Chtop/Thoc3/Setd2/Nxt1	24
GO:0000725	GO:0000725	recombinational repair	38/1569	160/28814	8.40035024566666e-15	4.30212112096035e-13	3.11031874706697e-13	Tex15/Sem1/Actb/Brca2/Sfr1/Smc6/Swi5/Rif1/Nipbl/Kdm1a/Dmc1/Fus/Sfpq/Rnf138/Rbbp8/Ppp4r2/Nabp1/Morf4l1/Smchd1/Ube2n/Mrgbp/Smc5/Ep400/Hdgfl2/Nucks1/Mbtd1/Psmd14/Rev3l/Yy1/Meiob/Parp1/Mcm5/Fignl1/Mcm8/Morf4l2/Setd2/Ppp4c/Ruvbl1	38
GO:0006275	GO:0006275	regulation of DNA replication	35/1569	137/28814	8.93353092232418e-15	4.53118996300578e-13	3.27592940603042e-13	Npm1/Smc3/Smarca5/Cacybp/Brca2/Tipin/Esco2/Cdc42/Atr/Cst3/Rfc4/Wapl/Pcna/Atad5/Ccdc88a/Rad17/Senp2/Rbbp6/Ankrd17/Esco1/Nucks1/Cdk1/Gmnn/Rac1/Usp37/Lig3/Yy1/Atf1/Dbf4/Pole3/Gtpbp4/Pds5a/Faf1/Jade3/Ruvbl1	35
GO:0006888	GO:0006888	endoplasmic reticulum to Golgi vesicle-mediated transport	32/1569	117/28814	1.54756275511343e-14	7.77466050783178e-13	5.62087204188067e-13	Ier3ip1/Vapa/Cul3/Tmed2/Cnih4/Copb2/Tmed10/Vcp/Bet1/Sar1a/Arf1/Yipf4/Copb1/Lman2/Trappc6b/Spast/Arcn1/Trappc4/Kdelr2/Trip11/Ergic2/Nrbp1/Mia2/Bcap29/Copa/Ergic3/Trappc8/Copg2/Mia3/Rab1a/Bcap31/Sec22b	32
GO:0065004	GO:0065004	protein-DNA complex assembly	36/1569	149/28814	2.40987314895716e-14	1.19061001915376e-12	8.60779266529127e-13	Npm1/H3f3b/Taf7l/Nasp/H3f3a/Hells/Smarca5/Hmgb1/Anp32b/Nap1l1/Gtf2a2/Dmc1/Cenpw/Senp6/Gtf2h5/Set/Brd2/Rnf4/Psmc6/Cenpe/Smarca4/Taf7/Cenpp/Taf10/Nap1l4/Taf1/Dnajc9/Asf1b/Pole3/Taf11/Cenpk/Dr1/Gtf2b/Taf1b/Bdp1/Shprh	36
GO:0000381	GO:0000381	regulation of alternative mRNA splicing, via spliceosome	23/1569	60/28814	2.41507624738299e-14	1.19061001915376e-12	8.60779266529127e-13	Ddx5/Fmr1/Srsf2/Hnrnpu/Ythdc1/Rbm25/Rbm8a/Thrap3/Srsf6/Khdrbs1/Magoh/Fxr1/Nsrp1/Sap18/Ddx17/Celf1/Hnrnpl/Rbm5/Fxr2/Puf60/Celf2/Tra2b/Rnps1	23
GO:0042254	GO:0042254	ribosome biogenesis	53/1569	299/28814	2.57034243725082e-14	1.25542188486093e-12	9.0763651561011e-13	Npm1/Snu13/Ncl/Esf1/Ran/Nol8/Mrpl20/Nop10/Rsl1d1/Ddx10/Gtf2h5/Utp18/Ebna1bp2/Mphosph10/Nup88/Pak1ip1/Malsu1/Npm3/Gnl2/Lsm6/Nop58/Trmt112/Nmd3/Ythdf2/Ddx17/Cul4b/Brix1/Emg1/Frg1/Xpo1/Mettl16/Ltv1/Rrp1b/Ddx21/Wdr36/Wbp11/Nsa2/Pa2g4/Ddx27/Ddx18/Gtpbp4/Exosc8/Utp3/Sdad1/Fbl/Nom1/Eri1/Mtrex/Mdn1/Mrto4/Utp20/Rbis/Las1l	53
GO:0044772	GO:0044772	mitotic cell cycle phase transition	65/1569	420/28814	2.69395830586615e-14	1.30372752875632e-12	9.42560206871372e-13	Nasp/Cenpf/Tpr/Bub1/Ube2s/Anp32b/Cks2/Calm1/Cul3/Arpp19/Topbp1/Rbbp8/Anapc5/Nae1/Spdya/Usp26/Nabp1/Atad5/Usp47/Taok1/Eif4e/Rad17/Ccni/Smc5/Senp2/Ezh2/Ankrd17/Cenpe/Calm2/Vps4b/Calm3/Brd7/Cdk1/Hspa2/Gigyf2/Usp37/E2f5/Spast/Taf10/Cul4b/Kmt2e/Dtl/Larp7/Ik/Clspn/Appl1/Dbf4/Npat/Chmp4b/Ccne2/Phb2/Tex14/Ppp2ca/Rab11a/Apc/Anapc11/Mdm2/Ccnh/Ddb1/Rdx/Pole/App/Zfp207/Eif4g1/Cdc73	65
GO:0034502	GO:0034502	protein localization to chromosome	29/1569	98/28814	2.77112056659984e-14	1.32887827171038e-12	9.6074352275514e-13	Tex15/H3f3a/Cct3/Brca2/Esco2/Cct8/Cct2/Nipbl/Cct4/Atr/Cct6a/Tcp1/Wapl/Stag3/Vcp/Pphln1/Knl1/Jarid2/Cct7/Smc5/Ezh2/Cct5/Cdk1/Ik/Slf1/Gnl3/Mcm8/Slf2/Setd2	29
GO:0000956	GO:0000956	nuclear-transcribed mRNA catabolic process	32/1569	121/28814	4.35495270350261e-14	2.06958337936723e-12	1.49625354621052e-12	Ddx5/Ssb/Hnrnpu/Ybx1/Pabpc1/Hnrnpab/Etf1/Eif3e/Gspt1/Rbm8a/Dhx36/Thrap3/Lsm4/Tnrc6c/Csde1/Xrn2/Magoh/Syncrip/Eif4enif1/Lsm3/Hnrnpd/Polr2g/Lsm7/Paip1/Cnot6l/Tnrc6b/Casc3/Exosc8/Rc3h2/Samd4b/Mrto4/Rnps1	32
GO:0050821	GO:0050821	protein stabilization	41/1569	195/28814	6.30478652109731e-14	2.96944186596324e-12	2.14682721484357e-12	Npm1/Calr/Hsp90ab1/Hsp90aa1/Cct3/Cct8/Ptges3/Ube2b/Cct2/Cct4/Park7/Cct6a/Sumo1/Tcp1/Hspd1/Usp9x/Rtn4/Pdcd10/Naa15/Cct7/Cct5/Pin1/Pfn1/Atp1b3/Fbxw7/Ppib/Usp7/Gtpbp4/Phb2/Usp19/Lamp1/Ncor1/Ccnh/Mcm8/Stx12/Ep300/Mapk8ip3/Zfp207/Trim44/Lamp2/Bag4	41
GO:0002181	GO:0002181	cytoplasmic translation	29/1569	101/28814	6.6056012134919e-14	3.08358817709467e-12	2.22935195123252e-12	Eif2s2/Fmr1/Cnbp/Hnrnpu/Ybx1/Ckap5/Eif2s3y/Etf1/Eif4a1/Rwdd1/Eif5/Dhx36/Eif3a/Zc3h15/Slbp/Eif3m/Denr/Eif4a2/Csde1/Syncrip/Eif3i/Eef2/Ythdf2/Eif2b3/Hnrnpd/Eif3d/Pkm/Paip1/Eif4b	29
GO:0051098	GO:0051098	regulation of binding	62/1569	397/28814	7.01593658718714e-14	3.24640925415896e-12	2.34706724426399e-12	Rack1/Actb/Hsp90ab1/Hmgb1/Fmr1/Rock1/Stmn1/Ran/Ppp1r2/Hmgb2/Eif2s1/Cdc42/Kdm1a/1810037I17Rik/Atr/Calm1/Park7/Sumo1/Eif3e/Hnrnpk/Wapl/Caprin2/Nsd1/Hspa4/Cycs/Senp2/Cyld/Lamtor5/Pin1/Smarca4/Nucks1/Atp2a2/Krit1/Aplp2/Lrpap1/Nmd3/Mapre1/Mark3/Fbxw7/Taf10/Larp7/Eif3d/Ctnnb1/Parp1/Map1lc3b/Btaf1/Hnrnpl/Gtpbp4/Tmbim6/Nme1/Tex14/Ppp2ca/Hdac2/Trim28/Gtf2f1/Gtf2b/Ep300/Sirt1/Adnp/App/Eif4g1/Stub1	62
GO:0031331	GO:0031331	positive regulation of cellular catabolic process	68/1569	461/28814	7.39320485764058e-14	3.39123092383079e-12	2.45176944615394e-12	Rack1/Sumo2/Hsp90aa1/Hmgb1/Fmr1/Rock1/Hnrnpu/Rbx1/Ybx1/Rock2/Tut4/Pabpc1/Mtdh/Sumo1/Qk/Dhx36/Rb1cc1/Tnrc6c/Vcp/Hnrnpr/Csde1/Fbxl5/Pik3c2a/Tmem59/Sh3glb1/Vps35/Syncrip/Ptk2/Eif4enif1/Nrd1/Ube2v2/Ythdf2/Gigyf2/Fbxw7/Hnrnpd/Pttg1ip/Gnai3/Celf1/Pafah1b2/Cdc20/Mettl16/Polr2g/Sptlc2/Hif1a/Bnip3l/Paip1/Cnot6l/Scoc/Tnrc6b/Tardbp/Exosc8/Zbtb20/Gclc/Mdm2/Rdx/Faf1/Grsf1/Rc3h2/Samd4b/Sirt1/App/Cop1/Arih1/Atp…	68
GO:2000779	GO:2000779	regulation of double-strand break repair	30/1569	109/28814	8.50091956085173e-14	3.865719886508e-12	2.79481230208401e-12	Tex15/Actb/Zcwpw1/Rif1/Dek/Kdm1a/Fus/Rbbp8/Nsd2/Ppp4r2/Trip12/Morf4l1/Smchd1/Ube2n/Mrgbp/Ep400/Hdgfl2/Ppp4r3b/Mbtd1/Ube2v2/Parp1/Ubr5/Fignl1/Slf1/Morf4l2/Kmt5b/Slf2/Setd2/Ppp4c/Ruvbl1	30
GO:0097193	GO:0097193	intrinsic apoptotic signaling pathway	53/1569	308/28814	8.927593262633e-14	4.02504738977684e-12	2.91000183450467e-12	Tpt1/Ppia/Ddx5/Rack1/Hells/Selenok/Hint1/Bub1/Brca2/Dnaja1/Sod1/Kdm1a/Sfpq/Park7/Mif/Uri1/Hnrnpk/Stk25/Sod2/Bclaf1/Atad5/Ube2k/Pdcd10/Usp47/Vdac2/Hdac1/Cyld/Mael/Sh3glb1/Atf2/Fbxw7/Rnf7/Cyct/Pttg1ip/Mtch2/Ptpn2/Parp1/Dnajc10/Qrich1/Fignl1/Ndufs3/P4hb/Hif1a/Tmbim6/Hdac2/Mdm2/Ep300/Sirt1/Topors/Serinc3/Becn1/Bcap31/Ppp1r13b	53
GO:0006513	GO:0006513	protein monoubiquitination	26/1569	82/28814	9.62438987165248e-14	4.30242852313278e-12	3.11054099063309e-12	Rbx1/Cul1/Scml2/Ube2b/Ube2t/Cul3/Huwe1/Pcgf5/Trim37/Tsg101/Rnf20/Rybp/Pcgf6/Cul4b/Dtl/Rad18/Ctr9/Bmi1/Nedd4/Ddb1/Kdm2b/Topors/Trim41/Ube2e1/Cdc73/Rnf2	26
GO:0017038	GO:0017038	protein import	45/1569	233/28814	9.78698538402833e-14	4.33834856308819e-12	3.13651022081686e-12	Ddx5/Tpr/Hspa8/Hsp90ab1/Hsp90aa1/Tomm7/Tomm20/Ran/Cfl1/Pdcd5/Dnajc19/Sumo1/Tomm70a/Hspd1/Hspa4/Tomm22/Ranbp2/Nup88/Dnajc15/Romo1/Nup153/Eif4enif1/Pex13/Cdk1/Hikeshi/Atf2/Timm23/Pttg1ip/Pkig/Timm17b/Appl1/Ubr5/Phb2/Kpna4/Tardbp/Ppp2ca/Trim28/Pex7/Nup54/App/Kpna3/Hnrnpm/Kpna2/Ufm1/Nxt1	45
GO:1903320	GO:1903320	regulation of protein modification by small protein conjugation or removal	47/1569	254/28814	1.457327993962e-13	6.40617097345797e-12	4.6314906334424e-12	Npm1/Ppia/Hsp90ab1/Hsp90aa1/Ube2s/Ube2i/Rbx1/Dnaja1/Ubxn1/Hspa5/Kdm1a/Park7/Cul3/Mycbp2/Huwe1/Ube2l3/Dcun1d5/Vcp/Uba2/Trip12/Ube2n/Ube3a/Senp2/Pin1/Cops9/Ube2v2/Otud4/Rnf20/Fbxw7/Pttg1ip/Sae1/Ctnnb1/Ndfip1/Ubr5/Kdm2a/Cdc20/Hif1a/Gtpbp4/Ctr9/Gnl3/Ubxn2a/Gclc/Peli1/Commd1/Topors/Trim44/Stub1	47
GO:0033157	GO:0033157	regulation of intracellular protein transport	44/1569	227/28814	1.60949907531361e-13	7.01661786965233e-12	5.07282744659524e-12	Tpr/Hsp90ab1/Tomm7/Anp32b/Ran/Oaz1/Pdcd5/Cdc42/Park7/Sumo1/Cep290/Ywhae/Erlec1/Snx3/Arpc2/Pdcd10/Pcm1/Sar1a/Sh3glb1/Kif5b/Cdk1/Fbxw7/Pak1/Pkig/Kif3a/Kif20b/Ubr5/Xpo1/Oaz2/Bnip3l/Gcc2/Tardbp/Ppp2ca/Trim28/Tmem30a/Mdm2/Ergic3/Commd1/Nup54/Ctdspl2/Ufm1/Atpif1/Bcap31/Bag4	44
GO:0006120	GO:0006120	mitochondrial electron transport, NADH to ubiquinone	16/1569	29/28814	1.91705113947336e-13	8.28888914813275e-12	5.99264562408281e-12	Ndufa7/Ndufv2/Park7/Ndufc2/Ndufs6/Ndufb6/Ndufb9/Dnajc15/Ndufb8/Ndufv1/Ndufa10/Ndufa8/Ndufs7/Ndufs3/Dld/Ndufs1	16
GO:2001242	GO:2001242	regulation of intrinsic apoptotic signaling pathway	38/1569	177/28814	2.5961136768547e-13	1.11337395491126e-11	8.04939653508307e-12	Tpt1/Ppia/Rack1/Hells/Bub1/Dnaja1/Sod1/Kdm1a/Sfpq/Park7/Mif/Uri1/Hnrnpk/Sod2/Bclaf1/Atad5/Usp47/Vdac2/Hdac1/Cyld/Sh3glb1/Fbxw7/Cyct/Pttg1ip/Mtch2/Ptpn2/Parp1/Fignl1/Ndufs3/P4hb/Hif1a/Tmbim6/Hdac2/Mdm2/Sirt1/Serinc3/Becn1/Bcap31	38
GO:0006839	GO:0006839	mitochondrial transport	35/1569	153/28814	3.13701777399141e-13	1.33449748046812e-11	9.64806060710602e-12	Hsp90aa1/Tomm7/Slc25a31/Tomm20/Pdcd5/Dnajc19/Immp1l/Siva1/Tomm70a/Hspd1/Hspa4/Tomm22/Vdac2/Dnajc15/Timm13/Pmpcb/Romo1/Sh3glb1/Mtx2/Vps35/Spg7/Kif5b/Ywhaz/Atf2/Fbxw7/Timm23/Mtch2/Timm17b/Chchd10/Dynlt1b/Bnip3l/Gclc/Atpif1/Bcap31/Bag4	35
GO:0000245	GO:0000245	spliceosomal complex assembly	19/1569	44/28814	3.30462965878222e-13	1.3945537160061e-11	1.00822511610678e-11	Luc7l2/Psip1/Ythdc1/Srsf10/Luc7l3/Srsf6/Sf3b1/Scaf11/Srsf1/Luc7l/Snrpc/Ddx39b/Celf1/Srpk1/Rbm5/Sf3a3/Puf60/Setx/Celf2	19
GO:0009141	GO:0009141	nucleoside triphosphate metabolic process	30/1569	115/28814	3.97964159934201e-13	1.66608011401025e-11	1.20453145483844e-11	Atp5g2/Atp5j/Atp5e/Ran/Atp5l/Atp5b/Atp5h/Atp5j2/Nme2/Atp5g1/Atp5d/Ndufc2/Dctpp1/Vcp/Impdh2/Atp5a1/Atp5o/Atp5g3/Atp5c1/Rhoa/Dut/Gnai3/Parp1/Cmpk1/Pkm/Nme1/Adk/Atp5k/Ak2/Oga	30
GO:0015986	GO:0015986	proton motive force-driven ATP synthesis	14/1569	22/28814	4.03369510512321e-13	1.67541273067125e-11	1.2112786875973e-11	Atp5g2/Atp5j/Atp5e/Atp5l/Atp5b/Atp5h/Atp5j2/Atp5g1/Atp5d/Atp5a1/Atp5o/Atp5g3/Atp5c1/Atp5k	14
GO:0034504	GO:0034504	protein localization to nucleus	53/1569	320/28814	4.31683348173349e-13	1.77900754813626e-11	1.28617497568425e-11	Npm1/Calr/Ddx5/Tpr/Hspa8/Hsp90ab1/Hnrnpu/Ran/Cd2ap/Nol8/Cfl1/Park7/Sumo1/Ywhae/Ranbp2/Nup88/Lamtor5/Pin1/Nup153/Eif4enif1/Srsf1/Nmd3/Cdk1/Hikeshi/Atf2/Pttg1ip/Larp7/Pikfyve/Pkig/Parp1/Appl1/Ubr5/Xpo1/Chchd10/Maged1/Ctnna1/Phb2/Kpna4/Tardbp/Ppp2ca/Trim28/Mdm2/Nup54/Sirt1/Topors/Hdgf/App/Kpna3/Hnrnpm/Kpna2/Ufm1/Osbpl8/Nxt1	53
GO:0007129	GO:0007129	homologous chromosome pairing at meiosis	21/1569	56/28814	5.38106840166958e-13	2.18347198606208e-11	1.57859196916995e-11	Tex15/Syce3/Syce2/4930447C04Rik/Hormad1/Sycp1/Zcwpw1/Meioc/Sycp3/Tex12/Ube2b/Dmc1/Stag3/Tex11/Mael/Ankrd31/Prdm9/Meiob/Ccne2/Psmc3ip/Brip1	21
GO:0007140	GO:0007140	male meiotic nuclear division	21/1569	56/28814	5.38106840166958e-13	2.18347198606208e-11	1.57859196916995e-11	Tex15/Brca2/Slc25a31/Meioc/Dmc1/Ddx4/Sycp2/Stag3/Spdya/Brdt/Tdrkh/Tex11/Mael/M1ap/Hspa2/Mov10l1/Meiob/Fignl1/Mybl1/Tex14/Sgo2a	21
GO:0006282	GO:0006282	regulation of DNA repair	36/1569	164/28814	5.42375346583804e-13	2.18399233070959e-11	1.57896816446213e-11	Tex15/Actb/Hmgb1/Zcwpw1/Rif1/Dek/Kdm1a/Fus/Pcna/Rbbp8/Nsd2/Ppp4r2/Trip12/Morf4l1/Smchd1/Ube2n/Mrgbp/Ep400/Hdgfl2/Ppp4r3b/Mbtd1/Ube2v2/Parg/Yy1/Parp1/Ubr5/Fignl1/Slf1/Trim28/Morf4l2/Sirt1/Kmt5b/Slf2/Setd2/Ppp4c/Ruvbl1	36
GO:0009144	GO:0009144	purine nucleoside triphosphate metabolic process	27/1569	95/28814	6.29246949929377e-13	2.51460428854353e-11	1.81799178596023e-11	Atp5g2/Atp5j/Atp5e/Ran/Atp5l/Atp5b/Atp5h/Atp5j2/Nme2/Atp5g1/Atp5d/Ndufc2/Vcp/Impdh2/Atp5a1/Atp5o/Atp5g3/Atp5c1/Rhoa/Gnai3/Parp1/Pkm/Nme1/Adk/Atp5k/Ak2/Oga	27
GO:0070972	GO:0070972	protein localization to endoplasmic reticulum	24/1569	75/28814	6.81385846382582e-13	2.70248897719408e-11	1.95382740122208e-11	Sec62/Btf3/Srp9/Vapa/Hspa5/Naca/Sec61b/Spcs2/Srp19/Rtn4/Srp14/Sec61g/Sec63/Macf1/Gbf1/Rab10/Ssr3/Kdelr2/Gabarapl2/Chmp4b/Spcs1/Bcap29/Mia3/Bcap31	24
GO:0000018	GO:0000018	regulation of DNA recombination	32/1569	134/28814	9.23857187478237e-13	3.63682586861769e-11	2.62932803631866e-11	Tex15/Actb/Zcwpw1/Rif1/Alyref/Ube2b/Kdm1a/Fus/Rbbp8/Nsd2/Ppp4r2/Atad5/Morf4l1/Smchd1/Rad50/Mrgbp/Ep400/Hdgfl2/Prdm9/Mbtd1/Lig3/Ndfip1/Parp1/Rad18/Fignl1/Thoc1/Morf4l2/Kmt5b/Setd2/Ppp4c/Smarcad1/Ruvbl1	32
GO:0040029	GO:0040029	regulation of gene expression, epigenetic	36/1569	167/28814	9.62942423030815e-13	3.76260835665745e-11	2.72026541804339e-11	H3f3b/H3f3a/Hells/Smarca5/Mphosph8/Tpr/Hnrnpu/Hat1/Rif1/Ythdc1/Kcnq1ot1/Kdm1a/Arid4b/Setdb1/Suz12/Zdbf2/Gnas/Pcgf5/Pphln1/Hdac1/Smchd1/Jarid2/Baz2a/Ezh2/Smarca4/Cggbp1/Lrif1/Cbx3/Atf7ip2/Pole3/Ctr9/Smarcd1/Trim28/Phf20/Ep300/Sirt1	36
GO:0007346	GO:0007346	regulation of mitotic cell cycle	67/1569	479/28814	1.40182083390036e-12	5.43720948442969e-11	3.93095733840634e-11	Cenpf/Tpr/Mki67/Pafah1b1/Bub1/Hmgb1/Brca2/Anp32b/Tipin/Cks2/Hnrnpu/Meioc/Cdc42/Cul3/Cdk11b/Pkn2/Topbp1/Ywhae/Ythdc2/Anapc5/Nae1/Nabp1/Atad5/Usp47/Taok1/Eif4e/Rad17/Rad50/Senp2/Ezh2/Cyld/Ankrd17/Cenpe/Vps4b/Btg3/Brd7/Gbf1/Cdk1/Hspa2/Gigyf2/Atf2/Cul4b/Kmt2e/Dtl/Larp7/Ctnnb1/Ik/Clspn/Appl1/Kif20b/Dbf4/Phb2/Tex14/Angel2/Ppp2ca/Rab11a/Apc/Anapc11/Mdm2/Ccnh/Ddb1/Rdx/Sirt1/App/Zfp207/Eif4g1/Cdc73	67
GO:0031507	GO:0031507	heterochromatin assembly	25/1569	84/28814	1.42809283007301e-12	5.49867859754389e-11	3.97539786658049e-11	H3f3b/H3f3a/Hells/Smarca5/Mphosph8/Tpr/Hat1/Rif1/Kcnq1ot1/Kdm1a/Setdb1/Zdbf2/Gnas/Pphln1/Hdac1/Smchd1/Baz2a/Ezh2/Smarca4/Cbx3/Atf7ip2/Pole3/Ctr9/Trim28/Sirt1	25
GO:0050686	GO:0050686	negative regulation of mRNA processing	16/1569	32/28814	1.4528402892982e-12	5.55342936670147e-11	4.01498121138627e-11	Npm1/Hnrnpa2b1/Srsf7/Srsf9/Srsf10/Hnrnpk/Zc3h14/Srsf6/Acin1/Sap18/Rnf20/Hnrnpl/Ctr9/Nelfe/Tra2b/Rnps1	16
GO:0045143	GO:0045143	homologous chromosome segregation	23/1569	71/28814	1.53327443509847e-12	5.81872132744203e-11	4.20678021837315e-11	Tex15/Syce3/Syce2/4930447C04Rik/Hormad1/Sycp1/Brca2/Zcwpw1/Meioc/Sycp3/Tex12/Ube2b/Dmc1/Stag3/Tex11/Mael/Ankrd31/Prdm9/Meiob/Ccne2/Psmc3ip/Sgo2a/Brip1	23
GO:1902373	GO:1902373	negative regulation of mRNA catabolic process	22/1569	65/28814	1.7076262310551e-12	6.39237082706019e-11	4.62151349592199e-11	Dazl/Fmr1/Taf15/Hnrnpu/Ybx1/Cirbp/Meioc/Hnrnpab/Fus/Qk/Thrap3/Rbm46/Csde1/Hnrnpa0/Syncrip/Eif4enif1/Srsf1/Hnrnpd/Mettl16/Paip1/Tardbp/Angel2	22
GO:0006352	GO:0006352	DNA-templated transcription, initiation	28/1569	106/28814	1.71812423855945e-12	6.39237082706019e-11	4.62151349592199e-11	Taf7l/Smarca5/Sub1/Hmgb1/Eloc/Gtf2a2/Dhx36/Bclaf1/Gtf2h5/Gtf2e2/Psmc6/Med13/Taf4b/Taf7/Zfp451/Taf10/Taf1/Polr2g/Taf11/Gtf2f1/Dr1/Gtf2b/Ccnh/Setx/Med4/Taf1b/Bdp1/Tfam	28
GO:0032200	GO:0032200	telomere organization	33/1569	145/28814	1.72474968124687e-12	6.39237082706019e-11	4.62151349592199e-11	H3f3b/H3f3a/Hsp90ab1/Hsp90aa1/Cct3/Brca2/Hnrnpa2b1/Smc6/Hnrnpu/Hat1/Rif1/Cct8/Ptges3/Cct2/Cct4/Atr/Cct6a/Nop10/Tcp1/Pcna/Dhx36/Rad50/Cct7/Smc5/Ezh2/Cct5/Hnrnpd/Yy1/Ctnnb1/Parp1/Ccne2/Gnl3/Ruvbl1	33
GO:0051222	GO:0051222	positive regulation of protein transport	52/1569	321/28814	1.73290811046371e-12	6.39237082706019e-11	4.62151349592199e-11	Ppia/Dynll1/Rack1/Tpr/Hsp90ab1/Tomm7/Anp32b/Ier3ip1/Ran/Oaz1/Cd2ap/Pdcd5/Bsg/Mpc2/Cdc42/Cep290/Tomm70a/Ywhae/Tmed10/Arpc2/Pdcd10/Pcm1/Sar1a/Arf1/Sh3glb1/Vps35/Unc13b/Kif5b/Tsg101/Cdk1/Rac1/Fbxw7/Pak1/Kif3a/Kif20b/Ubr5/Oaz2/Hif1a/Tardbp/Ppp3cb/Trim28/Tmem30a/Mdm2/Ergic3/Commd1/Ctdspl2/Sirt1/App/Hnrnpm/Rbp4/Bcap31/Oga	52
GO:1902369	GO:1902369	negative regulation of RNA catabolic process	24/1569	78/28814	1.78418645881283e-12	6.53582192377615e-11	4.72522481014537e-11	Dazl/Fmr1/Taf15/Hnrnpu/Ybx1/Cirbp/Meioc/Hnrnpab/Fus/Qk/Dhx36/Thrap3/Rbm46/Csde1/Hnrnpa0/Syncrip/Slirp/Eif4enif1/Srsf1/Hnrnpd/Mettl16/Paip1/Tardbp/Angel2	24
GO:0050779	GO:0050779	RNA destabilization	27/1569	99/28814	1.86362557246757e-12	6.77974130673548e-11	4.90157201382942e-11	Rock1/Hnrnpu/Ybx1/Rock2/Tut4/Pabpc1/Qk/Dhx36/Tnrc6c/Hnrnpr/Csde1/Syncrip/Eif4enif1/Ythdf2/Gigyf2/Hnrnpd/Celf1/Mettl16/Polr2g/Paip1/Cnot6l/Tnrc6b/Tardbp/Exosc8/Rc3h2/Samd4b/Zc3h18	27
GO:0006479	GO:0006479	protein methylation	40/1569	207/28814	2.2418833460095e-12	8.04485350353747e-11	5.81621436633899e-11	Smarca5/Rif1/Etf1/Kdm1a/Arid4b/Setdb1/Gspt1/Iws1/Suz12/Snrpb/Nsd1/Snrpd3/Nsd2/Ash1l/Jarid2/Kmt2a/Baz2a/Ezh2/Rab6a/Prdm9/Trmt112/Rnf20/Auts2/Kmt2e/Ctnnb1/Ilf3/Kmt2c/Setd3/Kdm3a/Prmt1/Ctr9/Chtop/Nelfe/Hdac2/Fbl/Phf20/Sirt1/Kmt5b/Setd2/Pcmt1	40
GO:0008213	GO:0008213	protein alkylation	40/1569	207/28814	2.2418833460095e-12	8.04485350353747e-11	5.81621436633899e-11	Smarca5/Rif1/Etf1/Kdm1a/Arid4b/Setdb1/Gspt1/Iws1/Suz12/Snrpb/Nsd1/Snrpd3/Nsd2/Ash1l/Jarid2/Kmt2a/Baz2a/Ezh2/Rab6a/Prdm9/Trmt112/Rnf20/Auts2/Kmt2e/Ctnnb1/Ilf3/Kmt2c/Setd3/Kdm3a/Prmt1/Ctr9/Chtop/Nelfe/Hdac2/Fbl/Phf20/Sirt1/Kmt5b/Setd2/Pcmt1	40
GO:0070828	GO:0070828	heterochromatin organization	26/1569	93/28814	2.553629081271e-12	9.10161716466521e-11	6.58022628836758e-11	H3f3b/H3f3a/Hells/Smarca5/Mphosph8/Tpr/Hat1/Rif1/Kcnq1ot1/Kdm1a/Setdb1/Zdbf2/Gnas/Pphln1/Hdac1/Smchd1/Baz2a/Ezh2/Smarca4/Cbx3/Atf7ip2/Pole3/Ctr9/Hdac2/Trim28/Sirt1	26
GO:0061157	GO:0061157	mRNA destabilization	26/1569	95/28814	4.37307996211022e-12	1.5481877047068e-10	1.11929838945428e-10	Rock1/Hnrnpu/Ybx1/Rock2/Tut4/Pabpc1/Qk/Dhx36/Tnrc6c/Hnrnpr/Csde1/Syncrip/Eif4enif1/Ythdf2/Gigyf2/Hnrnpd/Celf1/Mettl16/Polr2g/Paip1/Cnot6l/Tnrc6b/Tardbp/Exosc8/Rc3h2/Samd4b	26
GO:0031330	GO:0031330	negative regulation of cellular catabolic process	44/1569	249/28814	4.45164462867337e-12	1.56549502775013e-10	1.13181112208306e-10	Dazl/Hsp90ab1/Fmr1/Dbi/Taf15/Hnrnpu/Ybx1/Cirbp/Eif4g2/Meioc/Hnrnpab/Ubxn1/Fus/Park7/Qk/Dhx36/Thrap3/Rbm46/Smarcc1/Csde1/Hnrnpa0/Csnk2a1/Csnk2a2/Herc1/Vps35/Syncrip/Slirp/Eif3h/Ptk2/Eif4enif1/Srsf1/Hnrnpd/Rybp/Gabarapl2/Mettl16/Chmp4b/Usp7/Paip1/Tardbp/Angel2/Usp19/Eif4g1/Becn1/Sec22b	44
GO:0048255	GO:0048255	mRNA stabilization	20/1569	56/28814	5.55648129615105e-12	1.94108866471502e-10	1.40335529703418e-10	Dazl/Taf15/Hnrnpu/Ybx1/Cirbp/Meioc/Fus/Qk/Thrap3/Rbm46/Csde1/Hnrnpa0/Syncrip/Eif4enif1/Srsf1/Hnrnpd/Mettl16/Paip1/Tardbp/Angel2	20
GO:0072655	GO:0072655	establishment of protein localization to mitochondrion	26/1569	96/28814	5.68893484882767e-12	1.97428495576092e-10	1.42735532945309e-10	Hsp90aa1/Tomm7/Tomm20/Dnaja1/Pdcd5/Dnajc19/Immp1l/Tomm70a/Hspd1/Hspa4/Tomm22/Rala/Dnajc15/Timm13/Pmpcb/Romo1/Sh3glb1/Ywhaz/Fbxw7/Timm23/Mtch2/Timm17b/Bnip3l/Atpif1/Bcap31/Bag4	26
GO:2001233	GO:2001233	regulation of apoptotic signaling pathway	59/1569	406/28814	6.2539368968602e-12	2.15617759025736e-10	1.55885884948913e-10	Tpt1/Ppia/Rack1/Hells/Bub1/Slc25a31/Dnaja1/Sod1/Higd1a/Hmgb2/Kdm1a/Sfpq/Gclm/Park7/Cdk11b/Mif/Uri1/Hnrnpk/Rnf34/Pdia3/Sod2/Rb1cc1/Bclaf1/Atad5/Usp47/Vdac2/Hdac1/Cyld/Sh3glb1/Pak2/Gnai2/Inca1/Fbxw7/Cyct/Pttg1ip/Mtch2/Ctnnb1/Gnai3/Ptpn2/Parp1/Pdcd7/Fignl1/Ndufs3/P4hb/Ppp1ca/Birc6/Maged1/Hif1a/Ctnna1/Tmbim6/Bmi1/Hdac2/Gclc/Mdm2/Faf1/Sirt1/Serinc3/Becn1/Bcap31	59
GO:0000209	GO:0000209	protein polyubiquitination	44/1569	254/28814	8.90632881630648e-12	3.05070678610498e-10	2.20557958314958e-10	Ppia/Ube2s/Rbx1/Cul1/Ube2b/Ube2d3/Ttc3/Ube2t/Cul3/Ube2d2a/Rnf34/Anapc5/Huwe1/Zfp91/Rnf216/Ube2k/Ube2l3/Trip12/Ube2n/Ube3a/Rnf4/Dzip3/Hectd1/Ube2j2/Ube2e3/Ube2v2/Rnf20/Anapc10/Dtl/Ctnnb1/Anapc13/Ubr5/Nedd4/Anapc11/Peli1/Ube2q1/Rc3h2/Topors/Ube2e1/Trim44/Arih1/Rnf187/Stub1/Shprh	44
GO:0009145	GO:0009145	purine nucleoside triphosphate biosynthetic process	22/1569	70/28814	9.28021530389602e-12	3.15826682116461e-10	2.283342617726e-10	Atp5g2/Atp5j/Atp5e/Atp5l/Atp5b/Atp5h/Atp5j2/Nme2/Atp5g1/Atp5d/Ndufc2/Vcp/Impdh2/Atp5a1/Atp5o/Atp5g3/Atp5c1/Parp1/Pkm/Nme1/Adk/Atp5k	22
GO:0045814	GO:0045814	negative regulation of gene expression, epigenetic	25/1569	91/28814	1.02596541315603e-11	3.469209970768e-10	2.50814621583287e-10	H3f3b/H3f3a/Hells/Smarca5/Mphosph8/Tpr/Hat1/Rif1/Kcnq1ot1/Kdm1a/Setdb1/Zdbf2/Gnas/Pphln1/Hdac1/Smchd1/Baz2a/Ezh2/Smarca4/Cbx3/Atf7ip2/Pole3/Ctr9/Trim28/Sirt1	25
GO:0045727	GO:0045727	positive regulation of translation	31/1569	138/28814	1.15863168940833e-11	3.89285488001842e-10	2.81443017816049e-10	Npm1/Dazl/Fmr1/Eif5a/Cnbp/Hnrnpu/Ybx1/Cirbp/Dnajc3/Eif2s3y/Uqcc2/Eif3e/Dhx36/Larp4/Usp16/Khdrbs1/Csde1/Larp1b/Fxr1/Syncrip/Eef2/Ythdf2/Ddx39b/Hnrnpd/Eif3d/Polr2g/Hnrnpl/Pkm/Fxr2/Paip1/Eif4g1	31
GO:0016072	GO:0016072	rRNA metabolic process	43/1569	248/28814	1.48417941609477e-11	4.95509267082273e-10	3.58239974984101e-10	Npm1/Snu13/Ncl/Esf1/Nol8/Nop10/Top1/Rsl1d1/Ddx10/Gtf2h5/Utp18/Ebna1bp2/Mphosph10/Npm3/Smarca4/Trir/Lsm6/Trmt112/Ythdf2/Ddx17/Brix1/Emg1/Frg1/Mettl16/Rrp1b/Ddx21/Wdr36/Wbp11/Nsa2/Pa2g4/Ddx27/Ddx18/Gtpbp4/Exosc8/Utp3/Fbl/Eri1/Mtrex/Mdn1/Mrto4/Utp20/Taf1b/Las1l	43
GO:0061014	GO:0061014	positive regulation of mRNA catabolic process	26/1569	100/28814	1.56969517409498e-11	5.20763650525221e-10	3.76498220175181e-10	Rock1/Hnrnpu/Ybx1/Rock2/Tut4/Pabpc1/Qk/Dhx36/Tnrc6c/Hnrnpr/Csde1/Syncrip/Eif4enif1/Ythdf2/Gigyf2/Hnrnpd/Celf1/Mettl16/Polr2g/Paip1/Cnot6l/Tnrc6b/Tardbp/Exosc8/Rc3h2/Samd4b	26
GO:0006367	GO:0006367	transcription initiation from RNA polymerase II promoter	22/1569	72/28814	1.74316740679121e-11	5.74700504426475e-10	4.15493125973983e-10	Taf7l/Sub1/Hmgb1/Eloc/Gtf2a2/Dhx36/Gtf2h5/Gtf2e2/Psmc6/Med13/Taf4b/Taf7/Zfp451/Taf10/Taf1/Polr2g/Taf11/Gtf2f1/Dr1/Gtf2b/Ccnh/Med4	22
GO:0006473	GO:0006473	protein acetylation	40/1569	221/28814	1.91776418083282e-11	6.28335779744915e-10	4.54269998506526e-10	Actb/Brca2/Esco2/Hat1/Park7/Iws1/Eny2/Morf4l1/Naa50/Taok1/Kmt2a/Naa15/Mrgbp/Naa35/Smc5/Ep400/Esco1/Smarca4/Taf7/Brd7/Mbtd1/Atf2/Zfp451/Taf10/Auts2/Taf1/Sgf29/Pole3/Cep295/Bmi1/Hdac2/Dr1/Phf20/Gtf2b/Morf4l2/Ep300/Sirt1/App/Jade3/Ruvbl1	40
GO:0002183	GO:0002183	cytoplasmic translational initiation	14/1569	27/28814	1.95488439791486e-11	6.36544148086473e-10	4.60204429736551e-10	Eif2s2/Eif2s3y/Eif4a1/Eif5/Eif3a/Slbp/Eif3m/Denr/Eif4a2/Eif3i/Ythdf2/Eif2b3/Eif3d/Eif4b	14
GO:0043489	GO:0043489	RNA stabilization	21/1569	66/28814	2.10534904785068e-11	6.81332283890328e-10	4.9258505652974e-10	Dazl/Taf15/Hnrnpu/Ybx1/Cirbp/Meioc/Fus/Qk/Dhx36/Thrap3/Rbm46/Csde1/Hnrnpa0/Syncrip/Eif4enif1/Srsf1/Hnrnpd/Mettl16/Paip1/Tardbp/Angel2	21
GO:0051983	GO:0051983	regulation of chromosome segregation	25/1569	94/28814	2.24075942409123e-11	7.20732070858612e-10	5.21070050929559e-10	Hormad1/Tpr/Smc4/Mki67/Bub1/Smc6/Hnrnpu/Cul3/Wapl/Anapc5/Ncapg2/Csnk2a1/Csnk2a2/Smc5/Cenpe/Ncapg/Ik/Rad18/Smc2/Tex14/Ncapd3/Apc/Anapc11/Zfp207/Becn1	25
GO:0019058	GO:0019058	viral life cycle	44/1569	261/28814	2.27227973989764e-11	7.26440947149094e-10	5.25197416117968e-10	Ppia/Ddx5/Mphosph8/Hspa8/Hsp90ab1/Pcbp2/Fmr1/Top2a/Rock2/Fkbp6/Vapa/Bsg/Cdc42/Setdb1/Pkn2/Ythdc2/Banf1/Top2b/Snx3/Vcp/Rad50/Ddx6/Ctsl/Vps4b/Nucks1/Tsg101/Adarb1/Eea1/Eps15/Pikfyve/Ppib/Ilf3/Srpk1/Pcbp1/Chmp4b/P4hb/Spcs1/Nedd4/Rab5a/Trim28/Ddb1/Snf8/Kpna2/Rab1a	44
GO:2001022	GO:2001022	positive regulation of response to DNA damage stimulus	32/1569	150/28814	2.32754850069508e-11	7.39627610913646e-10	5.34731022068374e-10	Ddx5/Actb/Hmgb1/Zcwpw1/Fmr1/Rif1/Fus/Atr/Pcna/Rbbp8/Bclaf1/Morf4l1/Smchd1/Ube2n/Fxr1/Mrgbp/Ep400/Hdgfl2/Mbtd1/Ube2v2/Parg/Mtch2/Yy1/Parp1/Slf1/Fxr2/Trim28/Morf4l2/Sirt1/Kmt5b/Slf2/Ruvbl1	32
GO:0009205	GO:0009205	purine ribonucleoside triphosphate metabolic process	24/1569	87/28814	2.40653311588435e-11	7.60147436304786e-10	5.49566308153104e-10	Atp5g2/Atp5j/Atp5e/Ran/Atp5l/Atp5b/Atp5h/Atp5j2/Nme2/Atp5g1/Atp5d/Ndufc2/Vcp/Impdh2/Atp5a1/Atp5o/Atp5g3/Atp5c1/Rhoa/Gnai3/Parp1/Pkm/Nme1/Atp5k	24
GO:0070585	GO:0070585	protein localization to mitochondrion	26/1569	102/28814	2.5528175322155e-11	8.01554314430759e-10	5.79502375890774e-10	Hsp90aa1/Tomm7/Tomm20/Dnaja1/Pdcd5/Dnajc19/Immp1l/Tomm70a/Hspd1/Hspa4/Tomm22/Rala/Dnajc15/Timm13/Pmpcb/Romo1/Sh3glb1/Ywhaz/Fbxw7/Timm23/Mtch2/Timm17b/Bnip3l/Atpif1/Bcap31/Bag4	26
GO:0006364	GO:0006364	rRNA processing	39/1569	214/28814	2.74869264093302e-11	8.57949921948028e-10	6.20274894929949e-10	Npm1/Snu13/Ncl/Esf1/Nol8/Nop10/Rsl1d1/Ddx10/Gtf2h5/Utp18/Ebna1bp2/Mphosph10/Npm3/Lsm6/Trmt112/Ythdf2/Ddx17/Brix1/Emg1/Frg1/Mettl16/Rrp1b/Ddx21/Wdr36/Wbp11/Nsa2/Pa2g4/Ddx27/Ddx18/Gtpbp4/Exosc8/Utp3/Fbl/Eri1/Mtrex/Mdn1/Mrto4/Utp20/Las1l	39
GO:0032388	GO:0032388	positive regulation of intracellular transport	36/1569	187/28814	3.11791016832913e-11	9.67469184584481e-10	6.99454398752722e-10	Tpr/Hsp90ab1/Tomm7/Anp32b/Ran/Oaz1/Pdcd5/Cdc42/Cep290/Ywhae/Arpc2/Pdcd10/Pcm1/Khdrbs1/Sar1a/Arf1/Sh3glb1/Kif5b/Cdk1/Fbxw7/Pak1/Kif3a/Kif20b/Ubr5/Oaz2/Dync1h1/Nedd4/Tardbp/Trim28/Tmem30a/Mdm2/Ergic3/Rdx/Commd1/Ctdspl2/Bcap31	36
GO:0009895	GO:0009895	negative regulation of catabolic process	49/1569	315/28814	3.36223229953612e-11	1.03717984678673e-09	7.49853346951022e-10	Dazl/Hsp90ab1/Fmr1/Dbi/Taf15/Hnrnpu/Ybx1/Cirbp/Eif4g2/Meioc/Hnrnpab/Ubxn1/Fus/Park7/Qk/Mycbp2/Dhx36/Thrap3/Snx3/Rbm46/Smarcc1/Csde1/Hnrnpa0/Csnk2a1/Csnk2a2/Herc1/Pin1/Vps35/Syncrip/Slirp/Eif3h/Ptk2/Eif4enif1/Srsf1/Hnrnpd/Rybp/Mtch2/Gabarapl2/Mettl16/Chmp4b/Usp7/Paip1/Tardbp/Angel2/Usp19/Ncor1/Eif4g1/Becn1/Sec22b	49
GO:0009142	GO:0009142	nucleoside triphosphate biosynthetic process	23/1569	82/28814	4.30006447989730e-11	1.31876977508478e-09	9.53435349490082e-10	Atp5g2/Atp5j/Atp5e/Atp5l/Atp5b/Atp5h/Atp5j2/Nme2/Atp5g1/Atp5d/Ndufc2/Vcp/Impdh2/Atp5a1/Atp5o/Atp5g3/Atp5c1/Parp1/Cmpk1/Pkm/Nme1/Adk/Atp5k	23
GO:0090316	GO:0090316	positive regulation of intracellular protein transport	31/1569	145/28814	4.48616207593464e-11	1.36789045956967e-09	9.88948293344156e-10	Tpr/Hsp90ab1/Tomm7/Anp32b/Ran/Oaz1/Pdcd5/Cdc42/Cep290/Ywhae/Arpc2/Pdcd10/Pcm1/Sar1a/Sh3glb1/Kif5b/Cdk1/Fbxw7/Pak1/Kif3a/Kif20b/Ubr5/Oaz2/Tardbp/Trim28/Tmem30a/Mdm2/Ergic3/Commd1/Ctdspl2/Bcap31	31
GO:0009206	GO:0009206	purine ribonucleoside triphosphate biosynthetic process	21/1569	69/28814	5.44898637287744e-11	1.65191971936371e-09	1.19429386744918e-09	Atp5g2/Atp5j/Atp5e/Atp5l/Atp5b/Atp5h/Atp5j2/Nme2/Atp5g1/Atp5d/Ndufc2/Vcp/Impdh2/Atp5a1/Atp5o/Atp5g3/Atp5c1/Parp1/Pkm/Nme1/Atp5k	21
GO:0006626	GO:0006626	protein targeting to mitochondrion	22/1569	76/28814	5.7314526395854e-11	1.72762358136074e-09	1.24902573914093e-09	Hsp90aa1/Tomm7/Tomm20/Pdcd5/Dnajc19/Immp1l/Tomm70a/Hspd1/Hspa4/Tomm22/Dnajc15/Timm13/Pmpcb/Romo1/Ywhaz/Fbxw7/Timm23/Timm17b/Bnip3l/Atpif1/Bcap31/Bag4	22
GO:0009199	GO:0009199	ribonucleoside triphosphate metabolic process	24/1569	91/28814	6.79760594958671e-11	2.03735064682215e-09	1.47295014087037e-09	Atp5g2/Atp5j/Atp5e/Ran/Atp5l/Atp5b/Atp5h/Atp5j2/Nme2/Atp5g1/Atp5d/Ndufc2/Vcp/Impdh2/Atp5a1/Atp5o/Atp5g3/Atp5c1/Rhoa/Gnai3/Parp1/Pkm/Nme1/Atp5k	24
GO:0051304	GO:0051304	chromosome separation	25/1569	100/28814	9.66848572019021e-11	2.88142724146912e-09	2.08319499044003e-09	Tpr/Smc4/Bub1/Top2a/Sycp3/Cul3/Anapc5/Top2b/Ncapg2/Csnk2a1/Csnk2a2/Tex11/Cenpe/M1ap/Ncapg/Ik/Meiob/Smc2/Hfm1/Tex14/Ncapd3/Apc/Anapc11/Zfp207/Smarcad1	25
GO:1901987	GO:1901987	regulation of cell cycle phase transition	56/1569	401/28814	1.03037388563092e-10	3.05349564421522e-09	2.20759585312881e-09	Npm1/Cenpf/Hormad1/Tpr/Bub1/Anp32b/Tipin/Cirbp/Atr/Cul3/Topbp1/Anapc5/Nae1/Nabp1/Atad5/Usp47/Nek1/Taok1/Rad17/Cdc5l/Senp2/Ezh2/Ankrd17/Cenpe/Vps4b/Brd7/Cdk1/Hspa2/Gigyf2/Atf2/Ddx39b/Cul4b/Kmt2e/Dtl/Larp7/Ik/Clspn/Appl1/Dbf4/Thoc1/Topaz1/Mlf1/Phb2/Tex14/Ppp2ca/Rab11a/Apc/Anapc11/Mdm2/Ccnh/Ddb1/Rdx/App/Zfp207/Eif4g1/Cdc73	56
GO:0043543	GO:0043543	protein acylation	43/1569	263/28814	1.05527595347479e-10	3.10982159473716e-09	2.24831801201951e-09	Selenok/Actb/Brca2/Esco2/Hat1/Park7/Iws1/Eny2/Morf4l1/Naa50/Taok1/Kmt2a/Naa15/Mrgbp/Naa35/Smc5/Ep400/Esco1/Smarca4/Taf7/Brd7/Mbtd1/Atf2/Zfp451/Taf10/Nmt2/Auts2/Taf1/Sgf29/Pole3/Dld/Cep295/Bmi1/Hdac2/Dr1/Phf20/Gtf2b/Morf4l2/Ep300/Sirt1/App/Jade3/Ruvbl1	43
GO:0098760	GO:0098760	response to interleukin-7	11/1569	17/28814	1.10144200621806e-10	3.21000363690622e-09	2.32074695465428e-09	Hmgb1/Ybx1/Atp5b/Hnrnph1/Hspd1/Pdia3/Stip1/P4hb/Jak1/Hdgf/Rad23b	11
GO:0098761	GO:0098761	cellular response to interleukin-7	11/1569	17/28814	1.10144200621806e-10	3.21000363690622e-09	2.32074695465428e-09	Hmgb1/Ybx1/Atp5b/Hnrnph1/Hspd1/Pdia3/Stip1/P4hb/Jak1/Hdgf/Rad23b	11
GO:0010390	GO:0010390	histone monoubiquitination	14/1569	30/28814	1.2142194805412e-10	3.51923503288727e-09	2.54431300057881e-09	Scml2/Pcgf5/Trim37/Rnf20/Rybp/Pcgf6/Cul4b/Ctr9/Bmi1/Ddb1/Kdm2b/Ube2e1/Cdc73/Rnf2	14
GO:0140694	GO:0140694	non-membrane-bounded organelle assembly	54/1569	381/28814	1.26938310210174e-10	3.65901413310746e-09	2.64536955934115e-09	Npm1/Smc3/Tpr/Actg1/Ubap2l/Hnrnpu/Cirbp/Mrpl20/Stag1/Eif2s1/Ccp110/Cenpw/Senp6/Prrc2c/Lsm4/Kif23/Arpc2/Csde1/Ddx6/Trim37/Rnf4/Tpx2/Kif2a/Cenpe/Vps4b/Prkar1a/Eif4enif1/Lsm3/Cfl2/Rhoa/Ythdf2/Mapre1/Cltc/Prc1/Alms1/Brix1/Cdc20/Chmp4b/Dync1h1/G3bp1/Cep295/Mef2a/Atxn2/Cnot6l/Cenpk/Rab11a/Ncor1/Hdac2/Haus6/Plk4/G3bp2/Mdn1/Mrto4/Zfp207	54
GO:0009201	GO:0009201	ribonucleoside triphosphate biosynthetic process	21/1569	72/28814	1.3333570788405e-10	3.82253184287153e-09	2.76358849922146e-09	Atp5g2/Atp5j/Atp5e/Atp5l/Atp5b/Atp5h/Atp5j2/Nme2/Atp5g1/Atp5d/Ndufc2/Vcp/Impdh2/Atp5a1/Atp5o/Atp5g3/Atp5c1/Parp1/Pkm/Nme1/Atp5k	21
GO:0030705	GO:0030705	cytoskeleton-dependent intracellular transport	36/1569	198/28814	1.68608567189404e-10	4.80762265904923e-09	3.47578286729566e-09	Dynll1/Hspa8/Pafah1b1/Fmr1/Hnrnpu/Sod1/Hspb11/Cdc42/Sfpq/Hook1/Ift74/Ccdc88a/Pcm1/Ift81/Tanc2/Kif1b/Spg7/Kif5b/Fnbp1l/Actr10/Spast/Rpgr/Pura/Kif3a/Ift88/Ssna1/Ift20/Dync1h1/Hif1a/Hsbp1/Ap3s1/Lamp1/Mapk8ip3/App/Copg2/Rab1a	36
GO:2000767	GO:2000767	positive regulation of cytoplasmic translation	10/1569	14/28814	1.82485663352998e-10	5.1753326569197e-09	3.74162738159542e-09	Cnbp/Hnrnpu/Ybx1/Dhx36/Csde1/Syncrip/Eef2/Hnrnpd/Pkm/Paip1	10
GO:0031396	GO:0031396	regulation of protein ubiquitination	38/1569	220/28814	2.50439522439963e-10	7.06453733085992e-09	5.10747193808042e-09	Npm1/Ppia/Hsp90ab1/Hsp90aa1/Ube2s/Rbx1/Dnaja1/Ubxn1/Hspa5/Kdm1a/Park7/Cul3/Mycbp2/Huwe1/Ube2l3/Dcun1d5/Trip12/Ube2n/Ube3a/Senp2/Pin1/Ube2v2/Rnf20/Fbxw7/Pttg1ip/Ndfip1/Ubr5/Kdm2a/Cdc20/Gtpbp4/Ctr9/Ubxn2a/Gclc/Peli1/Commd1/Topors/Trim44/Stub1	38
GO:0000910	GO:0000910	cytokinesis	34/1569	182/28814	2.54018840138687e-10	7.08967926842102e-09	5.1256488879001e-09	Brca2/Rock1/Stmn1/Rock2/Cfl1/Cdc42/Ccp110/Calm1/Cul3/Pkn2/Prpf40a/Son/Kif23/Arf1/Calm2/Sh3glb1/Pin1/Vps4b/Calm3/Rhoa/Spast/Prc1/Kif20b/Usp8/Chmp4b/Birc6/Tex14/Rab11a/Cspp1/Apc/Plk4/Dctn3/Setd2/Becn1	34
GO:0071897	GO:0071897	DNA biosynthetic process	34/1569	182/28814	2.54018840138687e-10	7.08967926842102e-09	5.1256488879001e-09	Npm1/Sycp1/Hsp90ab1/Hsp90aa1/Cct3/Hnrnpa2b1/Hnrnpu/Cct8/Sycp3/Tex12/Ptges3/Cct2/Cct4/Atr/Cct6a/Nop10/Tcp1/Rfc4/Pcna/Dnajc2/Vcp/Rad50/Cct7/Cct5/Lig1/Lig3/Ddx39b/Hnrnpd/Rev3l/Dtl/Ctnnb1/Sirt1/Pole/Jade3	34
GO:1903362	GO:1903362	regulation of cellular protein catabolic process	41/1569	250/28814	2.58914166854385e-10	7.18827489556252e-09	5.19693089481128e-09	Rack1/Sumo2/Hsp90ab1/Hsp90aa1/Fmr1/Rbx1/Ubxn1/Park7/Sumo1/Ube2k/Vcp/Smarcc1/Ube3a/Csnk2a1/Fbxl5/Csnk2a2/Vps35/Eif3h/Ptk2/Psmd14/Ube2v2/Tmf1/Fbxw7/Pttg1ip/Rybp/Xpo1/Cdc20/Gabarapl2/Usp7/Usp19/Gclc/Mdm2/Rdx/Faf1/Commd1/Cop1/Arih1/Atpif1/Stub1/Bcap31/Rad23b	41
GO:1901989	GO:1901989	positive regulation of cell cycle phase transition	27/1569	121/28814	2.84775569068165e-10	7.86487500960507e-09	5.68609471884244e-09	Npm1/Anp32b/Cul3/Anapc5/Atad5/Ezh2/Ankrd17/Cenpe/Vps4b/Cdk1/Hspa2/Ddx39b/Cul4b/Kmt2e/Dtl/Larp7/Dbf4/Thoc1/Topaz1/Phb2/Rab11a/Anapc11/Mdm2/Rdx/App/Eif4g1/Cdc73	27
GO:1903322	GO:1903322	positive regulation of protein modification by small protein conjugation or removal	30/1569	147/28814	3.06443634819204e-10	8.41921965453803e-09	6.08687110169944e-09	Npm1/Ube2s/Rbx1/Hspa5/Kdm1a/Cul3/Mycbp2/Huwe1/Ube2l3/Dcun1d5/Vcp/Uba2/Ube2n/Ube3a/Senp2/Pin1/Ube2v2/Rnf20/Fbxw7/Pttg1ip/Sae1/Ndfip1/Kdm2a/Cdc20/Ctr9/Gnl3/Peli1/Commd1/Topors/Stub1	30
GO:0006376	GO:0006376	mRNA splice site selection	13/1569	27/28814	3.44864778029665e-10	9.42570831143255e-09	6.81453553750464e-09	Luc7l2/Psip1/Ythdc1/Srsf10/Luc7l3/Srsf6/Srsf1/Luc7l/Snrpc/Celf1/Puf60/Setx/Celf2	13
GO:0034250	GO:0034250	positive regulation of cellular amide metabolic process	32/1569	166/28814	3.69387799838214e-10	1.00439208461164e-08	7.26148670002088e-09	Npm1/Dazl/Fmr1/Eif5a/Cnbp/Hnrnpu/Ybx1/Cirbp/Rock2/Dnajc3/Eif2s3y/Uqcc2/Eif3e/Dhx36/Larp4/Usp16/Khdrbs1/Csde1/Larp1b/Fxr1/Syncrip/Eef2/Ythdf2/Ddx39b/Hnrnpd/Eif3d/Polr2g/Hnrnpl/Pkm/Fxr2/Paip1/Eif4g1	32
GO:0034470	GO:0034470	ncRNA processing	54/1569	393/28814	4.0579725106435e-10	1.0973191732423e-08	7.93332474862929e-09	Npm1/Snu13/Ddx5/Ncl/Ssb/Hnrnpa2b1/Esf1/Ints6/Tut4/Nol8/Rtraf/Nop10/Rsl1d1/Ddx10/Gtf2h5/Utp18/Tsn/Ebna1bp2/Mphosph10/Npm3/Lsm6/Trmt112/Ythdf2/Ddx17/Thumpd1/Larp7/Brix1/Emg1/Frg1/Mettl16/Rrp1b/Ddx21/Wdr36/Wbp11/Nsa2/Pa2g4/Trmt10a/Rpp21/Ddx27/Ddx18/Gtpbp4/Exosc8/Ncor1/Utp3/Fbl/Zcchc8/Grsf1/Eri1/Mtrex/Mdn1/Mrto4/Utp20/Ints8/Las1l	54
GO:0051656	GO:0051656	establishment of organelle localization	57/1569	427/28814	4.07724280484343e-10	1.0973191732423e-08	7.93332474862929e-09	Npm1/Cenpf/Pafah1b1/Brca2/Hnrnpu/Ran/Cep83/Meioc/Cfl1/Ube2b/Cdc42/Nudc/Cul3/Stk25/Cdca8/Tmed10/Pdcd10/Pcm1/Sar1a/Pdpk1/Nup88/Arf1/Cenpe/Vps4b/Tanc2/Cdc42bpa/Kif1b/Kif5b/Ptk2/Fnbp1l/Tsg101/Gbf1/Actr10/Nmd3/Ywhaz/Spast/Ctnnb1/Trip11/Xpo1/Ltv1/Chmp4b/Dync1h1/Dynlt1b/Hif1a/Nsfl1c/Eml4/Rab11a/Hsbp1/Ap3s1/Lamp1/Sdad1/Snf8/Copg2/Tacc1/Ap1s2/Rab1a/Becn1	57
GO:0000723	GO:0000723	telomere maintenance	29/1569	140/28814	4.16154143535643e-10	1.11432137418808e-08	8.05624612358875e-09	Hsp90ab1/Hsp90aa1/Cct3/Brca2/Hnrnpa2b1/Smc6/Hnrnpu/Rif1/Cct8/Ptges3/Cct2/Cct4/Atr/Cct6a/Nop10/Tcp1/Pcna/Dhx36/Rad50/Cct7/Smc5/Cct5/Hnrnpd/Yy1/Ctnnb1/Parp1/Ccne2/Gnl3/Ruvbl1	29
GO:0010970	GO:0010970	transport along microtubule	32/1569	167/28814	4.33378174257514e-10	1.14877882874793e-08	8.30536432337992e-09	Dynll1/Hspa8/Pafah1b1/Fmr1/Hnrnpu/Sod1/Hspb11/Cdc42/Sfpq/Ift74/Pcm1/Ift81/Kif1b/Spg7/Kif5b/Actr10/Spast/Rpgr/Pura/Kif3a/Ift88/Ssna1/Ift20/Dync1h1/Hif1a/Hsbp1/Ap3s1/Lamp1/Mapk8ip3/App/Copg2/Rab1a	32
GO:0016571	GO:0016571	histone methylation	32/1569	167/28814	4.33378174257514e-10	1.14877882874793e-08	8.30536432337992e-09	Smarca5/Rif1/Kdm1a/Arid4b/Setdb1/Iws1/Suz12/Nsd1/Nsd2/Ash1l/Jarid2/Kmt2a/Baz2a/Ezh2/Prdm9/Trmt112/Rnf20/Auts2/Kmt2e/Ctnnb1/Kmt2c/Kdm3a/Prmt1/Ctr9/Chtop/Nelfe/Hdac2/Fbl/Phf20/Sirt1/Kmt5b/Setd2	32
GO:0045732	GO:0045732	positive regulation of protein catabolic process	38/1569	225/28814	4.88763681311454e-10	1.28911420945896e-08	9.31995167048104e-09	Rack1/Sumo2/Hsp90aa1/Fmr1/Rbx1/Oaz1/Sumo1/Huwe1/Vcp/Csnk2a1/Fbxl5/Tiparp/Vps35/Ptk2/Nrd1/Ube2v2/Fbxw7/Pttg1ip/Cul4b/Dtl/Ndfip1/Cdc20/Oaz2/Nedd4/Gclc/Apc/Mdm2/Ddb1/Snf8/Rdx/Faf1/App/Cop1/Arih1/Atpif1/Stub1/Bcap31/Sec22b	38
GO:0016575	GO:0016575	histone deacetylation	24/1569	100/28814	5.65182854002724e-10	1.47837734553744e-08	1.06882736300965e-08	Smarca5/Kdm5a/Nipbl/Sfpq/Chd4/Sin3b/Morf4l1/Hdac1/Baz2a/Rbbp7/Rbbp4/Akap8l/Gatad2a/Sgf29/Mier1/Ncor1/Suds3/Hdac2/Dr1/Morf4l2/Sirt1/BC004004/Smarcad1/Chd3	24
GO:0031123	GO:0031123	RNA 3'-end processing	25/1569	108/28814	5.66127438480687e-10	1.47837734553744e-08	1.06882736300965e-08	Ssb/Ints6/Tut4/Ythdc1/Papola/Nudt21/Zc3h14/Dhx36/Slbp/Pabpn1/Wdr33/Rnf20/Larp7/Fip1l1/Ctr9/Nelfe/Exosc8/Fbl/Eri1/Ahcyl1/App/Cstf2/Ssu72/Ints8/Cdc73	25
GO:0006997	GO:0006997	nucleus organization	29/1569	142/28814	5.92322335775528e-10	1.53604060268038e-08	1.11051635889469e-08	H3f3b/Smarca5/Sycp1/Pafah1b1/1700013H16Rik/Sycp3/Hmgb2/Sumo1/Banf1/Rtn4/Serbp1/Baz2a/Vps4b/Nup153/Selenof/Akap8l/Tmf1/Spast/Emg1/Ift88/Chmp4b/Kdm3a/Nsfl1c/Tardbp/Xlr/Ubxn2a/Nup54/Sirt1/Agfg1	29
GO:0007292	GO:0007292	female gamete generation	32/1569	169/28814	5.94032763880186e-10	1.53604060268038e-08	1.11051635889469e-08	Stra8/Dazl/H3f3b/H3f3a/4930447C04Rik/Hormad1/Brca2/Top2a/Tut4/Meioc/Sycp3/Ythdc1/Dmc1/Sycp2/Ythdc2/Stag3/Cntrl/Magoh/Tdrkh/Mdk/Cenpe/Taf4b/M1ap/Prdm9/Ythdf2/Ctnnb1/Meiob/Alms1/Hfm1/Sgo2a/Mcm8/Sirt1	32
GO:0009152	GO:0009152	purine ribonucleotide biosynthetic process	30/1569	151/28814	6.07561513525291e-10	1.56335950431508e-08	1.13026719563652e-08	Atp5g2/Atp5j/Atp5e/Atp5l/Atp5b/Atp5h/Mpc2/Atp5j2/Nme2/Atp5g1/Atp5d/Ndufc2/Mpc1/Vcp/Impdh2/Atp5a1/Atp5o/Atp5g3/Adss/Atp5c1/Parp1/Dld/Gmps/Pkm/Pdk3/Nme1/Adk/Atp5k/Ak2/Hprt	30
GO:0033522	GO:0033522	histone H2A ubiquitination	13/1569	28/28814	6.11565757874001e-10	1.56602396737153e-08	1.13219353131196e-08	Scml2/Ube2b/Pcgf5/Trip12/Trim37/Rybp/Pcgf6/Cul4b/Ubr5/Bmi1/Ddb1/Kdm2b/Rnf2	13
GO:0044728	GO:0044728	DNA methylation or demethylation	23/1569	93/28814	6.79473281644262e-10	1.73150800032535e-08	1.2518340703774e-08	Tex15/Hells/Smarca5/Mphosph8/Fkbp6/Kcnq1ot1/Ddx4/Zdbf2/Gnas/Usp9x/Kmt2a/Baz2a/Tdrkh/Ezh2/Mael/Smarca4/Mov10l1/Otud4/Kmt2e/Parp1/Usp7/Bmi1/Trim28	23
GO:0070936	GO:0070936	protein K48-linked ubiquitination	20/1569	71/28814	7.26816987988743e-10	1.84324981328876e-08	1.33262041876681e-08	Ppia/Rbx1/Cul1/Ube2b/Ube2d3/Ttc3/Ube2t/Cul3/Rnf34/Rnf216/Ube2k/Ube3a/Rnf4/Ube2e3/Ubr5/Peli1/Topors/Ube2e1/Trim44/Rnf187	20
GO:0030261	GO:0030261	chromosome condensation	16/1569	45/28814	7.96064136041016e-10	2.00920493665854e-08	1.45260154362961e-08	H3f3b/H3f3a/Smarca5/Smc4/Top2a/Wapl/Banf1/Acin1/Ncapg2/Smc5/Ncapg/Cdk1/Akap8l/Baz1b/Smc2/Ncapd3	16
GO:0031058	GO:0031058	positive regulation of histone modification	26/1569	118/28814	8.10808035493283e-10	2.03667256534622e-08	1.47245990606123e-08	Smarca5/Fmr1/Rif1/Nipbl/Kdm1a/Slk/Ube2n/Jarid2/Kmt2a/Baz2a/Prdm9/Brd7/Akap8l/Rnf20/Auts2/Kmt2e/Ctnnb1/Kdm2a/Ctr9/Chtop/Nelfe/Ncor1/Phf20/Sirt1/BC004004/App	26
GO:0018394	GO:0018394	peptidyl-lysine acetylation	34/1569	190/28814	8.31965436010524e-10	2.07991359002631e-08	1.50372201280425e-08	Actb/Brca2/Hat1/Park7/Iws1/Eny2/Morf4l1/Naa50/Kmt2a/Mrgbp/Smc5/Ep400/Esco1/Smarca4/Taf7/Brd7/Mbtd1/Atf2/Zfp451/Taf10/Auts2/Taf1/Sgf29/Pole3/Bmi1/Hdac2/Dr1/Phf20/Morf4l2/Ep300/Sirt1/App/Jade3/Ruvbl1	34
GO:0006754	GO:0006754	ATP biosynthetic process	18/1569	58/28814	8.99072919866386e-10	2.23708002466754e-08	1.61734915028596e-08	Atp5g2/Atp5j/Atp5e/Atp5l/Atp5b/Atp5h/Atp5j2/Atp5g1/Atp5d/Ndufc2/Vcp/Atp5a1/Atp5o/Atp5g3/Atp5c1/Parp1/Pkm/Atp5k	18
GO:0048025	GO:0048025	negative regulation of mRNA splicing, via spliceosome	12/1569	24/28814	9.56331498403584e-10	2.3683796498023e-08	1.71227527487827e-08	Npm1/Hnrnpa2b1/Srsf7/Srsf9/Srsf10/Hnrnpk/Srsf6/Acin1/Sap18/Hnrnpl/Tra2b/Rnps1	12
GO:2000781	GO:2000781	positive regulation of double-strand break repair	19/1569	65/28814	9.6420045237314e-10	2.37670905900388e-08	1.71829721541952e-08	Actb/Zcwpw1/Rif1/Fus/Rbbp8/Morf4l1/Smchd1/Ube2n/Mrgbp/Ep400/Hdgfl2/Mbtd1/Ube2v2/Parp1/Slf1/Morf4l2/Kmt5b/Slf2/Ruvbl1	19
GO:0009260	GO:0009260	ribonucleotide biosynthetic process	31/1569	163/28814	9.80115022497029e-10	2.40470081101015e-08	1.73853450502166e-08	Atp5g2/Atp5j/Atp5e/Atp5l/Atp5b/Atp5h/Mpc2/Atp5j2/Nme2/Atp5g1/Atp5d/Ndufc2/Mpc1/Vcp/Impdh2/Atp5a1/Atp5o/Atp5g3/Adss/Atp5c1/Parp1/Cmpk1/Dld/Gmps/Pkm/Pdk3/Nme1/Adk/Atp5k/Ak2/Hprt	31
GO:0030518	GO:0030518	intracellular steroid hormone receptor signaling pathway	25/1569	111/28814	1.04772680532389e-09	2.54689350142098e-08	1.84133602507323e-08	Calr/Ddx5/Dnaja1/Ptges3/Park7/Rwdd1/Hdac1/Ube3a/Smarca4/Taf7/Rhoa/Strn3/Tmf1/Ddx17/Pak1/Parp1/Safb/Ubr5/Kdm3a/Nedd4/Phb2/Ncor1/Ep300/Sirt1/Ufm1	25
GO:0045739	GO:0045739	positive regulation of DNA repair	25/1569	111/28814	1.04772680532389e-09	2.54689350142098e-08	1.84133602507323e-08	Actb/Hmgb1/Zcwpw1/Rif1/Fus/Pcna/Rbbp8/Morf4l1/Smchd1/Ube2n/Mrgbp/Ep400/Hdgfl2/Mbtd1/Ube2v2/Parg/Yy1/Parp1/Slf1/Trim28/Morf4l2/Sirt1/Kmt5b/Slf2/Ruvbl1	25
GO:0033119	GO:0033119	negative regulation of RNA splicing	13/1569	29/28814	1.05306400153524e-09	2.54812504958643e-08	1.84222640152689e-08	Npm1/Hnrnpa2b1/Srsf7/Srsf9/Srsf10/Hnrnpk/Srsf6/Acin1/Sap18/Hnrnpl/Tmbim6/Tra2b/Rnps1	13
GO:0019079	GO:0019079	viral genome replication	27/1569	128/28814	1.0817277558257e-09	2.60553146665779e-08	1.88372970889522e-08	Ppia/Ddx5/Mphosph8/Hspa8/Pcbp2/Fmr1/Top2a/Rock2/Fkbp6/Vapa/Cdc42/Setdb1/Pkn2/Ythdc2/Banf1/Top2b/Vcp/Nucks1/Adarb1/Eea1/Ppib/Ilf3/Srpk1/Pcbp1/Rab5a/Trim28/Ddb1	27
GO:0007131	GO:0007131	reciprocal meiotic recombination	17/1569	53/28814	1.48339143171615e-09	3.540674118689e-08	2.55981288740539e-08	Syce3/4930447C04Rik/Sycp1/Top2a/Sycp3/Ube2b/Dmc1/Topbp1/Top2b/Tex11/Ankrd31/Prdm9/Mnd1/Meiob/Psmc3ip/Hfm1/Brip1	17
GO:0140527	GO:0140527	reciprocal homologous recombination	17/1569	53/28814	1.48339143171615e-09	3.540674118689e-08	2.55981288740539e-08	Syce3/4930447C04Rik/Sycp1/Top2a/Sycp3/Ube2b/Dmc1/Topbp1/Top2b/Tex11/Ankrd31/Prdm9/Mnd1/Meiob/Psmc3ip/Hfm1/Brip1	17
GO:1902850	GO:1902850	microtubule cytoskeleton organization involved in mitosis	29/1569	148/28814	1.63754461828396e-09	3.89101255020175e-08	2.81309822287472e-08	Smc3/Tpr/Pafah1b1/Stmn1/Hnrnpu/Ckap5/Stag1/Nudc/Kif23/Vcp/Rae1/Tpx2/Kif2a/Cenpe/Vps4b/Rhoa/Cltc/Spast/Prc1/Cdc20/Chmp4b/Dync1h1/Dynlt1b/Nsfl1c/Rab11a/Setd2/Zfp207/Tacc1/Spc25	29
GO:0016573	GO:0016573	histone acetylation	31/1569	167/28814	1.81842799753209e-09	4.30143842465552e-08	3.1098251758597e-08	Actb/Brca2/Hat1/Park7/Iws1/Eny2/Morf4l1/Naa50/Kmt2a/Mrgbp/Ep400/Smarca4/Taf7/Brd7/Mbtd1/Atf2/Zfp451/Taf10/Auts2/Taf1/Sgf29/Pole3/Bmi1/Dr1/Phf20/Morf4l2/Ep300/Sirt1/App/Jade3/Ruvbl1	31
GO:0006475	GO:0006475	internal protein amino acid acetylation	32/1569	177/28814	1.98783127759945e-09	4.66035999526094e-08	3.36931589180951e-08	Actb/Brca2/Hat1/Park7/Iws1/Eny2/Morf4l1/Naa50/Kmt2a/Mrgbp/Smc5/Ep400/Smarca4/Taf7/Brd7/Mbtd1/Atf2/Zfp451/Taf10/Auts2/Taf1/Sgf29/Pole3/Bmi1/Dr1/Phf20/Morf4l2/Ep300/Sirt1/App/Jade3/Ruvbl1	32
GO:0018393	GO:0018393	internal peptidyl-lysine acetylation	32/1569	177/28814	1.98783127759945e-09	4.66035999526094e-08	3.36931589180951e-08	Actb/Brca2/Hat1/Park7/Iws1/Eny2/Morf4l1/Naa50/Kmt2a/Mrgbp/Smc5/Ep400/Smarca4/Taf7/Brd7/Mbtd1/Atf2/Zfp451/Taf10/Auts2/Taf1/Sgf29/Pole3/Bmi1/Dr1/Phf20/Morf4l2/Ep300/Sirt1/App/Jade3/Ruvbl1	32
GO:0006304	GO:0006304	DNA modification	24/1569	106/28814	2.0082655577336e-09	4.6874339898428e-08	3.38888966728869e-08	Tex15/Hells/Smarca5/Mphosph8/Fkbp6/Kcnq1ot1/Ddx4/Zdbf2/Gnas/Usp9x/Kmt2a/Baz2a/Tdrkh/Ezh2/Mael/Smarca4/Mov10l1/Ascc3/Otud4/Kmt2e/Parp1/Usp7/Bmi1/Trim28	24
GO:0035825	GO:0035825	homologous recombination	17/1569	54/28814	2.05534650543056e-09	4.77619066790581e-08	3.45305837661716e-08	Syce3/4930447C04Rik/Sycp1/Top2a/Sycp3/Ube2b/Dmc1/Topbp1/Top2b/Tex11/Ankrd31/Prdm9/Mnd1/Meiob/Psmc3ip/Hfm1/Brip1	17
GO:1904816	GO:1904816	positive regulation of protein localization to chromosome, telomeric region	9/1569	13/28814	2.4115701014575e-09	5.5794001250826e-08	4.03375737653765e-08	Cct3/Cct8/Cct2/Cct4/Cct6a/Tcp1/Cct7/Cct5/Gnl3	9
GO:0006305	GO:0006305	DNA alkylation	20/1569	76/28814	2.70656147573934e-09	6.20743990631523e-08	4.48781337601997e-08	Tex15/Hells/Smarca5/Mphosph8/Fkbp6/Kcnq1ot1/Ddx4/Zdbf2/Gnas/Kmt2a/Baz2a/Tdrkh/Ezh2/Mael/Smarca4/Mov10l1/Kmt2e/Parp1/Bmi1/Trim28	20
GO:0006306	GO:0006306	DNA methylation	20/1569	76/28814	2.70656147573934e-09	6.20743990631523e-08	4.48781337601997e-08	Tex15/Hells/Smarca5/Mphosph8/Fkbp6/Kcnq1ot1/Ddx4/Zdbf2/Gnas/Kmt2a/Baz2a/Tdrkh/Ezh2/Mael/Smarca4/Mov10l1/Kmt2e/Parp1/Bmi1/Trim28	20
GO:0034728	GO:0034728	nucleosome organization	25/1569	116/28814	2.77725016695592e-09	6.34198901761579e-08	4.58508879238154e-08	Npm1/H3f3b/Ptma/Nasp/H3f3a/Smarca5/Anp32b/1700013H16Rik/Nap1l1/Sycp3/Supt16/Set/Smarcc1/Brd2/Smarce1/Smarca4/Cenpp/Nap1l4/Dnajc9/Asf1b/Pole3/Smarcd1/Xlr/Setd2/Shprh	25
GO:0006446	GO:0006446	regulation of translational initiation	18/1569	62/28814	2.99983059262549e-09	6.79907666051211e-08	4.91555095855034e-08	Npm1/Dazl/Eif5b/Tpr/Fmr1/Eif4g2/Paip2/Dnajc3/Eif2s1/Bzw1/Tmed2/Eif5/Khdrbs1/Ythdf2/Eif3k/Polr2g/Paip1/Eif4g1	18
GO:0031398	GO:0031398	positive regulation of protein ubiquitination	26/1569	125/28814	3.00319405099397e-09	6.79907666051211e-08	4.91555095855034e-08	Npm1/Ube2s/Rbx1/Hspa5/Kdm1a/Cul3/Mycbp2/Huwe1/Ube2l3/Dcun1d5/Ube2n/Ube3a/Senp2/Pin1/Ube2v2/Rnf20/Fbxw7/Pttg1ip/Ndfip1/Kdm2a/Cdc20/Ctr9/Peli1/Commd1/Topors/Stub1	26
GO:0042776	GO:0042776	proton motive force-driven mitochondrial ATP synthesis	10/1569	17/28814	3.04837605184612e-09	6.87187336473858e-08	4.96818103276585e-08	Atp5j/Atp5e/Atp5b/Atp5h/Atp5j2/Atp5d/Atp5a1/Atp5o/Atp5c1/Atp5k	10
GO:2000765	GO:2000765	regulation of cytoplasmic translation	12/1569	26/28814	3.08429284724359e-09	6.92325309328083e-08	5.00532720517964e-08	Fmr1/Cnbp/Hnrnpu/Ybx1/Dhx36/Csde1/Syncrip/Eef2/Ythdf2/Hnrnpd/Pkm/Paip1	12
GO:1904851	GO:1904851	positive regulation of establishment of protein localization to telomere	8/1569	10/28814	3.09856026431085e-09	6.92580737044057e-08	5.00717387939261e-08	Cct3/Cct8/Cct2/Cct4/Cct6a/Tcp1/Cct7/Cct5	8
GO:0070646	GO:0070646	protein modification by small protein removal	29/1569	153/28814	3.65282466031581e-09	8.13023210260165e-08	5.87794081471206e-08	Hint1/Ubxn1/Park7/Senp6/Usp34/Usp3/Usp9x/Eny2/Usp26/Usp16/Vcp/Usp47/Senp2/Cyld/Usp15/Cops2/Taf7/Psmd14/Uchl3/Usp37/Otud4/Cops8/Taf10/Sgf29/Cops3/Usp8/Usp7/Zranb1/Usp19	29
GO:0046390	GO:0046390	ribose phosphate biosynthetic process	31/1569	172/28814	3.81989867678206e-09	8.4464911424942e-08	6.10658765961716e-08	Atp5g2/Atp5j/Atp5e/Atp5l/Atp5b/Atp5h/Mpc2/Atp5j2/Nme2/Atp5g1/Atp5d/Ndufc2/Mpc1/Vcp/Impdh2/Atp5a1/Atp5o/Atp5g3/Adss/Atp5c1/Parp1/Cmpk1/Dld/Gmps/Pkm/Pdk3/Nme1/Adk/Atp5k/Ak2/Hprt	31
GO:0010569	GO:0010569	regulation of double-strand break repair via homologous recombination	19/1569	70/28814	3.82694101053292e-09	8.4464911424942e-08	6.10658765961716e-08	Tex15/Actb/Rif1/Kdm1a/Fus/Rbbp8/Ppp4r2/Morf4l1/Smchd1/Mrgbp/Ep400/Hdgfl2/Mbtd1/Parp1/Fignl1/Morf4l2/Setd2/Ppp4c/Ruvbl1	19
GO:0032465	GO:0032465	regulation of cytokinesis	23/1569	101/28814	3.84735561633225e-09	8.45616703173025e-08	6.11358306928585e-08	Brca2/Cdc42/Ccp110/Calm1/Cul3/Pkn2/Prpf40a/Kif23/Calm2/Sh3glb1/Pin1/Calm3/Rhoa/Spast/Prc1/Kif20b/Birc6/Tex14/Rab11a/Cspp1/Plk4/Setd2/Becn1	23
GO:0043401	GO:0043401	steroid hormone mediated signaling pathway	25/1569	118/28814	4.0336671546869e-09	8.8288772784122e-08	6.38304263001993e-08	Calr/Ddx5/Dnaja1/Ptges3/Park7/Rwdd1/Hdac1/Ube3a/Smarca4/Taf7/Rhoa/Strn3/Tmf1/Ddx17/Pak1/Parp1/Safb/Ubr5/Kdm3a/Nedd4/Phb2/Ncor1/Ep300/Sirt1/Ufm1	25
GO:0061077	GO:0061077	chaperone-mediated protein folding	18/1569	64/28814	5.26543153815891e-09	1.14773352742927e-07	8.29780707383633e-08	Hspa8/Cct3/Cct8/Pdcd5/Hspa5/Ptges3/Cct2/Cct4/Cct6a/Tcp1/Hspe1/Hspa9/Fkbp1a/Cct7/Cct5/Hspa2/St13/Chordc1	18
GO:0007051	GO:0007051	spindle organization	32/1569	185/28814	6.14527043322789e-09	1.33400417840647e-07	9.64449416486232e-08	Smc3/Tpr/Stmn1/Hnrnpu/Ckap5/Stag1/Nudc/Senp6/Ranbp1/Kif23/Vcp/Rae1/Rnf4/Tpx2/Kif2a/Cenpe/Vps4b/Rhoa/Mapre1/Cltc/Spast/Prc1/Cdc20/Chmp4b/Dync1h1/Rab11a/Ncor1/Haus6/Zfp207/Tacc1/Spc25/Chd3	32
GO:0035518	GO:0035518	histone H2A monoubiquitination	10/1569	18/28814	6.52232989962748e-09	1.41005287789078e-07	1.01943059647758e-07	Scml2/Pcgf5/Trim37/Rybp/Pcgf6/Cul4b/Bmi1/Ddb1/Kdm2b/Rnf2	10
GO:1901990	GO:1901990	regulation of mitotic cell cycle phase transition	44/1569	311/28814	6.81535020778044e-09	1.46738662636905e-07	1.06088136639263e-07	Cenpf/Tpr/Bub1/Anp32b/Cul3/Topbp1/Anapc5/Nae1/Nabp1/Atad5/Usp47/Taok1/Rad17/Senp2/Ezh2/Ankrd17/Cenpe/Vps4b/Brd7/Cdk1/Hspa2/Gigyf2/Cul4b/Kmt2e/Dtl/Larp7/Ik/Clspn/Appl1/Dbf4/Phb2/Tex14/Ppp2ca/Rab11a/Apc/Anapc11/Mdm2/Ccnh/Ddb1/Rdx/App/Zfp207/Eif4g1/Cdc73	44
GO:0007052	GO:0007052	mitotic spindle organization	25/1569	121/28814	6.94285163867021e-09	1.48876188593436e-07	1.07633510855379e-07	Smc3/Tpr/Stmn1/Hnrnpu/Ckap5/Stag1/Nudc/Kif23/Vcp/Rae1/Tpx2/Kif2a/Cenpe/Vps4b/Rhoa/Cltc/Spast/Prc1/Cdc20/Chmp4b/Dync1h1/Rab11a/Zfp207/Tacc1/Spc25	25
GO:0001824	GO:0001824	blastocyst development	29/1569	158/28814	7.84539896130840e-09	1.67548500084623e-07	1.21133093700491e-07	Nasp/Hormad1/Med21/Brca2/Dad1/Matr3/Setdb1/Cul3/Cdk11b/Pbrm1/Rbbp8/Ndufa2/Sf3b1/Rtn4/Rbm46/Ncapg2/Thoc2/Cops2/Smarca4/N4bp2l2/Asf1b/Emg1/Specc1/Bnip2/Ctr9/Psmc3/Sf3b6/Suds3/Tjp1	29
GO:0022411	GO:0022411	cellular component disassembly	54/1569	427/28814	8.05886248096082e-09	1.70988440534523e-07	1.23620078833939e-07	Mphosph8/Hspa8/Pafah1b1/Tomm7/Stmn1/Eif5a/Top2a/Cfl1/Etf1/Supt16/Gspt1/Huwe1/Rb1cc1/Acin1/Denr/Vcp/Arpc2/Smarcc1/Taok1/Smarce1/Hdgfl3/Sptan1/Tpx2/Vps4b/Smarca4/Atp2a2/Kif5b/Gbf1/Cfl2/Cdk1/Hspa2/Akap8l/Mtpn/Fbxw7/Spast/Capza2/Add3/Map1lc3b/Gabarapl2/Chmp4b/Hif1a/Bnip3l/Eml4/Smarcd1/Phb2/Cisd2/Apc/Rdx/Setx/Ufm1/Lamp2/Atpif1/Becn1/Oga	54
GO:1903050	GO:1903050	regulation of proteolysis involved in cellular protein catabolic process	35/1569	217/28814	8.07130269063436e-09	1.70988440534523e-07	1.23620078833939e-07	Rack1/Sumo2/Hsp90ab1/Fmr1/Rbx1/Ubxn1/Park7/Sumo1/Ube2k/Vcp/Smarcc1/Ube3a/Csnk2a1/Csnk2a2/Eif3h/Ptk2/Psmd14/Ube2v2/Tmf1/Fbxw7/Rybp/Xpo1/Cdc20/Gabarapl2/Usp7/Usp19/Gclc/Mdm2/Commd1/Cop1/Arih1/Atpif1/Stub1/Bcap31/Rad23b	35
GO:0019080	GO:0019080	viral gene expression	19/1569	73/28814	8.20621177950919e-09	1.73151068547644e-07	1.25183601166997e-07	Ssb/Pcbp2/Eif3a/Denr/Csde1/Eif3g/Hdac1/Smarca4/Nucks1/Pfn1/Larp7/Eif3d/Rrp1b/Spcs1/Taf11/Tardbp/Psmc3/Gtf2b/Ep300	19
GO:0006164	GO:0006164	purine nucleotide biosynthetic process	30/1569	168/28814	8.47460914098182e-09	1.77977107039724e-07	1.28672698190056e-07	Atp5g2/Atp5j/Atp5e/Atp5l/Atp5b/Atp5h/Mpc2/Atp5j2/Nme2/Atp5g1/Atp5d/Ndufc2/Mpc1/Vcp/Impdh2/Atp5a1/Atp5o/Atp5g3/Adss/Atp5c1/Parp1/Dld/Gmps/Pkm/Pdk3/Nme1/Adk/Atp5k/Ak2/Hprt	30
GO:0046822	GO:0046822	regulation of nucleocytoplasmic transport	26/1569	131/28814	8.50241345478871e-09	1.77977107039724e-07	1.28672698190056e-07	Tpr/Hsp90ab1/Anp32b/Ran/Park7/Sumo1/Iws1/Ywhae/Khdrbs1/Ppp1r12a/Thoc2/Nup153/Cdk1/Akap8l/Pkig/Ubr5/Xpo1/Nedd4/Tardbp/Ppp2ca/Trim28/Mdm2/Nup54/Ctdspl2/Setd2/Ufm1	26
GO:0070193	GO:0070193	synaptonemal complex organization	12/1569	28/28814	8.77403746117035e-09	1.82936947065904e-07	1.32258530151114e-07	Tex15/Syce3/Syce2/4930447C04Rik/Hormad1/Sycp1/Meioc/Sycp3/Tex12/Ube2b/Tex11/Hspa2	12
GO:0006476	GO:0006476	protein deacetylation	25/1569	123/28814	9.86536408689777e-09	2.04881084875534e-07	1.48123556099588e-07	Smarca5/Kdm5a/Nipbl/Sfpq/Chd4/Sin3b/Morf4l1/Hdac1/Baz2a/Rbbp7/Rbbp4/Akap8l/Gatad2a/Sgf29/Mier1/Ncor1/Suds3/Hdac2/Dr1/Morf4l2/Ep300/Sirt1/BC004004/Smarcad1/Chd3	25
GO:0006354	GO:0006354	DNA-templated transcription, elongation	19/1569	74/28814	1.04801738248558e-08	2.15948894242634e-07	1.56125286872749e-07	Hnrnpu/Eloc/Alyref/Supt16/Cdk12/Gtf2h5/Ezh2/Supt4a/Ddx39b/Cdk13/Ctnnb1/Thoc1/Ctr9/Eapp/Eloa/Nelfe/Gtf2f1/Setd2/Cdc73	19
GO:0010833	GO:0010833	telomere maintenance via telomere lengthening	19/1569	74/28814	1.04801738248558e-08	2.15948894242634e-07	1.56125286872749e-07	Hsp90ab1/Hsp90aa1/Cct3/Hnrnpa2b1/Hnrnpu/Cct8/Ptges3/Cct2/Cct4/Atr/Cct6a/Nop10/Tcp1/Dhx36/Rad50/Cct7/Cct5/Ctnnb1/Parp1	19
GO:0006122	GO:0006122	mitochondrial electron transport, ubiquinol to cytochrome c	8/1569	11/28814	1.08147824402662e-08	2.21116191365909e-07	1.59861104777987e-07	Uqcrh/Uqcrb/Cyc1/Cycs/Uqcr10/Uqcrq/Cyct/Uqcrfs1	8
GO:0070203	GO:0070203	regulation of establishment of protein localization to telomere	8/1569	11/28814	1.08147824402662e-08	2.21116191365909e-07	1.59861104777987e-07	Cct3/Cct8/Cct2/Cct4/Cct6a/Tcp1/Cct7/Cct5	8
GO:0030521	GO:0030521	androgen receptor signaling pathway	14/1569	40/28814	1.15812405274418e-08	2.35872755916044e-07	1.705297070958e-07	Ddx5/Dnaja1/Park7/Rwdd1/Hdac1/Ube3a/Smarca4/Rhoa/Tmf1/Ddx17/Kdm3a/Ncor1/Ep300/Sirt1	14
GO:0016482	GO:0016482	cytosolic transport	29/1569	161/28814	1.22008338905149e-08	2.47536149124869e-07	1.78962029090427e-07	Srsf10/Hook1/Rab14/Vps29/Snx3/Vamp3/Sh3glb1/Vps35/Rab6a/Tanc2/Kif1b/Kif5b/Gbf1/Cltc/Eps15/Pikfyve/Spag9/Vti1b/Usp7/Gcc2/Lamp1/Rab5a/Ap1g1/Snf8/Rdx/Evi5/Dop1a/Becn1/Arl1	29
GO:0006378	GO:0006378	mRNA polyadenylation	15/1569	47/28814	1.47720194117138e-08	2.98553265888085e-07	2.15846042866058e-07	Ythdc1/Papola/Nudt21/Zc3h14/Pabpn1/Wdr33/Rnf20/Fip1l1/Ctr9/Nelfe/Ahcyl1/App/Cstf2/Ssu72/Cdc73	15
GO:1904814	GO:1904814	regulation of protein localization to chromosome, telomeric region	9/1569	15/28814	1.52789600204157e-08	3.0762028285379e-07	2.22401254134055e-07	Cct3/Cct8/Cct2/Cct4/Cct6a/Tcp1/Cct7/Cct5/Gnl3	9
GO:0051984	GO:0051984	positive regulation of chromosome segregation	11/1569	24/28814	1.55789443974461e-08	3.12467420899348e-07	2.25905605571132e-07	Smc4/Smc6/Hnrnpu/Ncapg2/Smc5/Cenpe/Ncapg/Rad18/Smc2/Ncapd3/Becn1	11
GO:0034968	GO:0034968	histone lysine methylation	26/1569	135/28814	1.63834511694496e-08	3.27358730753207e-07	2.36671625147192e-07	Rif1/Kdm1a/Arid4b/Setdb1/Iws1/Nsd1/Nsd2/Ash1l/Jarid2/Kmt2a/Baz2a/Ezh2/Prdm9/Trmt112/Auts2/Kmt2e/Ctnnb1/Kmt2c/Kdm3a/Ctr9/Nelfe/Hdac2/Phf20/Sirt1/Kmt5b/Setd2	26
GO:0007030	GO:0007030	Golgi organization	26/1569	136/28814	1.92172474804071e-08	3.82532001732632e-07	2.76560427493605e-07	Cdc42/Tmed2/Hook1/Huwe1/Rab2a/Stk25/Tmed10/Pdcd10/Bet1/Yipf4/Lman2/Akap9/Gbf1/Cdk1/Hikeshi/Ywhaz/Cltc/Trip11/Vti1b/Gcc2/Nsfl1c/Ubxn2a/Trappc8/Rab1a/Sec22b/Arl1	26
GO:2001243	GO:2001243	negative regulation of intrinsic apoptotic signaling pathway	22/1569	101/28814	1.99217743141715e-08	3.95065261305468e-07	2.85621639652724e-07	Tpt1/Ppia/Hells/Dnaja1/Kdm1a/Park7/Mif/Uri1/Sod2/Atad5/Usp47/Vdac2/Hdac1/Sh3glb1/Pttg1ip/Fignl1/Ndufs3/Hif1a/Tmbim6/Hdac2/Mdm2/Sirt1	22
GO:0043631	GO:0043631	RNA polyadenylation	15/1569	48/28814	2.04064425181048e-08	4.03160989823981e-07	2.91474635297038e-07	Ythdc1/Papola/Nudt21/Zc3h14/Pabpn1/Wdr33/Rnf20/Fip1l1/Ctr9/Nelfe/Ahcyl1/App/Cstf2/Ssu72/Cdc73	15
GO:2000058	GO:2000058	regulation of ubiquitin-dependent protein catabolic process	29/1569	165/28814	2.15727766328558e-08	4.22665751714548e-07	3.05576057562845e-07	Rack1/Sumo2/Hsp90ab1/Rbx1/Ubxn1/Park7/Sumo1/Ube2k/Vcp/Smarcc1/Ube3a/Csnk2a1/Csnk2a2/Eif3h/Ptk2/Ube2v2/Fbxw7/Rybp/Xpo1/Cdc20/Usp7/Gclc/Mdm2/Commd1/Cop1/Arih1/Stub1/Bcap31/Rad23b	29
GO:0034976	GO:0034976	response to endoplasmic reticulum stress	38/1569	257/28814	2.16340763910764e-08	4.22665751714548e-07	3.05576057562845e-07	Calr/Selenok/Hsp90b1/Manf/Pdia6/Dnajc3/Ubxn1/Hspa5/Eif2s1/Park7/Tmed2/Ubxn4/Pdia3/Sec61b/Erlec1/Ube2k/Vcp/Psmc6/Ube2j2/Ptpn2/Dnajc10/Qrich1/Erp44/P4hb/Canx/Tmbim6/Usp19/Faf2/Faf1/Ep300/Sirt1/App/Clgn/Eif4g1/Ufm1/Serinc3/Stub1/Bcap31	38
GO:0090150	GO:0090150	establishment of protein localization to membrane	38/1569	257/28814	2.16340763910764e-08	4.22665751714548e-07	3.05576057562845e-07	Rack1/Hsp90aa1/Sec62/Srp9/Arl6ip1/Pdcd5/Hspa5/Naca/Golga4/Sec61b/Hspa4/Srp19/Arpc2/Tomm22/Srp14/Emc6/Emc7/Sec61g/Vamp3/Timm13/Romo1/Sh3glb1/Vps35/Sec63/Macf1/Rab10/Emc2/Mtch2/Pikfyve/Pak1/Ssr3/Chmp4b/Vps37a/Afdn/Snx27/Rab11a/Commd1/Oga	38
GO:0032886	GO:0032886	regulation of microtubule-based process	39/1569	268/28814	2.21481487073951e-08	4.31112488677156e-07	3.11682822943843e-07	Npm1/Tex101/Tpr/Pafah1b1/Rock1/Stmn1/Hnrnpu/Rock2/Ckap5/Senp6/Rae1/Taok1/Hdgfl3/Trim37/Rnf4/Tpx2/Cyld/Vps4b/Macf1/Akap9/Rhoa/Rac1/Mapre1/Cfap20/Cltc/Pak1/Kif3a/Alms1/Xpo1/Chmp4b/Dync1h1/Cep295/Eml4/Chordc1/Lamp1/Apc/Plk4/Sirt1/Tacc1	39
GO:0072522	GO:0072522	purine-containing compound biosynthetic process	30/1569	175/28814	2.24036693459485e-08	4.34482925734846e-07	3.14119558979765e-07	Atp5g2/Atp5j/Atp5e/Atp5l/Atp5b/Atp5h/Mpc2/Atp5j2/Nme2/Atp5g1/Atp5d/Ndufc2/Mpc1/Vcp/Impdh2/Atp5a1/Atp5o/Atp5g3/Adss/Atp5c1/Parp1/Dld/Gmps/Pkm/Pdk3/Nme1/Adk/Atp5k/Ak2/Hprt	30
GO:0071383	GO:0071383	cellular response to steroid hormone stimulus	29/1569	166/28814	2.4795697788479e-08	4.79111010381783e-07	3.46384473058259e-07	Calr/Ddx5/Hnrnpu/Dnaja1/Ptges3/Park7/Rwdd1/Uri1/Ube2l3/Eif4e/Hdac1/Ube3a/Smarca4/Taf7/Rhoa/Strn3/Tmf1/Ddx17/Pak1/Parp1/Safb/Ubr5/Kdm3a/Nedd4/Phb2/Ncor1/Ep300/Sirt1/Ufm1	29
GO:0140718	GO:0140718	facultative heterochromatin assembly	13/1569	36/28814	2.50544154950968e-08	4.82343218016918e-07	3.48721272911009e-07	Hells/Smarca5/Mphosph8/Kcnq1ot1/Kdm1a/Setdb1/Pphln1/Hdac1/Baz2a/Smarca4/Atf7ip2/Trim28/Sirt1	13
GO:0031124	GO:0031124	mRNA 3'-end processing	17/1569	63/28814	2.7674893994809e-08	5.30854784809518e-07	3.83793840930882e-07	Ythdc1/Papola/Nudt21/Zc3h14/Dhx36/Slbp/Pabpn1/Wdr33/Rnf20/Fip1l1/Ctr9/Nelfe/Ahcyl1/App/Cstf2/Ssu72/Cdc73	17
GO:0060623	GO:0060623	regulation of chromosome condensation	8/1569	12/28814	3.08843808301142e-08	5.88141187288276e-07	4.25210380951943e-07	H3f3b/H3f3a/Smarca5/Smc4/Wapl/Ncapg/Baz1b/Smc2	8
GO:0070202	GO:0070202	regulation of establishment of protein localization to chromosome	8/1569	12/28814	3.08843808301142e-08	5.88141187288276e-07	4.25210380951943e-07	Cct3/Cct8/Cct2/Cct4/Cct6a/Tcp1/Cct7/Cct5	8
GO:0010639	GO:0010639	negative regulation of organelle organization	48/1569	373/28814	3.11754804267737e-08	5.91549133997234e-07	4.27674235464601e-07	Npm1/H3f3b/H3f3a/Smarca5/Hormad1/Mphosph8/Tpr/Bub1/Slc25a31/Stmn1/Hnrnpu/Top2a/Cfl1/Higd1a/Ccp110/Wapl/Huwe1/Arpc2/Taok1/Rad50/Hdgfl3/Trim37/Sptan1/Tpx2/Cenpe/Pak2/Pfn1/Mtpn/Mapre1/Ik/Capza2/Parp1/Add3/Baz1b/Chmp4b/Eml4/Gdi2/Tex14/Tmsb15b2/Gclc/Apc/Tjp1/Rdx/Odf2l/Zfp207/Tmsb4x/Becn1/Sec22b	48
GO:0099111	GO:0099111	microtubule-based transport	33/1569	209/28814	3.63006894920112e-08	6.86330240395552e-07	4.96198445687819e-07	Dynll1/Hspa8/Pafah1b1/Fmr1/Hnrnpu/Sod1/Hspb11/Cdc42/Sfpq/Ift74/Pcm1/Ift81/Kif1b/Spg7/Kif5b/Actr10/Spast/Rpgr/Pura/Kif3a/Ift88/Ssna1/Ift20/Dync1h1/Hif1a/Hsbp1/Ap3s1/Lamp1/Mapk8ip3/App/Ofd1/Copg2/Rab1a	33
GO:0018022	GO:0018022	peptidyl-lysine methylation	27/1569	150/28814	3.90037156146766e-08	7.3480214238364e-07	5.31242337112682e-07	Rif1/Kdm1a/Arid4b/Setdb1/Iws1/Nsd1/Nsd2/Ash1l/Jarid2/Kmt2a/Baz2a/Ezh2/Prdm9/Trmt112/Auts2/Kmt2e/Ctnnb1/Kmt2c/Setd3/Kdm3a/Ctr9/Nelfe/Hdac2/Phf20/Sirt1/Kmt5b/Setd2	27
GO:0043967	GO:0043967	histone H4 acetylation	18/1569	72/28814	3.99539739214062e-08	7.50025667029956e-07	5.42248539116893e-07	Actb/Brca2/Hat1/Iws1/Morf4l1/Kmt2a/Mrgbp/Ep400/Taf7/Mbtd1/Atf2/Auts2/Phf20/Morf4l2/Ep300/Sirt1/Jade3/Ruvbl1	18
GO:0007623	GO:0007623	circadian rhythm	34/1569	221/28814	4.37653425656056e-08	8.18660219977198e-07	5.91869489045126e-07	Ddx5/Hnrnpu/Top2a/Rock2/Kdm5b/Kdm5a/Sfpq/Mycbp2/Top1/Mat2a/Usp9x/Thrap3/Huwe1/Pspc1/Impdh2/Hdac1/Ube3a/Kmt2a/Ezh2/Cdk1/Fbxw7/Hnrnpd/Kdm2a/Ppp1cb/Ppp1ca/Maged1/Usp7/Tardbp/Ncor1/Hdac2/Ddb1/Setx/Ep300/Sirt1	34
GO:0034724	GO:0034724	DNA replication-independent chromatin organization	10/1569	21/28814	4.52150265509968e-08	8.42788922461159e-07	6.09313896947225e-07	H3f3b/Nasp/H3f3a/Hat1/Supt16/Ubn1/Rbbp4/Cenpp/Asf1b/Ubn2	10
GO:0007018	GO:0007018	microtubule-based movement	52/1569	426/28814	4.91189759439741e-08	9.12333091917125e-07	6.59592475333648e-07	Taf7l/Dynll1/Tex101/Ly6k/Hspa8/Pafah1b1/Fmr1/Hnrnpu/Dnaja1/Sod1/Ube2b/Hspb11/Cdc42/Sfpq/Ddx4/Ift74/Kif23/Pcm1/Ash1l/Kif2a/Cenpe/Ift81/Lztfl1/Kif1b/Slirp/Spg7/Kif5b/Actr10/Vps13a/Tmf1/Cfap20/Spast/Rpgr/Pura/Dynlrb1/Kif3a/Kif20b/Ift88/Ssna1/Ift20/Dync1h1/Dynlt1b/Hif1a/Hsbp1/Ap3s1/Lamp1/Mapk8ip3/Kif15/App/Ofd1/Copg2/Rab1a	52
GO:0000387	GO:0000387	spliceosomal snRNP assembly	12/1569	32/28814	5.31224559461184e-08	9.83231421458858e-07	7.10850075319619e-07	Snrpf/Snrpe/Snrpg/Snrpd1/Snrpd2/Lsm2/Snrpb/Lsm4/Strap/Snrpd3/Snrpc/Prpf8	12
GO:0031023	GO:0031023	microtubule organizing center organization	26/1569	143/28814	5.60329741933714e-08	1.03347531073438e-06	7.47175066259052e-07	Npm1/Pafah1b1/Brca2/Rock2/Ckap5/Ccp110/Ranbp1/Pcm1/Ppp1r12a/Trim37/Vps4b/Ctnnb1/Kif3a/Alms1/Xpo1/Bnip2/Chmp4b/Cep295/Gcc2/Nsfl1c/Chordc1/Haus6/Plk4/Cep85/Sirt1/Chd3	26
GO:0045931	GO:0045931	positive regulation of mitotic cell cycle	25/1569	134/28814	5.92722867298717e-08	1.08941223867621e-06	7.87615972207318e-07	Pafah1b1/Hmgb1/Brca2/Anp32b/Cul3/Pkn2/Anapc5/Eif4e/Ankrd17/Cenpe/Vps4b/Cdk1/Hspa2/Cul4b/Kmt2e/Dtl/Larp7/Dbf4/Phb2/Rab11a/Anapc11/Mdm2/Rdx/App/Eif4g1	25
GO:0043254	GO:0043254	regulation of protein-containing complex assembly	52/1569	429/28814	6.17603504971181e-08	1.13120086413992e-06	8.17828033081356e-07	H3f3b/Rack1/Mphosph8/Hsp90aa1/Hmgb1/Stmn1/Ckap5/Cfl1/Cdc42/Arpc1a/Atr/Park7/Sumo1/Senp6/Vcp/Arpc2/Rasa1/Vdac2/Sar1a/Brk1/Dnajc15/Rnf4/Sptan1/Psmc6/Arpc5l/Sh3glb1/Vps35/Unc13b/Akap9/Pfn1/Rhoa/Rac1/Mtpn/Mapre1/Dut/Fnip1/Pak1/Capza2/Parp1/Add3/Slf1/Tmsb15b2/Apc/Rdx/Faf1/Ep300/Slf2/Eif4g1/Tmsb4x/Lamp2/Stub1/Bag4	52
GO:0051099	GO:0051099	positive regulation of binding	31/1569	193/28814	6.2379681008171e-08	1.13859106338444e-06	8.23170949891108e-07	Hsp90ab1/Hmgb1/Fmr1/Stmn1/Ran/Hmgb2/Eif2s1/Calm1/Park7/Eif3e/Caprin2/Hspa4/Lamtor5/Pin1/Smarca4/Krit1/Nmd3/Mapre1/Mark3/Eif3d/Ctnnb1/Parp1/Map1lc3b/Hnrnpl/Nme1/Ppp2ca/Trim28/Gtf2b/Ep300/App/Eif4g1	31
GO:0045911	GO:0045911	positive regulation of DNA recombination	18/1569	74/28814	6.31575717358841e-08	1.14881445140272e-06	8.30562186566636e-07	Actb/Zcwpw1/Rif1/Ube2b/Fus/Rbbp8/Nsd2/Atad5/Morf4l1/Mrgbp/Ep400/Hdgfl2/Prdm9/Mbtd1/Parp1/Morf4l2/Kmt5b/Ruvbl1	18
GO:2001234	GO:2001234	negative regulation of apoptotic signaling pathway	36/1569	246/28814	6.57963756287899e-08	1.19270062351157e-06	8.62290717681699e-07	Tpt1/Ppia/Hells/Slc25a31/Dnaja1/Higd1a/Hmgb2/Kdm1a/Gclm/Park7/Cdk11b/Mif/Uri1/Rnf34/Sod2/Rb1cc1/Atad5/Usp47/Vdac2/Hdac1/Sh3glb1/Gnai2/Pttg1ip/Ctnnb1/Gnai3/Fignl1/Ndufs3/Birc6/Hif1a/Ctnna1/Tmbim6/Bmi1/Hdac2/Gclc/Mdm2/Sirt1	36
GO:0035601	GO:0035601	protein deacylation	25/1569	135/28814	6.90197493572402e-08	1.24259105071482e-06	8.98360164976761e-07	Smarca5/Kdm5a/Nipbl/Sfpq/Chd4/Sin3b/Morf4l1/Hdac1/Baz2a/Rbbp7/Rbbp4/Akap8l/Gatad2a/Sgf29/Mier1/Ncor1/Suds3/Hdac2/Dr1/Morf4l2/Ep300/Sirt1/BC004004/Smarcad1/Chd3	25
GO:0098732	GO:0098732	macromolecule deacylation	25/1569	135/28814	6.90197493572402e-08	1.24259105071482e-06	8.98360164976761e-07	Smarca5/Kdm5a/Nipbl/Sfpq/Chd4/Sin3b/Morf4l1/Hdac1/Baz2a/Rbbp7/Rbbp4/Akap8l/Gatad2a/Sgf29/Mier1/Ncor1/Suds3/Hdac2/Dr1/Morf4l2/Ep300/Sirt1/BC004004/Smarcad1/Chd3	25
GO:0009314	GO:0009314	response to radiation	52/1569	431/28814	7.18324932193891e-08	1.28581677812738e-06	9.2961121220364e-07	Npm1/Brca2/Fmr1/Tipin/Swi5/Cirbp/Ckap5/Kras/Ube2b/Eif2s1/Nipbl/Kdm1a/Atr/Topbp1/Pcna/Gnb1/Dhx36/Sod2/Nabp1/Gtf2h5/Usp47/Nek1/Kmt2a/Rnf4/Nucks1/Cops9/Fbxw7/Mtch2/Cul4b/Rpgr/Dtl/Dynlrb1/Yy1/Pde6d/Parp1/Eef1d/Rad18/Ift20/Fignl1/Ppp1cb/Ppp1ca/Hif1a/Nedd4/Mdm2/Ddb1/Ep300/Sirt1/Ddhd2/App/Cop1/Rbp4/Ap1s2	52
GO:0061136	GO:0061136	regulation of proteasomal protein catabolic process	30/1569	184/28814	7.19082368810572e-08	1.28581677812738e-06	9.2961121220364e-07	Rack1/Sumo2/Hsp90ab1/Fmr1/Rbx1/Ubxn1/Park7/Sumo1/Ube2k/Vcp/Smarcc1/Eif3h/Psmd14/Ube2v2/Tmf1/Fbxw7/Rybp/Xpo1/Cdc20/Gabarapl2/Usp7/Usp19/Gclc/Mdm2/Commd1/Cop1/Arih1/Stub1/Bcap31/Rad23b	30
GO:0032206	GO:0032206	positive regulation of telomere maintenance	17/1569	67/28814	7.48563551687091e-08	1.3340110591721e-06	9.64454391096135e-07	Cct3/Hnrnpa2b1/Cct8/Cct2/Cct4/Atr/Cct6a/Tcp1/Dhx36/Rad50/Cct7/Cct5/Hnrnpd/Yy1/Ctnnb1/Gnl3/Ruvbl1	17
GO:0033182	GO:0033182	regulation of histone ubiquitination	8/1569	13/28814	7.6440877995965e-08	1.35766205868254e-06	9.8155343249825e-07	Kdm1a/Park7/Trip12/Ube2n/Rnf20/Ubr5/Kdm2a/Ctr9	8
GO:0051865	GO:0051865	protein autoubiquitination	18/1569	75/28814	7.88948068946908e-08	1.39654398110568e-06	1.00966402465371e-06	Rbx1/Ube2b/Ube2t/Cul3/Trim52/Ube3a/Trim37/Rnf4/Rnf10/Hectd1/Cnot4/Rnf11/Rad18/Nfx1/Uhrf2/Mdm2/Rnf187/Stub1	18
GO:0039694	GO:0039694	viral RNA genome replication	12/1569	33/28814	7.93376313653644e-08	1.39968563696421e-06	1.01193535798879e-06	Mphosph8/Pcbp2/Fmr1/Top2a/Rock2/Cdc42/Setdb1/Top2b/Eea1/Pcbp1/Rab5a/Trim28	12
GO:0006979	GO:0006979	response to oxidative stress	50/1569	409/28814	8.43089962716839e-08	1.47525272030579e-06	1.06656834236326e-06	Ppia/Rack1/Prdx4/Selenok/Prdx1/Cfl1/Sod1/Psip1/Eif2s1/Sfpq/Gclm/Park7/Cst3/Ndufa6/Rwdd1/Ndufb4/Chchd2/Stk25/Sod2/Pdcd10/Hmox2/Ndufa12/Ezh2/Romo1/Atox1/Lig1/Atp2a2/Chd6/Akr1b3/Psmb5/Atf2/Fbxw7/Rnf7/Ctnnb1/Parp1/P4hb/Hif1a/Mapkap1/Kpna4/Prdx5/Hdac2/Gclc/Chuk/Setx/Sirt1/Pnpla8/App/Hnrnpm/Dhfr/Fut8	50
GO:0000288	GO:0000288	nuclear-transcribed mRNA catabolic process, deadenylation-dependent decay	16/1569	60/28814	8.4739634929413e-08	1.47525272030579e-06	1.06656834236326e-06	Hnrnpu/Ybx1/Pabpc1/Dhx36/Tnrc6c/Csde1/Syncrip/Eif4enif1/Hnrnpd/Polr2g/Paip1/Cnot6l/Tnrc6b/Exosc8/Rc3h2/Samd4b	16
GO:0006278	GO:0006278	RNA-templated DNA biosynthetic process	16/1569	60/28814	8.4739634929413e-08	1.47525272030579e-06	1.06656834236326e-06	Hsp90ab1/Hsp90aa1/Cct3/Hnrnpu/Cct8/Ptges3/Cct2/Cct4/Atr/Cct6a/Nop10/Tcp1/Rad50/Cct7/Cct5/Ctnnb1	16
GO:0007004	GO:0007004	telomere maintenance via telomerase	16/1569	60/28814	8.4739634929413e-08	1.47525272030579e-06	1.06656834236326e-06	Hsp90ab1/Hsp90aa1/Cct3/Hnrnpu/Cct8/Ptges3/Cct2/Cct4/Atr/Cct6a/Nop10/Tcp1/Rad50/Cct7/Cct5/Ctnnb1	16
GO:0007281	GO:0007281	germ cell development	48/1569	386/28814	9.03965513973549e-08	1.56855858099029e-06	1.13402598930961e-06	Stra8/Dazl/H3f3b/Taf7l/H3f3a/4930447C04Rik/Hormad1/Sycp1/Pafah1b1/Brca2/1700013H16Rik/Tut4/Meioc/Sycp3/Ythdc1/Ube2b/Hmgb2/Rnf17/Dmc1/Qk/Hook1/Ythdc2/Cntrl/Tdrkh/Mdk/Taf4b/Selenof/Slirp/Hspa2/Ythdf2/Tmf1/Strbp/Aff4/Ctnnb1/Alms1/Celf1/Ift88/Rsph1/Dld/Tial1/Kdm3a/Topaz1/Hfm1/Xlr/Brip1/Adad1/Agfg1/Rnf2	48
GO:0008088	GO:0008088	axo-dendritic transport	19/1569	84/28814	9.60082493173794e-08	1.66047054147271e-06	1.200475883613e-06	Hspa8/Pafah1b1/Fmr1/Hnrnpu/Sod1/Sfpq/Kif1b/Spg7/Kif5b/Actr10/Spast/Pura/Kif3a/Dync1h1/Hif1a/Hsbp1/Ap3s1/Mapk8ip3/App	19
GO:0043393	GO:0043393	regulation of protein binding	33/1569	218/28814	1.01845634871041e-07	1.75567230047301e-06	1.26930421444025e-06	Rack1/Actb/Hsp90ab1/Rock1/Ran/Ppp1r2/Cdc42/Kdm1a/Atr/Park7/Hnrnpk/Caprin2/Hspa4/Cycs/Senp2/Cyld/Pin1/Atp2a2/Krit1/Aplp2/Lrpap1/Nmd3/Mapre1/Mark3/Map1lc3b/Tmbim6/Tex14/Ppp2ca/Gtf2f1/Ep300/Adnp/App/Stub1	33
GO:0034063	GO:0034063	stress granule assembly	11/1569	28/28814	1.09471436241985e-07	1.88098314715463e-06	1.35990061205113e-06	Ubap2l/Cirbp/Eif2s1/Prrc2c/Csde1/Ddx6/Ythdf2/Dync1h1/G3bp1/Atxn2/G3bp2	11
GO:0007098	GO:0007098	centrosome cycle	24/1569	129/28814	1.14466273901808e-07	1.96042076244168e-06	1.41733188771787e-06	Npm1/Brca2/Rock2/Ckap5/Ccp110/Ranbp1/Pcm1/Ppp1r12a/Trim37/Vps4b/Ctnnb1/Kif3a/Alms1/Xpo1/Bnip2/Chmp4b/Cep295/Nsfl1c/Chordc1/Haus6/Plk4/Cep85/Sirt1/Chd3	24
GO:0006261	GO:0006261	DNA-templated DNA replication	26/1569	148/28814	1.14854822443859e-07	1.96070934754485e-06	1.41754052704514e-06	Npm1/Brca2/Tipin/Alyref/Atr/Topbp1/Rfc4/Pcna/Bod1l/Atad5/Orc6/Pole4/Senp2/Lig1/Nucks1/Lig3/Pura/Mcm5/Dbf4/Pole3/Ddx21/Ccne2/Thoc1/Prim1/Pole/Orc4	26
GO:0032786	GO:0032786	positive regulation of DNA-templated transcription, elongation	12/1569	34/28814	1.16533104191894e-07	1.98294233745884e-06	1.43361438535563e-06	Eloc/Alyref/Supt16/Cdk12/Supt4a/Ddx39b/Cdk13/Ctnnb1/Thoc1/Eapp/Gtf2f1/Cdc73	12
GO:0032784	GO:0032784	regulation of DNA-templated transcription, elongation	15/1569	54/28814	1.18572936610412e-07	2.00471871993565e-06	1.44935812867585e-06	Hnrnpu/Eloc/Alyref/Supt16/Cdk12/Ezh2/Supt4a/Ddx39b/Cdk13/Ctnnb1/Thoc1/Eapp/Nelfe/Gtf2f1/Cdc73	15
GO:0065002	GO:0065002	intracellular protein transmembrane transport	15/1569	54/28814	1.18572936610412e-07	2.00471871993565e-06	1.44935812867585e-06	Tomm7/Sec62/Tomm20/Hspa5/Dnajc19/Hspd1/Sec61b/Sec61g/Dnajc15/Romo1/Sec63/Pex13/Timm23/Timm17b/Pex7	15
GO:0070200	GO:0070200	establishment of protein localization to telomere	9/1569	18/28814	1.27830125991962e-07	2.15432560577508e-06	1.55751991413781e-06	Cct3/Brca2/Cct8/Cct2/Cct4/Cct6a/Tcp1/Cct7/Cct5	9
GO:0072599	GO:0072599	establishment of protein localization to endoplasmic reticulum	14/1569	48/28814	1.59607279200785e-07	2.68130062988579e-06	1.93850879163407e-06	Sec62/Srp9/Hspa5/Sec61b/Spcs2/Srp19/Srp14/Sec61g/Sec63/Macf1/Rab10/Ssr3/Chmp4b/Spcs1	14
GO:1902115	GO:1902115	regulation of organelle assembly	32/1569	213/28814	1.88743924370003e-07	3.16071174937068e-06	2.28511023556398e-06	Npm1/Dynll1/Tpr/Hnrnpu/Ccp110/Senp6/Vdac3/Ccdc88a/Arpc2/Trim37/Rnf4/Cyld/Sh3glb1/Vps4b/Tsg101/Rhoa/Pikfyve/Alms1/Ift88/Ift20/Chmp4b/Dync1h1/G3bp1/Cep295/Gdi2/Cnot6l/Plk4/Rdx/G3bp2/Odf2l/Becn1/Sec22b	32
GO:0051170	GO:0051170	import into nucleus	29/1569	182/28814	1.9584336345107e-07	3.26666388971504e-06	2.36171080517588e-06	Ddx5/Tpr/Hspa8/Hsp90ab1/Ran/Cfl1/Sumo1/Ranbp2/Nup88/Nup153/Eif4enif1/Cdk1/Hikeshi/Atf2/Rab18/Pttg1ip/Pkig/Appl1/Ubr5/Phb2/Kpna4/Tardbp/Ppp2ca/Trim28/Nup54/Kpna3/Kpna2/Ufm1/Nxt1	29
GO:0045786	GO:0045786	negative regulation of cell cycle	46/1569	372/28814	1.96309469770553e-07	3.26666388971504e-06	2.36171080517588e-06	Npm1/Smarca5/Hormad1/Tpr/Bub1/Tipin/Meioc/Ccp110/Atr/Topbp1/Sin3b/Wapl/Ythdc2/Nae1/Nabp1/Usp47/Nek1/Taok1/Rad17/Cdc5l/Trim37/Ezh2/Cenpe/Inca1/Btg3/Brd7/Cdk1/Gmnn/Mov10l1/Gigyf2/Atf2/Ddx39b/Dtl/Ctnnb1/Ik/Clspn/Baz1b/Thoc1/Tex14/Angel2/Apc/Mdm2/Sirt1/Zfp207/Cdc73/Ppp1r13b	46
GO:0009165	GO:0009165	nucleotide biosynthetic process	32/1569	215/28814	2.34599437929599e-07	3.87934807234681e-06	2.8046651167099e-06	Atp5g2/Atp5j/Atp5e/Atp5l/Atp5b/Atp5h/Mpc2/Atp5j2/Nme2/Atp5g1/Atp5d/Ndufc2/Mpc1/Vcp/Impdh2/Atp5a1/Atp5o/Atp5g3/Adss/Atp5c1/Dut/Parp1/Cmpk1/Dld/Gmps/Pkm/Pdk3/Nme1/Adk/Atp5k/Ak2/Hprt	32
GO:0009566	GO:0009566	fertilization	32/1569	215/28814	2.34599437929599e-07	3.87934807234681e-06	2.8046651167099e-06	Tex15/H3f3b/Snu13/H3f3a/Tex101/Ly6k/Ubap2l/Cct3/Cct8/Kdm5b/Cct2/Cct4/Park7/Cct6a/Sycp2/Tcp1/Ash1l/Vdac2/Ube3a/Tdrkh/Cct7/Cct5/Tex11/Mael/Unc13b/Slirp/Prdm9/Meiob/Kmt2c/Cecr2/Ube2q1/Clgn	32
GO:0070897	GO:0070897	transcription preinitiation complex assembly	12/1569	36/28814	2.40287359551242e-07	3.9609869426025e-06	2.8636878409676e-06	Taf7l/Hmgb1/Gtf2a2/Psmc6/Taf7/Taf10/Taf1/Taf11/Dr1/Gtf2b/Taf1b/Bdp1	12
GO:0006470	GO:0006470	protein dephosphorylation	35/1569	249/28814	2.70520181236395e-07	4.44546403745166e-06	3.21395184987526e-06	Ppia/Hsp90ab1/Hsp90b1/Rock1/Rock2/Ppp1r2/Calm1/Arpp19/Ywhae/Bod1l/Camta1/Ppp4r2/Ppp1r12a/Calm2/Pin1/Calm3/Gnai2/Ppp4r3b/Ppp2r2d/Ptpra/Ptpn2/Ppm1g/Ppp4r3a/Ppp1cb/Ppp1ca/Ublcp1/Ptp4a2/Ppp3cb/Ppp2ca/Acp1/Ctdspl2/Mprip/Ssu72/Ppp4c/Ensa	35
GO:0007006	GO:0007006	mitochondrial membrane organization	21/1569	107/28814	2.73958553912868e-07	4.48798562698875e-06	3.24469382421157e-06	Hsp90aa1/Slc25a31/Pdcd5/Siva1/Hspa4/Tomm22/Vdac2/Timm13/Romo1/Chchd6/Sh3glb1/Immt/Spg7/Atf2/Mtch2/Chchd10/Dynlt1b/Bnip3l/Micos13/Gclc/Atpif1	21
GO:0033120	GO:0033120	positive regulation of RNA splicing	14/1569	50/28814	2.80092527943983e-07	4.57426651673223e-06	3.30707260466368e-06	Ncl/Hspa8/Cirbp/Polr2a/Tra2a/Snrnp70/Hnrnpk/Thrap3/Srsf5/Rbmxl2/Srsf1/Setx/Tra2b/Dazap1	14
GO:0032984	GO:0032984	protein-containing complex disassembly	34/1569	239/28814	2.99177094663078e-07	4.8708616492214e-06	3.5215029693448e-06	Mphosph8/Hspa8/Stmn1/Eif5a/Cfl1/Etf1/Supt16/Gspt1/Vcp/Arpc2/Smarcc1/Taok1/Smarce1/Hdgfl3/Sptan1/Tpx2/Vps4b/Smarca4/Atp2a2/Kif5b/Cfl2/Mtpn/Capza2/Add3/Map1lc3b/Chmp4b/Eml4/Smarcd1/Apc/Rdx/Setx/Lamp2/Becn1/Oga	34
GO:0048511	GO:0048511	rhythmic process	40/1569	307/28814	3.08342151914182e-07	5.00463031183788e-06	3.61821414213792e-06	Ddx5/Rack1/Hnrnpu/Top2a/Rock2/Kdm5b/Kdm5a/Sfpq/Mycbp2/Top1/Mat2a/Usp9x/Thrap3/Huwe1/Pspc1/Impdh2/Hdac1/Ube3a/Kmt2a/Csnk2a1/Ezh2/Mdk/Cdk1/Fbxw7/Hnrnpd/Dtl/Scaper/Kdm2a/Cbx3/Ppp1cb/Ppp1ca/Maged1/Usp7/Tardbp/Ncor1/Hdac2/Ddb1/Setx/Ep300/Sirt1	40
GO:0051225	GO:0051225	spindle assembly	22/1569	117/28814	3.14551186701711e-07	5.08974696273474e-06	3.67975120897739e-06	Smc3/Tpr/Hnrnpu/Stag1/Senp6/Kif23/Rnf4/Tpx2/Kif2a/Cenpe/Vps4b/Rhoa/Mapre1/Cltc/Prc1/Cdc20/Chmp4b/Dync1h1/Rab11a/Ncor1/Haus6/Zfp207	22
GO:0032434	GO:0032434	regulation of proteasomal ubiquitin-dependent protein catabolic process	24/1569	136/28814	3.19443820199973e-07	5.13972415011105e-06	3.71588338156195e-06	Rack1/Sumo2/Hsp90ab1/Rbx1/Ubxn1/Park7/Sumo1/Ube2k/Vcp/Smarcc1/Eif3h/Ube2v2/Rybp/Xpo1/Cdc20/Usp7/Gclc/Mdm2/Commd1/Cop1/Arih1/Stub1/Bcap31/Rad23b	24
GO:0009408	GO:0009408	response to heat	20/1569	99/28814	3.2056289012067e-07	5.13972415011105e-06	3.71588338156195e-06	Tpr/Hsp90ab1/Hsp90aa1/Dnaja1/Sod1/Psip1/Eif2s1/Dnaja2/Sumo1/Ywhae/Dhx36/Hspa4/Vcp/Rbbp7/Hikeshi/Eif2b3/Chordc1/Hsbp1/Gclc/Stub1	20
GO:1901992	GO:1901992	positive regulation of mitotic cell cycle phase transition	20/1569	99/28814	3.2056289012067e-07	5.13972415011105e-06	3.71588338156195e-06	Anp32b/Cul3/Anapc5/Ankrd17/Cenpe/Vps4b/Cdk1/Hspa2/Cul4b/Kmt2e/Dtl/Larp7/Dbf4/Phb2/Rab11a/Anapc11/Mdm2/Rdx/App/Eif4g1	20
GO:0006368	GO:0006368	transcription elongation from RNA polymerase II promoter	15/1569	58/28814	3.31783625897917e-07	5.27156212834793e-06	3.81119872107848e-06	Hnrnpu/Eloc/Supt16/Cdk12/Ezh2/Supt4a/Cdk13/Ctnnb1/Ctr9/Eapp/Eloa/Nelfe/Gtf2f1/Setd2/Cdc73	15
GO:0031062	GO:0031062	positive regulation of histone methylation	15/1569	58/28814	3.31783625897917e-07	5.27156212834793e-06	3.81119872107848e-06	Smarca5/Rif1/Jarid2/Kmt2a/Baz2a/Prdm9/Rnf20/Auts2/Kmt2e/Ctnnb1/Ctr9/Chtop/Nelfe/Phf20/Sirt1	15
GO:0071806	GO:0071806	protein transmembrane transport	15/1569	58/28814	3.31783625897917e-07	5.27156212834793e-06	3.81119872107848e-06	Tomm7/Sec62/Tomm20/Hspa5/Dnajc19/Hspd1/Sec61b/Sec61g/Dnajc15/Romo1/Sec63/Pex13/Timm23/Timm17b/Pex7	15
GO:1904358	GO:1904358	positive regulation of telomere maintenance via telomere lengthening	12/1569	37/28814	3.38009607993563e-07	5.35435640290103e-06	3.87105677180553e-06	Cct3/Hnrnpa2b1/Cct8/Cct2/Cct4/Atr/Cct6a/Tcp1/Dhx36/Cct7/Cct5/Ctnnb1	12
GO:0007130	GO:0007130	synaptonemal complex assembly	10/1569	25/28814	3.42815251648112e-07	5.41422291150835e-06	3.91433865969464e-06	Tex15/Syce3/Syce2/4930447C04Rik/Hormad1/Sycp1/Meioc/Sycp3/Tex12/Tex11	10
GO:0006986	GO:0006986	response to unfolded protein	22/1569	118/28814	3.66943502021984e-07	5.77799096467452e-06	4.17733325318349e-06	Hspa8/Hsp90aa1/Manf/Pdia6/Dnajc3/Hspa5/Eif2s1/Tmed2/Ubxn4/Hspd1/Hspa9/Ube2j2/Hspa4l/Hspa2/Ptpn2/Dnajc10/Qrich1/Erp44/Tmbim6/Faf2/Ep300/Stub1	22
GO:0071478	GO:0071478	cellular response to radiation	28/1569	177/28814	3.68168063609298e-07	5.78001945100907e-06	4.17879979466318e-06	Npm1/Brca2/Fmr1/Swi5/Eif2s1/Nipbl/Kdm1a/Atr/Pcna/Dhx36/Gtf2h5/Usp47/Rnf4/Nucks1/Cops9/Fbxw7/Mtch2/Cul4b/Rpgr/Yy1/Parp1/Eef1d/Fignl1/Nedd4/Mdm2/Ddb1/Ep300/Sirt1	28
GO:0070198	GO:0070198	protein localization to chromosome, telomeric region	11/1569	31/28814	3.70938340839646e-07	5.78905250866607e-06	4.18533045425735e-06	Cct3/Brca2/Cct8/Cct2/Cct4/Atr/Cct6a/Tcp1/Cct7/Cct5/Gnl3	11
GO:0070979	GO:0070979	protein K11-linked ubiquitination	11/1569	31/28814	3.70938340839646e-07	5.78905250866607e-06	4.18533045425735e-06	Ube2s/Ube2b/Ube2d3/Ube2t/Anapc5/Ube2l3/Rnf4/Ube2e3/Anapc10/Anapc13/Anapc11	11
GO:0045047	GO:0045047	protein targeting to ER	13/1569	44/28814	3.74000642823954e-07	5.80250997322459e-06	4.19505984195414e-06	Sec62/Srp9/Hspa5/Sec61b/Spcs2/Srp19/Srp14/Sec61g/Sec63/Macf1/Ssr3/Chmp4b/Spcs1	13
GO:0050685	GO:0050685	positive regulation of mRNA processing	13/1569	44/28814	3.74000642823954e-07	5.80250997322459e-06	4.19505984195414e-06	Ncl/Hspa8/Cirbp/Tra2a/Snrnp70/Nudt21/Dhx36/Thrap3/Rbmxl2/Adarb1/Tra2b/Dazap1/Cdc73	13
GO:0044417	GO:0044417	translocation of molecules into host	7/1569	11/28814	3.80894579125792e-07	5.8749090786215e-06	4.24740246282778e-06	Alyref/Tcp1/Thoc2/Thoc7/Ddx39b/Thoc1/Thoc3	7
GO:0140719	GO:0140719	constitutive heterochromatin assembly	7/1569	11/28814	3.80894579125792e-07	5.8749090786215e-06	4.24740246282778e-06	H3f3b/H3f3a/Hells/Hat1/Rif1/Smchd1/Ezh2	7
GO:1901293	GO:1901293	nucleoside phosphate biosynthetic process	32/1569	220/28814	3.98472512134193e-07	6.12811224929407e-06	4.43046159724469e-06	Atp5g2/Atp5j/Atp5e/Atp5l/Atp5b/Atp5h/Mpc2/Atp5j2/Nme2/Atp5g1/Atp5d/Ndufc2/Mpc1/Vcp/Impdh2/Atp5a1/Atp5o/Atp5g3/Adss/Atp5c1/Dut/Parp1/Cmpk1/Dld/Gmps/Pkm/Pdk3/Nme1/Adk/Atp5k/Ak2/Hprt	32
GO:0006336	GO:0006336	DNA replication-independent chromatin assembly	9/1569	20/28814	3.99791988166765e-07	6.13053121389444e-06	4.43221044408871e-06	H3f3b/Nasp/H3f3a/Hat1/Ubn1/Rbbp4/Cenpp/Asf1b/Ubn2	9
GO:0006606	GO:0006606	protein import into nucleus	28/1569	178/28814	4.14491358555931e-07	6.33751280110879e-06	4.58185260731697e-06	Ddx5/Tpr/Hspa8/Hsp90ab1/Ran/Cfl1/Sumo1/Ranbp2/Nup88/Nup153/Eif4enif1/Cdk1/Hikeshi/Atf2/Pttg1ip/Pkig/Appl1/Ubr5/Phb2/Kpna4/Tardbp/Ppp2ca/Trim28/Nup54/Kpna3/Kpna2/Ufm1/Nxt1	28
GO:1900151	GO:1900151	regulation of nuclear-transcribed mRNA catabolic process, deadenylation-dependent decay	10/1569	26/28814	5.29838161471013e-07	8.07773497618379e-06	5.8399867934575e-06	Hnrnpu/Ybx1/Pabpc1/Dhx36/Tnrc6c/Csde1/Syncrip/Hnrnpd/Paip1/Tnrc6b	10
GO:1905818	GO:1905818	regulation of chromosome separation	17/1569	76/28814	5.32555078005864e-07	8.09575803020441e-06	5.85301698048004e-06	Tpr/Smc4/Bub1/Cul3/Anapc5/Ncapg2/Csnk2a1/Csnk2a2/Cenpe/Ncapg/Ik/Smc2/Tex14/Ncapd3/Apc/Anapc11/Zfp207	17
GO:0035966	GO:0035966	response to topologically incorrect protein	24/1569	140/28814	5.54564515079227e-07	8.40611441679001e-06	6.07739636458573e-06	Hspa8/Hsp90aa1/Manf/Pdia6/Dnajc3/Hspa5/Eif2s1/Cul3/Tmed2/Ubxn4/Hspd1/Vcp/Hspa9/Ube2j2/Hspa4l/Hspa2/Ptpn2/Dnajc10/Qrich1/Erp44/Tmbim6/Faf2/Ep300/Stub1	24
GO:0016579	GO:0016579	protein deubiquitination	23/1569	131/28814	6.13479254920274e-07	9.27250163239095e-06	6.7037711976358e-06	Ubxn1/Park7/Usp34/Usp3/Usp9x/Eny2/Usp26/Usp16/Vcp/Usp47/Cyld/Usp15/Taf7/Psmd14/Uchl3/Usp37/Otud4/Taf10/Sgf29/Usp8/Usp7/Zranb1/Usp19	23
GO:0032204	GO:0032204	regulation of telomere maintenance	19/1569	94/28814	6.22492265603008e-07	9.35511880642697e-06	6.7635012094158e-06	Cct3/Hnrnpa2b1/Hnrnpu/Cct8/Cct2/Cct4/Atr/Cct6a/Tcp1/Dhx36/Rad50/Cct7/Cct5/Hnrnpd/Yy1/Ctnnb1/Parp1/Gnl3/Ruvbl1	19
GO:0035304	GO:0035304	regulation of protein dephosphorylation	19/1569	94/28814	6.22492265603008e-07	9.35511880642697e-06	6.7635012094158e-06	Ppia/Hsp90ab1/Hsp90b1/Rock1/Rock2/Ppp1r2/Calm1/Arpp19/Ywhae/Bod1l/Camta1/Ppp1r12a/Calm2/Pin1/Calm3/Gnai2/Ppp2ca/Mprip/Ensa	19
GO:1900180	GO:1900180	regulation of protein localization to nucleus	25/1569	151/28814	6.3971526390986e-07	9.58664209410372e-06	6.93088636706167e-06	Npm1/Tpr/Hsp90ab1/Ran/Cd2ap/Park7/Sumo1/Lamtor5/Pin1/Nmd3/Cdk1/Larp7/Pkig/Parp1/Ubr5/Maged1/Ctnna1/Tardbp/Ppp2ca/Trim28/Nup54/Sirt1/App/Hnrnpm/Ufm1	25
GO:0008631	GO:0008631	intrinsic apoptotic signaling pathway in response to oxidative stress	13/1569	46/28814	6.62000601360553e-07	9.8921065971044e-06	7.15172904989958e-06	Ppia/Sod1/Sfpq/Park7/Stk25/Sod2/Pdcd10/Fbxw7/Rnf7/Parp1/P4hb/Hif1a/Sirt1	13
GO:0042026	GO:0042026	protein refolding	9/1569	21/28814	6.6572470937859e-07	9.8921065971044e-06	7.15172904989958e-06	Hspa8/Hsp90aa1/Dnaja1/Hspa5/Dnaja2/Hspd1/Hspa9/Hspa2/St13	9
GO:0045116	GO:0045116	protein neddylation	9/1569	21/28814	6.6572470937859e-07	9.8921065971044e-06	7.15172904989958e-06	Rbx1/Nedd8/Nae1/Dcun1d5/Ube2m/Cops9/Rnf7/Ube2f/Hif1a	9
GO:0006914	GO:0006914	autophagy	52/1569	464/28814	7.30029106695791e-07	1.07868446437543e-05	7.79860077711588e-06	Hspa8/Hmgb1/Tomm7/Rock1/Eif4g2/Mtdh/Park7/Huwe1/Rb1cc1/Vcp/Emc6/Herc1/Pik3c2a/Tmem59/Sh3glb1/Vps4b/Atp2a2/Ptk2/Fnbp1l/Vps13a/Cltc/Fbxw7/Pikfyve/Gnai3/Trappc4/Map1lc3b/Ift88/Pafah1b2/Gabarapl2/Ift20/Chmp4b/Sptlc2/Hif1a/Vti1b/Bnip3l/Nsfl1c/Tmbim6/Phb2/Scoc/Cisd2/Ubxn2a/Trappc8/Stx12/Sirt1/Eif4g1/Ufm1/Lamp2/Atpif1/Rab1a/Becn1/Stub1/Sec22b	52
GO:0061919	GO:0061919	process utilizing autophagic mechanism	52/1569	464/28814	7.30029106695791e-07	1.07868446437543e-05	7.79860077711588e-06	Hspa8/Hmgb1/Tomm7/Rock1/Eif4g2/Mtdh/Park7/Huwe1/Rb1cc1/Vcp/Emc6/Herc1/Pik3c2a/Tmem59/Sh3glb1/Vps4b/Atp2a2/Ptk2/Fnbp1l/Vps13a/Cltc/Fbxw7/Pikfyve/Gnai3/Trappc4/Map1lc3b/Ift88/Pafah1b2/Gabarapl2/Ift20/Chmp4b/Sptlc2/Hif1a/Vti1b/Bnip3l/Nsfl1c/Tmbim6/Phb2/Scoc/Cisd2/Ubxn2a/Trappc8/Stx12/Sirt1/Eif4g1/Ufm1/Lamp2/Atpif1/Rab1a/Becn1/Stub1/Sec22b	52
GO:0031060	GO:0031060	regulation of histone methylation	19/1569	95/28814	7.38713640276113e-07	1.08846772414986e-05	7.86933113413807e-06	Smarca5/Rif1/Kdm1a/Iws1/Nsd1/Jarid2/Kmt2a/Baz2a/Prdm9/Rnf20/Auts2/Kmt2e/Ctnnb1/Kdm3a/Ctr9/Chtop/Nelfe/Phf20/Sirt1	19
GO:0006346	GO:0006346	DNA methylation-dependent heterochromatin assembly	10/1569	27/28814	8.00383113004658e-07	1.16953488119102e-05	8.45542504276389e-06	Hells/Mphosph8/Kcnq1ot1/Kdm1a/Setdb1/Pphln1/Hdac1/Smarca4/Atf7ip2/Trim28	10
GO:0007064	GO:0007064	mitotic sister chromatid cohesion	10/1569	27/28814	8.00383113004658e-07	1.16953488119102e-05	8.45542504276389e-06	Smc1b/Smc3/Nipbl/Naa50/Smc5/Cdc20/Slf1/Pds5a/Pds5b/Slf2	10
GO:0070199	GO:0070199	establishment of protein localization to chromosome	10/1569	27/28814	8.00383113004658e-07	1.16953488119102e-05	8.45542504276389e-06	Cct3/Brca2/Cct8/Cct2/Nipbl/Cct4/Cct6a/Tcp1/Cct7/Cct5	10
GO:0044403	GO:0044403	biological process involved in symbiotic interaction	36/1569	272/28814	8.10111911615624e-07	1.17739156036888e-05	8.5122267362763e-06	Hspa8/Hsp90ab1/Fmr1/Cfl1/Vapa/Bsg/Alyref/Tcp1/Hspd1/Ythdc2/Snx3/Hdac1/Rad50/Ctsl/Romo1/Thoc2/Vps4b/Smarca4/Nucks1/Tsg101/Thoc7/Ddx39b/Eps15/Pikfyve/Ppib/Rrp1b/Chmp4b/Dynlt1b/P4hb/Thoc1/Taf11/Tardbp/Thoc3/Psmc3/Ddb1/Ep300	36
GO:0048545	GO:0048545	response to steroid hormone	32/1569	227/28814	8.10223955287022e-07	1.17739156036888e-05	8.5122267362763e-06	Calr/Ddx5/Hmgb1/Hnrnpu/Dnaja1/Ptges3/Hmgb2/Park7/Rwdd1/Uri1/Ube2l3/Eif4e/Hdac1/Ube3a/Smarca4/Taf7/Rhoa/Strn3/Tmf1/Ddx17/Pak1/Parp1/Safb/Ubr5/Pdcd7/Kdm3a/Nedd4/Phb2/Ncor1/Ep300/Sirt1/Ufm1	32
GO:0006123	GO:0006123	mitochondrial electron transport, cytochrome c to oxygen	7/1569	12/28814	8.70908856739736e-07	1.26210006024783e-05	9.12464658174686e-06	Cox7c/Cox5b/Cox5a/Cox4i1/Cox6a1/Cycs/Cyct	7
GO:0009755	GO:0009755	hormone-mediated signaling pathway	26/1569	164/28814	9.09602009744264e-07	1.31456180860301e-05	9.50393102034166e-06	Calr/Ddx5/Dnaja1/Ptges3/Park7/Rwdd1/Hdac1/Ube3a/Smarca4/Taf7/Rhoa/Strn3/Tmf1/Ddx17/Pak1/Parp1/Safb/Appl1/Ubr5/Kdm3a/Nedd4/Phb2/Ncor1/Ep300/Sirt1/Ufm1	26
GO:0051302	GO:0051302	regulation of cell division	29/1569	196/28814	9.59522531643552e-07	1.38291840284692e-05	9.99813095238593e-06	Brca2/Ybx1/Cdc42/Ccp110/Calm1/Cul3/Pkn2/Prpf40a/Kif23/Orc6/Mdk/Calm2/Sh3glb1/Pin1/Calm3/Rhoa/Spast/Sgf29/Prc1/Kif20b/Birc6/Tex14/Rab11a/Dr1/Cspp1/Apc/Plk4/Setd2/Becn1	29
GO:0009150	GO:0009150	purine ribonucleotide metabolic process	42/1569	345/28814	9.94542098289815e-07	1.42948489604326e-05	1.03347942696228e-05	Atp5g2/Hint1/Atp5j/Atp5e/Ran/Atp5l/Atp5b/Atp5h/Mpc2/Atp5j2/Nme2/Atp5g1/Atp5d/Ndufc2/Mpc1/Vcp/Impdh2/Atp5a1/Atp5o/Atp5g3/Adss/Atp5c1/Rhoa/Mtch2/Gnai3/Parp1/Dld/Gmps/Pkm/Pdk3/Hif1a/Nme1/Far1/Adk/Ncor1/Atp5k/Zbtb20/Ep300/Suclg1/App/Ak2/Hprt	42
GO:2000573	GO:2000573	positive regulation of DNA biosynthetic process	17/1569	80/28814	1.14978937521943e-06	1.64813558540285e-05	1.19155803959382e-05	Npm1/Hsp90ab1/Hsp90aa1/Cct3/Cct8/Ptges3/Cct2/Cct4/Atr/Cct6a/Tcp1/Rfc4/Pcna/Cct7/Cct5/Ddx39b/Ctnnb1	17
GO:0007141	GO:0007141	male meiosis I	10/1569	28/28814	1.18422293342837e-06	1.68376710885032e-05	1.21731868004284e-05	Brca2/Slc25a31/Meioc/Dmc1/Ddx4/Brdt/Hspa2/Mov10l1/Meiob/Mybl1	10
GO:0031440	GO:0031440	regulation of mRNA 3'-end processing	10/1569	28/28814	1.18422293342837e-06	1.68376710885032e-05	1.21731868004284e-05	Ythdc1/Papola/Nudt21/Zc3h14/Dhx36/Rnf20/Ctr9/Nelfe/Ahcyl1/Cdc73	10
GO:1902175	GO:1902175	regulation of oxidative stress-induced intrinsic apoptotic signaling pathway	10/1569	28/28814	1.18422293342837e-06	1.68376710885032e-05	1.21731868004284e-05	Ppia/Sod1/Sfpq/Park7/Sod2/Fbxw7/Parp1/P4hb/Hif1a/Sirt1	10
GO:0043467	GO:0043467	regulation of generation of precursor metabolites and energy	24/1569	147/28814	1.37759145072065e-06	1.95343948993318e-05	1.41228461402403e-05	Ndufa4/Hmgb1/Cox7a2/Uqcc2/Park7/Cox7a2l/Chchd2/Cox17/Cisd1/Vcp/Cycs/Dnajc15/Rhoa/Cdk1/Slc25a33/Mtch2/Ppp1cb/Ppp1ca/Hif1a/Phb2/Ncor1/Zbtb20/Ep300/App	24
GO:0044843	GO:0044843	cell cycle G1/S phase transition	32/1569	233/28814	1.44748238267954e-06	2.04704277979479e-05	1.47995729432707e-05	Nasp/Anp32b/Cirbp/Rbbp8/Spdya/Usp26/Eif4e/Senp2/Ezh2/Ankrd17/Brd7/Gigyf2/Usp37/E2f5/Taf10/Cul4b/Kmt2e/Larp7/Appl1/Dbf4/Npat/Ccne2/Mlf1/Phb2/Ppp2ca/Apc/Mdm2/Ccnh/Rdx/Pole/Eif4g1/Cdc73	32
GO:0008608	GO:0008608	attachment of spindle microtubules to kinetochore	11/1569	35/28814	1.49378671131681e-06	2.10687831609524e-05	1.52321679006496e-05	Brca2/Hnrnpu/Cdc42/Knl1/Cenpe/Eml4/Tex14/Apc/Zfp207/Becn1/Spc25	11
GO:0051100	GO:0051100	negative regulation of binding	26/1569	169/28814	1.63079961871639e-06	2.29399146366106e-05	1.65849460171494e-05	Rack1/Actb/Rock1/Ppp1r2/Kdm1a/1810037I17Rik/Park7/Sumo1/Hnrnpk/Wapl/Hspa4/Senp2/Pin1/Atp2a2/Lrpap1/Fbxw7/Larp7/Btaf1/Gtpbp4/Tmbim6/Tex14/Hdac2/Gtf2f1/Sirt1/Adnp/Stub1	26
GO:0009259	GO:0009259	ribonucleotide metabolic process	43/1569	364/28814	1.6589566028811e-06	2.3273925745207e-05	1.68264271339256e-05	Atp5g2/Hint1/Atp5j/Atp5e/Ran/Atp5l/Atp5b/Atp5h/Mpc2/Atp5j2/Nme2/Atp5g1/Atp5d/Ndufc2/Mpc1/Vcp/Impdh2/Atp5a1/Atp5o/Atp5g3/Adss/Atp5c1/Rhoa/Mtch2/Gnai3/Parp1/Cmpk1/Dld/Gmps/Pkm/Pdk3/Hif1a/Nme1/Far1/Adk/Ncor1/Atp5k/Zbtb20/Ep300/Suclg1/App/Ak2/Hprt	43
GO:2000278	GO:2000278	regulation of DNA biosynthetic process	22/1569	129/28814	1.77356241991882e-06	2.48157606500578e-05	1.79411326186399e-05	Npm1/Hsp90ab1/Hsp90aa1/Cct3/Hnrnpa2b1/Hnrnpu/Cct8/Ptges3/Cct2/Cct4/Atr/Cct6a/Tcp1/Rfc4/Pcna/Dnajc2/Cct7/Cct5/Ddx39b/Hnrnpd/Ctnnb1/Jade3	22
GO:0046831	GO:0046831	regulation of RNA export from nucleus	7/1569	13/28814	1.79778816527415e-06	2.50881814069342e-05	1.81380855549659e-05	Tpr/Iws1/Khdrbs1/Thoc2/Nup153/Akap8l/Setd2	7
GO:0048524	GO:0048524	positive regulation of viral process	14/1569	58/28814	2.01090206423195e-06	2.7914495760062e-05	2.01814353980952e-05	Ppia/Fmr1/Top2a/Fkbp6/Bsg/Pkn2/Top2b/Tsg101/Pfn1/Adarb1/Srpk1/P4hb/Ddb1/Kpna2	14
GO:1904356	GO:1904356	regulation of telomere maintenance via telomere lengthening	14/1569	58/28814	2.01090206423195e-06	2.7914495760062e-05	2.01814353980952e-05	Cct3/Hnrnpa2b1/Hnrnpu/Cct8/Cct2/Cct4/Atr/Cct6a/Tcp1/Dhx36/Cct7/Cct5/Ctnnb1/Parp1	14
GO:0034243	GO:0034243	regulation of transcription elongation from RNA polymerase II promoter	12/1569	43/28814	2.06416031076879e-06	2.85785974784918e-05	2.06615632156799e-05	Hnrnpu/Eloc/Supt16/Cdk12/Ezh2/Supt4a/Cdk13/Ctnnb1/Eapp/Nelfe/Gtf2f1/Cdc73	12
GO:0072521	GO:0072521	purine-containing compound metabolic process	45/1569	392/28814	2.09671176206743e-06	2.89532841489678e-05	2.09324516780664e-05	Atp5g2/Hint1/Atp5j/Atp5e/Ran/Atp5l/Atp5b/Atp5h/Mpc2/Atp5j2/Nme2/Atp5g1/Atp5d/Ndufc2/Mpc1/Vcp/Impdh2/Atp5a1/Atp5o/Atp5g3/Adss/Atp5c1/Rhoa/Mtch2/Gnai3/Parp1/Macrod2/Dld/Gmps/Pkm/Pdk3/Hif1a/Nme1/Far1/Adk/Ncor1/Atp5k/Zbtb20/Ep300/Suclg1/App/Ak2/Pcmt1/Oga/Hprt	45
GO:0031503	GO:0031503	protein-containing complex localization	29/1569	204/28814	2.19833356571124e-06	3.02773095538559e-05	2.18896867076318e-05	Npm1/Dynll1/H3f3a/Hnrnpu/Ran/Hspb11/Sfpq/Ift74/Pcm1/Nup88/Cep112/Vps35/Ift81/Kif5b/Akap9/Nmd3/Rpgr/Pura/Ift88/Xpo1/Ssna1/Ap2m1/Ltv1/Ift20/Exoc3/Nedd4/Rab11a/Sdad1/Synj2bp	29
GO:0010611	GO:0010611	regulation of cardiac muscle hypertrophy	16/1569	75/28814	2.23356814567243e-06	3.06824790844325e-05	2.21826134642852e-05	Rock1/Rock2/Tomm70a/Jarid2/Pin1/Ptk2/Mtpn/Ddx39b/Pak1/Yy1/Parp1/Glrx3/Mef2a/Adk/Sirt1/Becn1	16
GO:0043502	GO:0043502	regulation of muscle adaptation	19/1569	102/28814	2.28431898037858e-06	3.1298136679213e-05	2.26277174734425e-05	Rock1/Rock2/Tomm70a/Jarid2/Pin1/Atp2a2/Ptk2/Mtpn/Ddx39b/Ndufs4/Pak1/Yy1/Parp1/Glrx3/Mef2a/Adk/Sirt1/Becn1/Oga	19
GO:0030433	GO:0030433	ubiquitin-dependent ERAD pathway	17/1569	84/28814	2.35397373521196e-06	3.21689415887126e-05	2.32572861812733e-05	Calr/Hsp90b1/Hspa5/Ubxn4/Sec61b/Erlec1/Vcp/Psmc6/Ube2j2/Dnajc10/Canx/Usp19/Faf2/Faf1/Clgn/Stub1/Bcap31	17
GO:0006163	GO:0006163	purine nucleotide metabolic process	43/1569	369/28814	2.37311386997742e-06	3.2346707142457e-05	2.33858059320772e-05	Atp5g2/Hint1/Atp5j/Atp5e/Ran/Atp5l/Atp5b/Atp5h/Mpc2/Atp5j2/Nme2/Atp5g1/Atp5d/Ndufc2/Mpc1/Vcp/Impdh2/Atp5a1/Atp5o/Atp5g3/Adss/Atp5c1/Rhoa/Mtch2/Gnai3/Parp1/Dld/Gmps/Pkm/Pdk3/Hif1a/Nme1/Far1/Adk/Ncor1/Atp5k/Zbtb20/Ep300/Suclg1/App/Ak2/Oga/Hprt	43
GO:0007289	GO:0007289	spermatid nucleus differentiation	10/1569	30/28814	2.45301412895434e-06	3.32638805404476e-05	2.40488978195145e-05	Sycp1/1700013H16Rik/Sycp3/Hmgb2/Selenof/Tmf1/Ift88/Kdm3a/Xlr/Agfg1	10
GO:0034508	GO:0034508	centromere complex assembly	10/1569	30/28814	2.45301412895434e-06	3.32638805404476e-05	2.40488978195145e-05	H3f3b/Nasp/H3f3a/Hells/Cenpw/Senp6/Rnf4/Cenpe/Cenpp/Cenpk	10
GO:0016197	GO:0016197	endosomal transport	31/1569	228/28814	2.60051090889174e-06	3.51735770369332e-05	2.5429557416774e-05	Cdc42/Rab14/Vps29/Snx3/Vcp/Vamp3/Vps35/Rab6a/Vps4b/Itsn2/Gbf1/Rab10/Cltc/Eps15/Pikfyve/Alms1/Spag9/Zfyve16/Chmp4b/Vti1b/Usp7/Gcc2/Zfyve9/Snx27/Rab11a/Snf8/Evi5/Commd1/Stx12/Ap1s2/Arl1	31
GO:0034599	GO:0034599	cellular response to oxidative stress	35/1569	274/28814	2.60919225534642e-06	3.5200739506272e-05	2.54491951571412e-05	Ppia/Rack1/Prdx1/Cfl1/Sod1/Eif2s1/Sfpq/Park7/Rwdd1/Chchd2/Stk25/Sod2/Pdcd10/Ezh2/Romo1/Atp2a2/Chd6/Akr1b3/Atf2/Fbxw7/Rnf7/Ctnnb1/Parp1/P4hb/Hif1a/Mapkap1/Prdx5/Hdac2/Chuk/Setx/Sirt1/Pnpla8/App/Dhfr/Fut8	35
GO:0000082	GO:0000082	G1/S transition of mitotic cell cycle	29/1569	206/28814	2.68248296032529e-06	3.60971877951937e-05	2.60973033438736e-05	Nasp/Anp32b/Rbbp8/Spdya/Usp26/Eif4e/Senp2/Ezh2/Ankrd17/Brd7/Gigyf2/Usp37/E2f5/Taf10/Cul4b/Kmt2e/Larp7/Appl1/Dbf4/Npat/Ccne2/Ppp2ca/Apc/Mdm2/Ccnh/Rdx/Pole/Eif4g1/Cdc73	29
GO:0021543	GO:0021543	pallium development	25/1569	163/28814	2.7169872776318e-06	3.64684679122335e-05	2.63657289590465e-05	Pafah1b1/Hnrnpk/Ywhae/Usp9x/Uba6/Rtn4/Hdac1/Mdk/Pex13/Uqcrq/Rhoa/Rac1/Rnf7/Srgap2/Ctnnb1/Cul5/Kif3a/Celf1/Hif1a/Afdn/Nars/Hdac2/Lrp6/Tra2b/Tacc1	25
GO:0090307	GO:0090307	mitotic spindle assembly	15/1569	68/28814	2.95932260492337e-06	3.96203724390121e-05	2.86444718077407e-05	Smc3/Tpr/Hnrnpu/Stag1/Kif23/Tpx2/Kif2a/Vps4b/Rhoa/Cltc/Prc1/Cdc20/Chmp4b/Rab11a/Zfp207	15
GO:0051131	GO:0051131	chaperone-mediated protein complex assembly	8/1569	19/28814	3.3430079168945e-06	4.46439664851101e-05	3.22763962236077e-05	Hsp90ab1/Hsp90aa1/Ptges3/Cct2/Hspa4/Pfdn6/Psmg1/Stub1	8
GO:0051123	GO:0051123	RNA polymerase II preinitiation complex assembly	10/1569	31/28814	3.44447878996131e-06	4.58828929723382e-05	3.31721070069905e-05	Taf7l/Hmgb1/Gtf2a2/Psmc6/Taf7/Taf10/Taf1/Taf11/Dr1/Gtf2b	10
GO:0006890	GO:0006890	retrograde vesicle-mediated transport, Golgi to endoplasmic reticulum	12/1569	45/28814	3.4973152513121e-06	4.64693651150411e-05	3.3596110713254e-05	Arf4/Copb2/Rab6a/Lman2/Gbf1/Arf5/Arcn1/Kdelr2/Ergic2/Copa/Ergic3/Sec22b	12
GO:0030522	GO:0030522	intracellular receptor signaling pathway	30/1569	220/28814	3.52735590578084e-06	4.67507598065174e-05	3.37995515647818e-05	Calr/Ddx5/Dnaja1/Ptges3/Park7/Rwdd1/Rnf34/Hdac1/Ube3a/Ezh2/Ankrd17/Usp15/Smarca4/Taf7/Rhoa/Strn3/Tmf1/Ddx17/Pak1/Parp1/Safb/Ubr5/Kdm3a/Pdk3/Nedd4/Phb2/Ncor1/Ep300/Sirt1/Ufm1	30
GO:0030307	GO:0030307	positive regulation of cell growth	29/1569	209/28814	3.59458785088511e-06	4.75224333669649e-05	3.43574509530584e-05	H3f3b/H3f3a/Pafah1b1/Eif4g2/Cfl1/Cdc42/Atp5g1/Hnrnpk/Golga4/Rtn4/Usp47/Csnk2a1/Sh3glb1/Pin1/Macf1/Hdgfl2/Itsn2/Ptk2/Rhoa/Slc25a33/Mtpn/Ddx39b/Pak1/Afdn/Rab11a/Kdm2b/Sirt1/Adnp/Eif4g1	29
GO:0007033	GO:0007033	vacuole organization	27/1569	187/28814	3.60434622517097e-06	4.75323158444422e-05	3.43645957205116e-05	Hspa8/Atp6v0c/Hook1/Rab14/Rb1cc1/Emc6/Arf1/Pik3c2a/Sh3glb1/Vps35/Atp2a2/Atf2/Pikfyve/Map1lc3b/Ift88/Gabarapl2/Ift20/Chmp4b/Tmem199/Nsfl1c/Ubxn2a/Trappc8/Stx12/Ccdc115/Rab1a/Becn1/Sec22b	27
GO:0072659	GO:0072659	protein localization to plasma membrane	37/1569	302/28814	3.69441166325317e-06	4.84817816658328e-05	3.50510341681841e-05	Rack1/Actb/Rock1/Rock2/Bsg/Tmed2/Golga4/Ccdc88a/Rapgef6/Csnk2a1/Vamp3/Efr3a/Tmem59/Hectd1/Vps35/Macf1/Kif5b/Rab10/Fcho2/Rac1/Cltc/Atp1b3/Slmap/Appl1/Pgrmc1/Ap2m1/Ift20/Pip5k1a/Vti1b/Afdn/Snx27/Rab11a/Rdx/Commd1/Lrp6/Rab11fip2/Bag4	37
GO:0006458	GO:0006458	'de novo' protein folding	11/1569	38/28814	3.70391621067879e-06	4.84817816658328e-05	3.50510341681841e-05	Hspa8/Hspa5/Ptges3/Cct2/Hspe1/Dnajc2/Hspa9/Sh3glb1/Selenof/Hspa2/St13	11
GO:1905168	GO:1905168	positive regulation of double-strand break repair via homologous recombination	11/1569	38/28814	3.70391621067879e-06	4.84817816658328e-05	3.50510341681841e-05	Actb/Fus/Rbbp8/Morf4l1/Mrgbp/Ep400/Hdgfl2/Mbtd1/Parp1/Morf4l2/Ruvbl1	11
GO:1902903	GO:1902903	regulation of supramolecular fiber organization	44/1569	388/28814	3.73185727940338e-06	4.87266018535962e-05	3.5228032629699e-05	Mphosph8/Hspa8/Actg1/Stmn1/Rock2/Ckap5/Cfl1/Cdc42/Arpc1a/Pfdn2/Pfdn5/Ccdc88a/Arpc2/Rasa1/Taok1/Brk1/Hdgfl3/Sptan1/Arf1/Tpx2/Arpc5l/Pfdn4/Pak2/Akap9/Pfn1/Cfl2/Rhoa/Rac1/Mtpn/Mapre1/Pak1/Capza2/Alms1/Add3/Pfdn6/Eml4/Tmsb15b2/Hdac2/Apc/Tjp1/Rdx/App/Tmsb4x/Bag4	44
GO:1905820	GO:1905820	positive regulation of chromosome separation	9/1569	25/28814	3.79422714324523e-06	4.94186374830088e-05	3.57283559193696e-05	Smc4/Cul3/Anapc5/Ncapg2/Cenpe/Ncapg/Smc2/Ncapd3/Anapc11	9
GO:2000142	GO:2000142	regulation of DNA-templated transcription, initiation	14/1569	61/28814	3.82851884147606e-06	4.95314849853641e-05	3.58099416516785e-05	Sub1/Hmgb1/Gtf2a2/Dhx36/Bclaf1/Psmc6/Med13/Taf4b/Taf7/Zfp451/Taf10/Taf11/Setx/Med4	14
GO:0007339	GO:0007339	binding of sperm to zona pellucida	13/1569	53/28814	3.8313461134462e-06	4.95314849853641e-05	3.58099416516785e-05	Tex101/Ly6k/Ubap2l/Cct3/Cct8/Cct2/Cct4/Cct6a/Tcp1/Vdac2/Cct7/Cct5/Clgn	13
GO:0031057	GO:0031057	negative regulation of histone modification	13/1569	53/28814	3.8313461134462e-06	4.95314849853641e-05	3.58099416516785e-05	Kdm5a/Ube2b/Kdm1a/Ppp4r2/Trip12/Jarid2/Ppp4r3b/Taf7/Zfp451/Ubr5/Kdm3a/Sirt1/Ppp4c	13
GO:0006334	GO:0006334	nucleosome assembly	16/1569	78/28814	3.84984053914678e-06	4.95314849853641e-05	3.58099416516785e-05	Npm1/H3f3b/Nasp/H3f3a/Smarca5/Anp32b/Nap1l1/Set/Brd2/Smarca4/Cenpp/Nap1l4/Dnajc9/Asf1b/Pole3/Shprh	16
GO:0014743	GO:0014743	regulation of muscle hypertrophy	16/1569	78/28814	3.84984053914678e-06	4.95314849853641e-05	3.58099416516785e-05	Rock1/Rock2/Tomm70a/Jarid2/Pin1/Ptk2/Mtpn/Ddx39b/Pak1/Yy1/Parp1/Glrx3/Mef2a/Adk/Sirt1/Becn1	16
GO:0019693	GO:0019693	ribose phosphate metabolic process	43/1569	376/28814	3.85973706570559e-06	4.95379878870973e-05	3.58146430760696e-05	Atp5g2/Hint1/Atp5j/Atp5e/Ran/Atp5l/Atp5b/Atp5h/Mpc2/Atp5j2/Nme2/Atp5g1/Atp5d/Ndufc2/Mpc1/Vcp/Impdh2/Atp5a1/Atp5o/Atp5g3/Adss/Atp5c1/Rhoa/Mtch2/Gnai3/Parp1/Cmpk1/Dld/Gmps/Pkm/Pdk3/Hif1a/Nme1/Far1/Adk/Ncor1/Atp5k/Zbtb20/Ep300/Suclg1/App/Ak2/Hprt	43
GO:0051881	GO:0051881	regulation of mitochondrial membrane potential	17/1569	87/28814	3.90401628034365e-06	4.99846744631377e-05	3.61375855485055e-05	Rack1/Sod1/Gclm/Park7/Atp5g1/Ndufc2/Sod2/Vcp/Slc25a33/Mtch2/Ndufs4/Parp1/Bnip3l/Gclc/Ndufs1/Atpif1/Oga	17
GO:0098727	GO:0098727	maintenance of cell number	26/1569	177/28814	3.92962799600153e-06	5.01907691983246e-05	3.62865865413879e-05	Tpt1/Smc3/Med21/Rif1/Tut4/Nipbl/Zfp706/Med10/Zc3h13/Pcm1/Eif4e/Med7/Ddx6/Smc5/Ezh2/Smarca4/Eif4enif1/Med28/Kdm3a/Ctr9/Gnl3/Apc/Kdm2b/Med6/Jmjd1c/Cdc73	26
GO:0016236	GO:0016236	macroautophagy	32/1569	245/28814	4.29995481479399e-06	5.47880716136191e-05	3.96103134858851e-05	Tomm7/Huwe1/Rb1cc1/Vcp/Emc6/Pik3c2a/Sh3glb1/Atp2a2/Pikfyve/Gnai3/Map1lc3b/Ift88/Pafah1b2/Gabarapl2/Ift20/Chmp4b/Sptlc2/Hif1a/Vti1b/Bnip3l/Nsfl1c/Phb2/Scoc/Ubxn2a/Trappc8/Stx12/Sirt1/Ufm1/Lamp2/Rab1a/Becn1/Sec22b	32
GO:0046784	GO:0046784	viral mRNA export from host cell nucleus	6/1569	10/28814	4.4854374855745e-06	5.70136933407361e-05	4.12193785928634e-05	Alyref/Thoc2/Thoc7/Ddx39b/Thoc1/Thoc3	6
GO:2001235	GO:2001235	positive regulation of apoptotic signaling pathway	24/1569	157/28814	4.52755660548307e-06	5.74107237834692e-05	4.15064210062378e-05	Rack1/Bub1/Sod1/Sfpq/Park7/Pdia3/Bclaf1/Cyld/Sh3glb1/Pak2/Inca1/Fbxw7/Cyct/Mtch2/Ptpn2/Pdcd7/Ppp1ca/Maged1/Ctnna1/Faf1/Sirt1/Serinc3/Becn1/Bcap31	24
GO:0042770	GO:0042770	signal transduction in response to DNA damage	25/1569	168/28814	4.72979867267032e-06	5.98313860871365e-05	4.32564952444391e-05	Npm1/Ddx5/Brca2/Tipin/Kdm1a/Atr/Mif/Topbp1/Atad5/Nek1/Taok1/Rad17/Cdc5l/Senp2/Cdk1/Gigyf2/Atf2/Ddx39b/Pttg1ip/Dtl/Clspn/Cops3/Thoc1/Mdm2/Sirt1	25
GO:1903364	GO:1903364	positive regulation of cellular protein catabolic process	23/1569	147/28814	4.76656677298325e-06	6.01522481518819e-05	4.34884699534584e-05	Rack1/Sumo2/Hsp90aa1/Fmr1/Rbx1/Sumo1/Vcp/Fbxl5/Vps35/Ptk2/Ube2v2/Fbxw7/Pttg1ip/Cdc20/Gclc/Mdm2/Rdx/Faf1/Cop1/Arih1/Atpif1/Stub1/Bcap31	23
GO:0031346	GO:0031346	positive regulation of cell projection organization	48/1569	443/28814	4.89243349619704e-06	6.15932856621465e-05	4.4530301612164e-05	Dynll1/Eef1a1/Pafah1b1/Fmr1/Cfl1/Hspa5/Nme2/Cdc42/Ccp110/Qk/Atp5g1/Hnrnpk/Caprin2/Golga4/Dhx36/Stk25/Snx3/Ccdc88a/Ranbp1/Arpc2/Rtn4/Caprin1/Brk1/Rala/Ezh2/Mdk/Sh3glb1/Macf1/Fnbp1l/Pfn1/Ube2v2/Rac1/Auts2/Pak1/Atf1/Dynlt1b/Akirin1/Cux1/Nme1/Afdn/Rab11a/Tmem30a/Apc/Setx/Ep300/Sirt1/Lrp6/Adnp	48
GO:0042273	GO:0042273	ribosomal large subunit biogenesis	15/1569	71/28814	5.23134606480937e-06	6.55471508120414e-05	4.73888405870842e-05	Npm1/Snu13/Mrpl20/Rsl1d1/Ebna1bp2/Pak1ip1/Malsu1/Brix1/Nsa2/Ddx18/Gtpbp4/Sdad1/Mdn1/Mrto4/Las1l	15
GO:2001244	GO:2001244	positive regulation of intrinsic apoptotic signaling pathway	15/1569	71/28814	5.23134606480937e-06	6.55471508120414e-05	4.73888405870842e-05	Rack1/Bub1/Sod1/Sfpq/Park7/Bclaf1/Sh3glb1/Fbxw7/Cyct/Mtch2/Ptpn2/Sirt1/Serinc3/Becn1/Bcap31	15
GO:0007063	GO:0007063	regulation of sister chromatid cohesion	8/1569	20/28814	5.30515186937966e-06	6.63143983672458e-05	4.79435400917e-05	Bub1/Sfpq/Wapl/Smc5/Ctnnb1/Slf1/Sgo2a/Slf2	8
GO:0034644	GO:0034644	cellular response to UV	17/1569	89/28814	5.39474250385744e-06	6.72748621934941e-05	4.86379298033483e-05	Npm1/Fmr1/Eif2s1/Kdm1a/Atr/Pcna/Dhx36/Usp47/Cops9/Fbxw7/Cul4b/Yy1/Parp1/Nedd4/Ddb1/Ep300/Sirt1	17
GO:0034605	GO:0034605	cellular response to heat	13/1569	55/28814	5.96872027187409e-06	7.42570741371128e-05	5.36858826837136e-05	Tpr/Hsp90ab1/Hsp90aa1/Eif2s1/Sumo1/Ywhae/Dhx36/Vcp/Rbbp7/Hikeshi/Chordc1/Hsbp1/Stub1	13
GO:1990778	GO:1990778	protein localization to cell periphery	42/1569	370/28814	5.99511503337688e-06	7.44099571789719e-05	5.37964130425373e-05	Rack1/Actb/Rock1/Rock2/Bsg/Tmed2/Golga4/Ccdc88a/Rapgef6/Csnk2a1/Vamp3/Epb41l2/Efr3a/Tmem59/Hectd1/Vps35/Lztfl1/Macf1/Kif1b/Kif5b/Rab10/Fcho2/Rac1/Cltc/Atp1b3/Slmap/Appl1/Rabep1/Pgrmc1/Arl13b/Ap2m1/Ift20/Pip5k1a/Vti1b/Afdn/Snx27/Rab11a/Rdx/Commd1/Lrp6/Rab11fip2/Bag4	42
GO:0009411	GO:0009411	response to UV	23/1569	149/28814	6.01208586507982e-06	7.44454294326198e-05	5.38220585351722e-05	Npm1/Brca2/Fmr1/Tipin/Cirbp/Ube2b/Eif2s1/Kdm1a/Atr/Pcna/Dhx36/Usp47/Cops9/Fbxw7/Cul4b/Dtl/Yy1/Parp1/Rad18/Nedd4/Ddb1/Ep300/Sirt1	23
GO:0007076	GO:0007076	mitotic chromosome condensation	7/1569	15/28814	6.12024650778398e-06	7.56072607226241e-05	5.4662031548629e-05	Smarca5/Smc4/Ncapg/Akap8l/Baz1b/Smc2/Ncapd3	7
GO:0009416	GO:0009416	response to light stimulus	38/1569	321/28814	6.20674293365052e-06	7.64966564836601e-05	5.53050409459317e-05	Npm1/Brca2/Fmr1/Tipin/Cirbp/Ckap5/Kras/Ube2b/Eif2s1/Kdm1a/Atr/Pcna/Gnb1/Dhx36/Usp47/Kmt2a/Cops9/Fbxw7/Cul4b/Rpgr/Dtl/Dynlrb1/Yy1/Pde6d/Parp1/Rad18/Ift20/Ppp1cb/Ppp1ca/Hif1a/Nedd4/Ddb1/Ep300/Sirt1/Ddhd2/App/Rbp4/Ap1s2	38
GO:0032212	GO:0032212	positive regulation of telomere maintenance via telomerase	10/1569	33/28814	6.50475087956633e-06	7.99181186159998e-05	5.77786667489683e-05	Cct3/Cct8/Cct2/Cct4/Atr/Cct6a/Tcp1/Cct7/Cct5/Ctnnb1	10
GO:0050792	GO:0050792	regulation of viral process	25/1569	171/28814	6.51465232319999e-06	7.99181186159998e-05	5.77786667489683e-05	Ppia/Ddx5/Mphosph8/Fmr1/Top2a/Fkbp6/Bsg/Setdb1/Pkn2/Banf1/Top2b/Snx3/Rad50/Tsg101/Pfn1/Adarb1/Larp7/Ilf3/Srpk1/Dynlt1b/P4hb/Trim28/Ddb1/Snf8/Kpna2	25
GO:0051310	GO:0051310	metaphase plate congression	14/1569	64/28814	6.98182681939474e-06	8.54504326503648e-05	6.17783821386424e-05	Cenpf/Brca2/Hnrnpu/Meioc/Nudc/Cul3/Cdca8/Cenpe/Vps4b/Chmp4b/Dync1h1/Eml4/Rab11a/Becn1	14
GO:0070507	GO:0070507	regulation of microtubule cytoskeleton organization	24/1569	161/28814	7.05261647964744e-06	8.61170183568061e-05	6.22603058132619e-05	Tpr/Pafah1b1/Rock1/Stmn1/Hnrnpu/Ckap5/Senp6/Rae1/Taok1/Hdgfl3/Rnf4/Tpx2/Cyld/Vps4b/Akap9/Rhoa/Rac1/Mapre1/Cltc/Pak1/Chmp4b/Dync1h1/Eml4/Apc	24
GO:1900407	GO:1900407	regulation of cellular response to oxidative stress	17/1569	91/28814	7.3772935939882e-06	8.97990899607633e-05	6.49223453086247e-05	Ppia/Rack1/Sod1/Sfpq/Park7/Sod2/Fbxw7/Ctnnb1/Parp1/P4hb/Hif1a/Mapkap1/Sirt1/Pnpla8/App/Dhfr/Fut8	17
GO:0008637	GO:0008637	apoptotic mitochondrial changes	20/1569	120/28814	7.3882094868192e-06	8.97990899607633e-05	6.49223453086247e-05	Slc25a31/Pdcd5/Higd1a/Gclm/Siva1/Hspd1/Sod2/Vdac2/Sh3glb1/Vps35/Atf2/Rnf7/Mtch2/Chchd10/Dap3/Bnip3l/Fam162a/Gclc/Ndufs1/Atpif1	20
GO:0016050	GO:0016050	vesicle organization	35/1569	287/28814	7.40595740111079e-06	8.98078742318607e-05	6.49286961021764e-05	Pafah1b1/Cd2ap/Vapa/Cul3/Hook1/Rab14/Snx3/Tmed10/Bet1/Sar1a/Vamp3/Arf1/Yipf4/Vps4b/Unc13b/Kif5b/Fnbp1l/Tsg101/Gbf1/Tmf1/Eea1/Pikfyve/Gnai3/Ap2m1/Usp8/Chmp4b/Vti1b/Rab11a/Rab5a/Stx12/Agfg1/Mia3/Ap1s2/Rab1a/Sec22b	35
GO:1901796	GO:1901796	regulation of signal transduction by p53 class mediator	16/1569	82/28814	7.60522771149079e-06	9.20127893993438e-05	6.65227909191964e-05	Npm1/Ddx5/Kdm1a/Atr/Mif/Hnrnpk/Rnf34/Atad5/Senp2/Pak1ip1/Sh3glb1/Pttg1ip/Cops3/Mlf1/Mdm2/Sirt1	16
GO:0051443	GO:0051443	positive regulation of ubiquitin-protein transferase activity	9/1569	27/28814	7.88345805565682e-06	9.51607351111893e-05	6.87986716503544e-05	Ube2s/Ube2l3/Dcun1d5/Ube2n/Pin1/Fbxw7/Cdc20/Topors/Stub1	9
GO:0019827	GO:0019827	stem cell population maintenance	25/1569	173/28814	8.0247953653565e-06	9.66456519457889e-05	6.98722268894174e-05	Tpt1/Smc3/Med21/Rif1/Tut4/Nipbl/Zfp706/Med10/Zc3h13/Pcm1/Eif4e/Med7/Ddx6/Smc5/Smarca4/Eif4enif1/Med28/Kdm3a/Ctr9/Gnl3/Apc/Kdm2b/Med6/Jmjd1c/Cdc73	25
GO:0000413	GO:0000413	protein peptidyl-prolyl isomerization	8/1569	21/28814	8.16018396784186e-06	9.80523244427467e-05	7.08892135607027e-05	Ppia/Ppig/Nktr/Ranbp2/Fkbp1a/Pin1/Ppib/Ppil4	8
GO:0010613	GO:0010613	positive regulation of cardiac muscle hypertrophy	11/1569	41/28814	8.3625149889307e-06	0.000100255151287749	7.24817985763061e-05	Rock1/Rock2/Pin1/Ptk2/Mtpn/Ddx39b/Parp1/Mef2a/Adk/Sirt1/Becn1	11
GO:0007034	GO:0007034	vacuolar transport	23/1569	152/28814	8.43985941441127e-06	0.000100682807698796	7.27909827473657e-05	Hspa8/Hook1/Vps29/Vcp/Arf1/Vps35/Vps4b/Tsg101/Vps13a/Ndfip1/Zfyve16/Chmp4b/Vps37a/Vti1b/Gcc2/Nedd4/Snx27/Ap3s1/Lamp1/Ap1g1/Snf8/Lamp2/Becn1	23
GO:0070534	GO:0070534	protein K63-linked ubiquitination	14/1569	65/28814	8.4554471678799e-06	0.000100682807698796	7.27909827473657e-05	Ube2s/Ube2b/Ube2t/Zfp91/Trip12/Ube2n/Rnf4/Hectd1/Ube2e3/Ube2v2/Ubr5/Nedd4/Peli1/Stub1	14
GO:0098930	GO:0098930	axonal transport	14/1569	65/28814	8.4554471678799e-06	0.000100682807698796	7.27909827473657e-05	Pafah1b1/Fmr1/Sod1/Kif1b/Spg7/Kif5b/Actr10/Spast/Kif3a/Dync1h1/Hif1a/Hsbp1/Ap3s1/Mapk8ip3	14
GO:0010948	GO:0010948	negative regulation of cell cycle process	35/1569	289/28814	8.6313406096637e-06	0.000102545769630577	7.4137854501687e-05	Npm1/Smarca5/Hormad1/Tpr/Bub1/Tipin/Ccp110/Atr/Topbp1/Wapl/Nae1/Nabp1/Usp47/Nek1/Taok1/Rad17/Cdc5l/Trim37/Ezh2/Cenpe/Brd7/Cdk1/Gigyf2/Atf2/Ddx39b/Dtl/Ik/Clspn/Baz1b/Thoc1/Tex14/Apc/Mdm2/Zfp207/Cdc73	35
GO:1900152	GO:1900152	negative regulation of nuclear-transcribed mRNA catabolic process, deadenylation-dependent decay	6/1569	11/28814	9.41088897331295e-06	0.000111556043447698	8.065204198773e-05	Hnrnpu/Ybx1/Csde1/Syncrip/Hnrnpd/Paip1	6
GO:0021987	GO:0021987	cerebral cortex development	19/1569	112/28814	9.52728060082867e-06	0.000112430436620517	8.12842049141699e-05	Pafah1b1/Hnrnpk/Ywhae/Rtn4/Mdk/Pex13/Rhoa/Rac1/Rnf7/Srgap2/Ctnnb1/Cul5/Celf1/Hif1a/Afdn/Nars/Lrp6/Tra2b/Tacc1	19
GO:1903008	GO:1903008	organelle disassembly	19/1569	112/28814	9.52728060082867e-06	0.000112430436620517	8.12842049141699e-05	Tomm7/Huwe1/Rb1cc1/Denr/Vcp/Kif5b/Gbf1/Cdk1/Fbxw7/Spast/Map1lc3b/Gabarapl2/Hif1a/Bnip3l/Phb2/Cisd2/Ufm1/Atpif1/Becn1	19
GO:0007338	GO:0007338	single fertilization	24/1569	164/28814	9.72286023680714e-06	0.000114482338725798	8.27676753711284e-05	H3f3b/Snu13/H3f3a/Tex101/Ly6k/Ubap2l/Cct3/Cct8/Kdm5b/Cct2/Cct4/Park7/Cct6a/Tcp1/Ash1l/Vdac2/Ube3a/Cct7/Cct5/Unc13b/Slirp/Kmt2c/Cecr2/Clgn	24
GO:0000075	GO:0000075	cell cycle checkpoint signaling	25/1569	175/28814	9.84695881216612e-06	0.000115685317893488	8.36373972019174e-05	Hormad1/Tpr/Bub1/Tipin/Atr/Topbp1/Nae1/Nabp1/Nek1/Taok1/Rad17/Cdc5l/Cenpe/Cdk1/Gigyf2/Atf2/Ddx39b/Dtl/Ik/Clspn/Thoc1/Tex14/Apc/Mdm2/Zfp207	25
GO:0051783	GO:0051783	regulation of nuclear division	22/1569	143/28814	1.00349599953112e-05	0.000117632031056148	8.50448188608478e-05	Stra8/Dazl/Calr/Hormad1/Tpr/Mki67/Bub1/Ube2b/Cdc42/Cul3/Cdk11b/Anapc5/Cenpe/Prdm9/Psma8/Ik/Kif20b/Cdc20/Tex14/Apc/Anapc11/Zfp207	22
GO:0051851	GO:0051851	modulation by host of symbiont process	14/1569	66/28814	1.01978395883426e-05	0.000119276283433498	8.62335694446619e-05	Hspa8/Fmr1/Cfl1/Vapa/Ythdc2/Hdac1/Smarca4/Nucks1/Ppib/Rrp1b/Taf11/Tardbp/Psmc3/Ep300	14
GO:0000054	GO:0000054	ribosomal subunit export from nucleus	7/1569	16/28814	1.03674540255232e-05	0.000120458854591707	8.70885368292851e-05	Npm1/Ran/Nup88/Nmd3/Xpo1/Ltv1/Sdad1	7
GO:0032239	GO:0032239	regulation of nucleobase-containing compound transport	7/1569	16/28814	1.03674540255232e-05	0.000120458854591707	8.70885368292851e-05	Tpr/Iws1/Khdrbs1/Thoc2/Nup153/Akap8l/Setd2	7
GO:0033750	GO:0033750	ribosome localization	7/1569	16/28814	1.03674540255232e-05	0.000120458854591707	8.70885368292851e-05	Npm1/Ran/Nup88/Nmd3/Xpo1/Ltv1/Sdad1	7
GO:1904589	GO:1904589	regulation of protein import	16/1569	84/28814	1.05010876765105e-05	0.000121743379106798	8.80172137698035e-05	Tpr/Hsp90ab1/Ran/Pdcd5/Sumo1/Tomm70a/Cdk1/Pkig/Ubr5/Tardbp/Ppp2ca/Trim28/Nup54/App/Hnrnpm/Ufm1	16
GO:0014742	GO:0014742	positive regulation of muscle hypertrophy	11/1569	42/28814	1.07743583236847e-05	0.000124637588064554	9.0109649599976e-05	Rock1/Rock2/Pin1/Ptk2/Mtpn/Ddx39b/Parp1/Mef2a/Adk/Sirt1/Becn1	11
GO:0048477	GO:0048477	oogenesis	19/1569	113/28814	1.08748911979267e-05	0.000125525275862283	9.07514241853932e-05	Stra8/Dazl/H3f3b/H3f3a/4930447C04Rik/Hormad1/Brca2/Tut4/Meioc/Ythdc1/Dmc1/Ythdc2/Cntrl/Tdrkh/Mdk/Taf4b/Ythdf2/Ctnnb1/Hfm1	19
GO:0016577	GO:0016577	histone demethylation	9/1569	28/28814	1.10567799556598e-05	0.00012706865853182	9.18672486626655e-05	Kdm5b/Kdm5a/Ube2b/Kdm1a/Kdm7a/Kdm2a/Kdm3a/Kdm2b/Jmjd1c	9
GO:0070076	GO:0070076	histone lysine demethylation	9/1569	28/28814	1.10567799556598e-05	0.00012706865853182	9.18672486626655e-05	Kdm5b/Kdm5a/Ube2b/Kdm1a/Kdm7a/Kdm2a/Kdm3a/Kdm2b/Jmjd1c	9
GO:0043666	GO:0043666	regulation of phosphoprotein phosphatase activity	13/1569	58/28814	1.11430330121859e-05	0.000127781519868002	9.23826283824935e-05	Hsp90ab1/Hsp90b1/Rock1/Rock2/Ppp1r2/Calm1/Bod1l/Ppp1r12a/Calm2/Calm3/Gnai2/Ppp2ca/Mprip	13
GO:0010563	GO:0010563	negative regulation of phosphorus metabolic process	48/1569	457/28814	1.12719556449272e-05	0.000128700359365781	9.30469248156098e-05	Npm1/Ppia/Dynll1/Rack1/Actb/Wnk1/Rock1/Hnrnpu/Dnaja1/Rock2/Dnajc3/Ube2b/Rtraf/Park7/Tmed2/Arpp19/Uri1/Ywhae/Bod1l/Ppp4r2/Hspa4/Prkar1a/Gnai2/Ppp4r3b/Inca1/Tsg101/Taf7/Adarb1/Mtch2/Pkig/Ptpn2/Parp1/Stk38/Dnajc10/Ibtk/Chordc1/Tardbp/Ppp2ca/Ncor1/Apc/Cep85/Sirt1/Lrp6/Mprip/Ppp4c/Eif4g1/Bag4/Ensa	48
GO:0045936	GO:0045936	negative regulation of phosphate metabolic process	48/1569	457/28814	1.12719556449272e-05	0.000128700359365781	9.30469248156098e-05	Npm1/Ppia/Dynll1/Rack1/Actb/Wnk1/Rock1/Hnrnpu/Dnaja1/Rock2/Dnajc3/Ube2b/Rtraf/Park7/Tmed2/Arpp19/Uri1/Ywhae/Bod1l/Ppp4r2/Hspa4/Prkar1a/Gnai2/Ppp4r3b/Inca1/Tsg101/Taf7/Adarb1/Mtch2/Pkig/Ptpn2/Parp1/Stk38/Dnajc10/Ibtk/Chordc1/Tardbp/Ppp2ca/Ncor1/Apc/Cep85/Sirt1/Lrp6/Mprip/Ppp4c/Eif4g1/Bag4/Ensa	48
GO:0072593	GO:0072593	reactive oxygen species metabolic process	31/1569	245/28814	1.15302559458376e-05	0.000131365227028712	9.49735530107303e-05	Eef1a1/Prdx4/Prdx1/Eif5a/Arf4/Sod1/Park7/Atp5g1/Hspd1/Ndufc2/Sod2/Cycs/Romo1/Gnai2/Gbf1/Rhoa/Slc25a33/Cyct/Ndufs4/Pikfyve/Gnai3/Ndufs3/Pdk3/Hif1a/Prdx5/Sirt1/App/Dhfr/Ndufs1/Atpif1/Becn1	31
GO:0044743	GO:0044743	protein transmembrane import into intracellular organelle	10/1569	35/28814	1.16751603171943e-05	0.000132729462657758	9.59598589591537e-05	Tomm7/Tomm20/Dnajc19/Hspd1/Dnajc15/Romo1/Pex13/Timm23/Timm17b/Pex7	10
GO:0035303	GO:0035303	regulation of dephosphorylation	21/1569	134/28814	1.18404807556908e-05	0.000134319432228535	9.71093645226205e-05	Ppia/Hsp90ab1/Hsp90b1/Rock1/Rock2/Ppp1r2/Calm1/Arpp19/Uri1/Ywhae/Bod1l/Camta1/Ppp1r12a/Calm2/Pin1/Calm3/Gnai2/Ppp2ca/Mprip/Bag4/Ensa	21
GO:1903427	GO:1903427	negative regulation of reactive oxygen species biosynthetic process	8/1569	22/28814	1.22105556261611e-05	0.000138077033572318	9.98260100039924e-05	Eef1a1/Park7/Atp5g1/Hspd1/Ndufc2/Cycs/Rhoa/Sirt1	8
GO:0000281	GO:0000281	mitotic cytokinesis	14/1569	67/28814	1.22502467700179e-05	0.000138077033572318	9.98260100039924e-05	Rock1/Stmn1/Rock2/Cfl1/Son/Kif23/Arf1/Vps4b/Rhoa/Spast/Kif20b/Usp8/Chmp4b/Apc	14
GO:0070988	GO:0070988	demethylation	14/1569	67/28814	1.22502467700179e-05	0.000138077033572318	9.98260100039924e-05	Kdm5b/Kdm5a/Ube2b/Kdm1a/Usp9x/Alkbh5/Kdm7a/Otud4/Kdm2a/Kdm3a/Usp7/Trim28/Kdm2b/Jmjd1c	14
GO:0051053	GO:0051053	negative regulation of DNA metabolic process	23/1569	156/28814	1.30540037868021e-05	0.000146822750480557	0.000106148929905923	Sub1/Brca2/Tipin/Hnrnpu/Rif1/Atr/Wapl/Dnajc2/Trip12/Rad17/Smchd1/Kmt2a/Rad50/Gmnn/Lig3/Ndfip1/Parp1/Rad18/Ubr5/Thoc1/Gtpbp4/Pds5a/Trim28	23
GO:1902904	GO:1902904	negative regulation of supramolecular fiber organization	25/1569	178/28814	1.32909154894648e-05	0.000149169317461547	0.000107845435203429	Mphosph8/Hspa8/Stmn1/Cfl1/Pfdn2/Pfdn5/Arpc2/Taok1/Hdgfl3/Sptan1/Tpx2/Pfdn4/Pak2/Pfn1/Mtpn/Mapre1/Capza2/Add3/Pfdn6/Eml4/Tmsb15b2/Apc/Tjp1/Rdx/Tmsb4x	25
GO:0009117	GO:0009117	nucleotide metabolic process	47/1569	447/28814	1.34708023861235e-05	0.000150867266638645	0.000109073007140296	Atp5g2/Hint1/Atp5j/Atp5e/Ran/Atp5l/Atp5b/Atp5h/Mpc2/Atp5j2/Nme2/Park7/Atp5g1/Atp5d/Ndufc2/Dctpp1/Mpc1/Vcp/Impdh2/Atp5a1/Atp5o/Atp5g3/Adss/Atp5c1/Rhoa/Dut/Mtch2/Gnai3/Parp1/Cmpk1/Dld/Gmps/Pkm/Pdk3/Hif1a/Nme1/Far1/Adk/Ncor1/Atp5k/Zbtb20/Ep300/Suclg1/App/Ak2/Oga/Hprt	47
GO:0006900	GO:0006900	vesicle budding from membrane	13/1569	59/28814	1.35842033261291e-05	0.00015181498420621	0.000109758181647114	Vapa/Cul3/Snx3/Tmed10/Sar1a/Arf1/Fnbp1l/Gbf1/Ap2m1/Chmp4b/Mia3/Ap1s2/Rab1a	13
GO:0045740	GO:0045740	positive regulation of DNA replication	12/1569	51/28814	1.42506644488962e-05	0.000158926543272574	0.000114899649044956	Npm1/Smarca5/Cacybp/Cdc42/Cst3/Pcna/Atad5/Cdk1/Rac1/Atf1/Dbf4/Faf1	12
GO:0007286	GO:0007286	spermatid development	31/1569	248/28814	1.47242595451662e-05	0.000163861749157704	0.000118467671179518	H3f3b/Taf7l/Sycp1/Pafah1b1/1700013H16Rik/Meioc/Sycp3/Ube2b/Hmgb2/Rnf17/Dmc1/Qk/Hook1/Ythdc2/Selenof/Slirp/Hspa2/Tmf1/Strbp/Aff4/Alms1/Celf1/Ift88/Rsph1/Dld/Kdm3a/Topaz1/Xlr/Brip1/Adad1/Agfg1	31
GO:2001021	GO:2001021	negative regulation of response to DNA damage stimulus	15/1569	77/28814	1.48361107471045e-05	0.000164758914086266	0.000119116297477584	Tpt1/Rif1/Kdm1a/Mif/Atad5/Trip12/Usp47/Smchd1/Senp2/Ddx39b/Pttg1ip/Ubr5/Thoc1/Mdm2/Sirt1	15
GO:0008156	GO:0008156	negative regulation of DNA replication	9/1569	29/28814	1.52586700018375e-05	0.000169095555167422	0.000122251573234536	Brca2/Tipin/Atr/Wapl/Rad17/Gmnn/Lig3/Gtpbp4/Pds5a	9
GO:0035036	GO:0035036	sperm-egg recognition	13/1569	60/28814	1.64828267594396e-05	0.000182278639740134	0.00013178259152477	Tex101/Ly6k/Ubap2l/Cct3/Cct8/Cct2/Cct4/Cct6a/Tcp1/Vdac2/Cct7/Cct5/Clgn	13
GO:0000729	GO:0000729	DNA double-strand break processing	7/1569	17/28814	1.67943972273093e-05	0.000184948737732895	0.000133713001108761	4930447C04Rik/Rnf138/Rbbp8/Ube2n/Ube2v2/Brip1/Smarcad1	7
GO:0033127	GO:0033127	regulation of histone phosphorylation	7/1569	17/28814	1.67943972273093e-05	0.000184948737732895	0.000133713001108761	Fmr1/Ube2b/Slk/Ppp4r2/Ppp4r3b/Akap8l/Ppp4c	7
GO:0016925	GO:0016925	protein sumoylation	11/1569	44/28814	1.74586617920833e-05	0.000191464534206319	0.00013842374805278	Sumo2/Ube2i/Park7/Sumo1/Uba2/Zfp451/Sae1/Ctnnb1/Gnl3/Trim28/Topors	11
GO:1901998	GO:1901998	toxin transport	11/1569	44/28814	1.74586617920833e-05	0.000191464534206319	0.00013842374805278	Cct3/Dnaja1/Cct8/Hspa5/Cct2/Cct4/Cct6a/Tcp1/Copb2/Cct7/Cct5	11
GO:0060260	GO:0060260	regulation of transcription initiation from RNA polymerase II promoter	12/1569	52/28814	1.76130874585291e-05	0.000192757336812741	0.000139358409832389	Sub1/Hmgb1/Gtf2a2/Dhx36/Psmc6/Med13/Taf4b/Taf7/Zfp451/Taf10/Taf11/Med4	12
GO:0032968	GO:0032968	positive regulation of transcription elongation from RNA polymerase II promoter	8/1569	23/28814	1.78290254645633e-05	0.000194716582454599	0.000140774892139289	Eloc/Supt16/Cdk12/Cdk13/Ctnnb1/Eapp/Gtf2f1/Cdc73	8
GO:0075522	GO:0075522	IRES-dependent viral translational initiation	6/1569	12/28814	1.79508690898861e-05	0.000195642219936259	0.000141444103333313	Ssb/Pcbp2/Eif3a/Denr/Csde1/Eif3d	6
GO:0003300	GO:0003300	cardiac muscle hypertrophy	18/1569	107/28814	1.82530776564645e-05	0.000198117252341255	0.00014323348570364	Rock1/Rock2/Tomm70a/Jarid2/Ezh2/Pin1/Atp2a2/Ptk2/Mtpn/Ddx39b/Pak1/Yy1/Parp1/Glrx3/Mef2a/Adk/Sirt1/Becn1	18
GO:0036503	GO:0036503	ERAD pathway	18/1569	107/28814	1.82530776564645e-05	0.000198117252341255	0.00014323348570364	Calr/Hsp90b1/Ubxn1/Hspa5/Ubxn4/Sec61b/Erlec1/Vcp/Psmc6/Ube2j2/Dnajc10/Canx/Usp19/Faf2/Faf1/Clgn/Stub1/Bcap31	18
GO:1902600	GO:1902600	proton transmembrane transport	16/1569	88/28814	1.93811416770203e-05	0.000209499021201398	0.000151462200810709	Atp5g2/Ndufa4/Atp5b/Atp6v0c/Atp6v0b/Atp6v1g1/Park7/Atp5g1/Atp5d/Cox17/Atp5a1/Atp5g3/Ndufs7/Atp6v1f/Atp6v1h/Phb2	16
GO:2001251	GO:2001251	negative regulation of chromosome organization	16/1569	88/28814	1.93811416770203e-05	0.000209499021201398	0.000151462200810709	H3f3b/H3f3a/Smarca5/Tpr/Bub1/Hnrnpu/Top2a/Wapl/Rad50/Cenpe/Ik/Parp1/Baz1b/Tex14/Apc/Zfp207	16
GO:1903409	GO:1903409	reactive oxygen species biosynthetic process	13/1569	61/28814	1.9910035153888e-05	0.000214775941588465	0.000155277273409829	Eef1a1/Sod1/Park7/Atp5g1/Hspd1/Ndufc2/Sod2/Cycs/Gbf1/Rhoa/Slc25a33/Pikfyve/Sirt1	13
GO:0018208	GO:0018208	peptidyl-proline modification	10/1569	37/28814	2.00497906610724e-05	0.000214964727108043	0.000155413760301809	Ppia/Prdx4/Ppig/Nktr/Ranbp2/Fkbp1a/Pin1/Ppib/P4hb/Ppil4	10
GO:0043516	GO:0043516	regulation of DNA damage response, signal transduction by p53 class mediator	10/1569	37/28814	2.00497906610724e-05	0.000214964727108043	0.000155413760301809	Npm1/Ddx5/Kdm1a/Atr/Mif/Senp2/Pttg1ip/Cops3/Mdm2/Sirt1	10
GO:0051084	GO:0051084	'de novo' post-translational protein folding	10/1569	37/28814	2.00497906610724e-05	0.000214964727108043	0.000155413760301809	Hspa8/Hspa5/Ptges3/Cct2/Hspe1/Hspa9/Sh3glb1/Selenof/Hspa2/St13	10
GO:0006753	GO:0006753	nucleoside phosphate metabolic process	47/1569	455/28814	2.12388761411059e-05	0.000227251666621366	0.000164296889632169	Atp5g2/Hint1/Atp5j/Atp5e/Ran/Atp5l/Atp5b/Atp5h/Mpc2/Atp5j2/Nme2/Park7/Atp5g1/Atp5d/Ndufc2/Dctpp1/Mpc1/Vcp/Impdh2/Atp5a1/Atp5o/Atp5g3/Adss/Atp5c1/Rhoa/Dut/Mtch2/Gnai3/Parp1/Cmpk1/Dld/Gmps/Pkm/Pdk3/Hif1a/Nme1/Far1/Adk/Ncor1/Atp5k/Zbtb20/Ep300/Suclg1/App/Ak2/Oga/Hprt	47
GO:2000144	GO:2000144	positive regulation of DNA-templated transcription, initiation	12/1569	53/28814	2.16467678522119e-05	0.000231147166842951	0.000167113232321678	Sub1/Gtf2a2/Dhx36/Bclaf1/Psmc6/Med13/Taf4b/Taf7/Taf10/Taf11/Setx/Med4	12
GO:0043500	GO:0043500	muscle adaptation	20/1569	129/28814	2.22626853394484e-05	0.000237243768011294	0.000171520912248425	Rock1/Rock2/Tomm70a/Jarid2/Ezh2/Pin1/Atp2a2/Ptk2/Mtpn/Ddx39b/Ndufs4/Pak1/Yy1/Parp1/Glrx3/Mef2a/Adk/Sirt1/Becn1/Oga	20
GO:0060996	GO:0060996	dendritic spine development	20/1569	130/28814	2.49813403648464e-05	0.000265678569404365	0.000192078514732255	Pafah1b1/Fmr1/Arf4/Cfl1/Cdc42/Hnrnpk/Pbrm1/Caprin2/Dhx36/Uba6/Caprin1/Ube3a/Arf1/Tanc2/Pak2/Rac1/Srgap2/Pak1/Afdn/Hdac2	20
GO:1902686	GO:1902686	mitochondrial outer membrane permeabilization involved in programmed cell death	10/1569	38/28814	2.58876029647844e-05	0.000274762788006514	0.000198646162324291	Slc25a31/Siva1/Vdac2/Sh3glb1/Spg7/Atf2/Chchd10/Bnip3l/Gclc/Atpif1	10
GO:1902882	GO:1902882	regulation of response to oxidative stress	17/1569	100/28814	2.6853915485498e-05	0.000284446594751007	0.000205647296140264	Ppia/Rack1/Sod1/Sfpq/Park7/Sod2/Fbxw7/Ctnnb1/Parp1/P4hb/Hif1a/Mapkap1/Sirt1/Pnpla8/App/Dhfr/Fut8	17
GO:0032922	GO:0032922	circadian regulation of gene expression	14/1569	72/28814	2.89891566405211e-05	0.000306448499556611	0.000221554086085029	Hnrnpu/Kdm5a/Mycbp2/Top1/Huwe1/Hdac1/Kmt2a/Kdm2a/Ppp1cb/Ppp1ca/Maged1/Ncor1/Hdac2/Sirt1	14
GO:0048515	GO:0048515	spermatid differentiation	31/1569	257/28814	2.97510295920525e-05	0.000313873362196154	0.000226922063604224	H3f3b/Taf7l/Sycp1/Pafah1b1/1700013H16Rik/Meioc/Sycp3/Ube2b/Hmgb2/Rnf17/Dmc1/Qk/Hook1/Ythdc2/Selenof/Slirp/Hspa2/Tmf1/Strbp/Aff4/Alms1/Celf1/Ift88/Rsph1/Dld/Kdm3a/Topaz1/Xlr/Brip1/Adad1/Agfg1	31
GO:1903578	GO:1903578	regulation of ATP metabolic process	16/1569	91/28814	2.98930352531855e-05	0.000314742037845416	0.000227550092913733	Cox7a2/Uqcc2/Cox7a2l/Ndufc2/Vcp/Dnajc15/Rhoa/Slc25a33/Mtch2/Parp1/Hif1a/Ncor1/Zbtb20/Ep300/App/Atpif1	16
GO:0045862	GO:0045862	positive regulation of proteolysis	39/1569	357/28814	3.03925256566498e-05	0.000318145591022639	0.000230010771020209	Rack1/Sumo2/Hspa8/Casp8ap2/Hmgb1/Anp32b/Fmr1/Rbx1/Rock2/Cfl1/Pdcd5/Sumo1/Hspd1/Vcp/Cycs/Ptk2/Nrd1/Rhoa/Ube2v2/Aurkaip1/Fbxw7/Rnf7/Cyct/Mtch2/Cdc20/Ppp2ca/Hdac2/Fam162a/Gclc/Mdm2/Sirt1/App/Cop1/Arih1/Atpif1/Stub1/Bcap31/Oga/Ruvbl1	39
GO:0014897	GO:0014897	striated muscle hypertrophy	18/1569	111/28814	3.04575399936366e-05	0.000318145591022639	0.000230010771020209	Rock1/Rock2/Tomm70a/Jarid2/Ezh2/Pin1/Atp2a2/Ptk2/Mtpn/Ddx39b/Pak1/Yy1/Parp1/Glrx3/Mef2a/Adk/Sirt1/Becn1	18
GO:0071482	GO:0071482	cellular response to light stimulus	18/1569	111/28814	3.04575399936366e-05	0.000318145591022639	0.000230010771020209	Npm1/Fmr1/Eif2s1/Kdm1a/Atr/Pcna/Dhx36/Usp47/Cops9/Fbxw7/Cul4b/Rpgr/Yy1/Parp1/Nedd4/Ddb1/Ep300/Sirt1	18
GO:1905037	GO:1905037	autophagosome organization	18/1569	111/28814	3.04575399936366e-05	0.000318145591022639	0.000230010771020209	Rb1cc1/Emc6/Pik3c2a/Sh3glb1/Atp2a2/Pikfyve/Map1lc3b/Ift88/Gabarapl2/Ift20/Chmp4b/Nsfl1c/Ubxn2a/Trappc8/Stx12/Rab1a/Becn1/Sec22b	18
GO:0010452	GO:0010452	histone H3-K36 methylation	6/1569	13/28814	3.17963670252678e-05	0.000330168968618676	0.000238703352118826	Iws1/Nsd1/Nsd2/Ash1l/Prdm9/Setd2	6
GO:0070816	GO:0070816	phosphorylation of RNA polymerase II C-terminal domain	6/1569	13/28814	3.17963670252678e-05	0.000330168968618676	0.000238703352118826	Cdk12/Gtf2h5/Cdk13/Gtf2h1/Ppil4/Ccnh	6
GO:1905214	GO:1905214	regulation of RNA binding	6/1569	13/28814	3.17963670252678e-05	0.000330168968618676	0.000238703352118826	Fmr1/Eif3e/Nucks1/Eif3d/Hnrnpl/Eif4g1	6
GO:0021537	GO:0021537	telencephalon development	31/1569	258/28814	3.20828614810958e-05	0.000332489379789352	0.000240380947463572	Pafah1b1/Dbi/Hnrnpk/Ywhae/Usp9x/Uba6/Rtn4/Hdac1/Grcc10/Mdk/Pex13/Uqcrq/Rhoa/Rac1/Rnf7/Srgap2/Ctnnb1/Cul5/Kif3a/Celf1/Ift88/Arl13b/Hif1a/Afdn/Nars/Hdac2/Kdm2b/Lrp6/Tra2b/Tacc1/Hprt	31
GO:0051303	GO:0051303	establishment of chromosome localization	15/1569	82/28814	3.24550563493632e-05	0.000335687102437041	0.000242692815590801	Cenpf/Brca2/Hnrnpu/Meioc/Ube2b/Nudc/Cul3/Cdca8/Cenpe/Vps4b/Chmp4b/Dync1h1/Eml4/Rab11a/Becn1	15
GO:0043434	GO:0043434	response to peptide hormone	39/1569	359/28814	3.44291768829022e-05	0.000355408822029959	0.000256951092484818	Cacybp/Rock1/Srsf3/Ybx1/Rock2/Cfl1/Hnrnpk/Cyc1/Eprs/Syap1/Cited1/Smarcc1/Atp2b1/Srsf5/Nucks1/Atp2a2/Gnai2/Ptk2/Rab10/Rac1/Slc25a33/Uchl3/Eif2b3/Pak1/Ptpra/Ctnnb1/Ptpn2/Parp1/Appl1/Hadha/Zfp106/Jak1/Pkm/Chuk/Apc/Sirt1/Ahcyl1/Osbpl8/Rbp4	39
GO:0030900	GO:0030900	forebrain development	42/1569	398/28814	3.47946057546069e-05	0.000358479580772561	0.000259171169097329	Pafah1b1/Dbi/Kras/Kdm1a/Hnrnpk/Ywhae/Usp9x/Top2b/Uba6/Rtn4/Pcm1/Hdac1/Grcc10/Mdk/Smarca4/Aplp2/Pex13/Uqcrq/Rhoa/Rac1/Rnf7/Srgap2/Pak1/Ctnnb1/Cul5/Kif3a/Celf1/Ift88/Arl13b/Hif1a/Afdn/Ncor1/Nars/Hdac2/Kdm2b/Mapk8ip3/Lrp6/App/Setd2/Tra2b/Tacc1/Hprt	42
GO:0006892	GO:0006892	post-Golgi vesicle-mediated transport	17/1569	102/28814	3.49575893375128e-05	0.000359456693480273	0.000259877595505917	Rack1/Chic2/Golga4/Rab14/Vps29/Vamp3/Macf1/Gbf1/Rab10/Eps15/Rabep1/Vti1b/Ap3s1/Lamp1/Ap1g1/Commd1/Dop1a	17
GO:0006359	GO:0006359	regulation of transcription by RNA polymerase III	8/1569	25/28814	3.56669501174577e-05	0.000364618530755018	0.000263609466086392	Smarca5/Dek/Dhx36/Sf3b1/Baz1b/Ddx21/Prdx5/Chd8	8
GO:0090151	GO:0090151	establishment of protein localization to mitochondrial membrane	8/1569	25/28814	3.56669501174577e-05	0.000364618530755018	0.000263609466086392	Hsp90aa1/Pdcd5/Hspa4/Tomm22/Timm13/Romo1/Sh3glb1/Mtch2	8
GO:1903747	GO:1903747	regulation of establishment of protein localization to mitochondrion	8/1569	25/28814	3.56669501174577e-05	0.000364618530755018	0.000263609466086392	Tomm7/Dnaja1/Pdcd5/Sh3glb1/Fbxw7/Bnip3l/Atpif1/Bag4	8
GO:0006482	GO:0006482	protein demethylation	9/1569	32/28814	3.68481841575605e-05	0.000375239713187513	0.000271288297506283	Kdm5b/Kdm5a/Ube2b/Kdm1a/Kdm7a/Kdm2a/Kdm3a/Kdm2b/Jmjd1c	9
GO:0008214	GO:0008214	protein dealkylation	9/1569	32/28814	3.68481841575605e-05	0.000375239713187513	0.000271288297506283	Kdm5b/Kdm5a/Ube2b/Kdm1a/Kdm7a/Kdm2a/Kdm3a/Kdm2b/Jmjd1c	9
GO:0014896	GO:0014896	muscle hypertrophy	18/1569	113/28814	3.89352543684756e-05	0.000395729223109266	0.000286101666315763	Rock1/Rock2/Tomm70a/Jarid2/Ezh2/Pin1/Atp2a2/Ptk2/Mtpn/Ddx39b/Pak1/Yy1/Parp1/Glrx3/Mef2a/Adk/Sirt1/Becn1	18
GO:0006613	GO:0006613	cotranslational protein targeting to membrane	7/1569	19/28814	3.95145412791289e-05	0.000398545325520851	0.000288137633197714	Srp9/Arl6ip1/Sec61b/Srp19/Srp14/Sec63/Ssr3	7
GO:0019081	GO:0019081	viral translation	7/1569	19/28814	3.95145412791289e-05	0.000398545325520851	0.000288137633197714	Ssb/Pcbp2/Eif3a/Denr/Csde1/Eif3g/Eif3d	7
GO:0030150	GO:0030150	protein import into mitochondrial matrix	7/1569	19/28814	3.95145412791289e-05	0.000398545325520851	0.000288137633197714	Tomm7/Tomm20/Dnajc19/Dnajc15/Romo1/Timm23/Timm17b	7
GO:0045292	GO:0045292	mRNA cis splicing, via spliceosome	7/1569	19/28814	3.95145412791289e-05	0.000398545325520851	0.000288137633197714	Psip1/Cwc15/Prpf40a/Srsf1/Snrpc/Wbp11/Wbp4	7
GO:0000045	GO:0000045	autophagosome assembly	17/1569	103/28814	3.97688995259536e-05	0.000400345314884362	0.00028943897746591	Rb1cc1/Emc6/Sh3glb1/Atp2a2/Pikfyve/Map1lc3b/Ift88/Gabarapl2/Ift20/Chmp4b/Nsfl1c/Ubxn2a/Trappc8/Stx12/Rab1a/Becn1/Sec22b	17
GO:0010824	GO:0010824	regulation of centrosome duplication	11/1569	48/28814	4.20833147110334e-05	0.000422837114477526	0.000305699948266815	Npm1/Rock2/Trim37/Vps4b/Alms1/Xpo1/Chmp4b/Cep295/Chordc1/Plk4/Sirt1	11
GO:0050000	GO:0050000	chromosome localization	15/1569	84/28814	4.35399574405857e-05	0.000436641208173174	0.000315679939578231	Cenpf/Brca2/Hnrnpu/Meioc/Ube2b/Nudc/Cul3/Cdca8/Cenpe/Vps4b/Chmp4b/Dync1h1/Eml4/Rab11a/Becn1	15
GO:0051298	GO:0051298	centrosome duplication	14/1569	75/28814	4.66849430193099e-05	0.00046729236134129	0.000337839905241106	Npm1/Brca2/Rock2/Ckap5/Ccp110/Trim37/Vps4b/Alms1/Xpo1/Chmp4b/Cep295/Chordc1/Plk4/Sirt1	14
GO:0048026	GO:0048026	positive regulation of mRNA splicing, via spliceosome	9/1569	33/28814	4.82269716368082e-05	0.000480902221898229	0.000347679471177308	Ncl/Hspa8/Cirbp/Tra2a/Snrnp70/Thrap3/Rbmxl2/Tra2b/Dazap1	9
GO:0071168	GO:0071168	protein localization to chromatin	9/1569	33/28814	4.82269716368082e-05	0.000480902221898229	0.000347679471177308	Esco2/Nipbl/Wapl/Vcp/Pphln1/Jarid2/Ezh2/Mcm8/Setd2	9
GO:0051307	GO:0051307	meiotic chromosome separation	8/1569	26/28814	4.90645132475403e-05	0.000488152027409927	0.000352920887065336	Top2a/Sycp3/Top2b/Tex11/M1ap/Meiob/Hfm1/Ncapd3	8
GO:1903900	GO:1903900	regulation of viral life cycle	21/1569	147/28814	4.91390950814543e-05	0.000488152027409927	0.000352920887065336	Ppia/Ddx5/Mphosph8/Fmr1/Top2a/Fkbp6/Bsg/Setdb1/Pkn2/Banf1/Top2b/Snx3/Rad50/Tsg101/Adarb1/Ilf3/Srpk1/P4hb/Trim28/Ddb1/Kpna2	21
GO:0032210	GO:0032210	regulation of telomere maintenance via telomerase	11/1569	49/28814	5.16127772697721e-05	0.000511762030259489	0.00036999028897583	Cct3/Hnrnpu/Cct8/Cct2/Cct4/Atr/Cct6a/Tcp1/Cct7/Cct5/Ctnnb1	11
GO:0009266	GO:0009266	response to temperature stimulus	23/1569	170/28814	5.26539549209957e-05	0.000521106214274395	0.000376745884622825	Tpr/Hsp90ab1/Hsp90aa1/Cirbp/Dnaja1/Dnajc3/Sod1/Psip1/Eif2s1/Dnaja2/Sumo1/Rnf34/Ywhae/Dhx36/Hspa4/Vcp/Rbbp7/Hikeshi/Eif2b3/Chordc1/Hsbp1/Gclc/Stub1	23
GO:0035794	GO:0035794	positive regulation of mitochondrial membrane permeability	10/1569	41/28814	5.28756440914812e-05	0.000522320267008545	0.000377623612346612	Slc25a31/Siva1/Vdac2/Sh3glb1/Spg7/Atf2/Chchd10/Bnip3l/Gclc/Atpif1	10
GO:0007163	GO:0007163	establishment or maintenance of cell polarity	28/1569	229/28814	5.55371745743321e-05	0.000547586160522621	0.000395890179011914	Actb/Pafah1b1/Hsp90ab1/Hsp90aa1/Arf4/Ckap5/Cfl1/Cdc42/Cep290/Spint2/Stk25/Myo9a/Macf1/Krit1/Gbf1/Rab10/Rhoa/Rac1/Pak1/Kif3a/Kif20b/Ift20/Dynlt1b/Nsfl1c/Ctnna1/Apc/Synj2bp/Rab11fip2	28
GO:1902808	GO:1902808	positive regulation of cell cycle G1/S phase transition	12/1569	58/28814	5.62286422271832e-05	0.000553369566694761	0.000400071427315563	Anp32b/Ezh2/Ankrd17/Cul4b/Kmt2e/Larp7/Dbf4/Phb2/Mdm2/Rdx/Eif4g1/Cdc73	12
GO:0010921	GO:0010921	regulation of phosphatase activity	15/1569	86/28814	5.7820416406795e-05	0.000566988921388792	0.000409917857259485	Hsp90ab1/Hsp90b1/Rock1/Rock2/Ppp1r2/Calm1/Uri1/Bod1l/Ppp1r12a/Calm2/Calm3/Gnai2/Ppp2ca/Mprip/Bag4	15
GO:0006620	GO:0006620	post-translational protein targeting to endoplasmic reticulum membrane	7/1569	20/28814	5.79349817305325e-05	0.000566988921388792	0.000409917857259485	Sec62/Hspa5/Sec61b/Sec61g/Sec63/Macf1/Chmp4b	7
GO:0033962	GO:0033962	P-body assembly	7/1569	20/28814	5.79349817305325e-05	0.000566988921388792	0.000409917857259485	Lsm4/Ddx6/Eif4enif1/Lsm3/Dync1h1/Atxn2/Cnot6l	7
GO:0051101	GO:0051101	regulation of DNA binding	19/1569	127/28814	5.84328907958559e-05	0.000570802775829889	0.000412675172228823	Hmgb1/Hmgb2/Calm1/Park7/Sumo1/Nsd1/Hspa4/Lamtor5/Smarca4/Fbxw7/Taf10/Ctnnb1/Parp1/Nme1/Hdac2/Trim28/Gtf2b/Ep300/Sirt1	19
GO:0031334	GO:0031334	positive regulation of protein-containing complex assembly	26/1569	206/28814	5.91356885572107e-05	0.000576600290460788	0.000416866620571601	Rack1/Hsp90aa1/Ckap5/Atr/Park7/Sumo1/Vcp/Arpc2/Brk1/Psmc6/Sh3glb1/Unc13b/Akap9/Pfn1/Rhoa/Rac1/Mapre1/Fnip1/Pak1/Slf1/Apc/Faf1/Slf2/Eif4g1/Stub1/Bag4	26
GO:2000377	GO:2000377	regulation of reactive oxygen species metabolic process	22/1569	160/28814	5.93172548977057e-05	0.000577303541670475	0.000417375052426467	Eef1a1/Eif5a/Arf4/Sod1/Park7/Atp5g1/Hspd1/Ndufc2/Sod2/Cycs/Romo1/Gnai2/Rhoa/Slc25a33/Pikfyve/Gnai3/Pdk3/Hif1a/Sirt1/App/Dhfr/Becn1	22
GO:0045930	GO:0045930	negative regulation of mitotic cell cycle	28/1569	230/28814	6.00095087071486e-05	0.000582965300976443	0.000421468353292623	Tpr/Bub1/Tipin/Meioc/Topbp1/Ythdc2/Nae1/Nabp1/Usp47/Taok1/Rad17/Ezh2/Cenpe/Btg3/Brd7/Cdk1/Gigyf2/Atf2/Dtl/Ctnnb1/Ik/Clspn/Tex14/Angel2/Apc/Mdm2/Zfp207/Cdc73	28
GO:0000731	GO:0000731	DNA synthesis involved in DNA repair	9/1569	34/28814	6.24328507113312e-05	0.000604281261472059	0.000436879223809083	Sycp1/Sycp3/Tex12/Pcna/Vcp/Rev3l/Dtl/Sirt1/Pole	9
GO:1901797	GO:1901797	negative regulation of signal transduction by p53 class mediator	9/1569	34/28814	6.24328507113312e-05	0.000604281261472059	0.000436879223809083	Kdm1a/Mif/Rnf34/Atad5/Senp2/Sh3glb1/Pttg1ip/Mdm2/Sirt1	9
GO:1903426	GO:1903426	regulation of reactive oxygen species biosynthetic process	11/1569	50/28814	6.2937202255572e-05	0.000608047146333594	0.000439601858052704	Eef1a1/Park7/Atp5g1/Hspd1/Ndufc2/Sod2/Cycs/Rhoa/Slc25a33/Pikfyve/Sirt1	11
GO:0042752	GO:0042752	regulation of circadian rhythm	19/1569	128/28814	6.51649515779584e-05	0.000628418865765504	0.00045433006748185	Top2a/Rock2/Kdm5b/Sfpq/Usp9x/Thrap3/Pspc1/Ube3a/Ezh2/Cdk1/Fbxw7/Hnrnpd/Kdm2a/Ppp1cb/Ppp1ca/Maged1/Usp7/Tardbp/Ddb1	19
GO:0000184	GO:0000184	nuclear-transcribed mRNA catabolic process, nonsense-mediated decay	10/1569	42/28814	6.60322958939175e-05	0.000632160364501661	0.000457035071207686	Pabpc1/Hnrnpab/Etf1/Eif3e/Gspt1/Rbm8a/Magoh/Syncrip/Casc3/Rnps1	10
GO:0090224	GO:0090224	regulation of spindle organization	10/1569	42/28814	6.60322958939175e-05	0.000632160364501661	0.000457035071207686	Tpr/Hnrnpu/Senp6/Rae1/Rnf4/Tpx2/Vps4b/Cltc/Chmp4b/Dync1h1	10
GO:1902108	GO:1902108	regulation of mitochondrial membrane permeability involved in apoptotic process	10/1569	42/28814	6.60322958939175e-05	0.000632160364501661	0.000457035071207686	Slc25a31/Siva1/Vdac2/Sh3glb1/Atf2/Mtch2/Chchd10/Bnip3l/Gclc/Atpif1	10
GO:1902275	GO:1902275	regulation of chromatin organization	10/1569	42/28814	6.60322958939175e-05	0.000632160364501661	0.000457035071207686	Mphosph8/Tpr/Mki67/Hnrnpu/Kdm1a/Setdb1/Pphln1/Atf7ip2/Ctr9/Trim28	10
GO:0072331	GO:0072331	signal transduction by p53 class mediator	21/1569	150/28814	6.63435310680738e-05	0.000633418803591149	0.000457944889081713	Npm1/Ddx5/Hint1/Brca2/Kdm1a/Atr/Mif/Hnrnpk/Rnf34/Atad5/Senp2/Pak1ip1/Sh3glb1/Pttg1ip/Cops3/Mlf1/Mdm2/Ep300/Sirt1/Topors/Ppp1r13b	21
GO:0051571	GO:0051571	positive regulation of histone H3-K4 methylation	8/1569	27/28814	6.64039049072806e-05	0.000633418803591149	0.000457944889081713	Kmt2a/Prdm9/Auts2/Kmt2e/Ctnnb1/Ctr9/Nelfe/Phf20	8
GO:0043388	GO:0043388	positive regulation of DNA binding	12/1569	59/28814	6.71165840742608e-05	0.000637909875660767	0.000461191814321568	Hmgb1/Hmgb2/Calm1/Park7/Lamtor5/Smarca4/Ctnnb1/Parp1/Nme1/Trim28/Gtf2b/Ep300	12
GO:0046902	GO:0046902	regulation of mitochondrial membrane permeability	12/1569	59/28814	6.71165840742608e-05	0.000637909875660767	0.000461191814321568	Slc25a31/Siva1/Vdac2/Sh3glb1/Spg7/Atf2/Mtch2/Chchd10/Dynlt1b/Bnip3l/Gclc/Atpif1	12
GO:0044839	GO:0044839	cell cycle G2/M phase transition	21/1569	151/28814	7.31676214932434e-05	0.00069417122909507	0.000501867271241993	Npm1/Cenpf/Calm1/Arpp19/Topbp1/Nae1/Nabp1/Atad5/Usp47/Taok1/Rad17/Calm2/Vps4b/Calm3/Cdk1/Hspa2/Akap8l/Dtl/Clspn/Rab11a/App	21
GO:0032091	GO:0032091	negative regulation of protein binding	16/1569	98/28814	7.59850549614461e-05	0.000719607118351217	0.000520256740291636	Rack1/Actb/Rock1/Ppp1r2/Kdm1a/Park7/Hnrnpk/Senp2/Pin1/Atp2a2/Lrpap1/Tmbim6/Tex14/Gtf2f1/Adnp/Stub1	16
GO:0061647	GO:0061647	histone H3-K9 modification	11/1569	51/28814	7.63260001524078e-05	0.000721540592838622	0.000521654590741697	Rif1/Kdm1a/Arid4b/Setdb1/Jarid2/Kmt2a/Baz2a/Prdm9/Zfp451/Kdm3a/Sirt1	11
GO:0014020	GO:0014020	primary neural tube formation	18/1569	119/28814	7.82570353899382e-05	0.000738472024475714	0.000533895563916291	Luzp1/Rock2/Cfl1/Tmed2/Spint2/Brd2/Rala/Hectd1/Pfn1/Gatad2a/Kif20b/Kdm2a/Hif1a/Enah/Cecr2/Kdm2b/Lrp6/Setd2	18
GO:0016311	GO:0016311	dephosphorylation	37/1569	347/28814	7.9843310401405e-05	0.000752095468513235	0.00054374495034641	Ppia/Hsp90ab1/Hsp90b1/Rock1/Rock2/Ppp1r2/Calm1/Arpp19/Uri1/Ywhae/Bod1l/Camta1/Ppp4r2/Ppp1r12a/Calm2/Pin1/Calm3/Gnai2/Ppp4r3b/Ppp2r2d/Ptpra/Ptpn2/Ppm1g/Ppp4r3a/Ppp1cb/Ppp1ca/Ublcp1/Ptp4a2/Ppp3cb/Ppp2ca/Acp1/Ctdspl2/Mprip/Ssu72/Ppp4c/Bag4/Ensa	37
GO:1903715	GO:1903715	regulation of aerobic respiration	9/1569	35/28814	8.00028204631475e-05	0.000752254684390558	0.000543860059176252	Cox7a2/Uqcc2/Park7/Cox7a2l/Vcp/Dnajc15/Rhoa/Slc25a33/Hif1a	9
GO:0043281	GO:0043281	regulation of cysteine-type endopeptidase activity involved in apoptotic process	26/1569	210/28814	8.1752250074156e-05	0.000766025780100914	0.000553816193825016	Rack1/Casp8ap2/Hmgb1/Anp32b/Arl6ip1/Pdcd5/Park7/Rnf34/Hspd1/Vcp/Cycs/Usp47/Csnk2a1/Lamtor5/Pak2/Rhoa/Rnf7/Cyct/Mtch2/Fnip1/Ppp2ca/Fam162a/Mdm2/Sirt1/App/Bcap31	26
GO:0016572	GO:0016572	histone phosphorylation	10/1569	43/28814	8.18698131676428e-05	0.000766025780100914	0.000553816193825016	H3f3a/Smarca5/Fmr1/Ube2b/Slk/Ppp4r2/Ppp4r3b/Akap8l/Baz1b/Ppp4c	10
GO:1903828	GO:1903828	negative regulation of protein localization	27/1569	222/28814	8.19030407539177e-05	0.000766025780100914	0.000553816193825016	Btf3/Dnaja1/Rock2/Park7/Sumo1/Naca/Eny2/Erlec1/Snx3/Tmem59/Hectd1/Vps35/Lztfl1/Cltc/Pkig/Ndfip1/Ap2m1/Maged1/Nsfl1c/Ctnna1/Gdi2/Ppp2ca/Commd1/Sirt1/App/Ufm1/Bag4	27
GO:0045722	GO:0045722	positive regulation of gluconeogenesis	7/1569	21/28814	8.28223806118779e-05	0.000771887027787378	0.000558053719465936	Arpp19/Ppp4r3b/Ptpn2/Ppp4r3a/Hif1a/Ddb1/Sirt1	7
GO:0051204	GO:0051204	protein insertion into mitochondrial membrane	7/1569	21/28814	8.28223806118779e-05	0.000771887027787378	0.000558053719465936	Hsp90aa1/Pdcd5/Hspa4/Tomm22/Timm13/Romo1/Sh3glb1	7
GO:0035967	GO:0035967	cellular response to topologically incorrect protein	17/1569	109/28814	8.29731428865474e-05	0.000771928269358972	0.000558083536021463	Hspa8/Pdia6/Dnajc3/Hspa5/Eif2s1/Cul3/Tmed2/Hspd1/Vcp/Hspa9/Hspa2/Ptpn2/Dnajc10/Qrich1/Tmbim6/Ep300/Stub1	17
GO:0007135	GO:0007135	meiosis II	6/1569	15/28814	8.43770150959949e-05	0.000776769205290355	0.000561583403495526	Dazl/Hormad1/Bub1/Sycp3/Stag3/Sgo2a	6
GO:0031453	GO:0031453	positive regulation of heterochromatin assembly	6/1569	15/28814	8.43770150959949e-05	0.000776769205290355	0.000561583403495526	Mphosph8/Tpr/Setdb1/Pphln1/Atf7ip2/Trim28	6
GO:0048102	GO:0048102	autophagic cell death	6/1569	15/28814	8.43770150959949e-05	0.000776769205290355	0.000561583403495526	Atp6v0c/Calm1/Calm2/Sh3glb1/Calm3/Lamp1	6
GO:0061983	GO:0061983	meiosis II cell cycle process	6/1569	15/28814	8.43770150959949e-05	0.000776769205290355	0.000561583403495526	Dazl/Hormad1/Bub1/Sycp3/Stag3/Sgo2a	6
GO:0120263	GO:0120263	positive regulation of heterochromatin organization	6/1569	15/28814	8.43770150959949e-05	0.000776769205290355	0.000561583403495526	Mphosph8/Tpr/Setdb1/Pphln1/Atf7ip2/Trim28	6
GO:1905269	GO:1905269	positive regulation of chromatin organization	6/1569	15/28814	8.43770150959949e-05	0.000776769205290355	0.000561583403495526	Mphosph8/Tpr/Setdb1/Pphln1/Atf7ip2/Trim28	6
GO:0033143	GO:0033143	regulation of intracellular steroid hormone receptor signaling pathway	14/1569	79/28814	8.45322690778641e-05	0.000776842716699884	0.0005616365502826	Calr/Ddx5/Park7/Hdac1/Smarca4/Rhoa/Strn3/Pak1/Parp1/Phb2/Ncor1/Ep300/Sirt1/Ufm1	14
GO:1901988	GO:1901988	negative regulation of cell cycle phase transition	29/1569	247/28814	8.61470870325135e-05	0.000790305885385233	0.00057137006191084	Hormad1/Tpr/Bub1/Tipin/Atr/Topbp1/Nae1/Nabp1/Usp47/Nek1/Taok1/Rad17/Cdc5l/Ezh2/Cenpe/Brd7/Cdk1/Gigyf2/Atf2/Ddx39b/Dtl/Ik/Clspn/Thoc1/Tex14/Apc/Mdm2/Zfp207/Cdc73	29
GO:0034620	GO:0034620	cellular response to unfolded protein	15/1569	89/28814	8.69128313481229e-05	0.000795946502363452	0.000575448077438321	Hspa8/Pdia6/Dnajc3/Hspa5/Eif2s1/Tmed2/Hspd1/Hspa9/Hspa2/Ptpn2/Dnajc10/Qrich1/Tmbim6/Ep300/Stub1	15
GO:0045070	GO:0045070	positive regulation of viral genome replication	8/1569	28/28814	8.85427548879287e-05	0.000809467993126212	0.000585223754371916	Ppia/Top2a/Fkbp6/Pkn2/Top2b/Adarb1/Srpk1/Ddb1	8
GO:0062197	GO:0062197	cellular response to chemical stress	36/1569	336/28814	8.97913460504994e-05	0.000819462543972983	0.000592449547880094	Ppia/Rack1/Prdx1/Dnaja1/Cfl1/Sod1/Eif2s1/Sfpq/Park7/Rwdd1/Chchd2/Stk25/Sod2/Pdcd10/Ezh2/Romo1/Atp2a2/Chd6/Akr1b3/Atf2/Fbxw7/Rnf7/Ctnnb1/Parp1/P4hb/Hif1a/Mapkap1/Prdx5/Hdac2/Chuk/Setx/Sirt1/Pnpla8/App/Dhfr/Fut8	36
GO:0019083	GO:0019083	viral transcription	11/1569	52/28814	9.20782450214972e-05	0.000838882111378925	0.000606489376807352	Hdac1/Smarca4/Nucks1/Pfn1/Larp7/Rrp1b/Taf11/Tardbp/Psmc3/Gtf2b/Ep300	11
GO:0000056	GO:0000056	ribosomal small subunit export from nucleus	5/1569	10/28814	9.519688547331e-05	0.00086282400493421	0.000623798726839939	Npm1/Ran/Nup88/Xpo1/Ltv1	5
GO:0006607	GO:0006607	NLS-bearing protein import into nucleus	5/1569	10/28814	9.519688547331e-05	0.00086282400493421	0.000623798726839939	Ranbp2/Kpna4/Nup54/Kpna3/Kpna2	5
GO:1902415	GO:1902415	regulation of mRNA binding	5/1569	10/28814	9.519688547331e-05	0.00086282400493421	0.000623798726839939	Fmr1/Eif3e/Eif3d/Hnrnpl/Eif4g1	5
GO:1901215	GO:1901215	negative regulation of neuron death	30/1569	261/28814	9.6778011580725e-05	0.000875650104782718	0.000633071654702477	Npm1/Rack1/Hsp90ab1/Fmr1/Rock1/Sod1/Kras/Gclm/Park7/Hspd1/Sod2/Cited1/Set/Pdpk1/Mdk/Pin1/Vps35/Alg13/Rhoa/Ube2v2/Btbd10/Ctnnb1/Chmp4b/Hif1a/Gclc/Kdm2b/Sirt1/Hdgf/Adnp/App	30
GO:1990542	GO:1990542	mitochondrial transmembrane transport	14/1569	80/28814	9.73863737083509e-05	0.000879645755670464	0.000635960403650605	Tomm7/Slc25a31/Tomm20/Mpc2/Dnajc19/Hspd1/Smdt1/Mpc1/Dnajc15/Romo1/Slc25a33/Timm23/Timm17b/Mrpl18	14
GO:0043244	GO:0043244	regulation of protein-containing complex disassembly	19/1569	132/28814	9.94766383836103e-05	0.000896990200809478	0.000648499974563779	Mphosph8/Eif5a/Cfl1/Etf1/Gspt1/Arpc2/Taok1/Hdgfl3/Sptan1/Tpx2/Cfl2/Mtpn/Capza2/Add3/Eml4/Apc/Rdx/Setx/Oga	19
GO:0022616	GO:0022616	DNA strand elongation	9/1569	36/28814	0.000101544113089862	0.000912513111667844	0.0006597226248087	Pcna/Rad50/Lig1/Nucks1/Lig3/Yy1/Pole3/Pole/Ruvbl1	9
GO:1902110	GO:1902110	positive regulation of mitochondrial membrane permeability involved in apoptotic process	9/1569	36/28814	0.000101544113089862	0.000912513111667844	0.0006597226248087	Slc25a31/Siva1/Vdac2/Sh3glb1/Atf2/Chchd10/Bnip3l/Gclc/Atpif1	9
GO:0046931	GO:0046931	pore complex assembly	7/1569	22/28814	0.000115774565605212	0.00103510310774151	0.000748351920049389	Cct3/Cct8/Atp5g1/Rtn4/Atp5g3/Nup153/Afdn	7
GO:0051383	GO:0051383	kinetochore organization	7/1569	22/28814	0.000115774565605212	0.00103510310774151	0.000748351920049389	Smc4/Cenpw/Senp6/Rnf4/Cenpe/Smc2/Cenpk	7
GO:1902254	GO:1902254	negative regulation of intrinsic apoptotic signaling pathway by p53 class mediator	7/1569	22/28814	0.000115774565605212	0.00103510310774151	0.000748351920049389	Kdm1a/Mif/Atad5/Sh3glb1/Pttg1ip/Mdm2/Sirt1	7
GO:0006301	GO:0006301	postreplication repair	8/1569	29/28814	0.000116460501511202	0.00103596820484248	0.00074897736216399	Ube2b/Pcna/Vcp/Ube2n/Ube2v2/Rev3l/Dtl/Rad18	8
GO:0006891	GO:0006891	intra-Golgi vesicle-mediated transport	8/1569	29/28814	0.000116460501511202	0.00103596820484248	0.00074897736216399	Copb2/Rab6a/Copb1/Gabarapl2/Cux1/Vti1b/Copa/Copg2	8
GO:0019068	GO:0019068	virion assembly	8/1569	29/28814	0.000116460501511202	0.00103596820484248	0.00074897736216399	Ddx6/Vps4b/Tsg101/Chmp4b/Spcs1/Nedd4/Snf8/Rab1a	8
GO:1901652	GO:1901652	response to peptide	42/1569	420/28814	0.000117688676311742	0.00104513092179198	0.000755601761966046	Cacybp/Rock1/Srsf3/Ybx1/Rock2/Cfl1/Hnrnpk/Cyc1/Eprs/Syap1/Cited1/Smarcc1/Atp2b1/Srsf5/Nucks1/Atp2a2/Gnai2/Ptk2/Rab10/Rac1/Slc25a33/Uchl3/Eif2b3/Pak1/Ptpra/Ctnnb1/Ptpn2/Parp1/Appl1/Hadha/Zfp106/Jak1/Pkm/Chuk/Apc/Mdm2/Sirt1/Ahcyl1/App/Trim41/Osbpl8/Rbp4	42
GO:0061458	GO:0061458	reproductive system development	47/1569	488/28814	0.000118027244121641	0.0010463759878011	0.000756501911459894	Tex15/H3f3b/Prdx4/Eif2s2/Hsp90ab1/Brca2/Kdm5b/Sod1/Dnajc19/Hmgb2/Nipbl/Dmc1/Arid4b/Tmed2/Sycp2/Hnrnpk/Pbrm1/Spint2/Ndufs6/Cited1/Ash1l/Ube3a/Ctsl/Tiparp/Senp2/Tex11/Bptf/Hectd1/Akap9/Rac1/Tmf1/Taf10/Ctnnb1/Scaper/Birc6/Hif1a/Trim28/Apc/Plk4/Ube2q1/Sirt1/Lrp6/Brip1/Setd2/Dazap1/Rbp4/Jmjd1c	47
GO:0001558	GO:0001558	regulation of cell growth	45/1569	461/28814	0.000120081997605983	0.00106280627075765	0.000768380567514086	Npm1/H3f3b/H3f3a/Rack1/Pafah1b1/Cirbp/Eif4g2/Cfl1/Cdc42/Atp5g1/Uri1/Tomm70a/Hnrnpk/Caprin2/Golga4/Dnajc2/Dcun1d5/Rtn4/Usp47/Csnk2a1/Rbbp7/Sh3glb1/Pin1/Macf1/Hdgfl2/Smarca4/Itsn2/Ptk2/Tsg101/Rhoa/Slc25a33/Mtpn/Ddx39b/Pak1/Yy1/Lamtor2/Ndufs3/Wdr36/Afdn/Rab11a/Kdm2b/Sirt1/Adnp/Eif4g1/Cdc73	45
GO:0006612	GO:0006612	protein targeting to membrane	18/1569	123/28814	0.00012097213661529	0.00106889115686039	0.000772779777761078	Sec62/Srp9/Arl6ip1/Hspa5/Naca/Sec61b/Srp19/Arpc2/Srp14/Sec61g/Sec63/Macf1/Pikfyve/Pak1/Ssr3/Chmp4b/Vps37a/Oga	18
GO:0031063	GO:0031063	regulation of histone deacetylation	10/1569	45/28814	0.000123339612719918	0.00108798738645078	0.00078658584207756	Smarca5/Kdm5a/Nipbl/Baz2a/Akap8l/Sgf29/Ncor1/Dr1/Sirt1/BC004004	10
GO:0036473	GO:0036473	cell death in response to oxidative stress	16/1569	102/28814	0.000123909513439585	0.00109118978863741	0.000788901093386551	Ppia/Rack1/Sod1/Sfpq/Park7/Stk25/Sod2/Pdcd10/Fbxw7/Rnf7/Ctnnb1/Parp1/P4hb/Hif1a/Sirt1/App	16
GO:1900182	GO:1900182	positive regulation of protein localization to nucleus	15/1569	92/28814	0.000128040798105726	0.00112569201667951	0.000813845283398326	Npm1/Tpr/Hsp90ab1/Ran/Cd2ap/Park7/Lamtor5/Nmd3/Cdk1/Larp7/Parp1/Ubr5/Tardbp/Trim28/Hnrnpm	15
GO:0043518	GO:0043518	negative regulation of DNA damage response, signal transduction by p53 class mediator	6/1569	16/28814	0.000128782751738278	0.00112845351398574	0.000815841772246512	Kdm1a/Mif/Senp2/Pttg1ip/Mdm2/Sirt1	6
GO:0044794	GO:0044794	positive regulation by host of viral process	6/1569	16/28814	0.000128782751738278	0.00112845351398574	0.000815841772246512	Hspa8/Cfl1/Vapa/Ythdc2/Nucks1/Ppib	6
GO:0046605	GO:0046605	regulation of centrosome cycle	11/1569	54/28814	0.000132029137557751	0.00115498126138829	0.000835020625594365	Npm1/Rock2/Trim37/Vps4b/Alms1/Xpo1/Chmp4b/Cep295/Chordc1/Plk4/Sirt1	11
GO:0120032	GO:0120032	regulation of plasma membrane bounded cell projection assembly	25/1569	205/28814	0.000141387904950558	0.0012348033089639	0.000892729835545264	Dynll1/Fmr1/Cfl1/Cdc42/Ccp110/Vdac3/Ccdc88a/Arpc2/Fxr1/Brk1/Rala/Cyld/Fnbp1l/Pfn1/Rac1/Auts2/Ift88/Ift20/Akirin1/Fxr2/Gdi2/Rab5a/Apc/Rdx/Odf2l	25
GO:0061640	GO:0061640	cytoskeleton-dependent cytokinesis	15/1569	93/28814	0.000145078533775428	0.0012649409349841	0.00091451853478621	Rock1/Stmn1/Rock2/Cfl1/Son/Kif23/Arf1/Vps4b/Rhoa/Spast/Kif20b/Usp8/Chmp4b/Apc/Dctn3	15
GO:0007093	GO:0007093	mitotic cell cycle checkpoint signaling	19/1569	136/28814	0.000148841055033608	0.00129560489323809	0.000936687758184404	Tpr/Bub1/Tipin/Topbp1/Nae1/Nabp1/Taok1/Rad17/Cenpe/Cdk1/Gigyf2/Atf2/Dtl/Ik/Clspn/Tex14/Apc/Mdm2/Zfp207	19
GO:0060261	GO:0060261	positive regulation of transcription initiation from RNA polymerase II promoter	10/1569	46/28814	0.000149970473640095	0.00130328541754777	0.000942240572267515	Sub1/Gtf2a2/Dhx36/Psmc6/Med13/Taf4b/Taf7/Taf10/Taf11/Med4	10
GO:0016556	GO:0016556	mRNA modification	8/1569	30/28814	0.000151265480885067	0.00130807444535857	0.000945702911555817	Hnrnpab/Hnrnpc/Zc3h13/Syncrip/Adarb1/Dnajb11/Cbll1/Mettl16	8
GO:0031445	GO:0031445	regulation of heterochromatin assembly	8/1569	30/28814	0.000151265480885067	0.00130807444535857	0.000945702911555817	Mphosph8/Tpr/Kdm1a/Setdb1/Pphln1/Atf7ip2/Ctr9/Trim28	8
GO:0120261	GO:0120261	regulation of heterochromatin organization	8/1569	30/28814	0.000151265480885067	0.00130807444535857	0.000945702911555817	Mphosph8/Tpr/Kdm1a/Setdb1/Pphln1/Atf7ip2/Ctr9/Trim28	8
GO:0043968	GO:0043968	histone H2A acetylation	7/1569	23/28814	0.000158625739416746	0.0013672398291231	0.000988477904896579	Actb/Morf4l1/Mrgbp/Ep400/Mbtd1/Morf4l2/Ruvbl1	7
GO:0044346	GO:0044346	fibroblast apoptotic process	7/1569	23/28814	0.000158625739416746	0.0013672398291231	0.000988477904896579	Ier3ip1/Cul3/Stk17b/Chd8/Sirt1/Cfdp1/Ruvbl1	7
GO:0071453	GO:0071453	cellular response to oxygen levels	20/1569	148/28814	0.000160255768451858	0.00137903618039731	0.000997006352023835	Rock2/Higd1a/Atp6v1g1/Gnb1/Chchd2/Rtn4/Atf2/Ndufs4/P4hb/Tmem199/Pdk3/Hif1a/Bnip3l/Tmbim6/Usp19/Fam162a/Commd1/Sirt1/Ccdc115/Stub1	20
GO:0090257	GO:0090257	regulation of muscle system process	29/1569	256/28814	0.000161631316399316	0.001388607807828	0.00100392638318999	Rock1/Rock2/Sod1/Calm1/Sumo1/Tomm70a/Atp2b1/Jarid2/Grcc10/Calm2/Pin1/Calm3/Atp2a2/Akap9/Ptk2/Rhoa/Mtpn/Ddx39b/Ndufs4/Pak1/Yy1/Parp1/Setd3/Glrx3/Mef2a/Adk/Sirt1/Becn1/Oga	29
GO:0043966	GO:0043966	histone H3 acetylation	13/1569	74/28814	0.000164290523367879	0.001406870959035	0.0010171301540701	Brca2/Eny2/Kmt2a/Smarca4/Taf7/Zfp451/Taf10/Sgf29/Pole3/Dr1/Ep300/Sirt1/Jade3	13
GO:0046824	GO:0046824	positive regulation of nucleocytoplasmic transport	13/1569	74/28814	0.000164290523367879	0.001406870959035	0.0010171301540701	Tpr/Hsp90ab1/Anp32b/Ran/Ywhae/Khdrbs1/Cdk1/Ubr5/Nedd4/Tardbp/Trim28/Mdm2/Ctdspl2	13
GO:0071375	GO:0071375	cellular response to peptide hormone stimulus	30/1569	269/28814	0.000166092994790376	0.00142000088738936	0.00102662274183321	Rock1/Srsf3/Ybx1/Rock2/Cfl1/Hnrnpk/Eprs/Syap1/Smarcc1/Atp2b1/Nucks1/Gnai2/Ptk2/Rab10/Rac1/Slc25a33/Uchl3/Pak1/Ptpra/Ctnnb1/Ptpn2/Parp1/Appl1/Zfp106/Jak1/Pkm/Apc/Sirt1/Ahcyl1/Osbpl8	30
GO:0031055	GO:0031055	chromatin remodeling at centromere	5/1569	11/28814	0.000166685215889974	0.00142084833211856	0.00102723542175416	H3f3b/Nasp/H3f3a/Hells/Cenpp	5
GO:0032272	GO:0032272	negative regulation of protein polymerization	14/1569	84/28814	0.000167269538245616	0.00142084833211856	0.00102723542175416	Mphosph8/Stmn1/Cfl1/Arpc2/Vdac2/Sptan1/Pfn1/Mtpn/Mapre1/Capza2/Add3/Tmsb15b2/Rdx/Tmsb4x	14
GO:0042147	GO:0042147	retrograde transport, endosome to Golgi	14/1569	84/28814	0.000167269538245616	0.00142084833211856	0.00102723542175416	Vps29/Snx3/Vamp3/Vps35/Rab6a/Gbf1/Cltc/Pikfyve/Spag9/Vti1b/Usp7/Gcc2/Evi5/Arl1	14
GO:0072332	GO:0072332	intrinsic apoptotic signaling pathway by p53 class mediator	14/1569	84/28814	0.000167269538245616	0.00142084833211856	0.00102723542175416	Ddx5/Hint1/Brca2/Kdm1a/Mif/Hnrnpk/Atad5/Sh3glb1/Pttg1ip/Mdm2/Ep300/Sirt1/Topors/Ppp1r13b	14
GO:0090407	GO:0090407	organophosphate biosynthetic process	46/1569	482/28814	0.000171004733847653	0.00145024111100702	0.00104848561639879	Atp5g2/Atp5j/Atp5e/Atp5l/Atp5b/Atp5h/Vapa/Mpc2/Atp5j2/Pigp/Nme2/Atp5g1/Atp5d/Dpm1/Ndufc2/Mpc1/Vcp/Impdh2/Atp5a1/Atp5o/Atp5g3/Pik3c2a/Adss/Pigf/Sh3glb1/Agpat5/Atp5c1/Dut/Etnk1/Parp1/Idi1/Cmpk1/Sptlc2/Serinc1/Dld/Pip5k1a/Gmps/Pkm/Pdk3/Nme1/Far1/Adk/Atp5k/Ak2/Becn1/Hprt	46
GO:0060491	GO:0060491	regulation of cell projection assembly	25/1569	208/28814	0.000177931270795279	0.00150656092045762	0.00108920333545881	Dynll1/Fmr1/Cfl1/Cdc42/Ccp110/Vdac3/Ccdc88a/Arpc2/Fxr1/Brk1/Rala/Cyld/Fnbp1l/Pfn1/Rac1/Auts2/Ift88/Ift20/Akirin1/Fxr2/Gdi2/Rab5a/Apc/Rdx/Odf2l	25
GO:0043523	GO:0043523	regulation of neuron apoptotic process	31/1569	283/28814	0.000180489947461596	0.00152577639881397	0.00110309561345034	Npm1/Hsp90ab1/Fmr1/Rock1/Sod1/Kras/Cdc42/Gclm/Park7/Hspd1/Nae1/Sod2/Cited1/Set/Pdpk1/Ube2m/Mdk/Pin1/Rhoa/Ube2v2/Atf2/Fbxw7/Ctnnb1/Parp1/Hif1a/Gclc/Kdm2b/Sirt1/Hdgf/Adnp/App	31
GO:0045927	GO:0045927	positive regulation of growth	34/1569	322/28814	0.000183467797311059	0.00154846820930534	0.00111950118679236	H3f3b/H3f3a/Pafah1b1/Eif4g2/Cfl1/Nipbl/Cdc42/Atp5g1/Hnrnpk/Naca/Golga4/Rtn4/Usp47/Csnk2a1/Sh3glb1/Pin1/Macf1/Hdgfl2/Itsn2/Ptk2/Rhoa/Cdk1/Slc25a33/Mtpn/Ddx39b/Pak1/Ppib/Celf1/Afdn/Rab11a/Kdm2b/Sirt1/Adnp/Eif4g1	34
GO:0060998	GO:0060998	regulation of dendritic spine development	14/1569	85/28814	0.000190346421621816	0.00160139932066201	0.00115776896757465	Pafah1b1/Fmr1/Cfl1/Hnrnpk/Pbrm1/Caprin2/Dhx36/Caprin1/Ube3a/Arf1/Tanc2/Rac1/Afdn/Hdac2	14
GO:1902117	GO:1902117	positive regulation of organelle assembly	14/1569	85/28814	0.000190346421621816	0.00160139932066201	0.00115776896757465	Dynll1/Ccp110/Ccdc88a/Arpc2/Sh3glb1/Vps4b/Rhoa/Dync1h1/G3bp1/Cep295/Cnot6l/Plk4/G3bp2/Becn1	14
GO:0032271	GO:0032271	regulation of protein polymerization	25/1569	209/28814	0.000191852593728008	0.00161150068776313	0.0011650719863838	Mphosph8/Hsp90aa1/Stmn1/Ckap5/Cfl1/Arpc1a/Arpc2/Rasa1/Vdac2/Sptan1/Arpc5l/Akap9/Pfn1/Rhoa/Rac1/Mtpn/Mapre1/Pak1/Capza2/Add3/Tmsb15b2/Apc/Rdx/Tmsb4x/Bag4	25
GO:0007097	GO:0007097	nuclear migration	8/1569	31/28814	0.000194201288527057	0.00162605047139718	0.00117559109161826	Pafah1b1/Cdc42/Nudc/Pcm1/Cdc42bpa/Ptk2/Dync1h1/Tacc1	8
GO:0071763	GO:0071763	nuclear membrane organization	8/1569	31/28814	0.000194201288527057	0.00162605047139718	0.00117559109161826	Pafah1b1/Banf1/Akap8l/Spast/Chmp4b/Nsfl1c/Tardbp/Ubxn2a	8
GO:0072665	GO:0072665	protein localization to vacuole	12/1569	66/28814	0.000207544919997457	0.0017322776154851	0.00125239048159691	Hspa8/Rock2/Rtn4/Lamtor5/Sh3glb1/Vps13a/Zfyve16/Vps37a/Gcc2/Nedd4/Snf8/Lamp2	12
GO:0090311	GO:0090311	regulation of protein deacetylation	12/1569	66/28814	0.000207544919997457	0.0017322776154851	0.00125239048159691	Smarca5/Kdm5a/Nipbl/Baz2a/Akap8l/Sgf29/Ncor1/Hdac2/Dr1/Ep300/Sirt1/BC004004	12
GO:0051701	GO:0051701	biological process involved in interaction with host	20/1569	151/28814	0.000210859592149762	0.00175716326791468	0.00127038214410674	Vapa/Bsg/Alyref/Tcp1/Snx3/Rad50/Ctsl/Thoc2/Vps4b/Tsg101/Thoc7/Ddx39b/Eps15/Pikfyve/Chmp4b/Dynlt1b/P4hb/Thoc1/Thoc3/Ddb1	20
GO:0007080	GO:0007080	mitotic metaphase plate congression	10/1569	48/28814	0.00021791687466272	0.00181310964328998	0.00131082988029725	Hnrnpu/Nudc/Cul3/Cdca8/Cenpe/Vps4b/Chmp4b/Eml4/Rab11a/Becn1	10
GO:0031648	GO:0031648	protein destabilization	11/1569	57/28814	0.000219074485931142	0.00181950537928888	0.0013154538267226	Npm1/Serf2/Cul3/Senp2/Vps35/Fbxw7/Mdm2/Commd1/Ep300/Sirt1/Cdc73	11
GO:0071456	GO:0071456	cellular response to hypoxia	16/1569	107/28814	0.000219375435303835	0.00181950537928888	0.0013154538267226	Rock2/Higd1a/Gnb1/Chchd2/Rtn4/Atf2/P4hb/Pdk3/Hif1a/Bnip3l/Tmbim6/Usp19/Fam162a/Commd1/Sirt1/Stub1	16
GO:0031333	GO:0031333	negative regulation of protein-containing complex assembly	20/1569	152/28814	0.000230594569310587	0.00190955471446365	0.00138055709264192	Mphosph8/Hmgb1/Stmn1/Cfl1/Cdc42/Arpc2/Vdac2/Dnajc15/Sptan1/Vps35/Pfn1/Mtpn/Mapre1/Capza2/Add3/Tmsb15b2/Rdx/Ep300/Tmsb4x/Lamp2	20
GO:1901653	GO:1901653	cellular response to peptide	33/1569	313/28814	0.000232754631018177	0.00192442112636502	0.00139130511166285	Rock1/Srsf3/Ybx1/Rock2/Cfl1/Hnrnpk/Eprs/Syap1/Smarcc1/Atp2b1/Nucks1/Gnai2/Ptk2/Rab10/Rac1/Slc25a33/Uchl3/Pak1/Ptpra/Ctnnb1/Ptpn2/Parp1/Appl1/Zfp106/Jak1/Pkm/Apc/Mdm2/Sirt1/Ahcyl1/App/Trim41/Osbpl8	33
GO:0006611	GO:0006611	protein export from nucleus	12/1569	67/28814	0.000240445215667854	0.00198179455101239	0.0014327845663892	Calr/Tpr/Anp32b/Ran/Park7/Ywhae/Hspa9/Xpo1/Mdm2/Ctdspl2/Ahcyl1/Nxt1	12
GO:0032387	GO:0032387	negative regulation of intracellular transport	12/1569	67/28814	0.000240445215667854	0.00198179455101239	0.0014327845663892	Tpr/Park7/Sumo1/Erlec1/Snx3/Sar1a/Vps35/Nup153/Pkig/Ppp2ca/Ufm1/Bag4	12
GO:0051567	GO:0051567	histone H3-K9 methylation	9/1569	40/28814	0.00024227218808723	0.00199373758527322	0.00144141906140083	Rif1/Kdm1a/Arid4b/Setdb1/Jarid2/Baz2a/Prdm9/Kdm3a/Sirt1	9
GO:0051494	GO:0051494	negative regulation of cytoskeleton organization	22/1569	176/28814	0.000243092538089772	0.00199737248975631	0.00144404700032669	Npm1/Mphosph8/Stmn1/Cfl1/Arpc2/Taok1/Hdgfl3/Trim37/Sptan1/Tpx2/Pak2/Pfn1/Mtpn/Mapre1/Capza2/Add3/Eml4/Tmsb15b2/Apc/Tjp1/Rdx/Tmsb4x	22
GO:0070536	GO:0070536	protein K63-linked deubiquitination	8/1569	32/28814	0.000246652323316888	0.00202032764828662	0.00146064296727212	Usp16/Vcp/Cyld/Psmd14/Otud4/Usp8/Usp7/Zranb1	8
GO:1902751	GO:1902751	positive regulation of cell cycle G2/M phase transition	8/1569	32/28814	0.000246652323316888	0.00202032764828662	0.00146064296727212	Npm1/Atad5/Vps4b/Cdk1/Hspa2/Dtl/Rab11a/App	8
GO:0051702	GO:0051702	biological process involved in interaction with symbiont	17/1569	119/28814	0.000248168042442399	0.00202959135485838	0.00146734037987566	Hspa8/Fmr1/Cfl1/Vapa/Hspd1/Ythdc2/Hdac1/Romo1/Smarca4/Nucks1/Ppib/Rrp1b/Taf11/Tardbp/Psmc3/Ddb1/Ep300	17
GO:0018023	GO:0018023	peptidyl-lysine trimethylation	11/1569	58/28814	0.000257187342968238	0.00209361610209484	0.00151362856331047	Arid4b/Setdb1/Iws1/Kmt2a/Prdm9/Kmt2e/Setd3/Ctr9/Sirt1/Kmt5b/Setd2	11
GO:0071103	GO:0071103	DNA conformation change	11/1569	58/28814	0.000257187342968238	0.00209361610209484	0.00151362856331047	Hmgb1/Hnrnpa2b1/Top2a/Top1/Dhx36/Top2b/Rad50/Ascc3/Pura/Mcm5/Mcm8	11
GO:1904591	GO:1904591	positive regulation of protein import	11/1569	58/28814	0.000257187342968238	0.00209361610209484	0.00151362856331047	Tpr/Hsp90ab1/Ran/Pdcd5/Tomm70a/Cdk1/Ubr5/Tardbp/Trim28/App/Hnrnpm	11
GO:0051258	GO:0051258	protein polymerization	30/1569	276/28814	0.000260082669907595	0.00211392308746158	0.00152830997173825	Mphosph8/Hsp90aa1/Ube2s/Stmn1/Ckap5/Cfl1/Arpc1a/Ube2k/Arpc2/Rasa1/Vdac2/Hdgfl3/Sptan1/Tpx2/Arpc5l/Akap9/Pfn1/Rhoa/Rac1/Mtpn/Mapre1/Pak1/Capza2/Add3/Chmp4b/Tmsb15b2/Apc/Rdx/Tmsb4x/Bag4	30
GO:0006614	GO:0006614	SRP-dependent cotranslational protein targeting to membrane	6/1569	18/28814	0.000271706869675133	0.0021948755551858	0.00158683644528574	Srp9/Sec61b/Srp19/Srp14/Sec63/Ssr3	6
GO:0031145	GO:0031145	anaphase-promoting complex-dependent catabolic process	6/1569	18/28814	0.000271706869675133	0.0021948755551858	0.00158683644528574	Ube2s/Cul3/Anapc5/Anapc10/Cdc20/Anapc11	6
GO:0090308	GO:0090308	regulation of DNA methylation-dependent heterochromatin assembly	6/1569	18/28814	0.000271706869675133	0.0021948755551858	0.00158683644528574	Mphosph8/Kdm1a/Setdb1/Pphln1/Atf7ip2/Trim28	6
GO:1900363	GO:1900363	regulation of mRNA polyadenylation	6/1569	18/28814	0.000271706869675133	0.0021948755551858	0.00158683644528574	Ythdc1/Nudt21/Zc3h14/Rnf20/Ctr9/Nelfe	6
GO:0090309	GO:0090309	positive regulation of DNA methylation-dependent heterochromatin assembly	5/1569	12/28814	0.000272924035032894	0.00220133682690905	0.00159150777229064	Mphosph8/Setdb1/Pphln1/Atf7ip2/Trim28	5
GO:0002082	GO:0002082	regulation of oxidative phosphorylation	7/1569	25/28814	0.00028259553203291	0.00227239547480732	0.0016428812781695	Cox7a2/Uqcc2/Cox7a2l/Vcp/Dnajc15/Rhoa/Slc25a33	7
GO:0018027	GO:0018027	peptidyl-lysine dimethylation	7/1569	25/28814	0.00028259553203291	0.00227239547480732	0.0016428812781695	Ash1l/Kmt2a/Prdm9/Setd3/Kdm3a/Kmt5b/Setd2	7
GO:0043524	GO:0043524	negative regulation of neuron apoptotic process	23/1569	190/28814	0.000285421717460408	0.00229162794460221	0.0016567858405176	Npm1/Hsp90ab1/Fmr1/Rock1/Sod1/Kras/Gclm/Park7/Hspd1/Sod2/Cited1/Set/Pdpk1/Mdk/Pin1/Rhoa/Ube2v2/Hif1a/Gclc/Kdm2b/Sirt1/Hdgf/Adnp	23
GO:0016358	GO:0016358	dendrite development	33/1569	317/28814	0.000293547635363499	0.00235328841419827	0.00170136471432084	Pafah1b1/Fmr1/Rock2/Arf4/Cfl1/Cdc42/Hnrnpk/Pbrm1/Caprin2/Dhx36/Uba6/Caprin1/Ube3a/Arf1/Ezh2/Sh3glb1/Tanc2/Pak2/Rhoa/Rac1/Srgap2/Pak1/Trappc4/Cyth2/Cdc20/Dynlt1b/Cux1/Mef2a/Nedd4/Afdn/Hdac2/App/Hprt	33
GO:0051445	GO:0051445	regulation of meiotic cell cycle	11/1569	59/28814	0.000300745225214774	0.00240733089986029	0.00174043598906338	Stra8/Dazl/Calr/Hormad1/Meioc/Ube2b/Ythdc2/Prdm9/Psma8/Cdc20/Topaz1	11
GO:0035305	GO:0035305	negative regulation of dephosphorylation	10/1569	50/28814	0.000309964388082759	0.00246390511917554	0.00178133763966535	Rock1/Rock2/Arpp19/Uri1/Ywhae/Bod1l/Gnai2/Mprip/Bag4/Ensa	10
GO:0010847	GO:0010847	regulation of chromatin assembly	8/1569	33/28814	0.000310148435854513	0.00246390511917554	0.00178133763966535	Mphosph8/Tpr/Kdm1a/Setdb1/Pphln1/Atf7ip2/Ctr9/Trim28	8
GO:0035520	GO:0035520	monoubiquitinated protein deubiquitination	8/1569	33/28814	0.000310148435854513	0.00246390511917554	0.00178133763966535	Eny2/Usp16/Usp47/Usp15/Taf7/Taf10/Sgf29/Usp7	8
GO:0097345	GO:0097345	mitochondrial outer membrane permeabilization	8/1569	33/28814	0.000310148435854513	0.00246390511917554	0.00178133763966535	Slc25a31/Siva1/Vdac2/Sh3glb1/Chchd10/Bnip3l/Gclc/Atpif1	8
GO:1902253	GO:1902253	regulation of intrinsic apoptotic signaling pathway by p53 class mediator	8/1569	33/28814	0.000310148435854513	0.00246390511917554	0.00178133763966535	Kdm1a/Mif/Hnrnpk/Atad5/Sh3glb1/Pttg1ip/Mdm2/Sirt1	8
GO:0051402	GO:0051402	neuron apoptotic process	33/1569	318/28814	0.000310799470008378	0.00246536421698375	0.00178239252843744	Npm1/Hsp90ab1/Fmr1/Rock1/Sod1/Kras/Cdc42/Gclm/Park7/Hspd1/Nae1/Sod2/Cited1/Set/Pdpk1/Ube2m/Mdk/Pin1/Rhoa/Ube2v2/Adarb1/Atf2/Fbxw7/Ctnnb1/Parp1/Hif1a/Fam162a/Gclc/Kdm2b/Sirt1/Hdgf/Adnp/App	33
GO:0032507	GO:0032507	maintenance of protein location in cell	12/1569	69/28814	0.00031968613467108	0.00252825241437773	0.0018278590166706	Hnrnpu/Hspa5/Park7/Ccdc88a/Pfn1/Vps13a/Kdelr2/Chchd10/Tmsb15b2/Topors/Mprip/Tmsb4x	12
GO:0033045	GO:0033045	regulation of sister chromatid segregation	12/1569	69/28814	0.00031968613467108	0.00252825241437773	0.0018278590166706	Tpr/Bub1/Hnrnpu/Cul3/Anapc5/Cenpe/Ik/Tex14/Apc/Anapc11/Zfp207/Becn1	12
GO:0009988	GO:0009988	cell-cell recognition	13/1569	79/28814	0.000321911894114514	0.00254204377463183	0.00183782980204362	Tex101/Ly6k/Ubap2l/Cct3/Cct8/Cct2/Cct4/Cct6a/Tcp1/Vdac2/Cct7/Cct5/Clgn	13
GO:0099175	GO:0099175	regulation of postsynapse organization	16/1569	111/28814	0.000336477532901536	0.00264913281500836	0.00191525232003498	Hspa8/Pafah1b1/Arf4/Cfl1/Hnrnpk/Caprin2/Dhx36/Caprin1/Ube3a/Rheb/Vps35/Tanc2/Cript/Chmp4b/Afdn/App	16
GO:1902749	GO:1902749	regulation of cell cycle G2/M phase transition	16/1569	111/28814	0.000336477532901536	0.00264913281500836	0.00191525232003498	Npm1/Cenpf/Topbp1/Nae1/Nabp1/Atad5/Usp47/Taok1/Rad17/Vps4b/Cdk1/Hspa2/Dtl/Clspn/Rab11a/App	16
GO:0048608	GO:0048608	reproductive structure development	45/1569	484/28814	0.000355154864854256	0.00279201477214039	0.00201855216152948	Tex15/H3f3b/Prdx4/Eif2s2/Hsp90ab1/Brca2/Kdm5b/Sod1/Dnajc19/Hmgb2/Nipbl/Dmc1/Arid4b/Tmed2/Sycp2/Hnrnpk/Pbrm1/Spint2/Cited1/Ash1l/Ube3a/Ctsl/Tiparp/Senp2/Tex11/Bptf/Hectd1/Akap9/Rac1/Tmf1/Taf10/Ctnnb1/Scaper/Birc6/Hif1a/Trim28/Apc/Plk4/Sirt1/Lrp6/Brip1/Setd2/Dazap1/Rbp4/Jmjd1c	45
GO:0007143	GO:0007143	female meiotic nuclear division	9/1569	42/28814	0.000358132967047519	0.00280706003146458	0.00202942948246369	Dazl/Top2a/Meioc/Sycp3/Sycp2/Stag3/Cenpe/Meiob/Sgo2a	9
GO:0051569	GO:0051569	regulation of histone H3-K4 methylation	9/1569	42/28814	0.000358132967047519	0.00280706003146458	0.00202942948246369	Kdm1a/Kmt2a/Prdm9/Auts2/Kmt2e/Ctnnb1/Ctr9/Nelfe/Phf20	9
GO:0001841	GO:0001841	neural tube formation	18/1569	134/28814	0.000359495901546977	0.0028135621374782	0.00203413033157067	Luzp1/Rock2/Cfl1/Tmed2/Spint2/Brd2/Rala/Hectd1/Pfn1/Gatad2a/Kif20b/Kdm2a/Hif1a/Enah/Cecr2/Kdm2b/Lrp6/Setd2	18
GO:1903201	GO:1903201	regulation of oxidative stress-induced cell death	13/1569	80/28814	0.00036547654732765	0.00285613153652349	0.00206490687090538	Ppia/Rack1/Sod1/Sfpq/Park7/Sod2/Fbxw7/Ctnnb1/Parp1/P4hb/Hif1a/Sirt1/App	13
GO:0043462	GO:0043462	regulation of ATP-dependent activity	12/1569	70/28814	0.000366956523119042	0.00286345511753394	0.00207020162450995	Hnrnpu/1810037I17Rik/Sumo1/Pfn1/Hspa2/Atp1b3/Dnajc9/Dnajb11/Dnajc10/Chtop/Sirt1/Atpif1	12
GO:0060765	GO:0060765	regulation of androgen receptor signaling pathway	7/1569	26/28814	0.000368633275795944	0.00286805387879587	0.00207352640616163	Ddx5/Park7/Hdac1/Smarca4/Ncor1/Ep300/Sirt1	7
GO:0071108	GO:0071108	protein K48-linked deubiquitination	7/1569	26/28814	0.000368633275795944	0.00286805387879587	0.00207352640616163	Ubxn1/Park7/Usp34/Usp37/Otud4/Usp8/Usp19	7
GO:0045945	GO:0045945	positive regulation of transcription by RNA polymerase III	6/1569	19/28814	0.000378872559704057	0.00293473238243598	0.00212173318464765	Smarca5/Dek/Sf3b1/Baz1b/Ddx21/Chd8	6
GO:0071786	GO:0071786	endoplasmic reticulum tubular network organization	6/1569	19/28814	0.000378872559704057	0.00293473238243598	0.00212173318464765	Arl6ip1/Rtn3/Rtn4/Lnpk/Rab10/Rab18	6
GO:1903214	GO:1903214	regulation of protein targeting to mitochondrion	6/1569	19/28814	0.000378872559704057	0.00293473238243598	0.00212173318464765	Tomm7/Pdcd5/Fbxw7/Bnip3l/Atpif1/Bag4	6
GO:0035308	GO:0035308	negative regulation of protein dephosphorylation	8/1569	34/28814	0.000386368615898571	0.00298403286803069	0.00215737611990525	Rock1/Rock2/Arpp19/Ywhae/Bod1l/Gnai2/Mprip/Ensa	8
GO:0044788	GO:0044788	modulation by host of viral process	8/1569	34/28814	0.000386368615898571	0.00298403286803069	0.00215737611990525	Hspa8/Fmr1/Cfl1/Vapa/Ythdc2/Nucks1/Ppib/Psmc3	8
GO:0045069	GO:0045069	regulation of viral genome replication	14/1569	91/28814	0.000394851309951129	0.00304508868419913	0.0022015178454185	Ppia/Ddx5/Mphosph8/Top2a/Fkbp6/Setdb1/Pkn2/Banf1/Top2b/Adarb1/Ilf3/Srpk1/Trim28/Ddb1	14
GO:1901880	GO:1901880	negative regulation of protein depolymerization	13/1569	81/28814	0.000413953659706369	0.00318774533569503	0.00230465479695148	Mphosph8/Cfl1/Arpc2/Taok1/Hdgfl3/Sptan1/Tpx2/Mtpn/Capza2/Add3/Eml4/Apc/Rdx	13
GO:1901991	GO:1901991	negative regulation of mitotic cell cycle phase transition	21/1569	171/28814	0.000423322215837554	0.00321069262250167	0.00232124507285079	Tpr/Bub1/Topbp1/Nae1/Nabp1/Usp47/Taok1/Rad17/Ezh2/Cenpe/Brd7/Cdk1/Gigyf2/Dtl/Ik/Clspn/Tex14/Apc/Mdm2/Zfp207/Cdc73	21
GO:1902806	GO:1902806	regulation of cell cycle G1/S phase transition	21/1569	171/28814	0.000423322215837554	0.00321069262250167	0.00232124507285079	Anp32b/Cirbp/Senp2/Ezh2/Ankrd17/Brd7/Gigyf2/Cul4b/Kmt2e/Larp7/Appl1/Dbf4/Mlf1/Phb2/Ppp2ca/Apc/Mdm2/Ccnh/Rdx/Eif4g1/Cdc73	21
GO:0001731	GO:0001731	formation of translation preinitiation complex	5/1569	13/28814	0.000423628827537661	0.00321069262250167	0.00232124507285079	Eif2s2/Eif2s3y/Eif5/Denr/Eif4b	5
GO:0006271	GO:0006271	DNA strand elongation involved in DNA replication	5/1569	13/28814	0.000423628827537661	0.00321069262250167	0.00232124507285079	Pcna/Lig1/Lig3/Pole3/Pole	5
GO:0034086	GO:0034086	maintenance of sister chromatid cohesion	5/1569	13/28814	0.000423628827537661	0.00321069262250167	0.00232124507285079	Nipbl/Smc5/Slf1/Sgo2a/Slf2	5
GO:0034244	GO:0034244	negative regulation of transcription elongation from RNA polymerase II promoter	5/1569	13/28814	0.000423628827537661	0.00321069262250167	0.00232124507285079	Hnrnpu/Ezh2/Supt4a/Eapp/Nelfe	5
GO:0045144	GO:0045144	meiotic sister chromatid segregation	5/1569	13/28814	0.000423628827537661	0.00321069262250167	0.00232124507285079	Hormad1/Bub1/Sycp3/Stag3/Sgo2a	5
GO:0051177	GO:0051177	meiotic sister chromatid cohesion	5/1569	13/28814	0.000423628827537661	0.00321069262250167	0.00232124507285079	Hormad1/Bub1/Sycp3/Stag3/Sgo2a	5
GO:0060213	GO:0060213	positive regulation of nuclear-transcribed mRNA poly(A) tail shortening	5/1569	13/28814	0.000423628827537661	0.00321069262250167	0.00232124507285079	Pabpc1/Tnrc6c/Eif4enif1/Polr2g/Tnrc6b	5
GO:0070932	GO:0070932	histone H3 deacetylation	5/1569	13/28814	0.000423628827537661	0.00321069262250167	0.00232124507285079	Sfpq/Hdac1/Hdac2/Sirt1/Smarcad1	5
GO:2000622	GO:2000622	regulation of nuclear-transcribed mRNA catabolic process, nonsense-mediated decay	5/1569	13/28814	0.000423628827537661	0.00321069262250167	0.00232124507285079	Hnrnpab/Rbm8a/Magoh/Syncrip/Casc3	5
GO:0018209	GO:0018209	peptidyl-serine modification	36/1569	364/28814	0.000428779034365076	0.00324506371058217	0.00234609445217046	H3f3a/Rack1/Hsp90ab1/Hsp90aa1/Wnk1/Rock1/Rock2/Atr/Park7/Pkn2/Mif/Top1/Caprin2/Nsd1/Pdcd10/Pdpk1/Csnk2a1/Hpf1/Csnk2a2/Pak2/Akap9/Csnk1a1/Cdk1/Mark3/Fnip1/Pikfyve/Pak1/Clspn/Parp1/Stk38/Pdk3/Mapkap1/Chuk/App/Eif4g1/Bag4	36
GO:0032781	GO:0032781	positive regulation of ATP-dependent activity	9/1569	43/28814	0.000431261448956898	0.00325606919948467	0.00235405112691104	Hnrnpu/Sumo1/Pfn1/Hspa2/Atp1b3/Dnajc9/Dnajb11/Dnajc10/Chtop	9
GO:0000086	GO:0000086	G2/M transition of mitotic cell cycle	18/1569	136/28814	0.00043146774795067	0.00325606919948467	0.00235405112691104	Cenpf/Calm1/Arpp19/Topbp1/Nae1/Nabp1/Usp47/Taok1/Rad17/Calm2/Vps4b/Calm3/Cdk1/Hspa2/Dtl/Clspn/Rab11a/App	18
GO:0006289	GO:0006289	nucleotide-excision repair	10/1569	52/28814	0.000432394864493272	0.00325840415743144	0.00235573923918665	Hmgb1/Brca2/Gtf2h5/Gtf2h1/Usp7/Commd1/Sirt1/Pole/Brip1/Rad23b	10
GO:1901214	GO:1901214	regulation of neuron death	38/1569	392/28814	0.000446365088590481	0.00335888137277431	0.00242838158414793	Npm1/Rack1/Hsp90ab1/Fmr1/Rock1/Sod1/Kras/Eif2s1/Cdc42/Gclm/Park7/Atp5g1/Hspd1/Nae1/Sod2/Cited1/Set/Pdpk1/Ube2m/Mdk/Pin1/Vps35/Alg13/Rhoa/Ube2v2/Btbd10/Atf2/Fbxw7/Ctnnb1/Parp1/Chmp4b/Hif1a/Gclc/Kdm2b/Sirt1/Hdgf/Adnp/App	38
GO:0051261	GO:0051261	protein depolymerization	17/1569	125/28814	0.000447498490507056	0.00336261330117482	0.00243107966877652	Mphosph8/Hspa8/Stmn1/Cfl1/Arpc2/Taok1/Hdgfl3/Sptan1/Tpx2/Vps4b/Cfl2/Mtpn/Capza2/Add3/Eml4/Apc/Rdx	17
GO:0031122	GO:0031122	cytoplasmic microtubule organization	11/1569	62/28814	0.000470343921555642	0.00352423890086081	0.00254793066357071	Pafah1b1/Hook1/Slk/Ccdc88a/Pcm1/Rhoa/Cript/Ift88/Dync1h1/Rab11a/Apc	11
GO:0043457	GO:0043457	regulation of cellular respiration	11/1569	62/28814	0.000470343921555642	0.00352423890086081	0.00254793066357071	Cox7a2/Uqcc2/Park7/Cox7a2l/Cisd1/Vcp/Cycs/Dnajc15/Rhoa/Slc25a33/Hif1a	11
GO:0000289	GO:0000289	nuclear-transcribed mRNA poly(A) tail shortening	7/1569	27/28814	0.000474413555606975	0.00354159915858115	0.00256048166655815	Pabpc1/Tnrc6c/Eif4enif1/Polr2g/Cnot6l/Tnrc6b/Samd4b	7
GO:0046823	GO:0046823	negative regulation of nucleocytoplasmic transport	7/1569	27/28814	0.000474413555606975	0.00354159915858115	0.00256048166655815	Tpr/Park7/Sumo1/Nup153/Pkig/Ppp2ca/Ufm1	7
GO:0018105	GO:0018105	peptidyl-serine phosphorylation	34/1569	339/28814	0.000474674996230687	0.00354159915858115	0.00256048166655815	H3f3a/Rack1/Hsp90ab1/Hsp90aa1/Wnk1/Rock1/Rock2/Atr/Park7/Pkn2/Mif/Top1/Caprin2/Nsd1/Pdcd10/Pdpk1/Csnk2a1/Csnk2a2/Pak2/Akap9/Csnk1a1/Cdk1/Mark3/Fnip1/Pikfyve/Pak1/Clspn/Stk38/Pdk3/Mapkap1/Chuk/App/Eif4g1/Bag4	34
GO:1903052	GO:1903052	positive regulation of proteolysis involved in cellular protein catabolic process	17/1569	126/28814	0.000491511096073983	0.00366203535563596	0.00264755382259298	Rack1/Sumo2/Fmr1/Rbx1/Sumo1/Vcp/Ptk2/Ube2v2/Fbxw7/Cdc20/Gclc/Mdm2/Cop1/Arih1/Atpif1/Stub1/Bcap31	17
GO:0032231	GO:0032231	regulation of actin filament bundle assembly	16/1569	115/28814	0.000503943906442417	0.00374937109518159	0.00271069523129816	Actg1/Stmn1/Rock2/Cfl1/Cdc42/Ccdc88a/Pak2/Pfn1/Rhoa/Rac1/Pak1/Alms1/Tmsb15b2/Tjp1/Rdx/Bag4	16
GO:0021795	GO:0021795	cerebral cortex cell migration	10/1569	53/28814	0.000507248418031212	0.00376334093546363	0.00272079505296777	Pafah1b1/Rtn4/Pex13/Rhoa/Rac1/Rnf7/Srgap2/Ctnnb1/Cul5/Lrp6	10
GO:0051438	GO:0051438	regulation of ubiquitin-protein transferase activity	10/1569	53/28814	0.000507248418031212	0.00376334093546363	0.00272079505296777	Ube2s/Park7/Ube2l3/Dcun1d5/Ube2n/Pin1/Fbxw7/Cdc20/Topors/Stub1	10
GO:0017145	GO:0017145	stem cell division	9/1569	44/28814	0.000516233580828927	0.00381614050989005	0.00275896773606019	Stra8/Pafah1b1/Cul3/Cntrl/Fubp1/Thoc2/Tial1/Bmi1/Gnl3	9
GO:0044827	GO:0044827	modulation by host of viral genome replication	6/1569	20/28814	0.000516417235978424	0.00381614050989005	0.00275896773606019	Hspa8/Fmr1/Vapa/Ythdc2/Nucks1/Ppib	6
GO:0035264	GO:0035264	multicellular organism growth	25/1569	223/28814	0.000516535416883696	0.00381614050989005	0.00275896773606019	H3f3b/H3f3a/Brca2/Sod1/Nipbl/Ankrd11/Tmed2/Gnas/Ndufs6/Nek1/Rbbp6/Adarb1/Gigyf2/Taf10/Ppib/Alms1/Celf1/Kmt2c/Kdm2a/Atxn2/Ncor1/Rc3h2/Ep300/App/Rasal2	25
GO:0043280	GO:0043280	positive regulation of cysteine-type endopeptidase activity involved in apoptotic process	17/1569	127/28814	0.000539198150574969	0.00397800034165449	0.00287598807439545	Rack1/Casp8ap2/Hmgb1/Anp32b/Pdcd5/Hspd1/Vcp/Cycs/Rhoa/Rnf7/Cyct/Mtch2/Ppp2ca/Fam162a/Sirt1/App/Bcap31	17
GO:0070997	GO:0070997	neuron death	41/1569	438/28814	0.000554088921137559	0.00408214952374389	0.00295128515330987	Npm1/Rack1/Hsp90ab1/Fmr1/Rock1/Sod1/Kras/Eif2s1/Cdc42/Gclm/Park7/Atp5g1/Hspd1/Nae1/Sod2/Cited1/Set/Pdpk1/Ube2m/Mdk/Pin1/Vps35/Alg13/Rhoa/Ube2v2/Adarb1/Btbd10/Atf2/Fbxw7/Ndufs4/Ctnnb1/Parp1/Chmp4b/Hif1a/Fam162a/Gclc/Kdm2b/Sirt1/Hdgf/Adnp/App	41
GO:0031570	GO:0031570	DNA integrity checkpoint signaling	16/1569	116/28814	0.00055553960397356	0.00408712888557954	0.00295488509901814	Tipin/Atr/Topbp1/Nae1/Nek1/Taok1/Rad17/Cdc5l/Cdk1/Gigyf2/Atf2/Ddx39b/Dtl/Clspn/Thoc1/Mdm2	16
GO:2000060	GO:2000060	positive regulation of ubiquitin-dependent protein catabolic process	15/1569	105/28814	0.000561520469360085	0.00412537670734603	0.00298253725332296	Rack1/Sumo2/Rbx1/Sumo1/Vcp/Ptk2/Ube2v2/Fbxw7/Cdc20/Gclc/Mdm2/Cop1/Arih1/Stub1/Bcap31	15
GO:0110053	GO:0110053	regulation of actin filament organization	29/1569	276/28814	0.000569902436730823	0.00418113401078594	0.00302284829555051	Mphosph8/Actg1/Stmn1/Rock2/Cfl1/Cdc42/Arpc1a/Ccdc88a/Arpc2/Rasa1/Brk1/Sptan1/Arf1/Arpc5l/Pak2/Pfn1/Cfl2/Rhoa/Rac1/Mtpn/Pak1/Capza2/Alms1/Add3/Tmsb15b2/Tjp1/Rdx/Tmsb4x/Bag4	29
GO:0050807	GO:0050807	regulation of synapse organization	28/1569	263/28814	0.000571011484065637	0.00418345219228644	0.00302452427890322	Hspa8/Pafah1b1/Fmr1/Arf4/Cfl1/Cdc42/Hnrnpk/Caprin2/Dhx36/Vcp/Caprin1/Ube3a/Rheb/Vps35/Tanc2/Ptk2/Rhoa/Ube2v2/Ywhaz/Cript/Pgrmc1/Cdc20/Chmp4b/Nedd4/Afdn/Adnp/App/Eif4g1	28
GO:0009048	GO:0009048	dosage compensation by inactivation of X chromosome	8/1569	36/28814	0.000584457824485981	0.00427602638580242	0.0030914529500149	Hnrnpu/Ythdc1/Suz12/Pcgf5/Smchd1/Jarid2/Lrif1/Phf20	8
GO:0010976	GO:0010976	positive regulation of neuron projection development	25/1569	225/28814	0.000589568055160574	0.00430743973818841	0.00311416396536924	Eef1a1/Pafah1b1/Hspa5/Nme2/Qk/Hnrnpk/Caprin2/Dhx36/Snx3/Ranbp1/Rtn4/Caprin1/Ezh2/Mdk/Ube2v2/Atf1/Dynlt1b/Nme1/Afdn/Tmem30a/Setx/Ep300/Sirt1/Lrp6/Adnp	25
GO:0031065	GO:0031065	positive regulation of histone deacetylation	7/1569	28/28814	0.000603037155846657	0.00439367541034684	0.00317651005471422	Smarca5/Nipbl/Baz2a/Akap8l/Ncor1/Sirt1/BC004004	7
GO:0090169	GO:0090169	regulation of spindle assembly	7/1569	28/28814	0.000603037155846657	0.00439367541034684	0.00317651005471422	Tpr/Hnrnpu/Senp6/Rnf4/Vps4b/Chmp4b/Dync1h1	7
GO:1901879	GO:1901879	regulation of protein depolymerization	14/1569	95/28814	0.000617159158796411	0.00449036491400148	0.00324641398521873	Mphosph8/Cfl1/Arpc2/Taok1/Hdgfl3/Sptan1/Tpx2/Cfl2/Mtpn/Capza2/Add3/Eml4/Apc/Rdx	14
GO:0045091	GO:0045091	regulation of single stranded viral RNA replication via double stranded DNA intermediate	5/1569	14/28814	0.000629492449691522	0.0045675002367576	0.00330218076483368	Mphosph8/Top2a/Setdb1/Top2b/Trim28	5
GO:0051988	GO:0051988	regulation of attachment of spindle microtubules to kinetochore	5/1569	14/28814	0.000629492449691522	0.0045675002367576	0.00330218076483368	Hnrnpu/Cdc42/Cenpe/Apc/Becn1	5
GO:0048872	GO:0048872	homeostasis of number of cells	36/1569	372/28814	0.00064114293682125	0.00464564421941222	0.00335867677863417	Tex15/Prdx1/Ubap2l/Hmgb1/Sod1/Kras/Hmgb2/Kdm1a/Mif/Siva1/Ncapg2/Hspa9/Kmt2a/Ezh2/Cyld/Smap1/Smarca4/Tcea1/Rac1/Gigyf2/Mtch2/Kmt2e/Ptpn2/Kif3a/Ift88/Prmt1/Hif1a/Atxn2/Bmi1/Afdn/Prdx5/Ppp3cb/Ncor1/Tsc22d3/Rc3h2/Atpif1	36
GO:0042326	GO:0042326	negative regulation of phosphorylation	38/1569	400/28814	0.00065621376418921	0.0047483231908067	0.00343291093445601	Npm1/Ppia/Dynll1/Rack1/Actb/Wnk1/Rock1/Hnrnpu/Dnaja1/Dnajc3/Ube2b/Rtraf/Park7/Tmed2/Ppp4r2/Hspa4/Prkar1a/Ppp4r3b/Inca1/Tsg101/Taf7/Adarb1/Mtch2/Pkig/Ptpn2/Stk38/Dnajc10/Ibtk/Chordc1/Tardbp/Ppp2ca/Ncor1/Apc/Cep85/Sirt1/Lrp6/Ppp4c/Eif4g1	38
GO:0072384	GO:0072384	organelle transport along microtubule	13/1569	85/28814	0.000666127934524496	0.00481345870495441	0.00348000217272134	Pafah1b1/Cdc42/Kif1b/Kif5b/Actr10/Spast/Dync1h1/Hif1a/Hsbp1/Ap3s1/Lamp1/Copg2/Rab1a	13
GO:2000116	GO:2000116	regulation of cysteine-type endopeptidase activity	26/1569	240/28814	0.000679913224555197	0.00490635056023073	0.00354716050480737	Rack1/Casp8ap2/Hmgb1/Anp32b/Arl6ip1/Pdcd5/Park7/Rnf34/Hspd1/Vcp/Cycs/Usp47/Csnk2a1/Lamtor5/Pak2/Rhoa/Rnf7/Cyct/Mtch2/Fnip1/Ppp2ca/Fam162a/Mdm2/Sirt1/App/Bcap31	26
GO:0006111	GO:0006111	regulation of gluconeogenesis	10/1569	55/28814	0.000689310894989481	0.00494427454430653	0.00357457853310503	Arpp19/Ranbp2/Ppp4r3b/Ptpn2/Ppp4r3a/Hif1a/Usp7/Ddb1/Ep300/Sirt1	10
GO:0051205	GO:0051205	protein insertion into membrane	10/1569	55/28814	0.000689310894989481	0.00494427454430653	0.00357457853310503	Hsp90aa1/Pdcd5/Hspa4/Tomm22/Emc6/Emc7/Timm13/Romo1/Sh3glb1/Emc2	10
GO:2000378	GO:2000378	negative regulation of reactive oxygen species metabolic process	10/1569	55/28814	0.000689310894989481	0.00494427454430653	0.00357457853310503	Eef1a1/Park7/Atp5g1/Hspd1/Ndufc2/Cycs/Rhoa/Hif1a/Sirt1/Becn1	10
GO:0034587	GO:0034587	piRNA metabolic process	6/1569	21/28814	0.000689855178125044	0.00494427454430653	0.00357457853310503	Fkbp6/Ddx4/Tdrkh/Mael/Mov10l1/Mybl1	6
GO:2000269	GO:2000269	regulation of fibroblast apoptotic process	6/1569	21/28814	0.000689855178125044	0.00494427454430653	0.00357457853310503	Ier3ip1/Stk17b/Chd8/Sirt1/Cfdp1/Ruvbl1	6
GO:0071479	GO:0071479	cellular response to ionizing radiation	12/1569	75/28814	0.000701467705963534	0.00502068134186926	0.00362981860844945	Brca2/Swi5/Nipbl/Kdm1a/Atr/Gtf2h5/Rnf4/Nucks1/Eef1d/Fignl1/Mdm2/Sirt1	12
GO:0031047	GO:0031047	gene silencing by RNA	22/1569	190/28814	0.000704992743820186	0.00503907415128927	0.003643116118757	Tex15/Ddx5/Hnrnpa2b1/Fmr1/Fkbp6/Tut4/Pabpc1/Kcnq1ot1/Ddx4/Tnrc6c/Tsn/Fxr1/Tdrkh/Mael/Eif4enif1/Mov10l1/Ddx17/Tial1/Cnot6l/Tnrc6b/Ncor1/Eri1	22
GO:0040020	GO:0040020	regulation of meiotic nuclear division	8/1569	37/28814	0.000710449302488267	0.00506435144679136	0.00366139092875532	Stra8/Dazl/Calr/Hormad1/Ube2b/Prdm9/Psma8/Cdc20	8
GO:0051647	GO:0051647	nucleus localization	8/1569	37/28814	0.000710449302488267	0.00506435144679136	0.00366139092875532	Pafah1b1/Cdc42/Nudc/Pcm1/Cdc42bpa/Ptk2/Dync1h1/Tacc1	8
GO:0060999	GO:0060999	positive regulation of dendritic spine development	11/1569	65/28814	0.000713437998694818	0.00507879277073571	0.00367183162052891	Pafah1b1/Fmr1/Cfl1/Hnrnpk/Pbrm1/Caprin2/Dhx36/Caprin1/Arf1/Rac1/Afdn	11
GO:0006383	GO:0006383	transcription by RNA polymerase III	9/1569	46/28814	0.000727440299692524	0.00515759083451353	0.00372880051752407	Smarca5/Dek/Dhx36/Sf3b1/Baz1b/Ddx21/Prdx5/Chd8/Bdp1	9
GO:0033047	GO:0033047	regulation of mitotic sister chromatid segregation	9/1569	46/28814	0.000727440299692524	0.00515759083451353	0.00372880051752407	Tpr/Bub1/Hnrnpu/Cenpe/Ik/Tex14/Apc/Zfp207/Becn1	9
GO:1900087	GO:1900087	positive regulation of G1/S transition of mitotic cell cycle	9/1569	46/28814	0.000727440299692524	0.00515759083451353	0.00372880051752407	Anp32b/Ankrd17/Cul4b/Kmt2e/Larp7/Dbf4/Mdm2/Rdx/Eif4g1	9
GO:0000470	GO:0000470	maturation of LSU-rRNA	7/1569	29/28814	0.000757857000407937	0.0053516675731618	0.00386911281966879	Npm1/Snu13/Rsl1d1/Nsa2/Ddx18/Gtpbp4/Las1l	7
GO:0010592	GO:0010592	positive regulation of lamellipodium assembly	7/1569	29/28814	0.000757857000407937	0.0053516675731618	0.00386911281966879	Cfl1/Cdc42/Arpc2/Brk1/Rac1/Auts2/Akirin1	7
GO:0034067	GO:0034067	protein localization to Golgi apparatus	7/1569	29/28814	0.000757857000407937	0.0053516675731618	0.00386911281966879	Tmed10/Rab6a/Gbf1/Vps13a/Ift20/Gcc2/Arl1	7
GO:0034614	GO:0034614	cellular response to reactive oxygen species	18/1569	143/28814	0.000790101280301774	0.00557190408234206	0.00402833793770522	Rack1/Prdx1/Cfl1/Sod1/Park7/Stk25/Sod2/Pdcd10/Ezh2/Romo1/Akr1b3/Parp1/Prdx5/Hdac2/Chuk/Setx/Sirt1/Dhfr	18
GO:1903051	GO:1903051	negative regulation of proteolysis involved in cellular protein catabolic process	11/1569	66/28814	0.000814616614434289	0.00573711968109596	0.00414778440600862	Hsp90ab1/Ubxn1/Park7/Smarcc1/Csnk2a1/Csnk2a2/Eif3h/Rybp/Gabarapl2/Usp7/Usp19	11
GO:0045995	GO:0045995	regulation of embryonic development	13/1569	87/28814	0.000834357457020332	0.00586831411437634	0.00424263447969777	Pafah1b1/Cfl1/Hspa5/Nipbl/Dhx36/Rab14/Trip12/Sgf29/Yy1/Ctnnb1/Dr1/Lrp6/Ruvbl1	13
GO:0000077	GO:0000077	DNA damage checkpoint signaling	15/1569	109/28814	0.000836280103255029	0.00587400471993379	0.00424674863563385	Tipin/Atr/Topbp1/Nek1/Taok1/Rad17/Cdc5l/Cdk1/Gigyf2/Atf2/Ddx39b/Dtl/Clspn/Thoc1/Mdm2	15
GO:0035307	GO:0035307	positive regulation of protein dephosphorylation	9/1569	47/28814	0.00085679289838141	0.00596253124820049	0.00431075095280227	Ppia/Hsp90ab1/Calm1/Camta1/Ppp1r12a/Calm2/Pin1/Calm3/Ppp2ca	9
GO:0045005	GO:0045005	DNA-templated DNA replication maintenance of fidelity	9/1569	47/28814	0.00085679289838141	0.00596253124820049	0.00431075095280227	Brca2/Tipin/Alyref/Atr/Pcna/Bod1l/Nucks1/Thoc1/Pole	9
GO:0007549	GO:0007549	dosage compensation	8/1569	38/28814	0.000857409734333701	0.00596253124820049	0.00431075095280227	Hnrnpu/Ythdc1/Suz12/Pcgf5/Smchd1/Jarid2/Lrif1/Phf20	8
GO:0010664	GO:0010664	negative regulation of striated muscle cell apoptotic process	8/1569	38/28814	0.000857409734333701	0.00596253124820049	0.00431075095280227	Npm1/Hspa8/Qk/Naca/Pdpk1/Mdk/Sirt1/Pcmt1	8
GO:0060236	GO:0060236	regulation of mitotic spindle organization	8/1569	38/28814	0.000857409734333701	0.00596253124820049	0.00431075095280227	Tpr/Hnrnpu/Rae1/Tpx2/Vps4b/Cltc/Chmp4b/Dync1h1	8
GO:1902229	GO:1902229	regulation of intrinsic apoptotic signaling pathway in response to DNA damage	8/1569	38/28814	0.000857409734333701	0.00596253124820049	0.00431075095280227	Tpt1/Kdm1a/Mif/Hnrnpk/Atad5/Usp47/Mtch2/Sirt1	8
GO:0009451	GO:0009451	RNA modification	18/1569	144/28814	0.000857926297134441	0.00596253124820049	0.00431075095280227	Hnrnpab/Nop10/Hnrnpc/Alkbh5/Zc3h13/Ramac/Syncrip/Trmt112/Adarb1/Thumpd1/Larp7/Emg1/Dnajb11/Cbll1/Mettl16/Trmt10a/Fbl/Adad1	18
GO:0010821	GO:0010821	regulation of mitochondrion organization	18/1569	144/28814	0.000857926297134441	0.00596253124820049	0.00431075095280227	Slc25a31/Pdcd5/Higd1a/Siva1/Huwe1/Rala/Sh3glb1/Vps35/Fbxw7/Mtch2/Chchd10/Hif1a/Bnip3l/Fam162a/Gclc/Ep300/Ddhd2/Atpif1	18
GO:0001838	GO:0001838	embryonic epithelial tube formation	19/1569	156/28814	0.000860548825770067	0.00597288823149619	0.00431823877529772	Luzp1/Rock2/Cfl1/Tmed2/Spint2/Brd2/Rala/Hectd1/Pfn1/Gatad2a/Ctnnb1/Kif20b/Kdm2a/Hif1a/Enah/Cecr2/Kdm2b/Lrp6/Setd2	19
GO:1903363	GO:1903363	negative regulation of cellular protein catabolic process	12/1569	77/28814	0.000892873163069073	0.00618470113503937	0.00447137385128414	Hsp90ab1/Ubxn1/Park7/Smarcc1/Csnk2a1/Csnk2a2/Vps35/Eif3h/Rybp/Gabarapl2/Usp7/Usp19	12
GO:0032785	GO:0032785	negative regulation of DNA-templated transcription, elongation	5/1569	15/28814	0.000902050166989287	0.00618470113503937	0.00447137385128414	Hnrnpu/Ezh2/Supt4a/Eapp/Nelfe	5
GO:0039692	GO:0039692	single stranded viral RNA replication via double stranded DNA intermediate	5/1569	15/28814	0.000902050166989287	0.00618470113503937	0.00447137385128414	Mphosph8/Top2a/Setdb1/Top2b/Trim28	5
GO:0048308	GO:0048308	organelle inheritance	5/1569	15/28814	0.000902050166989287	0.00618470113503937	0.00447137385128414	Stk25/Pdcd10/Gbf1/Cdk1/Ywhaz	5
GO:0048313	GO:0048313	Golgi inheritance	5/1569	15/28814	0.000902050166989287	0.00618470113503937	0.00447137385128414	Stk25/Pdcd10/Gbf1/Cdk1/Ywhaz	5
GO:0051645	GO:0051645	Golgi localization	5/1569	15/28814	0.000902050166989287	0.00618470113503937	0.00447137385128414	Cdc42/Stk25/Pdcd10/Ywhaz/Arcn1	5
GO:0060211	GO:0060211	regulation of nuclear-transcribed mRNA poly(A) tail shortening	5/1569	15/28814	0.000902050166989287	0.00618470113503937	0.00447137385128414	Pabpc1/Tnrc6c/Eif4enif1/Polr2g/Tnrc6b	5
GO:1905906	GO:1905906	regulation of amyloid fibril formation	5/1569	15/28814	0.000902050166989287	0.00618470113503937	0.00447137385128414	Pfdn2/Pfdn5/Pfdn4/Pfdn6/App	5
GO:0032535	GO:0032535	regulation of cellular component size	37/1569	393/28814	0.00090402391516329	0.00618470113503937	0.00447137385128414	Npm1/Mphosph8/Pafah1b1/Hsp90ab1/Arhgap5/Cfl1/Arpc1a/Atp5g1/Golga4/Rb1cc1/Arpc2/Rtn4/Rasa1/Brk1/Sptan1/Arpc5l/Lamtor5/Lars/Macf1/Pfn1/Cfl2/Rhoa/Rac1/Mtpn/Pak1/Capza2/Add3/Ap2m1/Wdr36/Tmsb15b2/Rab11a/Rab5a/Rdx/Adnp/Tmsb4x/Rab22a/Bag4	37
GO:0016973	GO:0016973	poly(A)+ mRNA export from nucleus	6/1569	22/28814	0.00090513540781998	0.00618470113503937	0.00447137385128414	Iws1/Nxf2/Eny2/Sarnp/Pabpn1/Thoc2	6
GO:0032516	GO:0032516	positive regulation of phosphoprotein phosphatase activity	6/1569	22/28814	0.00090513540781998	0.00618470113503937	0.00447137385128414	Hsp90ab1/Calm1/Ppp1r12a/Calm2/Calm3/Ppp2ca	6
GO:0046599	GO:0046599	regulation of centriole replication	6/1569	22/28814	0.00090513540781998	0.00618470113503937	0.00447137385128414	Npm1/Trim37/Vps4b/Alms1/Cep295/Plk4	6
GO:0050803	GO:0050803	regulation of synapse structure or activity	28/1569	271/28814	0.000911586653950363	0.00622072393219685	0.00449741737218243	Hspa8/Pafah1b1/Fmr1/Arf4/Cfl1/Cdc42/Hnrnpk/Caprin2/Dhx36/Vcp/Caprin1/Ube3a/Rheb/Vps35/Tanc2/Ptk2/Rhoa/Ube2v2/Ywhaz/Cript/Pgrmc1/Cdc20/Chmp4b/Nedd4/Afdn/Adnp/App/Eif4g1	28
GO:1901800	GO:1901800	positive regulation of proteasomal protein catabolic process	15/1569	110/28814	0.000920474174591367	0.00627325745603289	0.00453539770779889	Rack1/Sumo2/Fmr1/Rbx1/Sumo1/Vcp/Ube2v2/Fbxw7/Cdc20/Gclc/Mdm2/Cop1/Arih1/Stub1/Bcap31	15
GO:0030330	GO:0030330	DNA damage response, signal transduction by p53 class mediator	11/1569	67/28814	0.000927400282049126	0.00631230514556018	0.00456362814514633	Npm1/Ddx5/Brca2/Kdm1a/Atr/Mif/Senp2/Pttg1ip/Cops3/Mdm2/Sirt1	11
GO:0032956	GO:0032956	regulation of actin cytoskeleton organization	35/1569	366/28814	0.000933251154976889	0.00634394309600914	0.00458650153890568	Mphosph8/Actg1/Rock1/Stmn1/Rock2/Cd2ap/Cfl1/Cdc42/Arpc1a/Ccdc88a/Arpc2/Rasa1/Taok1/Brk1/Ctsl/Sptan1/Arf1/Mdk/Arpc5l/Pak2/Pfn1/Cfl2/Rhoa/Rac1/Mtpn/Pak1/Capza2/Alms1/Add3/Tmsb15b2/Hdac2/Tjp1/Rdx/Tmsb4x/Bag4	35
GO:0051492	GO:0051492	regulation of stress fiber assembly	14/1569	99/28814	0.000937522234540269	0.0063647745009008	0.00460156208865325	Actg1/Stmn1/Rock2/Cdc42/Ccdc88a/Pak2/Pfn1/Rhoa/Rac1/Pak1/Alms1/Tmsb15b2/Tjp1/Bag4	14
GO:0051446	GO:0051446	positive regulation of meiotic cell cycle	7/1569	30/28814	0.000942471810697508	0.00639015270106601	0.00461990985002986	Stra8/Dazl/Meioc/Ube2b/Ythdc2/Prdm9/Topaz1	7
GO:0051090	GO:0051090	regulation of DNA-binding transcription factor activity	40/1569	436/28814	0.000945900345111899	0.00640516600829945	0.00463076407045526	Npm1/Ptma/Ppia/4930447C04Rik/Tut4/Mtdh/Psma6/Kdm5a/Kras/Tax1bp1/Kdm1a/Park7/Sumo1/Rwdd1/Siva1/Trim52/Ube2n/Trim37/Ezh2/Cyld/Lamtor5/Med13/Smarca4/Mtpn/Atf2/Pura/Ctnnb1/Usp7/Phb2/Hdac2/Chuk/Peli1/Faf1/Commd1/Ep300/Sirt1/Lrp6/App/Trim41/Rnf2	40
GO:0099173	GO:0099173	postsynapse organization	23/1569	207/28814	0.000956272213546954	0.00646709734161562	0.00467553877149881	Actb/Hspa8/Pafah1b1/Rock2/Arf4/Ckap5/Cfl1/Cdc42/Hnrnpk/Caprin2/Dhx36/Caprin1/Ube3a/Arf1/Rheb/Vps35/Tanc2/Cadm1/Cript/Chmp4b/Afdn/Snx27/App	23
GO:0032868	GO:0032868	response to insulin	26/1569	246/28814	0.000980213637776348	0.00662052104900158	0.00478646001706814	Srsf3/Ybx1/Hnrnpk/Eprs/Syap1/Cited1/Smarcc1/Atp2b1/Srsf5/Nucks1/Gnai2/Rab10/Slc25a33/Uchl3/Pak1/Ptpra/Ptpn2/Parp1/Appl1/Hadha/Zfp106/Pkm/Apc/Sirt1/Osbpl8/Rbp4	26
GO:0010212	GO:0010212	response to ionizing radiation	17/1569	134/28814	0.000998242601768572	0.00673366972420616	0.00486826348930884	Brca2/Swi5/Nipbl/Kdm1a/Atr/Topbp1/Sod2/Nabp1/Gtf2h5/Nek1/Rnf4/Nucks1/Eef1d/Fignl1/Mdm2/Sirt1/Cop1	17
GO:0042306	GO:0042306	regulation of protein import into nucleus	12/1569	78/28814	0.00100378657014131	0.00674814170326834	0.00487872634391443	Tpr/Hsp90ab1/Ran/Sumo1/Cdk1/Pkig/Ubr5/Tardbp/Ppp2ca/Trim28/Nup54/Ufm1	12
GO:0042073	GO:0042073	intraciliary transport	9/1569	48/28814	0.00100422582693188	0.00674814170326834	0.00487872634391443	Dynll1/Hspb11/Ift74/Pcm1/Ift81/Rpgr/Ift88/Ssna1/Ift20	9
GO:0051972	GO:0051972	regulation of telomerase activity	9/1569	48/28814	0.00100422582693188	0.00674814170326834	0.00487872634391443	Hsp90ab1/Hsp90aa1/Hnrnpa2b1/Ptges3/Cct2/Cct4/Tcp1/Hnrnpd/Ctnnb1	9
GO:2000045	GO:2000045	regulation of G1/S transition of mitotic cell cycle	18/1569	146/28814	0.00100861658792807	0.00676902353857581	0.00489382335350664	Anp32b/Senp2/Ezh2/Ankrd17/Brd7/Gigyf2/Cul4b/Kmt2e/Larp7/Appl1/Dbf4/Ppp2ca/Apc/Mdm2/Ccnh/Rdx/Eif4g1/Cdc73	18
GO:0110020	GO:0110020	regulation of actomyosin structure organization	15/1569	111/28814	0.0010117236498554	0.00678124809782368	0.00490266138357001	Actg1/Stmn1/Rock2/Cdc42/Ccdc88a/Pak2/Pfn1/Rhoa/Rac1/Pak1/Alms1/Tmsb15b2/Hdac2/Tjp1/Bag4	15
GO:0010389	GO:0010389	regulation of G2/M transition of mitotic cell cycle	14/1569	100/28814	0.00103650599243534	0.00693853947981777	0.00501637885465299	Cenpf/Topbp1/Nae1/Nabp1/Usp47/Taok1/Rad17/Vps4b/Cdk1/Hspa2/Dtl/Clspn/Rab11a/App	14
GO:0022029	GO:0022029	telencephalon cell migration	11/1569	68/28814	0.00105278565211566	0.00702078927295838	0.00507584325985098	Pafah1b1/Rtn4/Pex13/Rhoa/Rac1/Rnf7/Srgap2/Ctnnb1/Cul5/Arl13b/Lrp6	11
GO:0030837	GO:0030837	negative regulation of actin filament polymerization	11/1569	68/28814	0.00105278565211566	0.00702078927295838	0.00507584325985098	Mphosph8/Cfl1/Arpc2/Sptan1/Pfn1/Mtpn/Capza2/Add3/Tmsb15b2/Rdx/Tmsb4x	11
GO:1905710	GO:1905710	positive regulation of membrane permeability	11/1569	68/28814	0.00105278565211566	0.00702078927295838	0.00507584325985098	Hspa8/Slc25a31/Siva1/Vdac2/Sh3glb1/Spg7/Atf2/Chchd10/Bnip3l/Gclc/Atpif1	11
GO:0030071	GO:0030071	regulation of mitotic metaphase/anaphase transition	10/1569	58/28814	0.00106061932621481	0.00706409967901911	0.00510715552748041	Tpr/Bub1/Cul3/Anapc5/Cenpe/Ik/Tex14/Apc/Anapc11/Zfp207	10
GO:0001843	GO:0001843	neural tube closure	15/1569	112/28814	0.00111048980937452	0.00738692779880278	0.0053405516418184	Rock2/Tmed2/Spint2/Brd2/Rala/Hectd1/Pfn1/Gatad2a/Kif20b/Kdm2a/Enah/Cecr2/Kdm2b/Lrp6/Setd2	15
GO:0000422	GO:0000422	autophagy of mitochondrion	12/1569	79/28814	0.0011259133777879	0.00747068310419017	0.00540110449218877	Tomm7/Huwe1/Rb1cc1/Fbxw7/Map1lc3b/Gabarapl2/Hif1a/Bnip3l/Phb2/Cisd2/Atpif1/Becn1	12
GO:0061726	GO:0061726	mitochondrion disassembly	12/1569	79/28814	0.0011259133777879	0.00747068310419017	0.00540110449218877	Tomm7/Huwe1/Rb1cc1/Fbxw7/Map1lc3b/Gabarapl2/Hif1a/Bnip3l/Phb2/Cisd2/Atpif1/Becn1	12
GO:0051650	GO:0051650	establishment of vesicle localization	20/1569	172/28814	0.00114298679774864	0.0075744414046785	0.00547611897413823	Pafah1b1/Cul3/Tmed10/Sar1a/Arf1/Vps4b/Tanc2/Kif1b/Kif5b/Fnbp1l/Tsg101/Gbf1/Ctnnb1/Trip11/Dync1h1/Rab11a/Ap3s1/Snf8/Ap1s2/Rab1a	20
GO:0045454	GO:0045454	cell redox homeostasis	7/1569	31/28814	0.00116071737966389	0.00768228880517819	0.00555408976625804	Prdx4/Prdx1/Krit1/Glrx3/Dld/Prdx5/Gclc	7
GO:1901028	GO:1901028	regulation of mitochondrial outer membrane permeabilization involved in apoptotic signaling pathway	6/1569	23/28814	0.00116860940843289	0.00772483036276125	0.00558484617695865	Slc25a31/Siva1/Sh3glb1/Chchd10/Gclc/Atpif1	6
GO:1901799	GO:1901799	negative regulation of proteasomal protein catabolic process	9/1569	49/28814	0.00117155087403515	0.00773458180292293	0.00559189620793011	Hsp90ab1/Ubxn1/Park7/Smarcc1/Eif3h/Rybp/Gabarapl2/Usp7/Usp19	9
GO:0071214	GO:0071214	cellular response to abiotic stimulus	32/1569	330/28814	0.0012014442510546	0.00791213286431087	0.00572026088648507	Npm1/Actb/Brca2/Fmr1/Swi5/Eif2s1/Nipbl/Kdm1a/Atr/Pcna/Dhx36/Gtf2h5/Usp47/Rnf4/Nucks1/Cops9/Akr1b3/Rac1/Fbxw7/Mtch2/Cul4b/Rpgr/Yy1/Ctnnb1/Parp1/Eef1d/Fignl1/Nedd4/Mdm2/Ddb1/Ep300/Sirt1	32
GO:0104004	GO:0104004	cellular response to environmental stimulus	32/1569	330/28814	0.0012014442510546	0.00791213286431087	0.00572026088648507	Npm1/Actb/Brca2/Fmr1/Swi5/Eif2s1/Nipbl/Kdm1a/Atr/Pcna/Dhx36/Gtf2h5/Usp47/Rnf4/Nucks1/Cops9/Akr1b3/Rac1/Fbxw7/Mtch2/Cul4b/Rpgr/Yy1/Ctnnb1/Parp1/Eef1d/Fignl1/Nedd4/Mdm2/Ddb1/Ep300/Sirt1	32
GO:0060606	GO:0060606	tube closure	15/1569	113/28814	0.0012172540447638	0.00800625322459979	0.00578830739490647	Rock2/Tmed2/Spint2/Brd2/Rala/Hectd1/Pfn1/Gatad2a/Kif20b/Kdm2a/Enah/Cecr2/Kdm2b/Lrp6/Setd2	15
GO:0006284	GO:0006284	base-excision repair	8/1569	40/28814	0.00122416010873912	0.00801171783324919	0.00579225816110987	Hmgb1/Pcna/Huwe1/Usp47/Lig1/Lig3/Parp1/Pole	8
GO:0016578	GO:0016578	histone deubiquitination	8/1569	40/28814	0.00122416010873912	0.00801171783324919	0.00579225816110987	Usp3/Eny2/Usp16/Usp15/Taf7/Taf10/Sgf29/Usp7	8
GO:0033144	GO:0033144	negative regulation of intracellular steroid hormone receptor signaling pathway	8/1569	40/28814	0.00122416010873912	0.00801171783324919	0.00579225816110987	Calr/Hdac1/Smarca4/Rhoa/Strn3/Phb2/Ncor1/Sirt1	8
GO:0070849	GO:0070849	response to epidermal growth factor	8/1569	40/28814	0.00122416010873912	0.00801171783324919	0.00579225816110987	Ncl/Eef1a1/Tpr/Cfl1/Syap1/Arpc2/Rasa1/Bag4	8
GO:0032970	GO:0032970	regulation of actin filament-based process	38/1569	414/28814	0.00123855223722202	0.00809586499547229	0.00585309431351381	Mphosph8/Actg1/Rock1/Stmn1/Rock2/Cd2ap/Cfl1/Cdc42/Arpc1a/Sumo1/Ccdc88a/Arpc2/Rasa1/Taok1/Brk1/Ctsl/Sptan1/Arf1/Mdk/Arpc5l/Pak2/Atp2a2/Akap9/Pfn1/Cfl2/Rhoa/Rac1/Mtpn/Pak1/Capza2/Alms1/Add3/Tmsb15b2/Hdac2/Tjp1/Rdx/Tmsb4x/Bag4	38
GO:0000076	GO:0000076	DNA replication checkpoint signaling	5/1569	16/28814	0.00125353535573974	0.00812334029671639	0.00587295822299895	Tipin/Topbp1/Nae1/Rad17/Clspn	5
GO:0000712	GO:0000712	resolution of meiotic recombination intermediates	5/1569	16/28814	0.00125353535573974	0.00812334029671639	0.00587295822299895	Top2a/Top2b/Tex11/Meiob/Hfm1	5
GO:0035112	GO:0035112	genitalia morphogenesis	5/1569	16/28814	0.00125353535573974	0.00812334029671639	0.00587295822299895	Nipbl/Sycp2/Ctnnb1/Lrp6/Rbp4	5
GO:0060788	GO:0060788	ectodermal placode formation	5/1569	16/28814	0.00125353535573974	0.00812334029671639	0.00587295822299895	Gnas/Hdac1/Ctnnb1/Hdac2/Lrp6	5
GO:0071697	GO:0071697	ectodermal placode morphogenesis	5/1569	16/28814	0.00125353535573974	0.00812334029671639	0.00587295822299895	Gnas/Hdac1/Ctnnb1/Hdac2/Lrp6	5
GO:0106380	GO:0106380	purine ribonucleotide salvage	5/1569	16/28814	0.00125353535573974	0.00812334029671639	0.00587295822299895	Impdh2/Adss/Gmps/Adk/Hprt	5
GO:1902165	GO:1902165	regulation of intrinsic apoptotic signaling pathway in response to DNA damage by p53 class mediator	5/1569	16/28814	0.00125353535573974	0.00812334029671639	0.00587295822299895	Kdm1a/Mif/Hnrnpk/Atad5/Sirt1	5
GO:0045185	GO:0045185	maintenance of protein location	14/1569	102/28814	0.00126094047195315	0.00816130182767221	0.00590040339668873	Hnrnpu/Hspa5/Park7/Ccdc88a/Cops9/Pfn1/Vps13a/Kdelr2/Chchd10/Tmsb15b2/Faf1/Topors/Mprip/Tmsb4x	14
GO:0032436	GO:0032436	positive regulation of proteasomal ubiquitin-dependent protein catabolic process	13/1569	91/28814	0.00127886008198575	0.00825702194917357	0.00596960648976919	Rack1/Sumo2/Rbx1/Sumo1/Vcp/Ube2v2/Cdc20/Gclc/Mdm2/Cop1/Arih1/Stub1/Bcap31	13
GO:0043242	GO:0043242	negative regulation of protein-containing complex disassembly	13/1569	91/28814	0.00127886008198575	0.00825702194917357	0.00596960648976919	Mphosph8/Cfl1/Arpc2/Taok1/Hdgfl3/Sptan1/Tpx2/Mtpn/Capza2/Add3/Eml4/Apc/Rdx	13
GO:0030111	GO:0030111	regulation of Wnt signaling pathway	31/1569	318/28814	0.00130486052313787	0.0084145956718243	0.00608352808561126	Wnk1/Atp6v0c/Ube2b/Pfdn5/Usp34/Caprin2/Snx3/Vcp/Usp47/Hdac1/Csnk2a1/Mdk/Cyld/Pin1/Vps35/Macf1/Smarca4/Csnk1a1/Ctnnb1/Ubr5/Usp8/Ift20/G3bp1/Zranb1/Hdac2/Apc/Chd8/Lrp6/App/Ruvbl1/Cdc73	31
GO:0009299	GO:0009299	mRNA transcription	9/1569	50/28814	0.00136067961485397	0.00876384001020106	0.00633602242094456	Ddx5/Taf4b/Taf7/Atf2/Hnrnpd/Taf10/Eef1d/Atf1/Taf11	9
GO:0055076	GO:0055076	transition metal ion homeostasis	17/1569	138/28814	0.00138604776917014	0.00891634388094209	0.00644627864917001	Fth1/Sod1/Ftl1/Atp6v1g1/Sod2/Hmox2/Fbxl5/Atox1/Aplp2/Bola2/Ndfip1/Glrx3/Tmem199/Hif1a/Commd1/App/Ccdc115	17
GO:0031032	GO:0031032	actomyosin structure organization	23/1569	213/28814	0.00140435273543524	0.00895637616566178	0.00647522092256276	Actg1/Rock1/Stmn1/Rock2/Cdc42/Cul3/Ccdc88a/Epb41l2/Pak2/Cdc42bpa/Prkar1a/Pfn1/Cfl2/Rhoa/Rac1/Pak1/Alms1/Mef2a/Tmsb15b2/Trpm7/Hdac2/Tjp1/Bag4	23
GO:0009157	GO:0009157	deoxyribonucleoside monophosphate biosynthetic process	4/1569	10/28814	0.00141094760069478	0.00895637616566178	0.00647522092256276	Nme2/Dut/Nme1/Adk	4
GO:0010216	GO:0010216	maintenance of DNA methylation	4/1569	10/28814	0.00141094760069478	0.00895637616566178	0.00647522092256276	Hells/Kcnq1ot1/Usp7/Uhrf2	4
GO:0033314	GO:0033314	mitotic DNA replication checkpoint signaling	4/1569	10/28814	0.00141094760069478	0.00895637616566178	0.00647522092256276	Topbp1/Nae1/Rad17/Clspn	4
GO:0035562	GO:0035562	negative regulation of chromatin binding	4/1569	10/28814	0.00141094760069478	0.00895637616566178	0.00647522092256276	Wapl/Senp2/Larp7/Btaf1	4
GO:0036480	GO:0036480	neuron intrinsic apoptotic signaling pathway in response to oxidative stress	4/1569	10/28814	0.00141094760069478	0.00895637616566178	0.00647522092256276	Park7/Fbxw7/Parp1/Hif1a	4
GO:0048280	GO:0048280	vesicle fusion with Golgi apparatus	4/1569	10/28814	0.00141094760069478	0.00895637616566178	0.00647522092256276	Bet1/Yipf4/Vti1b/Sec22b	4
GO:0070601	GO:0070601	centromeric sister chromatid cohesion	4/1569	10/28814	0.00141094760069478	0.00895637616566178	0.00647522092256276	Bub1/Naa50/Ctnnb1/Sgo2a	4
GO:0070933	GO:0070933	histone H4 deacetylation	4/1569	10/28814	0.00141094760069478	0.00895637616566178	0.00647522092256276	Hdac1/Baz2a/Hdac2/Smarcad1	4
GO:1903376	GO:1903376	regulation of oxidative stress-induced neuron intrinsic apoptotic signaling pathway	4/1569	10/28814	0.00141094760069478	0.00895637616566178	0.00647522092256276	Park7/Fbxw7/Parp1/Hif1a	4
GO:1903749	GO:1903749	positive regulation of establishment of protein localization to mitochondrion	4/1569	10/28814	0.00141094760069478	0.00895637616566178	0.00647522092256276	Tomm7/Pdcd5/Sh3glb1/Fbxw7	4
GO:0051085	GO:0051085	chaperone cofactor-dependent protein refolding	7/1569	32/28814	0.00141665559544105	0.00896026170977402	0.00647803006725094	Hspa8/Hspa5/Ptges3/Hspe1/Hspa9/Hspa2/St13	7
GO:0055022	GO:0055022	negative regulation of cardiac muscle tissue growth	7/1569	32/28814	0.00141665559544105	0.00896026170977402	0.00647803006725094	Tomm70a/Jarid2/Pak1/Yy1/Hdac2/Apc/Rbp4	7
GO:0061117	GO:0061117	negative regulation of heart growth	7/1569	32/28814	0.00141665559544105	0.00896026170977402	0.00647803006725094	Tomm70a/Jarid2/Pak1/Yy1/Hdac2/Apc/Rbp4	7
GO:0051693	GO:0051693	actin filament capping	8/1569	41/28814	0.00144928014332168	0.00915563204313998	0.00661927760385057	Mphosph8/Cfl1/Arpc2/Sptan1/Mtpn/Capza2/Add3/Rdx	8
GO:0120034	GO:0120034	positive regulation of plasma membrane bounded cell projection assembly	15/1569	115/28814	0.00145680421754037	0.00919215579847543	0.00664568330414098	Dynll1/Fmr1/Cfl1/Cdc42/Ccp110/Ccdc88a/Arpc2/Brk1/Rala/Fnbp1l/Pfn1/Rac1/Auts2/Akirin1/Apc	15
GO:0008090	GO:0008090	retrograde axonal transport	6/1569	24/28814	0.00148699403487832	0.00934909837185119	0.00675914859590259	Pafah1b1/Sod1/Kif1b/Kif5b/Actr10/Dync1h1	6
GO:0051882	GO:0051882	mitochondrial depolarization	6/1569	24/28814	0.00148699403487832	0.00934909837185119	0.00675914859590259	Rack1/Gclm/Parp1/Gclc/Atpif1/Oga	6
GO:1990000	GO:1990000	amyloid fibril formation	6/1569	24/28814	0.00148699403487832	0.00934909837185119	0.00675914859590259	Pfdn2/Pfdn5/Pfdn4/Pfdn6/Mdm2/App	6
GO:0030177	GO:0030177	positive regulation of Wnt signaling pathway	17/1569	139/28814	0.00150077829667115	0.00942453037492897	0.00681368392085162	Wnk1/Atp6v0c/Ube2b/Usp34/Caprin2/Vcp/Usp47/Csnk2a1/Pin1/Vps35/Macf1/Smarca4/Ubr5/Usp8/Zranb1/Ruvbl1/Cdc73	17
GO:0021885	GO:0021885	forebrain cell migration	11/1569	71/28814	0.00151530501937944	0.00949315199195552	0.00686329551845445	Pafah1b1/Rtn4/Pex13/Rhoa/Rac1/Rnf7/Srgap2/Ctnnb1/Cul5/Arl13b/Lrp6	11
GO:0051568	GO:0051568	histone H3-K4 methylation	11/1569	71/28814	0.00151530501937944	0.00949315199195552	0.00686329551845445	Kdm1a/Ash1l/Kmt2a/Prdm9/Auts2/Kmt2e/Ctnnb1/Kmt2c/Ctr9/Nelfe/Phf20	11
GO:0008089	GO:0008089	anterograde axonal transport	9/1569	51/28814	0.00157362181216224	0.00982349711142701	0.0071021262229384	Fmr1/Sod1/Kif1b/Spg7/Kif5b/Spast/Kif3a/Ap3s1/Mapk8ip3	9
GO:0030520	GO:0030520	intracellular estrogen receptor signaling pathway	9/1569	51/28814	0.00157362181216224	0.00982349711142701	0.0071021262229384	Ddx5/Taf7/Strn3/Ddx17/Pak1/Parp1/Safb/Phb2/Ufm1	9
GO:0032392	GO:0032392	DNA geometric change	9/1569	51/28814	0.00157362181216224	0.00982349711142701	0.0071021262229384	Hmgb1/Hnrnpa2b1/Top2a/Dhx36/Rad50/Ascc3/Pura/Mcm5/Mcm8	9
GO:0007091	GO:0007091	metaphase/anaphase transition of mitotic cell cycle	10/1569	61/28814	0.00158133574669022	0.00983672884881002	0.00711169241591194	Tpr/Bub1/Cul3/Anapc5/Cenpe/Ik/Tex14/Apc/Anapc11/Zfp207	10
GO:0048599	GO:0048599	oocyte development	10/1569	61/28814	0.00158133574669022	0.00983672884881002	0.00711169241591194	Dazl/H3f3a/Brca2/Tut4/Meioc/Dmc1/Ythdc2/Tdrkh/Ythdf2/Ctnnb1	10
GO:1902099	GO:1902099	regulation of metaphase/anaphase transition of cell cycle	10/1569	61/28814	0.00158133574669022	0.00983672884881002	0.00711169241591194	Tpr/Bub1/Cul3/Anapc5/Cenpe/Ik/Tex14/Apc/Anapc11/Zfp207	10
GO:0030038	GO:0030038	contractile actin filament bundle assembly	15/1569	116/28814	0.00159065539777307	0.00987142026265052	0.0071367733822066	Actg1/Stmn1/Rock2/Cdc42/Cul3/Ccdc88a/Pak2/Pfn1/Rhoa/Rac1/Pak1/Alms1/Tmsb15b2/Tjp1/Bag4	15
GO:0043149	GO:0043149	stress fiber assembly	15/1569	116/28814	0.00159065539777307	0.00987142026265052	0.0071367733822066	Actg1/Stmn1/Rock2/Cdc42/Cul3/Ccdc88a/Pak2/Pfn1/Rhoa/Rac1/Pak1/Alms1/Tmsb15b2/Tjp1/Bag4	15
GO:0008064	GO:0008064	regulation of actin polymerization or depolymerization	19/1569	165/28814	0.00168069713144106	0.0104179522542322	0.00753190142520993	Mphosph8/Cfl1/Arpc1a/Arpc2/Rasa1/Brk1/Sptan1/Arpc5l/Pfn1/Cfl2/Rhoa/Rac1/Mtpn/Capza2/Add3/Tmsb15b2/Rdx/Tmsb4x/Bag4	19
GO:0001967	GO:0001967	suckling behavior	5/1569	17/28814	0.00169673037532119	0.0104559027217515	0.0075593386003304	Gls/Aplp2/Pex13/Ube2q1/App	5
GO:0006337	GO:0006337	nucleosome disassembly	5/1569	17/28814	0.00169673037532119	0.0104559027217515	0.0075593386003304	Supt16/Smarcc1/Smarce1/Smarca4/Smarcd1	5
GO:0043923	GO:0043923	positive regulation by host of viral transcription	5/1569	17/28814	0.00169673037532119	0.0104559027217515	0.0075593386003304	Smarca4/Nucks1/Rrp1b/Taf11/Ep300	5
GO:0051382	GO:0051382	kinetochore assembly	5/1569	17/28814	0.00169673037532119	0.0104559027217515	0.0075593386003304	Cenpw/Senp6/Rnf4/Cenpe/Cenpk	5
GO:0071696	GO:0071696	ectodermal placode development	5/1569	17/28814	0.00169673037532119	0.0104559027217515	0.0075593386003304	Gnas/Hdac1/Ctnnb1/Hdac2/Lrp6	5
GO:0032527	GO:0032527	protein exit from endoplasmic reticulum	8/1569	42/28814	0.00170602065538619	0.0104886468032193	0.00758301169729378	Sec61b/Erlec1/Vcp/Sar1a/Gcc2/Tmem30a/Faf2/Bcap31	8
GO:1900181	GO:1900181	negative regulation of protein localization to nucleus	8/1569	42/28814	0.00170602065538619	0.0104886468032193	0.00758301169729378	Sumo1/Pkig/Maged1/Ctnna1/Ppp2ca/Sirt1/App/Ufm1	8
GO:0055072	GO:0055072	iron ion homeostasis	13/1569	94/28814	0.0017286232814598	0.0106152360997677	0.00767453238003658	Fth1/Sod1/Ftl1/Atp6v1g1/Sod2/Hmox2/Fbxl5/Bola2/Ndfip1/Glrx3/Tmem199/Hif1a/Ccdc115	13
GO:0007041	GO:0007041	lysosomal transport	15/1569	117/28814	0.00173463542049905	0.0106397695850378	0.00769226943508942	Hspa8/Hook1/Vcp/Arf1/Vps35/Vps4b/Tsg101/Zfyve16/Chmp4b/Gcc2/Nedd4/Snx27/Lamp1/Ap1g1/Lamp2	15
GO:0046777	GO:0046777	protein autophosphorylation	25/1569	243/28814	0.00176589949936249	0.010818954540229	0.00782181537525558	Hspa8/Wnk1/Eif2s1/Nme2/Atr/Calm1/Cdk12/Slk/Stk25/Rb1cc1/Taok1/Hspa9/Rad50/Csnk2a1/Calm2/Calm3/Pak2/Ptk2/Mark3/Pikfyve/Pak1/Stk17b/Ppp2ca/Trpm7/Trim28	25
GO:0000302	GO:0000302	response to reactive oxygen species	21/1569	191/28814	0.00177199532049142	0.0108341636917401	0.00783281118586667	Rack1/Prdx1/Cfl1/Sod1/Park7/Stk25/Sod2/Pdcd10/Ezh2/Romo1/Lig1/Akr1b3/Parp1/Hif1a/Kpna4/Prdx5/Hdac2/Chuk/Setx/Sirt1/Dhfr	21
GO:0016055	GO:0016055	Wnt signaling pathway	40/1569	451/28814	0.00177248971866762	0.0108341636917401	0.00783281118586667	Wnk1/Atp6v0c/Ube2b/Rnf138/Cul3/Pfdn5/Usp34/Caprin2/Snx3/Vcp/Usp47/Hdac1/Csnk2a1/Csnk2a2/Senp2/Mdk/Cyld/Pin1/Vps35/Macf1/Smarca4/Brd7/Csnk1a1/Rac1/Ctnnb1/Ubr5/Usp8/Ift20/G3bp1/Ctr9/Zranb1/Rab5a/Hdac2/Apc/Chd8/Ddb1/Lrp6/App/Ruvbl1/Cdc73	40
GO:0010965	GO:0010965	regulation of mitotic sister chromatid separation	10/1569	62/28814	0.00179498802075456	0.0109589835757874	0.00792305263059669	Tpr/Bub1/Cul3/Anapc5/Cenpe/Ik/Tex14/Apc/Anapc11/Zfp207	10
GO:2000059	GO:2000059	negative regulation of ubiquitin-dependent protein catabolic process	9/1569	52/28814	0.00181248326632551	0.0110530048900197	0.00799102753136273	Hsp90ab1/Ubxn1/Park7/Smarcc1/Csnk2a1/Csnk2a2/Eif3h/Rybp/Usp7	9
GO:2000679	GO:2000679	positive regulation of transcription regulatory region DNA binding	6/1569	25/28814	0.00186733040419793	0.0113743278084804	0.00822333542531796	Park7/Lamtor5/Ctnnb1/Parp1/Gtf2b/Ep300	6
GO:0042692	GO:0042692	muscle cell differentiation	39/1569	438/28814	0.00187121170431183	0.0113848232298096	0.00823092333481667	H3f3b/H3f3a/Actg1/Cacybp/Eif5a/Hnrnpu/Ybx1/Kras/Kdm1a/Qk/Tomm70a/Naca/Pbrm1/Sod2/Ezh2/Ankrd17/Pin1/Hdgfl2/Smarca4/Prkar1a/Atp2a2/Cfl2/Ddx39b/Pak1/Yy1/Ctnnb1/Ift88/Setd3/Bnip2/Med28/Spag9/Ift20/Rbpms2/Mef2a/Hdac2/Chuk/Mdm2/Sirt1/Tmsb4x	39
GO:0038061	GO:0038061	NIK/NF-kappaB signaling	15/1569	118/28814	0.00188932897682682	0.0114818091621676	0.00830104157536209	Calr/Prdx1/Hmgb1/Ndufc2/Zfp91/Nfat5/Cyld/Rhoa/Cops8/Phb2/Chuk/Rc3h2/Ep300/App/Trim44	15
GO:0051495	GO:0051495	positive regulation of cytoskeleton organization	22/1569	205/28814	0.00190513372430551	0.0115643210908081	0.00836069549753008	Rock2/Ckap5/Cfl1/Cdc42/Pfdn2/Ccdc88a/Arpc2/Brk1/Vps4b/Akap9/Pfn1/Cfl2/Rhoa/Rac1/Mapre1/Pak1/Add3/Dync1h1/Cep295/Apc/Plk4/Bag4	22
GO:0098586	GO:0098586	cellular response to virus	11/1569	73/28814	0.00190729087184891	0.0115643210908081	0.00836069549753008	Hsp90aa1/Fmr1/Tomm70a/Ankrd17/Usp15/Gbf1/Atf2/Rrp1b/Hif1a/Phb2/Chuk	11
GO:0198738	GO:0198738	cell-cell signaling by wnt	40/1569	453/28814	0.0019202740173376	0.0116296732967346	0.00840794339816801	Wnk1/Atp6v0c/Ube2b/Rnf138/Cul3/Pfdn5/Usp34/Caprin2/Snx3/Vcp/Usp47/Hdac1/Csnk2a1/Csnk2a2/Senp2/Mdk/Cyld/Pin1/Vps35/Macf1/Smarca4/Brd7/Csnk1a1/Rac1/Ctnnb1/Ubr5/Usp8/Ift20/G3bp1/Ctr9/Zranb1/Rab5a/Hdac2/Apc/Chd8/Ddb1/Lrp6/App/Ruvbl1/Cdc73	40
GO:0072175	GO:0072175	epithelial tube formation	19/1569	167/28814	0.0019332888445903	0.0116950672651535	0.00845522149197326	Luzp1/Rock2/Cfl1/Tmed2/Spint2/Brd2/Rala/Hectd1/Pfn1/Gatad2a/Ctnnb1/Kif20b/Kdm2a/Hif1a/Enah/Cecr2/Kdm2b/Lrp6/Setd2	19
GO:1901983	GO:1901983	regulation of protein acetylation	12/1569	84/28814	0.00193606139367565	0.0116984236559439	0.00845764807293286	Park7/Iws1/Taok1/Kmt2a/Taf7/Brd7/Zfp451/Auts2/Cep295/Hdac2/Sirt1/App	12
GO:0009124	GO:0009124	nucleoside monophosphate biosynthetic process	8/1569	43/28814	0.00199739418828431	0.0120414335350854	0.00870563506063646	Nme2/Impdh2/Adss/Dut/Gmps/Nme1/Adk/Hprt	8
GO:0061462	GO:0061462	protein localization to lysosome	8/1569	43/28814	0.00199739418828431	0.0120414335350854	0.00870563506063646	Hspa8/Rock2/Rtn4/Lamtor5/Zfyve16/Gcc2/Nedd4/Lamp2	8
GO:0010658	GO:0010658	striated muscle cell apoptotic process	10/1569	63/28814	0.00203136893200547	0.0122183251041378	0.00883352294383461	Npm1/Hspa8/Eif5a/Qk/Naca/Gnb1/Pdpk1/Mdk/Sirt1/Pcmt1	10
GO:0035306	GO:0035306	positive regulation of dephosphorylation	10/1569	63/28814	0.00203136893200547	0.0122183251041378	0.00883352294383461	Ppia/Hsp90ab1/Rock1/Calm1/Camta1/Ppp1r12a/Calm2/Pin1/Calm3/Ppp2ca	10
GO:0051973	GO:0051973	positive regulation of telomerase activity	7/1569	34/28814	0.00205890763854408	0.0123557881607736	0.00893290506490056	Hsp90ab1/Hsp90aa1/Ptges3/Cct2/Cct4/Tcp1/Ctnnb1	7
GO:1901020	GO:1901020	negative regulation of calcium ion transmembrane transporter activity	7/1569	34/28814	0.00205890763854408	0.0123557881607736	0.00893290506490056	Fmr1/1810037I17Rik/Calm1/Ywhae/Calm2/Calm3/Ppp2ca	7
GO:0030832	GO:0030832	regulation of actin filament length	19/1569	168/28814	0.00207114180653626	0.0124150829880441	0.00897577364244125	Mphosph8/Cfl1/Arpc1a/Arpc2/Rasa1/Brk1/Sptan1/Arpc5l/Pfn1/Cfl2/Rhoa/Rac1/Mtpn/Capza2/Add3/Tmsb15b2/Rdx/Tmsb4x/Bag4	19
GO:0009221	GO:0009221	pyrimidine deoxyribonucleotide biosynthetic process	4/1569	11/28814	0.00212195467772609	0.0126050798705013	0.00911313631745095	Nme2/Dut/Cmpk1/Nme1	4
GO:0032263	GO:0032263	GMP salvage	4/1569	11/28814	0.00212195467772609	0.0126050798705013	0.00911313631745095	Impdh2/Gmps/Adk/Hprt	4
GO:0034770	GO:0034770	histone H4-K20 methylation	4/1569	11/28814	0.00212195467772609	0.0126050798705013	0.00911313631745095	Arid4b/Nsd2/Baz2a/Kmt5b	4
GO:0061635	GO:0061635	regulation of protein complex stability	4/1569	11/28814	0.00212195467772609	0.0126050798705013	0.00911313631745095	Hspa8/Ecsit/Scoc/Snf8	4
GO:0097494	GO:0097494	regulation of vesicle size	4/1569	11/28814	0.00212195467772609	0.0126050798705013	0.00911313631745095	Ap2m1/Rab11a/Rab5a/Rab22a	4
GO:1901030	GO:1901030	positive regulation of mitochondrial outer membrane permeabilization involved in apoptotic signaling pathway	4/1569	11/28814	0.00212195467772609	0.0126050798705013	0.00911313631745095	Siva1/Sh3glb1/Chchd10/Atpif1	4
GO:1902915	GO:1902915	negative regulation of protein polyubiquitination	4/1569	11/28814	0.00212195467772609	0.0126050798705013	0.00911313631745095	Ppia/Trip12/Ubr5/Trim44	4
GO:1903332	GO:1903332	regulation of protein folding	4/1569	11/28814	0.00212195467772609	0.0126050798705013	0.00911313631745095	Hspa8/Pdcd5/Pdia3/St13	4
GO:0036294	GO:0036294	cellular response to decreased oxygen levels	16/1569	132/28814	0.00223373480566332	0.0131717532685091	0.0095228260597273	Rock2/Higd1a/Gnb1/Chchd2/Rtn4/Atf2/P4hb/Pdk3/Hif1a/Bnip3l/Tmbim6/Usp19/Fam162a/Commd1/Sirt1/Stub1	16
GO:0061008	GO:0061008	hepaticobiliary system development	16/1569	132/28814	0.00223373480566332	0.0131717532685091	0.0095228260597273	Mki67/Nipbl/Cul3/Sod2/Rb1cc1/Rtn4/Jarid2/Ezh2/Mdk/Sec63/Smarca4/Cadm1/Atf2/Taf10/Ift88/Pkm	16
GO:0009200	GO:0009200	deoxyribonucleoside triphosphate metabolic process	5/1569	18/28814	0.00224481633903122	0.0131717532685091	0.0095228260597273	Dctpp1/Dut/Adk/Ak2/Oga	5
GO:0009263	GO:0009263	deoxyribonucleotide biosynthetic process	5/1569	18/28814	0.00224481633903122	0.0131717532685091	0.0095228260597273	Nme2/Dut/Cmpk1/Nme1/Adk	5
GO:0009265	GO:0009265	2'-deoxyribonucleotide biosynthetic process	5/1569	18/28814	0.00224481633903122	0.0131717532685091	0.0095228260597273	Nme2/Dut/Cmpk1/Nme1/Adk	5
GO:0031468	GO:0031468	nuclear membrane reassembly	5/1569	18/28814	0.00224481633903122	0.0131717532685091	0.0095228260597273	Banf1/Spast/Chmp4b/Nsfl1c/Ubxn2a	5
GO:0032261	GO:0032261	purine nucleotide salvage	5/1569	18/28814	0.00224481633903122	0.0131717532685091	0.0095228260597273	Impdh2/Adss/Gmps/Adk/Hprt	5
GO:0035092	GO:0035092	sperm DNA condensation	5/1569	18/28814	0.00224481633903122	0.0131717532685091	0.0095228260597273	Sycp1/1700013H16Rik/Sycp3/Selenof/Xlr	5
GO:0046385	GO:0046385	deoxyribose phosphate biosynthetic process	5/1569	18/28814	0.00224481633903122	0.0131717532685091	0.0095228260597273	Nme2/Dut/Cmpk1/Nme1/Adk	5
GO:1902176	GO:1902176	negative regulation of oxidative stress-induced intrinsic apoptotic signaling pathway	5/1569	18/28814	0.00224481633903122	0.0131717532685091	0.0095228260597273	Ppia/Park7/Sod2/Hif1a/Sirt1	5
GO:1905146	GO:1905146	lysosomal protein catabolic process	5/1569	18/28814	0.00224481633903122	0.0131717532685091	0.0095228260597273	Vps35/Vps13a/Tmem199/Ccdc115/Lamp2	5
GO:0035148	GO:0035148	tube formation	20/1569	182/28814	0.00226237808915979	0.0132600493559088	0.00958666177429933	Luzp1/Rock2/Cfl1/Tmed2/Spint2/Brd2/Rala/Hectd1/Pfn1/Ywhaz/Gatad2a/Ctnnb1/Kif20b/Kdm2a/Hif1a/Enah/Cecr2/Kdm2b/Lrp6/Setd2	20
GO:0032869	GO:0032869	cellular response to insulin stimulus	22/1569	208/28814	0.00228699847820337	0.0133894749972506	0.00968023305862587	Srsf3/Ybx1/Hnrnpk/Eprs/Syap1/Smarcc1/Atp2b1/Nucks1/Gnai2/Rab10/Slc25a33/Uchl3/Pak1/Ptpra/Ptpn2/Parp1/Appl1/Zfp106/Pkm/Apc/Sirt1/Osbpl8	22
GO:0044784	GO:0044784	metaphase/anaphase transition of cell cycle	10/1569	64/28814	0.00229219283477489	0.0134050079860727	0.00969146299496957	Tpr/Bub1/Cul3/Anapc5/Cenpe/Ik/Tex14/Apc/Anapc11/Zfp207	10
GO:0090559	GO:0090559	regulation of membrane permeability	13/1569	97/28814	0.00230178242410292	0.0134461819348205	0.0097212306609837	Hspa8/Slc25a31/Siva1/Vdac2/Sh3glb1/Spg7/Atf2/Mtch2/Chchd10/Dynlt1b/Bnip3l/Gclc/Atpif1	13
GO:0033233	GO:0033233	regulation of protein sumoylation	6/1569	26/28814	0.00231693954271852	0.0134899073817221	0.00975284299206367	Ube2i/Park7/Uba2/Sae1/Ctnnb1/Gnl3	6
GO:0071459	GO:0071459	protein localization to chromosome, centromeric region	6/1569	26/28814	0.00231693954271852	0.0134899073817221	0.00975284299206367	H3f3a/Knl1/Jarid2/Smc5/Cdk1/Ik	6
GO:1902230	GO:1902230	negative regulation of intrinsic apoptotic signaling pathway in response to DNA damage	6/1569	26/28814	0.00231693954271852	0.0134899073817221	0.00975284299206367	Tpt1/Kdm1a/Mif/Atad5/Usp47/Sirt1	6
GO:0046621	GO:0046621	negative regulation of organ growth	8/1569	44/28814	0.00232654098994106	0.0135308751068788	0.00978246156392558	Tomm70a/Jarid2/Ptk2/Pak1/Yy1/Hdac2/Apc/Rbp4	8
GO:0043648	GO:0043648	dicarboxylic acid metabolic process	12/1569	86/28814	0.00237160953872175	0.0137636800011312	0.0099507732889196	Gclm/Gls/Adss/Aasdhppt/Sdhb/Dld/Gclc/Apc/Mrps36/Suclg1/Dhfr/Sdha	12
GO:0043433	GO:0043433	negative regulation of DNA-binding transcription factor activity	19/1569	170/28814	0.00237178864853616	0.0137636800011312	0.0099507732889196	Tut4/Tax1bp1/Kdm1a/Sumo1/Siva1/Trim37/Ezh2/Cyld/Med13/Pura/Usp7/Phb2/Hdac2/Chuk/Peli1/Faf1/Commd1/Sirt1/Rnf2	19
GO:1905897	GO:1905897	regulation of response to endoplasmic reticulum stress	11/1569	75/28814	0.00237804780016015	0.0137848375229064	0.00996606961246989	Manf/Pdia6/Ubxn1/Park7/Ptpn2/Tmbim6/Usp19/Sirt1/App/Serinc3/Bcap31	11
GO:0140053	GO:0140053	mitochondrial gene expression	14/1569	109/28814	0.00239048641689462	0.013841729801448	0.0100072012114035	Ndufa7/Mrpl52/Uqcc2/Mrpl51/Chchd1/Malsu1/Mrps17/Slc25a33/Mrpl57/Mrps14/Mrps16/Mrps21/Chchd10/Tfam	14
GO:0043087	GO:0043087	regulation of GTPase activity	32/1569	345/28814	0.00244175681868552	0.0141231000203576	0.0102106243699188	Rack1/Pafah1b1/Wnk1/Stmn1/Sod1/Eif2s1/Tmed2/Eif5/Gnas/Zc3h15/Rasa1/Myo9a/Rapgef6/Ezh2/Lars/Pin1/Trappc6b/Arhgap29/Srgap2/Rrp1b/Rabgap1/Dynlt1b/Pip5k1a/Fgd6/Rabgap1l/Afdn/Arhgap12/Rdx/Evi5/Rasa2/Rab11fip2/Ralgapa1	32
GO:0010667	GO:0010667	negative regulation of cardiac muscle cell apoptotic process	7/1569	35/28814	0.00245434863158061	0.0141648676494395	0.0102408212509692	Npm1/Hspa8/Qk/Pdpk1/Mdk/Sirt1/Pcmt1	7
GO:1903203	GO:1903203	regulation of oxidative stress-induced neuron death	7/1569	35/28814	0.00245434863158061	0.0141648676494395	0.0102408212509692	Rack1/Park7/Fbxw7/Ctnnb1/Parp1/Hif1a/App	7
GO:0048638	GO:0048638	regulation of developmental growth	36/1569	402/28814	0.00248413862689013	0.0143211270566617	0.0103537926318354	Pafah1b1/Cfl1/Sod1/Nipbl/Atp5g1/Tomm70a/Hnrnpk/Naca/Golga4/Gnas/Rtn4/Jarid2/Mael/Sh3glb1/Pin1/Macf1/Itsn2/Ptk2/Cdk1/Ddx39b/Pak1/Yy1/Ppib/Alms1/Celf1/Wdr36/Atxn2/Afdn/Rab11a/Ncor1/Hdac2/Apc/Sirt1/Adnp/App/Rbp4	36
GO:1904063	GO:1904063	negative regulation of cation transmembrane transport	13/1569	98/28814	0.00252433769171029	0.014536988344729	0.0105098545817817	Fmr1/1810037I17Rik/Calm1/Park7/Sumo1/Ywhae/Pik3c2a/Calm2/Calm3/Nedd4/Snx27/Ppp2ca/Commd1	13
GO:0030833	GO:0030833	regulation of actin filament polymerization	17/1569	146/28814	0.00255000068357733	0.0146687607479503	0.0106051225123121	Mphosph8/Cfl1/Arpc1a/Arpc2/Rasa1/Sptan1/Arpc5l/Pfn1/Rhoa/Rac1/Mtpn/Capza2/Add3/Tmsb15b2/Rdx/Tmsb4x/Bag4	17
GO:0009994	GO:0009994	oocyte differentiation	10/1569	65/28814	0.00257923916860763	0.0148046644335204	0.010703377249717	Dazl/H3f3a/Brca2/Tut4/Meioc/Dmc1/Ythdc2/Tdrkh/Ythdf2/Ctnnb1	10
GO:0051306	GO:0051306	mitotic sister chromatid separation	10/1569	65/28814	0.00257923916860763	0.0148046644335204	0.010703377249717	Tpr/Bub1/Cul3/Anapc5/Cenpe/Ik/Tex14/Apc/Anapc11/Zfp207	10
GO:0007088	GO:0007088	regulation of mitotic nuclear division	14/1569	110/28814	0.00260486320223051	0.0149354928171369	0.010797962679269	Tpr/Mki67/Bub1/Cdc42/Cul3/Cdk11b/Anapc5/Cenpe/Ik/Kif20b/Tex14/Apc/Anapc11/Zfp207	14
GO:0032410	GO:0032410	negative regulation of transporter activity	12/1569	87/28814	0.00261756987179398	0.0149920532830763	0.0108388543865474	Fmr1/1810037I17Rik/Calm1/Park7/Sumo1/Ywhae/Calm2/Calm3/Ndfip1/Nedd4/Snx27/Ppp2ca	12
GO:0010769	GO:0010769	regulation of cell morphogenesis involved in differentiation	15/1569	122/28814	0.00262766502284314	0.0150172621836377	0.010857079748829	Calr/Pafah1b1/Cdc42/Ttc3/Caprin2/Dhx36/Arpc2/Caprin1/Mdk/Sh3glb1/Ptk2/Rac1/P4hb/Cux1/Afdn	15
GO:0042177	GO:0042177	negative regulation of protein catabolic process	15/1569	122/28814	0.00262766502284314	0.0150172621836377	0.010857079748829	Hsp90ab1/Ubxn1/Park7/Mycbp2/Snx3/Smarcc1/Csnk2a1/Csnk2a2/Pin1/Vps35/Eif3h/Rybp/Gabarapl2/Usp7/Usp19	15
GO:0032543	GO:0032543	mitochondrial translation	11/1569	76/28814	0.00264639521278567	0.0151079380383597	0.0109226359716592	Ndufa7/Mrpl52/Uqcc2/Mrpl51/Chchd1/Malsu1/Mrps17/Mrpl57/Mrps14/Mrps16/Mrps21	11
GO:0042771	GO:0042771	intrinsic apoptotic signaling pathway in response to DNA damage by p53 class mediator	8/1569	45/28814	0.0026967212963378	0.0153619922658552	0.0111063103974444	Brca2/Kdm1a/Mif/Hnrnpk/Atad5/Ep300/Sirt1/Topors	8
GO:0072583	GO:0072583	clathrin-dependent endocytosis	8/1569	45/28814	0.0026967212963378	0.0153619922658552	0.0111063103974444	Smap1/Itsn2/Fnbp1l/Fcho2/Cltc/Ap2m1/Canx/Clta	8
GO:0016331	GO:0016331	morphogenesis of embryonic epithelium	20/1569	185/28814	0.0027400617537328	0.0155920450387708	0.011272632412166	Luzp1/Rock2/Cfl1/Tmed2/Spint2/Brd2/Rala/Hectd1/Pfn1/Gatad2a/Ctnnb1/Kif20b/Kdm2a/Hif1a/Enah/Cecr2/Grsf1/Kdm2b/Lrp6/Setd2	20
GO:0021915	GO:0021915	neural tube development	21/1569	198/28814	0.00274651014304364	0.015611897634219	0.0112869853088102	Luzp1/Rock2/Cfl1/Tmed2/Spint2/Brd2/Rala/Hectd1/Pfn1/Gatad2a/Kif3a/Kif20b/Kdm2a/Arl13b/Hif1a/Enah/Bmi1/Cecr2/Kdm2b/Lrp6/Setd2	21
GO:1903321	GO:1903321	negative regulation of protein modification by small protein conjugation or removal	13/1569	99/28814	0.00276420514453832	0.0156955674245852	0.0113474763341027	Ppia/Dnaja1/Ubxn1/Park7/Trip12/Senp2/Cops9/Ctnnb1/Ubr5/Cdc20/Gtpbp4/Gclc/Trim44	13
GO:0046916	GO:0046916	cellular transition metal ion homeostasis	14/1569	111/28814	0.00283480086958363	0.0160791124591975	0.0116247691573305	Fth1/Sod1/Ftl1/Atp6v1g1/Atox1/Aplp2/Bola2/Ndfip1/Glrx3/Tmem199/Hif1a/Commd1/App/Ccdc115	14
GO:0032069	GO:0032069	regulation of nuclease activity	6/1569	27/28814	0.0028433755390361	0.0160931394510895	0.0116349102980888	Npm1/Hmgb1/Hmgb2/Pcna/Tmbim6/Sirt1	6
GO:0051016	GO:0051016	barbed-end actin filament capping	6/1569	27/28814	0.0028433755390361	0.0160931394510895	0.0116349102980888	Mphosph8/Cfl1/Arpc2/Mtpn/Capza2/Add3	6
GO:0051651	GO:0051651	maintenance of location in cell	23/1569	225/28814	0.0028559013247383	0.0161467089903478	0.0116736396452043	Tex101/Fth1/Pafah1b1/Dbi/Hnrnpu/Ftl1/Hspa5/Calm1/Park7/Ccdc88a/Fkbp1a/Calm2/Calm3/Akap9/Pfn1/Vps13a/Kdelr2/Chchd10/Ibtk/Tmsb15b2/Topors/Mprip/Tmsb4x	23
GO:0006623	GO:0006623	protein targeting to vacuole	7/1569	36/28814	0.00290570158501724	0.0162593753102047	0.0117550943874027	Hspa8/Vps13a/Zfyve16/Vps37a/Gcc2/Nedd4/Lamp2	7
GO:0010922	GO:0010922	positive regulation of phosphatase activity	7/1569	36/28814	0.00290570158501724	0.0162593753102047	0.0117550943874027	Hsp90ab1/Rock1/Calm1/Ppp1r12a/Calm2/Calm3/Ppp2ca	7
GO:0090312	GO:0090312	positive regulation of protein deacetylation	7/1569	36/28814	0.00290570158501724	0.0162593753102047	0.0117550943874027	Smarca5/Nipbl/Baz2a/Akap8l/Ncor1/Sirt1/BC004004	7
GO:1902745	GO:1902745	positive regulation of lamellipodium organization	7/1569	36/28814	0.00290570158501724	0.0162593753102047	0.0117550943874027	Cfl1/Cdc42/Arpc2/Brk1/Rac1/Auts2/Akirin1	7
GO:0032986	GO:0032986	protein-DNA complex disassembly	5/1569	19/28814	0.00291122483164806	0.0162593753102047	0.0117550943874027	Supt16/Smarcc1/Smarce1/Smarca4/Smarcd1	5
GO:0043046	GO:0043046	DNA methylation involved in gamete generation	5/1569	19/28814	0.00291122483164806	0.0162593753102047	0.0117550943874027	Fkbp6/Ddx4/Tdrkh/Mael/Mov10l1	5
GO:0046827	GO:0046827	positive regulation of protein export from nucleus	5/1569	19/28814	0.00291122483164806	0.0162593753102047	0.0117550943874027	Tpr/Anp32b/Ywhae/Mdm2/Ctdspl2	5
GO:0070935	GO:0070935	3'-UTR-mediated mRNA stabilization	5/1569	19/28814	0.00291122483164806	0.0162593753102047	0.0117550943874027	Dazl/Hnrnpa0/Mettl16/Tardbp/Angel2	5
GO:0071450	GO:0071450	cellular response to oxygen radical	5/1569	19/28814	0.00291122483164806	0.0162593753102047	0.0117550943874027	Prdx1/Sod1/Sod2/Parp1/Dhfr	5
GO:0071451	GO:0071451	cellular response to superoxide	5/1569	19/28814	0.00291122483164806	0.0162593753102047	0.0117550943874027	Prdx1/Sod1/Sod2/Parp1/Dhfr	5
GO:1900037	GO:1900037	regulation of cellular response to hypoxia	5/1569	19/28814	0.00291122483164806	0.0162593753102047	0.0117550943874027	Rock2/Chchd2/Tmbim6/Usp19/Commd1	5
GO:0060537	GO:0060537	muscle tissue development	42/1569	493/28814	0.00291281699870017	0.0162593753102047	0.0117550943874027	Ddx5/Cenpf/Cacybp/Hnrnpu/Psma6/Ndufv2/Cdc42/Uqcc2/Tomm70a/Sin3b/Naca/Zfand5/Jarid2/Fkbp1a/Tiparp/Cops2/Pin1/Prkar1a/Cfl2/Luc7l/Rhoa/Cdk1/Ddx17/Ddx39b/Pak1/Yy1/Ctnnb1/Ift88/Ift20/Prmt1/Akirin1/Mef2a/Myl6/Usp19/Hdac2/Tsc22d3/Apc/Ep300/Sirt1/Lrp6/Rbp4/Gjc1	42
GO:0061351	GO:0061351	neural precursor cell proliferation	21/1569	199/28814	0.00291698081539607	0.0162654057095288	0.011759454205163	Gng5/Pafah1b1/Nap1l1/Kdm1a/Spint2/Pcm1/Mdk/Gnai2/Rab10/Rhoa/Ctnnb1/Kif3a/Ift88/Ift20/Psmg1/Hif1a/Ctnna1/Afdn/Kdm2b/Lrp6/Tacc1	21
GO:0006898	GO:0006898	receptor-mediated endocytosis	26/1569	266/28814	0.00295053850916674	0.0164351537865412	0.0118821775342757	Fmr1/Atp5b/Cd2ap/Hnrnpk/Ctsl/Arf1/Smap1/Itsn2/Fnbp1l/Lrpap1/Cd63/Fcho2/Cltc/Eps15/Pikfyve/Kif3a/Ap2m1/Canx/Atxn2/Nedd4/Rab5a/Ap1g1/Synj2bp/Clta/Lrp6/App	26
GO:0050808	GO:0050808	synapse organization	42/1569	494/28814	0.00302062682111858	0.0167746651827854	0.0121276352122188	Actb/Hspa8/Pafah1b1/Fmr1/Rock2/Arf4/Ckap5/Cfl1/Cdc42/Hnrnpk/Chd4/Caprin2/Dhx36/Vcp/Caprin1/Ube3a/Arf1/Pin1/Rheb/Vps35/Tanc2/Unc13b/Ptk2/Cadm1/Pfn1/Rhoa/Ube2v2/Ywhaz/Pak1/Cript/Ctnnb1/Pgrmc1/Ppfibp1/Cdc20/Chmp4b/Chchd10/Nedd4/Afdn/Snx27/Adnp/App/Eif4g1	42
GO:0032092	GO:0032092	positive regulation of protein binding	13/1569	100/28814	0.00302236708680658	0.0167746651827854	0.0121276352122188	Hsp90ab1/Ran/Caprin2/Hspa4/Pin1/Krit1/Nmd3/Mapre1/Mark3/Map1lc3b/Ppp2ca/Ep300/App	13
GO:0006086	GO:0006086	acetyl-CoA biosynthetic process from pyruvate	4/1569	12/28814	0.00304646999907269	0.0167746651827854	0.0121276352122188	Mpc2/Mpc1/Dld/Pdk3	4
GO:0006335	GO:0006335	DNA replication-dependent chromatin assembly	4/1569	12/28814	0.00304646999907269	0.0167746651827854	0.0121276352122188	Nasp/Hat1/Rbbp4/Asf1b	4
GO:0033523	GO:0033523	histone H2B ubiquitination	4/1569	12/28814	0.00304646999907269	0.0167746651827854	0.0121276352122188	Rnf20/Ctr9/Ube2e1/Cdc73	4
GO:0034088	GO:0034088	maintenance of mitotic sister chromatid cohesion	4/1569	12/28814	0.00304646999907269	0.0167746651827854	0.0121276352122188	Nipbl/Smc5/Slf1/Slf2	4
GO:0034723	GO:0034723	DNA replication-dependent chromatin organization	4/1569	12/28814	0.00304646999907269	0.0167746651827854	0.0121276352122188	Nasp/Hat1/Rbbp4/Asf1b	4
GO:0043248	GO:0043248	proteasome assembly	4/1569	12/28814	0.00304646999907269	0.0167746651827854	0.0121276352122188	Sem1/Psmd11/Psmg4/Psmg1	4
GO:1902166	GO:1902166	negative regulation of intrinsic apoptotic signaling pathway in response to DNA damage by p53 class mediator	4/1569	12/28814	0.00304646999907269	0.0167746651827854	0.0121276352122188	Kdm1a/Mif/Atad5/Sirt1	4
GO:1903025	GO:1903025	regulation of RNA polymerase II regulatory region sequence-specific DNA binding	4/1569	12/28814	0.00304646999907269	0.0167746651827854	0.0121276352122188	Nsd1/Lamtor5/Fbxw7/Ep300	4
GO:1905907	GO:1905907	negative regulation of amyloid fibril formation	4/1569	12/28814	0.00304646999907269	0.0167746651827854	0.0121276352122188	Pfdn2/Pfdn5/Pfdn4/Pfdn6	4
GO:0030834	GO:0030834	regulation of actin filament depolymerization	9/1569	56/28814	0.0030724333513679	0.0168823811754851	0.0122055110000065	Mphosph8/Cfl1/Arpc2/Sptan1/Cfl2/Mtpn/Capza2/Add3/Rdx	9
GO:0072698	GO:0072698	protein localization to microtubule cytoskeleton	9/1569	56/28814	0.0030724333513679	0.0168823811754851	0.0122055110000065	Hnrnpu/Cep83/Golgb1/Pcm1/Mapre1/Cript/Kif20b/Nsfl1c/Apc	9
GO:1905475	GO:1905475	regulation of protein localization to membrane	21/1569	200/28814	0.00309624605758242	0.0169955233649815	0.0122873097832533	Rack1/Actb/Pdcd5/Arpc2/Csnk2a1/Tmem59/Sh3glb1/Hectd1/Lztfl1/Kif5b/Cltc/Pak1/Cript/Appl1/Pgrmc1/Ap2m1/Vti1b/Snx27/Rab11a/Commd1/Rab11fip2	21
GO:2001056	GO:2001056	positive regulation of cysteine-type endopeptidase activity	17/1569	149/28814	0.00315761236328903	0.017314350536746	0.0125178133189585	Rack1/Casp8ap2/Hmgb1/Anp32b/Pdcd5/Hspd1/Vcp/Cycs/Rhoa/Rnf7/Cyct/Mtch2/Ppp2ca/Fam162a/Sirt1/App/Bcap31	17
GO:2000736	GO:2000736	regulation of stem cell differentiation	10/1569	67/28814	0.00323942929635478	0.0177445374229195	0.0128288269559965	Hnrnpu/Cdk12/Nudt21/Dhx36/Hspa9/Ythdf2/N4bp2l2/Cdk13/Mtch2/Kdm3a	10
GO:0032413	GO:0032413	negative regulation of ion transmembrane transporter activity	11/1569	78/28814	0.00325631285032901	0.0178185168936572	0.0128823121388316	Fmr1/1810037I17Rik/Calm1/Park7/Sumo1/Ywhae/Calm2/Calm3/Nedd4/Snx27/Ppp2ca	11
GO:0097061	GO:0097061	dendritic spine organization	13/1569	101/28814	0.00329983555436285	0.0180379611909472	0.0130409645088155	Pafah1b1/Ckap5/Cfl1/Cdc42/Caprin2/Dhx36/Caprin1/Ube3a/Arf1/Vps35/Tanc2/Afdn/App	13
GO:0001933	GO:0001933	negative regulation of protein phosphorylation	32/1569	352/28814	0.00332375175615972	0.018131117387531	0.0131083139526116	Npm1/Ppia/Rack1/Actb/Dnaja1/Dnajc3/Ube2b/Rtraf/Park7/Tmed2/Ppp4r2/Hspa4/Prkar1a/Ppp4r3b/Inca1/Tsg101/Taf7/Adarb1/Pkig/Ptpn2/Stk38/Dnajc10/Ibtk/Chordc1/Tardbp/Ppp2ca/Apc/Cep85/Sirt1/Lrp6/Ppp4c/Eif4g1	32
GO:0071900	GO:0071900	regulation of protein serine/threonine kinase activity	32/1569	352/28814	0.00332375175615972	0.018131117387531	0.0131083139526116	Actb/Hsp90ab1/Dnaja1/Higd1a/Kras/Cdk12/Mif/Spdya/Syap1/Pdcd10/Ccni/Ezh2/Prkar1a/Inca1/Magi3/Tsg101/Rhoa/Dazap2/Pak1/Pkig/Stk38/Maged1/Ccne2/Gtpbp4/Chordc1/Ppp2ca/Apc/Ccnh/Sirt1/Mapk8ip3/Lrp6/App	32
GO:0022604	GO:0022604	regulation of cell morphogenesis	31/1569	338/28814	0.00334311003079718	0.0182178774922057	0.0131710391926688	Calr/Pafah1b1/Cfl1/Cdc42/Ttc3/Hnrnpk/Prpf40a/Caprin2/Dhx36/Larp4/Arpc2/Rtn4/Myo9a/Caprin1/Mdk/Epb41l2/Sh3glb1/Macf1/Itsn2/Ptk2/Brwd1/Rhoa/Rac1/Zmym4/Kif3a/P4hb/Cux1/Afdn/Zranb1/Rdx/Cfdp1	31
GO:0010923	GO:0010923	negative regulation of phosphatase activity	7/1569	37/28814	0.00341792711760734	0.0185298720918589	0.0133966029610985	Rock1/Rock2/Uri1/Bod1l/Gnai2/Mprip/Bag4	7
GO:0032435	GO:0032435	negative regulation of proteasomal ubiquitin-dependent protein catabolic process	7/1569	37/28814	0.00341792711760734	0.0185298720918589	0.0133966029610985	Hsp90ab1/Ubxn1/Park7/Smarcc1/Eif3h/Rybp/Usp7	7
GO:0036475	GO:0036475	neuron death in response to oxidative stress	7/1569	37/28814	0.00341792711760734	0.0185298720918589	0.0133966029610985	Rack1/Park7/Fbxw7/Ctnnb1/Parp1/Hif1a/App	7
GO:0046825	GO:0046825	regulation of protein export from nucleus	7/1569	37/28814	0.00341792711760734	0.0185298720918589	0.0133966029610985	Tpr/Anp32b/Park7/Ywhae/Xpo1/Mdm2/Ctdspl2	7
GO:0071364	GO:0071364	cellular response to epidermal growth factor stimulus	7/1569	37/28814	0.00341792711760734	0.0185298720918589	0.0133966029610985	Ncl/Eef1a1/Cfl1/Syap1/Arpc2/Rasa1/Bag4	7
GO:0043486	GO:0043486	histone exchange	6/1569	28/28814	0.00345437691626959	0.0186890648546893	0.0135116950797784	Ptma/Nasp/1700013H16Rik/Sycp3/Cenpp/Xlr	6
GO:2000737	GO:2000737	negative regulation of stem cell differentiation	6/1569	28/28814	0.00345437691626959	0.0186890648546893	0.0135116950797784	Hnrnpu/Cdk12/Hspa9/Ythdf2/N4bp2l2/Cdk13	6
GO:1990830	GO:1990830	cellular response to leukemia inhibitory factor	29/1569	311/28814	0.00350860554802682	0.0189630064199196	0.0137097475199538	Ncl/Hells/Smarca5/Cacybp/Srsf3/Hnrnpu/Rif1/Nol8/Kdm5b/Sycp3/Srsf7/Gclm/Rnf138/Mat2a/Bclaf1/Mpc1/Eif4a2/Pdcd10/Jarid2/Mga/Elavl2/Gtf2h1/Kdm3a/Enah/Tex14/Sdad1/Ubxn2a/Sirt1/Mrpl15	29
GO:0009394	GO:0009394	2'-deoxyribonucleotide metabolic process	8/1569	47/28814	0.00357377115309715	0.0192363702373342	0.0139073822638786	Nme2/Dctpp1/Dut/Cmpk1/Nme1/Adk/Ak2/Oga	8
GO:0010907	GO:0010907	positive regulation of glucose metabolic process	8/1569	47/28814	0.00357377115309715	0.0192363702373342	0.0139073822638786	Hmgb1/Arpp19/Ppp4r3b/Ptpn2/Ppp4r3a/Hif1a/Ddb1/Sirt1	8
GO:0019692	GO:0019692	deoxyribose phosphate metabolic process	8/1569	47/28814	0.00357377115309715	0.0192363702373342	0.0139073822638786	Nme2/Dctpp1/Dut/Cmpk1/Nme1/Adk/Ak2/Oga	8
GO:0030835	GO:0030835	negative regulation of actin filament depolymerization	8/1569	47/28814	0.00357377115309715	0.0192363702373342	0.0139073822638786	Mphosph8/Cfl1/Arpc2/Sptan1/Mtpn/Capza2/Add3/Rdx	8
GO:0030968	GO:0030968	endoplasmic reticulum unfolded protein response	10/1569	68/28814	0.0036164368212236	0.0194263790549435	0.0140447535676847	Pdia6/Dnajc3/Hspa5/Eif2s1/Tmed2/Ptpn2/Dnajc10/Qrich1/Ep300/Stub1	10
GO:0032481	GO:0032481	positive regulation of type I interferon production	10/1569	68/28814	0.0036164368212236	0.0194263790549435	0.0140447535676847	Hsp90aa1/Hmgb1/Hmgb2/Tomm70a/Hspd1/Dhx36/G3bp1/Zbtb20/Chuk/Setd2	10
GO:0051147	GO:0051147	regulation of muscle cell differentiation	17/1569	151/28814	0.00362578429560829	0.0194567773747037	0.0140667307415418	Eif5a/Ybx1/Tomm70a/Naca/Sod2/Ezh2/Ankrd17/Pin1/Ddx39b/Pak1/Yy1/Setd3/Med28/Rbpms2/Mdm2/Sirt1/Tmsb4x	17
GO:1990823	GO:1990823	response to leukemia inhibitory factor	29/1569	312/28814	0.00367247187861912	0.0196872857314186	0.0142333821311907	Ncl/Hells/Smarca5/Cacybp/Srsf3/Hnrnpu/Rif1/Nol8/Kdm5b/Sycp3/Srsf7/Gclm/Rnf138/Mat2a/Bclaf1/Mpc1/Eif4a2/Pdcd10/Jarid2/Mga/Elavl2/Gtf2h1/Kdm3a/Enah/Tex14/Sdad1/Ubxn2a/Sirt1/Mrpl15	29
GO:0007039	GO:0007039	protein catabolic process in the vacuole	5/1569	20/28814	0.0037094940302046	0.0198454168451615	0.0143477067059157	Vps35/Vps13a/Tmem199/Ccdc115/Lamp2	5
GO:0045948	GO:0045948	positive regulation of translational initiation	5/1569	20/28814	0.0037094940302046	0.0198454168451615	0.0143477067059157	Dazl/Dnajc3/Khdrbs1/Ythdf2/Polr2g	5
GO:0032479	GO:0032479	regulation of type I interferon production	13/1569	103/28814	0.0039168850294756	0.0209248429053733	0.0151281029376239	Hsp90aa1/Hmgb1/Hmgb2/Tomm70a/Hspd1/Dhx36/Banf1/Rnf216/Yy1/G3bp1/Zbtb20/Chuk/Setd2	13
GO:0043470	GO:0043470	regulation of carbohydrate catabolic process	9/1569	58/28814	0.00391919332521495	0.0209248429053733	0.0151281029376239	Hmgb1/Mtch2/Ppp1cb/Ppp1ca/Hif1a/Ncor1/Zbtb20/Ep300/App	9
GO:1903076	GO:1903076	regulation of protein localization to plasma membrane	14/1569	115/28814	0.00392715471368063	0.0209461487509255	0.0151435064953062	Rack1/Actb/Csnk2a1/Tmem59/Hectd1/Kif5b/Cltc/Appl1/Pgrmc1/Ap2m1/Vti1b/Rab11a/Commd1/Rab11fip2	14
GO:0050714	GO:0050714	positive regulation of protein secretion	18/1569	165/28814	0.0039445708743631	0.0210177892548135	0.0151953006675359	Ppia/Dynll1/Ier3ip1/Cd2ap/Bsg/Mpc2/Tmed10/Arf1/Vps35/Unc13b/Kif5b/Rac1/Hif1a/Tardbp/Ppp3cb/Sirt1/Rbp4/Oga	18
GO:0051648	GO:0051648	vesicle localization	20/1569	191/28814	0.0039514604001644	0.0210332528868488	0.0152064804607739	Pafah1b1/Cul3/Tmed10/Sar1a/Arf1/Vps4b/Tanc2/Kif1b/Kif5b/Fnbp1l/Tsg101/Gbf1/Ctnnb1/Trip11/Dync1h1/Rab11a/Ap3s1/Snf8/Ap1s2/Rab1a	20
GO:0006094	GO:0006094	gluconeogenesis	11/1569	80/28814	0.00397411180166665	0.0211112182817639	0.0152628473604052	Arpp19/Ranbp2/Ppp4r3b/Ptpn2/Ppp4r3a/Hif1a/Usp7/Ddb1/Ep300/Sirt1/Rbp4	11
GO:0006414	GO:0006414	translational elongation	11/1569	80/28814	0.00397411180166665	0.0211112182817639	0.0152628473604052	Rack1/Eef1a1/Eef1b2/Eif5a/Srp9/Usp16/Eef2/Ascc3/Eef1d/Eef1g/Eefsec	11
GO:0021799	GO:0021799	cerebral cortex radially oriented cell migration	7/1569	38/28814	0.00399610846221751	0.0212067124126734	0.0153318870683194	Pafah1b1/Rtn4/Rac1/Rnf7/Srgap2/Ctnnb1/Cul5	7
GO:0006879	GO:0006879	cellular iron ion homeostasis	10/1569	69/28814	0.00402738852524572	0.0213512306237901	0.0154363698777734	Fth1/Sod1/Ftl1/Atp6v1g1/Bola2/Ndfip1/Glrx3/Tmem199/Hif1a/Ccdc115	10
GO:0010971	GO:0010971	positive regulation of G2/M transition of mitotic cell cycle	6/1569	29/28814	0.00415781689432045	0.0219764369915234	0.0158883773949193	Vps4b/Cdk1/Hspa2/Dtl/Rab11a/App	6
GO:0031365	GO:0031365	N-terminal protein amino acid modification	6/1569	29/28814	0.00415781689432045	0.0219764369915234	0.0158883773949193	Metap2/Naa50/Naa15/Naa35/Nmt2/Ep300	6
GO:0060571	GO:0060571	morphogenesis of an epithelial fold	6/1569	29/28814	0.00415781689432045	0.0219764369915234	0.0158883773949193	Luzp1/Cfl1/Gatad2a/Ctnnb1/Hif1a/Cecr2	6
GO:0000012	GO:0000012	single strand break repair	4/1569	13/28814	0.0042121771864216	0.0221086912023621	0.0159839936594977	Smc4/Parp1/Smc2/Sirt1	4
GO:0006895	GO:0006895	Golgi to endosome transport	4/1569	13/28814	0.0042121771864216	0.0221086912023621	0.0159839936594977	Rab14/Gbf1/Eps15/Dop1a	4
GO:0033169	GO:0033169	histone H3-K9 demethylation	4/1569	13/28814	0.0042121771864216	0.0221086912023621	0.0159839936594977	Kdm1a/Kdm7a/Kdm3a/Jmjd1c	4
GO:0043922	GO:0043922	negative regulation by host of viral transcription	4/1569	13/28814	0.0042121771864216	0.0221086912023621	0.0159839936594977	Hdac1/Nucks1/Tardbp/Psmc3	4
GO:0048012	GO:0048012	hepatocyte growth factor receptor signaling pathway	4/1569	13/28814	0.0042121771864216	0.0221086912023621	0.0159839936594977	Stmn1/Rac1/Pak1/Ptpn2	4
GO:0090085	GO:0090085	regulation of protein deubiquitination	4/1569	13/28814	0.0042121771864216	0.0221086912023621	0.0159839936594977	Ubxn1/Park7/Vcp/Otud4	4
GO:0098935	GO:0098935	dendritic transport	4/1569	13/28814	0.0042121771864216	0.0221086912023621	0.0159839936594977	Hnrnpu/Sfpq/Kif5b/Pura	4
GO:0010770	GO:0010770	positive regulation of cell morphogenesis involved in differentiation	13/1569	104/28814	0.00425863269878728	0.0223303056521898	0.0161442149918451	Calr/Pafah1b1/Cdc42/Caprin2/Dhx36/Arpc2/Caprin1/Mdk/Sh3glb1/Rac1/P4hb/Cux1/Afdn	13
GO:1904375	GO:1904375	regulation of protein localization to cell periphery	16/1569	141/28814	0.00433430214872827	0.0227045122488	0.0164147563736398	Rack1/Actb/Csnk2a1/Epb41l2/Tmem59/Hectd1/Lztfl1/Kif5b/Cltc/Appl1/Pgrmc1/Ap2m1/Vti1b/Rab11a/Commd1/Rab11fip2	16
GO:0032088	GO:0032088	negative regulation of NF-kappaB transcription factor activity	11/1569	81/28814	0.00437747337770016	0.0228852052203849	0.0165453925694097	Tut4/Tax1bp1/Siva1/Trim37/Cyld/Usp7/Chuk/Peli1/Faf1/Commd1/Sirt1	11
GO:0036465	GO:0036465	synaptic vesicle recycling	11/1569	81/28814	0.00437747337770016	0.0228852052203849	0.0165453925694097	Actb/Actg1/Rock1/Itsn2/Fcho2/Cltc/Ap2m1/Canx/Ppp3cb/Rab5a/Ap1s2	11
GO:0001825	GO:0001825	blastocyst formation	9/1569	59/28814	0.00440582290254925	0.0229878494668124	0.0166196016200072	Matr3/Cul3/Pbrm1/Sf3b1/Rtn4/Rbm46/Ctr9/Sf3b6/Tjp1	9
GO:0010662	GO:0010662	regulation of striated muscle cell apoptotic process	9/1569	59/28814	0.00440582290254925	0.0229878494668124	0.0166196016200072	Npm1/Hspa8/Eif5a/Qk/Naca/Pdpk1/Mdk/Sirt1/Pcmt1	9
GO:0001889	GO:0001889	liver development	15/1569	129/28814	0.00448610192208279	0.0233835846235047	0.0169057075761452	Mki67/Cul3/Sod2/Rb1cc1/Rtn4/Jarid2/Ezh2/Mdk/Sec63/Smarca4/Cadm1/Atf2/Taf10/Ift88/Pkm	15
GO:0007029	GO:0007029	endoplasmic reticulum organization	12/1569	93/28814	0.00456397389323095	0.0237660042317801	0.017182186746169	Arl6ip1/Tmed2/Rtn3/Rtn4/Emc6/Emc7/Lnpk/Lman2/Rab10/Emc2/Rab18/Mia3	12
GO:0006622	GO:0006622	protein targeting to lysosome	5/1569	21/28814	0.00465313117147946	0.0239882740460322	0.0173428818895036	Hspa8/Zfyve16/Gcc2/Nedd4/Lamp2	5
GO:0006896	GO:0006896	Golgi to vacuole transport	5/1569	21/28814	0.00465313117147946	0.0239882740460322	0.0173428818895036	Vps29/Vti1b/Ap3s1/Lamp1/Ap1g1	5
GO:0043101	GO:0043101	purine-containing compound salvage	5/1569	21/28814	0.00465313117147946	0.0239882740460322	0.0173428818895036	Impdh2/Adss/Gmps/Adk/Hprt	5
GO:0043555	GO:0043555	regulation of translation in response to stress	5/1569	21/28814	0.00465313117147946	0.0239882740460322	0.0173428818895036	Npm1/Dnajc3/Eif2s1/Tmed2/Eif4g1	5
GO:0046755	GO:0046755	viral budding	5/1569	21/28814	0.00465313117147946	0.0239882740460322	0.0173428818895036	Vps4b/Tsg101/Chmp4b/Nedd4/Snf8	5
GO:0051900	GO:0051900	regulation of mitochondrial depolarization	5/1569	21/28814	0.00465313117147946	0.0239882740460322	0.0173428818895036	Rack1/Gclm/Parp1/Gclc/Oga	5
GO:1903209	GO:1903209	positive regulation of oxidative stress-induced cell death	5/1569	21/28814	0.00465313117147946	0.0239882740460322	0.0173428818895036	Sod1/Sfpq/Park7/Fbxw7/App	5
GO:1903902	GO:1903902	positive regulation of viral life cycle	5/1569	21/28814	0.00465313117147946	0.0239882740460322	0.0173428818895036	Fmr1/Bsg/Tsg101/P4hb/Kpna2	5
GO:0009262	GO:0009262	deoxyribonucleotide metabolic process	8/1569	49/28814	0.00465668106599754	0.0239882740460322	0.0173428818895036	Nme2/Dctpp1/Dut/Cmpk1/Nme1/Adk/Ak2/Oga	8
GO:0044848	GO:0044848	biological phase	8/1569	49/28814	0.00465668106599754	0.0239882740460322	0.0173428818895036	Dek/Ube2b/Sycp2/Ctsl/Ctnnb1/Cdc20/Topaz1/Jmjd1c	8
GO:0072666	GO:0072666	establishment of protein localization to vacuole	8/1569	49/28814	0.00465668106599754	0.0239882740460322	0.0173428818895036	Hspa8/Vps13a/Zfyve16/Vps37a/Gcc2/Nedd4/Snf8/Lamp2	8
GO:0044774	GO:0044774	mitotic DNA integrity checkpoint signaling	11/1569	82/28814	0.00481269431035971	0.0247677682801439	0.017906435416106	Tipin/Topbp1/Nae1/Taok1/Rad17/Cdk1/Gigyf2/Atf2/Dtl/Clspn/Mdm2	11
GO:0014706	GO:0014706	striated muscle tissue development	27/1569	290/28814	0.00482744980475871	0.0248194909552653	0.0179438295297433	Cenpf/Cacybp/Hnrnpu/Ndufv2/Cdc42/Tomm70a/Sin3b/Jarid2/Fkbp1a/Pin1/Prkar1a/Luc7l/Cdk1/Ddx39b/Pak1/Yy1/Ctnnb1/Ift88/Ift20/Prmt1/Mef2a/Hdac2/Apc/Sirt1/Lrp6/Rbp4/Gjc1	27
GO:0010659	GO:0010659	cardiac muscle cell apoptotic process	9/1569	60/28814	0.00493824494678421	0.0253151040760804	0.0183021445882044	Npm1/Hspa8/Eif5a/Qk/Gnb1/Pdpk1/Mdk/Sirt1/Pcmt1	9
GO:0030042	GO:0030042	actin filament depolymerization	9/1569	60/28814	0.00493824494678421	0.0253151040760804	0.0183021445882044	Mphosph8/Cfl1/Arpc2/Sptan1/Cfl2/Mtpn/Capza2/Add3/Rdx	9
GO:0044380	GO:0044380	protein localization to cytoskeleton	9/1569	60/28814	0.00493824494678421	0.0253151040760804	0.0183021445882044	Hnrnpu/Cep83/Golgb1/Pcm1/Mapre1/Cript/Kif20b/Nsfl1c/Apc	9
GO:0043162	GO:0043162	ubiquitin-dependent protein catabolic process via the multivesicular body sorting pathway	6/1569	30/28814	0.00496165316522619	0.025385761829843	0.018353228258323	Vps4b/Tsg101/Chmp4b/Vps37a/Nedd4/Snf8	6
GO:0046039	GO:0046039	GTP metabolic process	6/1569	30/28814	0.00496165316522619	0.025385761829843	0.018353228258323	Ran/Nme2/Impdh2/Rhoa/Gnai3/Nme1	6
GO:0048588	GO:0048588	developmental cell growth	26/1569	277/28814	0.00504678910338566	0.0257963299615885	0.0186500580595331	Pafah1b1/Hsp90ab1/Hsp90aa1/Kdm1a/Atp5g1/Tomm70a/Hnrnpk/Golga4/Usp9x/Fubp1/Rtn4/Sh3glb1/Pin1/Macf1/Itsn2/Ddx39b/Auts2/Pak1/Yy1/Ctnnb1/Wdr36/Afdn/Rab11a/Sirt1/Adnp/App	26
GO:0019319	GO:0019319	hexose biosynthetic process	11/1569	83/28814	0.00528148485611946	0.0269330331587305	0.0194718641325179	Arpp19/Ranbp2/Ppp4r3b/Ptpn2/Ppp4r3a/Hif1a/Usp7/Ddb1/Ep300/Sirt1/Rbp4	11
GO:0055021	GO:0055021	regulation of cardiac muscle tissue growth	11/1569	83/28814	0.00528148485611946	0.0269330331587305	0.0194718641325179	Tomm70a/Jarid2/Pin1/Cdk1/Ddx39b/Pak1/Yy1/Hdac2/Apc/Sirt1/Rbp4	11
GO:0006998	GO:0006998	nuclear envelope organization	8/1569	50/28814	0.00528449086621536	0.0269330331587305	0.0194718641325179	Pafah1b1/Banf1/Akap8l/Spast/Chmp4b/Nsfl1c/Tardbp/Ubxn2a	8
GO:0010720	GO:0010720	positive regulation of cell development	33/1569	378/28814	0.00536930300797794	0.0272169408078031	0.0196771217853172	Calr/Pafah1b1/Fmr1/Nap1l1/Cdc42/Kdm1a/Qk/Atp5g1/Caprin2/Golga4/Dhx36/Stk25/Arpc2/Rtn4/Caprin1/Hdac1/Mdk/Sh3glb1/Rheb/Macf1/Ptk2/Rac1/Pak1/Ptpra/Ctnnb1/P4hb/Cux1/Akap11/Hif1a/Afdn/Rab11a/Hdac2/Adnp	33
GO:0007094	GO:0007094	mitotic spindle assembly checkpoint signaling	7/1569	40/28814	0.00537115362671527	0.0272169408078031	0.0196771217853172	Tpr/Bub1/Cenpe/Ik/Tex14/Apc/Zfp207	7
GO:0010591	GO:0010591	regulation of lamellipodium assembly	7/1569	40/28814	0.00537115362671527	0.0272169408078031	0.0196771217853172	Cfl1/Cdc42/Arpc2/Brk1/Rac1/Auts2/Akirin1	7
GO:0031297	GO:0031297	replication fork processing	7/1569	40/28814	0.00537115362671527	0.0272169408078031	0.0196771217853172	Brca2/Alyref/Atr/Pcna/Bod1l/Nucks1/Thoc1	7
GO:0043628	GO:0043628	ncRNA 3'-end processing	7/1569	40/28814	0.00537115362671527	0.0272169408078031	0.0196771217853172	Ssb/Ints6/Larp7/Exosc8/Fbl/Eri1/Ints8	7
GO:0071173	GO:0071173	spindle assembly checkpoint signaling	7/1569	40/28814	0.00537115362671527	0.0272169408078031	0.0196771217853172	Tpr/Bub1/Cenpe/Ik/Tex14/Apc/Zfp207	7
GO:0001678	GO:0001678	cellular glucose homeostasis	18/1569	170/28814	0.0053923806552449	0.027272107340764	0.019717005716256	Dynll1/Rack1/Mpc2/Eny2/Smarca4/Unc13b/Nucks1/Kif5b/Rac1/Alms1/Pdk3/Hif1a/Ppp3cb/Ppp2ca/Zbtb20/Sirt1/Rab11fip2/Tra2b	18
GO:0010950	GO:0010950	positive regulation of endopeptidase activity	18/1569	170/28814	0.0053923806552449	0.027272107340764	0.019717005716256	Rack1/Casp8ap2/Hmgb1/Anp32b/Rock2/Pdcd5/Hspd1/Vcp/Cycs/Rhoa/Rnf7/Cyct/Mtch2/Ppp2ca/Fam162a/Sirt1/App/Bcap31	18
GO:0032606	GO:0032606	type I interferon production	13/1569	107/28814	0.0054303274850209	0.0273852557203492	0.0197988089747718	Hsp90aa1/Hmgb1/Hmgb2/Tomm70a/Hspd1/Dhx36/Banf1/Rnf216/Yy1/G3bp1/Zbtb20/Chuk/Setd2	13
GO:0034766	GO:0034766	negative regulation of ion transmembrane transport	13/1569	107/28814	0.0054303274850209	0.0273852557203492	0.0197988089747718	Fmr1/1810037I17Rik/Calm1/Park7/Sumo1/Ywhae/Pik3c2a/Calm2/Calm3/Nedd4/Snx27/Ppp2ca/Commd1	13
GO:2000243	GO:2000243	positive regulation of reproductive process	13/1569	107/28814	0.0054303274850209	0.0273852557203492	0.0197988089747718	Stra8/Dazl/Meioc/Ube2b/Park7/Ythdc2/Ankrd31/Prdm9/Rac1/Ctnnb1/Topaz1/Hdac2/Sgo2a	13
GO:2000241	GO:2000241	regulation of reproductive process	21/1569	210/28814	0.00545330161392536	0.027474848150388	0.0198635819104726	Stra8/Dazl/Calr/Tex101/Hormad1/Prdx4/Meioc/Ube2b/Park7/Ythdc2/Ankrd31/Prdm9/Rac1/Ythdf2/Psma8/Ctnnb1/Cdc20/Topaz1/Hdac2/Sgo2a/Apc	21
GO:2000756	GO:2000756	regulation of peptidyl-lysine acetylation	10/1569	72/28814	0.00548481676746745	0.0276072599698385	0.0199593121218708	Park7/Iws1/Kmt2a/Taf7/Brd7/Zfp451/Auts2/Hdac2/Sirt1/App	10
GO:0010656	GO:0010656	negative regulation of muscle cell apoptotic process	9/1569	61/28814	0.00551924846218509	0.0277276529885965	0.0200463530611495	Npm1/Hspa8/Qk/Naca/Pdpk1/Mdk/Sirt1/Lrp6/Pcmt1	9
GO:0035065	GO:0035065	regulation of histone acetylation	9/1569	61/28814	0.00551924846218509	0.0277276529885965	0.0200463530611495	Park7/Iws1/Kmt2a/Taf7/Brd7/Zfp451/Auts2/Sirt1/App	9
[truncated: 4,225 more rows]
